# Supplementary material for: Genetic Diversity and Population Structure of Sorghum [Sorghum Bicolor (L.) Moench] Accessions as Revealed by Single Nucleotide Polymorphism Markers
Source: Front Plant Sci. 2022 Jan 5;12:799482. doi: 10.3389/fpls.2021.799482 (PMC8766336; doi:10.3389/fpls.2021.799482)
Supplement: Supplementary file 6 [file Table_1.XLSX]

## Sheet: Sheet1
Supplementary Table 1 Passport data of the 24 sorghum accessions and their administrative regions, geographic regions, agro-ecological zones and peduncle shape
Accession Code	Accession Number	Administartive region	Latitude	Longitude	Altitude	Climate	Geographic region	Agro-ecological zones	Peduncle Shape	Seed color	panicl density	Days to flowering	Plant height
SB1	23655	Benishangul-Gumuz	11-16-05-N	35-17-17-E	858	Tropical zone	Western	warm/semiarid	bent	red	semi loose	93.17	185.67
SB2	69265	Oromiya	09-17-00-N	41-05-00-E	1965	Subtropical zone	Eastern	cool/Semiarid	bent	white	semi compact	104.33	289.7
SB3	69307	Amhara	13-21-00-N	37-54-00-E	1480	Tropical zone	Northern	cool/Semiarid	bent	yellow	semi loose	90.17	261.7
SB4	69500	SNNP	05-25-00-N	37-24-00-E	1300	Tropical zone	Western	cool/subhumid	bent	light brown	loose	99.33	338.3
SB5	237308	Tigray	14-00-00-N	38-00-00-E	1520	Tropical zone	Northern	cool/Semiarid	erect	white	semi compact	95.57	215.8
SB6	237309	Tigray	11-57-00-N	38-41-00-E	1800	Tropical zone	Northern	cool/Semiarid	bent	yellow	semi compact	99.13	222.1
SB7	238455	Amara	12-08-00-N	38-05-00-E	1890	Subtropical zone	Northern	cool/Semiarid	bent	red	semi loose	104.6	264.3
SB8	239113	Dire Dawa	09-36-26-N	41-06-66-E	1200	Tropical zone	Eastern	cool/Semiarid	bent	light yellow	compact	93.63	248.3
SB9	239116	Dire Dawa	09-34-08-N	41-44-45-E	1320	Tropical zone	Eastern	cool/Semiarid	bent	red	compact	92.93	207.5
SB10	239122	Dire Dawa	09-30-26-N	41-46-13-E	1540	Tropical zone	Eastern	cool/Semiarid	bent	yellow	compact	112.63	228.9
SB11	239137	Dire Dawa	09-37-97-N	42-08-66-E	1380	Tropical zone	Eastern	cool/Semiarid	erect	white	compact	112.67	311.7
SB12	239151	Amhara	10-58-33-N	39-46-20-E	1560	Tropical zone	Northern	cool/subhumid	erect	white	compact	105.63	250.83
SB13	239192	Amhara	10-58-33-N	39-46-20-E	1560	Tropical zone	Northern	cool/subhumid	bent	light brown	semi compact	101.1	277
SB14	239195	Amhara	10-58-17-N	39-46-40-E	1580	Tropical zone	Northern	cool/subhumid	erect	light brown	compact	111.9	297.2
SB15	239219	Amhara	11-12-44-N	40-00-96-E	1670	Tropical zone	Northern	cool/Semiarid	erect	light brown	semi loose	100.43	151.67
SB16	239249	Amhara	11-43-65-N	38-55-73-E	2320	Subtropical zone	Northern	cool/Semiarid	erect	red	compact	103.67	281
SB17	241288	Oromiya	09-17-32-N	40-50-55-E	1220	Tropical zone	Eastern	warm/semiarid	erect	white	semi compact	103.67	278.3
SB18	241289	Oromiya	09-11-36-N	40-39-34-E	1430	Tropical zone	Eastern	warm/semiarid	erect	light yellow	compact	118.33	280.4
SB19	241689	Oromiya	07-17-29-N	38-22-98-E	1490	Tropical zone	Eastern	warm/semiarid	erect	light yellow	compact	108.93	305.1
SB20	9142	Oromiya	09-23-58-N	41-16-55-E	1626	Tropical zone	Eastern	warm/semiarid	bent	white	compact	117.6	292
SB21	27900	Gambella	07-15-89-N	35-13-50-E	1006	Tropical zone	Western	warm/semiarid	bent	light brown	loose	104.13	291.7
SB22	238434	Amhara	12-09-00-N	38-06-00-E	2100	Subtropical zone	Northern	cool/Semiarid	erect	yellow	semi loose	117.33	278
SB23	239196	Amhara	10-58-17-N	39-46-40-E	1580	Tropical zone	Northern	cool/subhumid	bent	yellow	compact	102.53	307.5
SB24	239214	Amhara	10-21-09-N	39-56-72-E	1420	Tropical zone	Northern	cool/subhumid	erect	light brown	compact	100.7	263.5

## Sheet: Sheet2
Peduncle Shape	Seed color	panicl density	Days to flowering	Plant height
1	1	1	93.17	185.67					red1
1	2	2	104.33	289.7					wh2
1	3	1	90.17	261.7					ye3		semilos1
1	4	3	99.33	338.3					br4		semicom2
2	2	2	95.57	215.8							los3
1	3	2	99.13	222.1							comp4
1	1	1	104.6	264.3
1	3	4	93.63	248.3
1	1	4	92.93	207.5
1	3	4	112.63	228.9
2	2	4	112.67	311.7
2	2	4	105.63	250.83
1	4	2	101.1	277
2	4	4	111.9	297.2
2	4	1	100.43	151.67
2	1	4	103.67	281
2	2	2	103.67	278.3
2	3	4	118.33	280.4
2	3	4	108.93	305.1
1	2	4	117.6	292
1	4	3	104.13	291.7
2	3	1	117.33	278
1	3	4	102.53	307.5
2	4	4	100.7	263.5
