# Supplementary material for: Genetic Diversity and Population Structure of Sorghum [Sorghum Bicolor (L.) Moench] Accessions as Revealed by Single Nucleotide Polymorphism Markers
Source: Front Plant Sci. 2022 Jan 5;12:799482. doi: 10.3389/fpls.2021.799482 (PMC8766336; doi:10.3389/fpls.2021.799482)
Supplement: Supplementary file 7 [file Table_2.XLSX]

## Sheet: Sheet1
Supplementary Table 2: List of the 5000 SNPs used for genotyping the sorghum sorghumgenotypes using SeqSNP method
Yellow highlighted SNPs in column A are missense mutations
Blue highlighted SNPs in column A are mutations other than missense mutations (include 3' UTR variant, 5' UTR variant, 5' UTR premature start codon gain variant, splice region variant, Start Lost, Stop gained, Synonymous variant
Orange highlighted SNPs in column B are SNPs within genes with known functions generated through aligning the gene sequence to the reference genome.
SNP_id	Chromosome	SNP position in the chromosome	Reference allele	Alternate allele
snp_sb001000002529	1	1495025	G	T
snp_sb001000002532	1	1495213	C	T
snp_sb001000002557	1	1526093	T	G
snp_sb001000003033	1	1803311	C	G
snp_sb001000003676	1	2253732	C	A
snp_sb001000004256	1	2621008	C	T
snp_sb001000005811	1	3485877	G	C
snp_sb001000005961	1	3752308	C	G
snp_sb001000006460	1	4115373	C	T
snp_sb001000006852	1	4412676	A	T
snp_sb001000007051	1	4994136	G	A
snp_sb001000007801	1	5361249	T	G
snp_sb001000008148	1	5727754	T	A
snp_sb001000010351	1	6775722	A	G
snp_sb001000011108	1	7157302	C	A
snp_sb001000014244	1	8672693	G	T
snp_sb001000014533	1	8870319	C	G
snp_sb001000015314	1	9412963	G	A
snp_sb001000016319	1	9953052	G	C
snp_sb001000017319	1	10564903	G	A
snp_sb001000019240	1	11390747	G	T
snp_sb001000019595	1	11587066	G	T
snp_sb001000020660	1	12169236	A	C
snp_sb001000020836	1	12263450	C	G
snp_sb001000020837	1	12263574	G	A
snp_sb001000020838	1	12263619	T	A
snp_sb001000020839	1	12263718	A	C
snp_sb001000020840	1	12263772	G	A
snp_sb001000020843	1	12263972	C	T
snp_sb001000020844	1	12264024	A	G
snp_sb001000020846	1	12264164	A	G
snp_sb001000020847	1	12265611	C	G
snp_sb001000022017	1	13039268	A	G
snp_sb001000022806	1	13536073	A	G
snp_sb001000026885	1	15636775	C	T
snp_sb001000027725	1	16405390	C	T
snp_sb001000030235	1	17745176	T	A
snp_sb001000031248	1	18160360	A	T
snp_sb001000032754	1	19047967	G	A
snp_sb001000034350	1	19680582	C	T
snp_sb001000034776	1	20053166	C	T
snp_sb001000040602	1	24769165	C	T
snp_sb001000041926	1	25582348	A	T
snp_sb001000042345	1	25827522	C	T
snp_sb001000044240	1	26782875	A	G
snp_sb001000046704	1	28072981	G	A
snp_sb001000047259	1	28479590	C	T
snp_sb001000051131	1	30455479	A	G
snp_sb001000071432	1	51628258	G	C
snp_sb001000072619	1	52350533	A	T
snp_sb001000074336	1	53115476	C	A
snp_sb001000075896	1	53766186	T	A
snp_sb001000076887	1	54113519	T	C
snp_sb001000080308	1	55294223	A	C
snp_sb001000080765	1	55469974	A	G
snp_sb001000081251	1	55674046	C	T
snp_sb001000083608	1	56520917	T	G
snp_sb001000084274	1	56777700	T	G
snp_sb001000084734	1	56994820	C	A
snp_sb001000086638	1	57851364	G	A
snp_sb001000088264	1	58373410	T	C
snp_sb001000091545	1	59685990	A	T
snp_sb001000092843	1	60717167	A	T
snp_sb001000095181	1	61974694	T	G
snp_sb001000096040	1	62433526	C	A
snp_sb001000097158	1	62855152	T	C
snp_sb001000098694	1	63340159	T	C
snp_sb001000099909	1	64084794	G	T
snp_sb001000100491	1	64388428	C	T
snp_sb001000101452	1	64881917	A	T
snp_sb001000102054	1	65197507	C	A
snp_sb001000102867	1	65669536	C	A
snp_sb001000103626	1	66111359	T	C
snp_sb001000104352	1	66574634	T	C
snp_sb001000105833	1	67268364	G	A
snp_sb001000107015	1	67845100	C	A
snp_sb001000110518	1	71747223	C	A
snp_sb001000111230	1	72170358	A	T
snp_sb001000111688	1	72488918	C	T
snp_sb001000112112	1	72766543	C	T
snp_sb001000113747	1	73616224	C	T
snp_sb001000114689	1	73968774	C	G
snp_sb001000116543	1	75063243	A	G
snp_sb001000117526	1	75789012	A	C
snp_sb001000118004	1	76173947	C	T
snp_sb001000118310	1	76370704	T	A
snp_sb001000118552	1	76688108	T	G
snp_sb001000119133	1	77250280	T	A
snp_sb001000120164	1	77879297	G	A
snp_sb001000122073	1	78930156	C	T
snp_sb001000125278	1	80446857	C	G
snp_sb039055825657	1	12243801	C	A
snp_sb039055825663	1	12245932	T	C
snp_sb039055825665	1	12247576	A	G
snp_sb039055825670	1	12248041	C	T
snp_sb040057635746	1	9982838	G	A
snp_sb040057635749	1	9984701	C	T
snp_sb040057635750	1	9985873	G	C
snp_sb040057637478	1	10668179	T	C
snp_sb042060170244	1	80269	T	C
snp_sb042060170277	1	121304	C	G
snp_sb042060170365	1	164858	C	A
snp_sb042060170527	1	253699	T	C
snp_sb042060170571	1	284222	G	T
snp_sb042060170723	1	360316	G	C
snp_sb042060170819	1	417535	T	C
snp_sb042060171868	1	1203876	A	G
snp_sb042060172246	1	1302330	C	T
snp_sb042060172343	1	1343819	A	C
snp_sb042060172453	1	1398366	G	C
snp_sb042060172622	1	1478045	C	A
snp_sb042060172793	1	1509565	C	T
snp_sb042060172896	1	1562902	G	C
snp_sb042060173087	1	1647523	G	T
snp_sb042060173216	1	1852334	T	C
snp_sb042060173248	1	1935434	C	A
snp_sb042060173295	1	1971773	C	T
snp_sb042060173350	1	2036942	T	C
snp_sb042060173655	1	2187993	T	C
snp_sb042060173702	1	2249739	G	T
snp_sb042060173732	1	2258504	C	G
snp_sb042060173803	1	2294937	G	T
snp_sb042060173974	1	2361901	C	A
snp_sb042060174023	1	2392735	G	C
snp_sb042060174029	1	2403639	G	T
snp_sb042060174355	1	3050878	A	G
snp_sb042060174391	1	3079324	C	T
snp_sb042060174414	1	3109112	A	T
snp_sb042060174487	1	3146054	G	T
snp_sb042060174770	1	3362949	T	C
snp_sb042060174996	1	3602894	T	G
snp_sb042060175521	1	3881642	C	G
snp_sb042060176625	1	4701685	T	C
snp_sb042060176666	1	4711478	T	C
snp_sb042060176733	1	4778713	G	A
snp_sb042060176806	1	4833570	C	T
snp_sb042060176865	1	4872113	G	A
snp_sb042060177176	1	5064792	G	A
snp_sb042060177747	1	5705669	C	A
snp_sb042060177833	1	5736900	G	T
snp_sb042060178085	1	5916421	C	G
snp_sb042060178104	1	5946086	A	G
snp_sb042060178668	1	6242806	T	C
snp_sb042060178720	1	6260483	A	G
snp_sb042060178801	1	6294763	T	C
snp_sb042060178865	1	6316903	C	A
snp_sb042060179249	1	6414464	T	C
snp_sb042060179291	1	6451589	T	C
snp_sb042060179410	1	6515109	G	T
snp_sb042060179566	1	6566791	G	A
snp_sb042060179810	1	6662830	G	A
snp_sb042060179975	1	6707475	C	A
snp_sb042060180030	1	6744521	G	A
snp_sb042060180171	1	6832647	C	T
snp_sb042060180256	1	6881895	T	G
snp_sb042060180344	1	6905415	C	G
snp_sb042060180443	1	6955114	G	A
snp_sb042060180493	1	7017253	A	C
snp_sb042060180531	1	7060395	C	T
snp_sb042060180609	1	7085969	C	A
snp_sb042060180666	1	7119210	G	C
snp_sb042060180758	1	7165155	T	G
snp_sb042060180812	1	7202511	C	G
snp_sb042060180883	1	7258826	G	A
snp_sb042060180967	1	7289395	T	C
snp_sb042060181018	1	7313173	A	C
snp_sb042060181257	1	7384309	G	A
snp_sb042060181608	1	7485522	T	G
snp_sb042060181854	1	7572223	A	G
snp_sb042060181955	1	7620475	G	A
snp_sb042060182100	1	7656193	A	T
snp_sb042060182505	1	7780651	G	C
snp_sb042060182732	1	7852727	G	A
snp_sb042060182790	1	7889037	G	A
snp_sb042060182853	1	7934435	G	T
snp_sb042060182929	1	7970448	G	A
snp_sb042060183025	1	8023618	T	C
snp_sb042060183033	1	8034619	C	T
snp_sb042060184103	1	9022825	T	G
snp_sb042060184206	1	9061390	G	T
snp_sb042060184357	1	9192259	T	C
snp_sb042060184501	1	9280997	C	T
snp_sb042060184571	1	9291528	T	C
snp_sb042060184939	1	9588274	A	G
snp_sb042060185204	1	9833936	G	T
snp_sb042060185289	1	9863226	G	T
snp_sb042060185360	1	9876302	A	C
snp_sb042060185766	1	10255146	A	C
snp_sb042060185820	1	10303387	C	T
snp_sb042060185927	1	10356830	C	G
snp_sb042060186217	1	10482182	G	C
snp_sb042060186269	1	10526409	C	A
snp_sb042060186340	1	10575998	C	A
snp_sb042060186646	1	10635069	G	A
snp_sb042060186818	1	10679007	C	T
snp_sb042060194129	1	15704711	A	C
snp_sb042060194164	1	15780249	A	G
snp_sb042060194437	1	15919981	A	G
snp_sb042060194721	1	16440125	C	T
snp_sb042060195009	1	16640928	G	A
snp_sb042060195494	1	16842099	A	G
snp_sb042060195627	1	16919477	A	T
snp_sb042060195680	1	17073083	G	A
snp_sb042060196385	1	18104898	T	C
snp_sb042060196448	1	18115584	C	G
snp_sb042060196485	1	18136047	C	T
snp_sb042060201438	1	21499485	C	A
snp_sb042060202813	1	22188395	A	G
snp_sb042060202875	1	22228060	T	C
snp_sb042060202934	1	22267955	G	A
snp_sb042060203040	1	22337538	C	T
snp_sb042060203273	1	22435573	C	A
snp_sb042060204637	1	24743434	A	C
snp_sb042060204795	1	24806129	A	G
snp_sb042060205388	1	25021442	C	T
snp_sb042060205411	1	25033782	C	T
snp_sb042060205452	1	25077065	G	C
snp_sb042060205511	1	25116999	G	T
snp_sb042060207055	1	25896525	A	C
snp_sb042060232392	1	52829634	G	C
snp_sb042060233107	1	53056967	A	G
snp_sb042060233305	1	53114756	C	T
snp_sb042060233583	1	53161286	T	A
snp_sb042060233615	1	53182633	C	T
snp_sb042060233820	1	53456591	C	G
snp_sb042060233866	1	53476405	G	A
snp_sb042060235203	1	53806422	G	C
snp_sb042060236104	1	54033341	G	C
snp_sb042060236233	1	54117245	A	G
snp_sb042060236353	1	54139527	T	C
snp_sb042060236541	1	54210457	T	C
snp_sb042060236620	1	54248925	G	C
snp_sb042060237623	1	54616643	A	T
snp_sb042060238263	1	54921860	T	A
snp_sb042060238285	1	54943613	G	T
snp_sb042060239393	1	55373083	A	T
snp_sb042060239675	1	55470653	G	C
snp_sb042060239858	1	55517192	G	C
snp_sb042060240004	1	55564261	T	G
snp_sb042060240132	1	55612902	C	T
snp_sb042060240156	1	55636073	C	A
snp_sb042060240255	1	55675708	G	T
snp_sb042060245367	1	58011825	G	T
snp_sb042060245567	1	58087460	C	G
snp_sb042060246020	1	58201059	A	G
snp_sb042060246412	1	58377437	G	A
snp_sb042060246524	1	58415199	C	A
snp_sb042060246601	1	58466210	C	G
snp_sb042060246692	1	58491881	C	A
snp_sb042060247227	1	58644236	T	C
snp_sb042060247457	1	58962762	C	T
snp_sb042060247548	1	58988830	T	G
snp_sb042060247601	1	59004623	T	C
snp_sb042060247964	1	59152625	C	G
snp_sb042060248433	1	59345665	T	A
snp_sb042060248679	1	59392861	A	T
snp_sb042060248804	1	59422691	A	C
snp_sb042060248948	1	59450758	G	A
snp_sb042060249132	1	59565953	T	C
snp_sb042060250437	1	60413119	G	A
snp_sb042060254155	1	62167938	A	C
snp_sb042060254253	1	62238536	T	G
snp_sb042060254341	1	62288107	A	C
snp_sb042060254517	1	62350265	G	C
snp_sb042060254617	1	62398381	C	G
snp_sb042060254886	1	62536074	C	A
snp_sb042060255002	1	62607866	G	A
snp_sb042060255073	1	62637237	G	T
snp_sb042060255108	1	62662440	C	G
snp_sb042060255203	1	62698528	C	A
snp_sb042060255360	1	62771823	G	T
snp_sb042060255450	1	62799480	A	G
snp_sb042060255790	1	62925111	A	T
snp_sb042060259362	1	65826456	A	T
snp_sb042060259363	1	65826906	A	G
snp_sb042060260112	1	66258089	T	C
snp_sb042060260697	1	67217203	T	C
snp_sb042060260755	1	67246556	C	T
snp_sb042060261112	1	67702151	A	G
snp_sb042060261157	1	67745541	C	T
snp_sb042060261856	1	69873616	G	A
snp_sb042060261937	1	69920595	A	G
snp_sb042060261993	1	69962903	G	T
snp_sb042060262149	1	70014301	A	G
snp_sb042060262173	1	70025119	C	T
snp_sb042060262299	1	70220168	C	T
snp_sb042060262596	1	70575352	T	C
snp_sb042060262952	1	70941732	C	T
snp_sb042060264701	1	72881570	C	A
snp_sb042060264709	1	72881995	C	T
snp_sb042060264710	1	72882155	C	A
snp_sb042060264711	1	72882451	G	A
snp_sb042060264715	1	72883793	T	C
snp_sb042060264720	1	72884225	G	A
snp_sb042060264721	1	72884373	G	T
snp_sb042060266097	1	73501115	G	C
snp_sb042060266478	1	73608526	A	C
snp_sb042060266647	1	73655525	A	T
snp_sb042060266939	1	73690076	G	A
snp_sb042060267164	1	73737253	A	G
snp_sb042060267285	1	73774042	T	C
snp_sb042060267394	1	73825294	C	G
snp_sb042060267705	1	73902359	G	T
snp_sb042060267791	1	73918997	G	A
snp_sb042060267857	1	73995120	C	A
snp_sb042060267941	1	74060901	T	C
snp_sb042060268227	1	74258351	C	T
snp_sb042060268378	1	74313372	A	G
snp_sb042060268529	1	74378771	C	A
snp_sb042060268638	1	74465163	G	C
snp_sb042060272628	1	77183794	T	A
snp_sb042060272768	1	77210206	A	G
snp_sb042060272909	1	77250033	C	G
snp_sb042060273269	1	77432019	A	G
snp_sb042060273487	1	77664345	A	C
snp_sb042060273572	1	77722457	T	A
snp_sb042060273647	1	77743487	G	A
snp_sb042060273759	1	77774160	G	A
snp_sb042060273909	1	77865263	G	T
snp_sb042060274031	1	77961825	T	A
snp_sb042060274055	1	77972193	A	G
snp_sb042060274223	1	78063951	G	A
snp_sb042060274231	1	78074421	T	C
snp_sb042060274591	1	78234227	G	C
snp_sb042060274617	1	78277352	C	T
snp_sb042060274619	1	78279622	T	C
snp_sb042060274656	1	78319783	A	G
snp_sb042060275013	1	78611114	T	C
snp_sb042060275152	1	78678630	A	G
snp_sb042060275296	1	78724636	A	G
snp_sb042060275320	1	78737416	T	C
snp_sb042060275476	1	78851191	G	A
snp_sb042060275489	1	78861351	C	G
snp_sb042060275536	1	78907500	G	A
snp_sb042060275625	1	78927289	C	G
snp_sb042060275698	1	78936866	G	T
snp_sb042060275751	1	78959145	T	C
snp_sb042060275848	1	79039188	C	G
snp_sb042060275961	1	79102367	A	T
snp_sb042060276438	1	79262453	T	C
snp_sb042060276494	1	79288390	G	A
snp_sb042060276614	1	79376571	C	A
snp_sb042060276620	1	79376786	T	G
snp_sb042060276621	1	79376877	T	C
snp_sb042060276622	1	79377316	A	C
snp_sb042060276623	1	79379152	C	T
snp_sb042060276624	1	79379219	T	A
snp_sb042060276777	1	79413390	G	T
snp_sb042060276865	1	79440581	G	C
snp_sb042060276951	1	79483144	C	T
snp_sb042060277393	1	79853406	G	C
snp_sb042060277454	1	79877374	A	G
snp_sb042060277758	1	79986749	C	T
snp_sb042060277905	1	80023526	C	T
snp_sb042060277965	1	80059542	C	T
snp_sb042060278255	1	80378776	A	C
snp_sb043061192543	1	12547685	T	C
snp_sb043061273536	1	56892013	A	T
snp_sb043061305266	1	67538478	C	T
snp_sb043061309034	1	69447237	G	A
snp_sb043061309036	1	69448017	G	T
snp_sb043061309038	1	69449027	T	C
snp_sb043061309039	1	69449197	G	C
snp_sb043061309040	1	69450725	G	A
snp_sb043061309049	1	69451179	T	G
snp_sb043061310046	1	69853493	A	T
snp_sb043061310048	1	69854737	A	G
snp_sb043061310049	1	69855991	G	A
snp_sb043061310051	1	69857983	C	G
snp_sb042060185636	1	10161968	T	C
snp_sb042060186045	1	10392442	G	A
snp_sb042060186390	1	10594548	A	T
snp_sb042060186653	1	10635448	T	C
snp_sb001000019705	1	11657952	A	T
snp_sb042060171964	1	1219779	G	A
snp_sb042060172071	1	1242968	G	A
snp_sb001000023505	1	13999690	T	A
snp_sb042060172628	1	1478297	T	C
snp_sb042060193744	1	15460279	G	A
snp_sb001000027025	1	15704959	C	A
snp_sb042060194354	1	15880060	A	G
snp_sb001000027727	1	16405537	T	A
snp_sb042060194557	1	16408170	A	T
snp_sb042060194617	1	16414777	G	A
snp_sb042060195017	1	16641334	G	T
snp_sb042060195031	1	16642434	T	C
snp_sb042060195345	1	16669897	A	C
snp_sb001000028649	1	16710395	G	A
snp_sb042060173189	1	1779703	A	C
snp_sb001000003043	1	1803552	A	G
snp_sb042060196388	1	18105318	G	A
snp_sb001000033149	1	19188885	C	T
snp_sb042060173374	1	2053226	T	C
snp_sb042060201501	1	21503274	C	T
snp_sb042060202405	1	22052482	A	G
snp_sb042060202815	1	22189235	A	G
snp_sb042060202992	1	22275540	G	T
snp_sb042060173871	1	2314299	A	G
snp_sb042060174034	1	2410580	T	A
snp_sb001000041157	1	24878133	T	C
snp_sb042060205393	1	25022383	G	C
snp_sb042060206252	1	25491635	C	T
snp_sb042060207342	1	26009809	T	G
snp_sb001000004455	1	2740995	T	A
snp_sb042060170640	1	301154	G	C
snp_sb042060174446	1	3128678	G	A
snp_sb042060174651	1	3279528	A	T
snp_sb042060174722	1	3318438	G	A
snp_sb042060175032	1	3654266	G	A
snp_sb042060175160	1	3719410	G	A
snp_sb042060175427	1	3754895	C	A
snp_sb042060175808	1	3976313	G	T
snp_sb042060176498	1	4583054	T	G
snp_sb042060177238	1	5073279	A	T
snp_sb042060232636	1	52903009	A	G
snp_sb042060233313	1	53115151	T	C
snp_sb042060235745	1	53933442	C	T
snp_sb001000076933	1	54124892	A	T
snp_sb042060236959	1	54392302	A	G
snp_sb042060177584	1	5450030	A	G
snp_sb042060177600	1	5452267	A	C
snp_sb042060177617	1	5454070	A	G
snp_sb042060238689	1	55049722	C	T
snp_sb042060239401	1	55379784	C	T
snp_sb042060240489	1	55830140	G	T
snp_sb042060177767	1	5708107	C	G
snp_sb042060245574	1	58095617	A	G
snp_sb042060246603	1	58467956	T	A
snp_sb042060178004	1	5871126	T	C
snp_sb001000089522	1	58964275	T	C
snp_sb042060247736	1	59025530	G	A
snp_sb042060248436	1	59347255	A	G
snp_sb042060248744	1	59397766	A	G
snp_sb042060249011	1	59477096	T	A
snp_sb042060250219	1	60156573	T	G
snp_sb042060250733	1	60655301	C	A
snp_sb042060250790	1	60677666	A	G
snp_sb042060178275	1	6151385	A	C
snp_sb042060254259	1	62244177	G	A
snp_sb042060254518	1	62351281	T	C
snp_sb042060254696	1	62418756	T	A
snp_sb042060178745	1	6263850	C	A
snp_sb042060255385	1	62783559	T	C
snp_sb042060255499	1	62816661	A	G
snp_sb042060255599	1	62865288	C	T
snp_sb042060255832	1	62933949	A	T
snp_sb042060255938	1	62958684	A	T
snp_sb042060178980	1	6329784	G	A
snp_sb042060179292	1	6452126	A	G
snp_sb042060179455	1	6529410	G	T
snp_sb042060259876	1	66114022	C	G
snp_sb042060260091	1	66234106	G	A
snp_sb042060260358	1	66382429	A	T
snp_sb042060179979	1	6710714	A	C
snp_sb042060179997	1	6716426	C	T
snp_sb042060260899	1	67398568	G	A
snp_sb042060261162	1	67753700	G	C
snp_sb042060180175	1	6837866	T	C
snp_sb042060180229	1	6855502	T	C
snp_sb042060180404	1	6934843	A	G
snp_sb042060262120	1	70001957	C	T
snp_sb042060262205	1	70037726	A	T
snp_sb042060262237	1	70055642	G	C
snp_sb042060262374	1	70225030	A	G
snp_sb042060262711	1	70874870	C	T
snp_sb001000110520	1	71747313	T	C
snp_sb001000111049	1	71997938	A	G
snp_sb042060180968	1	7289906	G	A
snp_sb042060266102	1	73501350	T	C
snp_sb042060266181	1	73518680	A	G
snp_sb042060266221	1	73524147	G	T
snp_sb042060266686	1	73658657	C	A
snp_sb042060267183	1	73740785	T	C
snp_sb042060267502	1	73844401	G	C
snp_sb042060267559	1	73855085	C	T
snp_sb042060181308	1	7389746	G	A
snp_sb042060267715	1	73903014	A	T
snp_sb042060267741	1	73905995	A	C
snp_sb042060267753	1	73907187	A	T
snp_sb042060267769	1	73908975	A	T
snp_sb042060268090	1	74187222	G	T
snp_sb042060181505	1	7443060	C	T
snp_sb042060181576	1	7462513	T	C
snp_sb042060181623	1	7493725	T	C
snp_sb001000012186	1	7568464	G	A
snp_sb001000117799	1	75970265	C	T
snp_sb001000012544	1	7664469	A	G
snp_sb042060272629	1	77183911	T	G
snp_sb042060272913	1	77250378	A	G
snp_sb001000119161	1	77286159	G	A
snp_sb042060273650	1	77744466	C	G
snp_sb042060273915	1	77866046	A	G
snp_sb042060274422	1	78161599	A	T
snp_sb042060274847	1	78464288	A	G
snp_sb042060275153	1	78679745	A	T
snp_sb042060275303	1	78726211	C	T
snp_sb042060275565	1	78910046	C	A
snp_sb042060276625	1	79384837	G	T
snp_sb042060276993	1	79488559	C	A
snp_sb042060277352	1	79810522	C	T
snp_sb042060277394	1	79855237	T	A
snp_sb042060277765	1	79987098	A	G
snp_sb042060277967	1	80060912	A	G
snp_sb042060278017	1	80079213	T	G
snp_sb042060278178	1	80327270	A	G
snp_sb042060183039	1	8035341	A	C
snp_sb042060183185	1	8066218	G	A
snp_sb042060183702	1	8364297	G	A
snp_sb042060184215	1	9062575	G	C
snp_sb042060184250	1	9074513	G	C
snp_sb042060185193	1	9823472	G	A
snp_sb042060185325	1	9865162	T	A
snp_sb042060185372	1	9877470	T	A
snp_sb042060185446	1	9885015	A	C
snp_sb042060185552	1	9917985	G	T
snp_sb042060185768	1	10255276	T	C
snp_sb042060193829	1	15595942	T	G
snp_sb042060195431	1	16802952	T	G
snp_sb042060203078	1	22344440	A	T
snp_sb042060174448	1	3129037	A	C
snp_sb042060232637	1	52905292	G	T
snp_sb042060239864	1	55517368	G	T
snp_sb042060248748	1	59398180	C	T
snp_sb042060255111	1	62662852	G	A
snp_sb042060259890	1	66125621	A	T
snp_sb042060261609	1	69403134	T	C
snp_sb042060266106	1	73501499	T	C
snp_sb042060181335	1	7390629	G	A
snp_sb042060182190	1	7665299	T	A
snp_sb042060275305	1	78726493	G	T
snp_sb042060278180	1	80331205	G	T
snp_sb042060185448	1	9885118	G	A
snp_sb001000144922	2	9783291	G	T
snp_sb001000144923	2	9784228	A	T
snp_sb001000144925	2	9784423	C	T
snp_sb001000144926	2	9790467	T	A
snp_sb001000144928	2	9792621	A	G
snp_sb042060278717	2	585797	A	T
snp_sb042060278725	2	606589	G	A
snp_sb042060278766	2	654577	A	G
snp_sb042060278775	2	655540	T	C
snp_sb042060278784	2	665354	C	G
snp_sb042060278798	2	677092	A	G
snp_sb042060279118	2	1059732	G	A
snp_sb042060279323	2	1163144	T	C
snp_sb042060279387	2	1378487	A	G
snp_sb042060279461	2	1432177	T	G
snp_sb042060279612	2	1537554	C	T
snp_sb042060280192	2	2006439	A	G
snp_sb042060280218	2	2080359	A	C
snp_sb042060280335	2	2147752	G	C
snp_sb042060280632	2	2315735	G	A
snp_sb042060280698	2	2341745	A	T
snp_sb042060280920	2	2514025	A	G
snp_sb042060281069	2	2576038	T	C
snp_sb042060281365	2	2673567	A	T
snp_sb042060281413	2	2688057	A	G
snp_sb042060281524	2	2747435	G	C
snp_sb042060281773	2	3000528	T	C
snp_sb042060281797	2	3075411	C	A
snp_sb042060282152	2	3265922	G	C
snp_sb042060282552	2	3427375	G	T
snp_sb042060283458	2	3762022	C	T
snp_sb042060283459	2	3764517	G	C
snp_sb042060283652	2	3889233	C	A
snp_sb042060283721	2	3925818	G	T
snp_sb042060284043	2	4007212	A	C
snp_sb042060284170	2	4040808	T	C
snp_sb042060284221	2	4085315	C	A
snp_sb042060284235	2	4098822	T	C
snp_sb042060284674	2	4419867	G	C
snp_sb042060284890	2	4481899	C	T
snp_sb042060285094	2	4514966	G	C
snp_sb042060285238	2	4561670	A	G
snp_sb042060285289	2	4591297	G	C
snp_sb042060285302	2	4592823	T	C
snp_sb042060285398	2	4633889	G	A
snp_sb042060285654	2	4725879	T	G
snp_sb042060285727	2	4751030	A	G
snp_sb042060285731	2	4751080	C	G
snp_sb042060285826	2	4784636	C	T
snp_sb042060285905	2	4814130	G	A
snp_sb042060286043	2	4921236	C	G
snp_sb042060286063	2	4935079	T	A
snp_sb042060286213	2	4967260	T	C
snp_sb042060286395	2	5306091	A	T
snp_sb042060286632	2	5388908	C	T
snp_sb042060287054	2	5573976	C	T
snp_sb042060287199	2	5625343	T	A
snp_sb042060287519	2	5755600	A	G
snp_sb042060287588	2	5786441	A	G
snp_sb042060287881	2	5834841	G	C
snp_sb042060287882	2	5836461	T	C
snp_sb042060287884	2	5838445	T	C
snp_sb042060287899	2	5849605	C	G
snp_sb042060287944	2	5870514	A	G
snp_sb042060287998	2	5884277	C	T
snp_sb042060288018	2	5896076	T	C
snp_sb042060288028	2	5906958	G	A
snp_sb042060288507	2	6114578	T	C
snp_sb042060288603	2	6139987	G	A
snp_sb042060288706	2	6203646	A	G
snp_sb042060288840	2	6394806	C	T
snp_sb042060288956	2	6456931	C	T
snp_sb042060289137	2	6522540	T	C
snp_sb042060289219	2	6554234	G	A
snp_sb042060289918	2	6684501	T	A
snp_sb042060289998	2	6733315	G	A
snp_sb042060290634	2	6954924	G	C
snp_sb042060290933	2	7054402	T	C
snp_sb042060291025	2	7091439	T	C
snp_sb042060291094	2	7105744	C	A
snp_sb042060291174	2	7116719	A	G
snp_sb042060291465	2	7224596	A	C
snp_sb042060291466	2	7227169	T	A
snp_sb042060291470	2	7233461	C	T
snp_sb042060291471	2	7234398	T	C
snp_sb042060291472	2	7238379	T	C
snp_sb042060291473	2	7239074	A	G
snp_sb042060291474	2	7239888	G	A
snp_sb042060291475	2	7240121	G	A
snp_sb042060291494	2	7250391	C	T
snp_sb042060291562	2	7288232	G	A
snp_sb042060291576	2	7308599	C	G
snp_sb042060291597	2	7328662	A	G
snp_sb042060291618	2	7350785	G	C
snp_sb042060291805	2	7427751	T	G
snp_sb042060292456	2	7685778	T	G
snp_sb042060292775	2	7762842	C	G
snp_sb042060293179	2	7880091	C	T
snp_sb042060293429	2	7983795	T	G
snp_sb042060293578	2	8047567	A	G
snp_sb042060293603	2	8054473	T	G
snp_sb042060293617	2	8059088	T	C
snp_sb042060293672	2	8091709	T	C
snp_sb042060293772	2	8132583	C	A
snp_sb042060293909	2	8209275	C	T
snp_sb042060294615	2	8423514	A	G
snp_sb042060294719	2	8451281	G	A
snp_sb042060295487	2	9013718	T	C
snp_sb042060295585	2	9076820	A	T
snp_sb042060295587	2	9079174	A	G
snp_sb042060295693	2	9134538	G	C
snp_sb042060296067	2	9400420	G	A
snp_sb042060296131	2	9425036	G	C
snp_sb042060296372	2	9482185	C	A
snp_sb042060296638	2	9542396	C	T
snp_sb042060296658	2	9552968	G	A
snp_sb042060296753	2	9578598	C	G
snp_sb042060296757	2	9590864	C	T
snp_sb042060297268	2	9725990	C	T
snp_sb042060297414	2	9777484	A	T
snp_sb042060297656	2	9849767	A	G
snp_sb042060297887	2	9988481	A	G
snp_sb042060297902	2	9993044	G	C
snp_sb042060298496	2	10223188	G	T
snp_sb042060298497	2	10223358	G	T
snp_sb042060298656	2	10262649	C	A
snp_sb042060298702	2	10291088	A	G
snp_sb042060298767	2	10307848	C	T
snp_sb042060299184	2	10485898	C	A
snp_sb042060299364	2	10524022	A	C
snp_sb042060299606	2	10585501	A	G
snp_sb042060299660	2	10605704	G	A
snp_sb042060299715	2	10615252	A	T
snp_sb042060299716	2	10615326	A	G
snp_sb042060300241	2	11078046	A	G
snp_sb042060300249	2	11078661	C	T
snp_sb042060300250	2	11078741	T	G
snp_sb042060300460	2	11100976	C	G
snp_sb042060300681	2	11144968	C	G
snp_sb042060300772	2	11183207	T	C
snp_sb042060301294	2	11460995	T	C
snp_sb042060301827	2	12165292	C	A
snp_sb042060302008	2	12243572	A	C
snp_sb042060302131	2	12350491	C	T
snp_sb042060302269	2	12410881	G	A
snp_sb042060302278	2	12412973	G	T
snp_sb042060302919	2	12676421	A	T
snp_sb042060303065	2	12721870	G	A
snp_sb042060303104	2	12733609	C	G
snp_sb042060303997	2	13035898	C	T
snp_sb042060304103	2	13076938	T	C
snp_sb042060304434	2	13177574	C	T
snp_sb042060304638	2	13293723	G	C
snp_sb042060304978	2	13670976	C	G
snp_sb042060305069	2	13722011	C	G
snp_sb042060305322	2	13834799	T	G
snp_sb042060305850	2	14265018	G	A
snp_sb042060306027	2	14359813	G	A
snp_sb042060306290	2	14473831	A	G
snp_sb042060306327	2	14484441	G	T
snp_sb042060306417	2	14527197	A	G
snp_sb042060306633	2	14627564	G	A
snp_sb042060306690	2	14657046	T	C
snp_sb042060306823	2	14747345	G	C
snp_sb042060306873	2	14775976	G	A
snp_sb042060307349	2	14976180	C	T
snp_sb042060307609	2	15100507	A	G
snp_sb042060307669	2	15126839	C	T
snp_sb042060307671	2	15127348	A	G
snp_sb042060307779	2	15164055	G	T
snp_sb042060307849	2	15191027	T	C
snp_sb042060310108	2	16036909	A	T
snp_sb042060310274	2	16113896	G	T
snp_sb042060310772	2	16391826	A	G
snp_sb042060310867	2	16410325	G	T
snp_sb042060310963	2	16423794	A	C
snp_sb042060311033	2	16480915	C	G
snp_sb042060311036	2	16481207	T	G
snp_sb042060311112	2	16544575	C	T
snp_sb042060311379	2	16649452	G	A
snp_sb042060313664	2	18570439	G	A
snp_sb042060314213	2	18699083	A	G
snp_sb042060314349	2	18760674	T	C
snp_sb042060314453	2	18810776	T	C
snp_sb042060314757	2	18920990	T	C
snp_sb042060315133	2	18993965	A	G
snp_sb042060315134	2	18994368	C	T
snp_sb042060315561	2	19168012	C	G
snp_sb042060317287	2	19785761	T	C
snp_sb042060317439	2	19828910	G	T
snp_sb042060317949	2	20020771	T	C
snp_sb042060318012	2	20075299	G	T
snp_sb042060318260	2	20180674	A	G
snp_sb042060318996	2	20563177	C	T
snp_sb042060319005	2	20570555	C	T
snp_sb042060319006	2	20573567	A	T
snp_sb042060319007	2	20573773	A	G
snp_sb042060319284	2	20707531	G	A
snp_sb042060319439	2	20856568	A	G
snp_sb042060319554	2	20901560	A	G
snp_sb042060320336	2	21429050	A	T
snp_sb042060320337	2	21430190	C	T
snp_sb042060320991	2	21721128	T	C
snp_sb042060323419	2	23182313	C	A
snp_sb042060323474	2	23341884	G	A
snp_sb042060332392	2	47443745	A	T
snp_sb042060333618	2	51121885	A	T
snp_sb042060334327	2	51764695	T	G
snp_sb042060334699	2	51969907	C	G
snp_sb042060334864	2	52054412	A	T
snp_sb042060335018	2	52123469	C	T
snp_sb042060335548	2	52465000	T	A
snp_sb042060335831	2	52725645	C	A
snp_sb042060336746	2	54390613	T	A
snp_sb042060337718	2	54593504	C	A
snp_sb042060338441	2	55267623	T	C
snp_sb042060338643	2	55384926	C	T
snp_sb042060338845	2	55476983	T	G
snp_sb042060339135	2	55665363	C	T
snp_sb042060339228	2	55718564	A	G
snp_sb042060339359	2	55788578	G	T
snp_sb042060340206	2	56136783	A	G
snp_sb042060340451	2	56199774	A	G
snp_sb042060340581	2	56249507	G	C
snp_sb042060340638	2	56293676	C	T
snp_sb042060340754	2	56341054	T	A
snp_sb042060341062	2	56426380	A	C
snp_sb042060341101	2	56432425	C	T
snp_sb042060341126	2	56435486	C	T
snp_sb042060341425	2	56540028	G	T
snp_sb042060342071	2	56839049	T	C
snp_sb042060342191	2	56956319	C	G
snp_sb042060342418	2	57025872	G	T
snp_sb042060342538	2	57043645	T	G
snp_sb042060342849	2	57143126	G	A
snp_sb042060342893	2	57166047	G	C
snp_sb042060343056	2	57253297	A	C
snp_sb042060343624	2	57465408	G	C
snp_sb042060343660	2	57499457	T	C
snp_sb042060343720	2	57523267	G	A
snp_sb042060344169	2	57835616	G	A
snp_sb042060344242	2	57964291	A	G
snp_sb042060344283	2	58010749	C	A
snp_sb042060344876	2	58352562	G	A
snp_sb042060344972	2	58404735	G	T
snp_sb042060345161	2	58453234	G	A
snp_sb042060345533	2	58652786	T	C
snp_sb042060345818	2	58832490	C	T
snp_sb042060345868	2	58860841	C	G
snp_sb042060346132	2	58956882	A	G
snp_sb042060346237	2	58996672	C	G
snp_sb042060346344	2	59042458	C	T
snp_sb042060346857	2	59310589	A	C
snp_sb042060347154	2	59440758	T	C
snp_sb042060347205	2	59452516	G	C
snp_sb042060347453	2	59534953	T	C
snp_sb042060347522	2	59566453	G	A
snp_sb042060347744	2	59698705	G	T
snp_sb042060347795	2	59753548	C	T
snp_sb042060347797	2	59755843	A	C
snp_sb042060347981	2	59810106	C	T
snp_sb042060348072	2	59863446	T	G
snp_sb042060348146	2	59907737	G	C
snp_sb042060348262	2	60105017	A	G
snp_sb042060348282	2	60161743	T	C
snp_sb042060348862	2	60374738	C	G
snp_sb042060348973	2	60384426	G	A
snp_sb042060349090	2	60408845	C	A
snp_sb042060349202	2	60415546	T	G
snp_sb042060349284	2	60450646	C	A
snp_sb042060349505	2	60492930	G	A
snp_sb042060349862	2	60679497	G	T
snp_sb042060350003	2	60722398	A	G
snp_sb042060350311	2	60875601	T	C
snp_sb042060350447	2	61003934	A	G
snp_sb042060350587	2	61017984	G	C
snp_sb042060350633	2	61090135	A	T
snp_sb042060350636	2	61090285	A	G
snp_sb042060351016	2	61434830	C	G
snp_sb042060351059	2	61433471	A	T
snp_sb042060351164	2	61518901	A	G
snp_sb042060351175	2	61589797	C	G
snp_sb042060351339	2	61785599	C	G
snp_sb042060352162	2	62406373	T	G
snp_sb042060352250	2	62458735	T	G
snp_sb042060352338	2	62506582	A	T
snp_sb042060352632	2	62716064	C	T
snp_sb042060352713	2	62762349	G	A
snp_sb042060353010	2	62794637	A	T
snp_sb042060353017	2	62795250	G	C
snp_sb042060353049	2	62941229	G	A
snp_sb042060353241	2	63340941	A	G
snp_sb042060353459	2	64003944	A	G
snp_sb042060353476	2	64019304	A	G
snp_sb042060353745	2	64495840	T	C
snp_sb042060353793	2	64522908	T	A
snp_sb042060353801	2	64526500	C	T
snp_sb042060353825	2	64543644	G	T
snp_sb042060353964	2	64601875	T	G
snp_sb042060354135	2	64646426	G	T
snp_sb042060354267	2	64697914	A	G
snp_sb042060354343	2	64742787	A	G
snp_sb042060354353	2	64753542	T	A
snp_sb042060354354	2	64753826	T	C
snp_sb042060354355	2	64756277	T	C
snp_sb042060354434	2	64924115	T	C
snp_sb042060354744	2	66258968	C	T
snp_sb042060354931	2	66448740	C	T
snp_sb042060354944	2	66461822	G	A
snp_sb042060355037	2	66604649	A	G
snp_sb042060355081	2	66707059	G	A
snp_sb042060355220	2	66837918	A	C
snp_sb042060355252	2	66850830	T	G
snp_sb042060355519	2	66985736	G	A
snp_sb042060355820	2	67081989	T	C
snp_sb042060355894	2	67121362	T	C
snp_sb042060356057	2	67195459	G	C
snp_sb042060356101	2	67228788	C	A
snp_sb042060356157	2	67268522	C	T
snp_sb042060356270	2	67451670	G	T
snp_sb042060356421	2	67587065	T	G
snp_sb042060356865	2	67873020	A	G
snp_sb042060357029	2	68231221	T	C
snp_sb042060357167	2	68307604	T	C
snp_sb042060357168	2	68315642	T	G
snp_sb042060357230	2	68348063	G	A
snp_sb042060357288	2	68409008	G	A
snp_sb042060357408	2	68471283	G	A
snp_sb042060357702	2	68656016	A	C
snp_sb042060357917	2	68949789	C	G
snp_sb042060357964	2	68979373	G	C
snp_sb042060358103	2	69029976	G	A
snp_sb042060358260	2	69074428	C	T
snp_sb042060358456	2	69155197	G	C
snp_sb042060358697	2	69297722	T	G
snp_sb042060358711	2	69309355	G	A
snp_sb042060358929	2	69553623	A	C
snp_sb042060358990	2	69586319	A	G
snp_sb042060359819	2	70303907	G	A
snp_sb042060360080	2	70414181	A	C
snp_sb042060360942	2	71932158	T	C
snp_sb042060361080	2	73225797	T	C
snp_sb042060361204	2	73423682	G	T
snp_sb042060361856	2	73622733	G	A
snp_sb042060362036	2	74475070	C	T
snp_sb042060362313	2	74702679	C	G
snp_sb042060362534	2	75457157	T	C
snp_sb042060362583	2	75578221	G	A
snp_sb042060362673	2	75804441	G	C
snp_sb042060362896	2	75891954	T	C
snp_sb042060363157	2	75994759	G	C
snp_sb042060363513	2	76427071	T	C
snp_sb042060363644	2	76475272	G	C
snp_sb042060363776	2	76673317	C	G
snp_sb042060363872	2	76715878	C	T
snp_sb042060363903	2	76734948	G	A
snp_sb042060364056	2	76788530	T	C
snp_sb042060364357	2	77072030	A	G
snp_sb043061434025	2	58664283	T	C
snp_sb043061434026	2	58664925	T	A
snp_sb043061434027	2	58666649	A	G
snp_sb043061434030	2	58669156	C	T
snp_sb043061434031	2	58670554	T	A
snp_sb043061434043	2	58673686	G	A
snp_sb043061434049	2	58673855	C	T
snp_sb043061440761	2	60592260	C	T
snp_sb042060279054	2	1028568	G	A
snp_sb042060298916	2	10331508	A	G
snp_sb042060299137	2	10400456	C	T
snp_sb042060279121	2	1060409	C	G
snp_sb042060300344	2	11088790	G	A
snp_sb042060300463	2	11102072	T	A
snp_sb042060300684	2	11145866	A	G
snp_sb042060301316	2	11462860	A	G
snp_sb042060302150	2	12372504	C	G
snp_sb042060303245	2	12757616	C	G
snp_sb042060304001	2	13036238	A	C
snp_sb042060304968	2	13659531	G	A
snp_sb042060278625	2	140856	A	G
snp_sb042060306423	2	14531150	C	G
snp_sb042060279644	2	1573591	T	A
snp_sb042060279811	2	1612811	T	A
snp_sb042060311039	2	16482281	G	A
snp_sb042060313541	2	18524602	A	C
snp_sb042060313718	2	18573483	G	C
snp_sb042060314418	2	18781575	T	C
snp_sb042060314470	2	18811528	C	T
snp_sb042060314809	2	18946439	A	G
snp_sb042060317344	2	19789931	A	G
snp_sb042060319312	2	20709519	A	G
snp_sb042060319358	2	20713653	T	A
snp_sb042060319751	2	21219575	A	G
snp_sb042060280362	2	2158360	T	A
snp_sb042060280392	2	2174237	T	C
snp_sb042060321702	2	22139081	A	C
snp_sb042060323424	2	23185624	A	T
snp_sb042060281071	2	2576406	C	G
snp_sb042060281415	2	2688654	T	A
snp_sb042060281436	2	2693587	A	C
snp_sb042060281662	2	2780939	G	A
snp_sb042060283108	2	3707766	A	T
snp_sb042060283161	2	3726241	T	G
snp_sb042060283746	2	3927565	A	C
snp_sb042060284236	2	4100639	G	T
snp_sb042060285290	2	4591545	A	G
snp_sb042060285666	2	4726782	T	C
snp_sb042060332539	2	48027168	T	G
snp_sb042060333008	2	49574921	T	A
snp_sb042060334776	2	51993583	G	C
snp_sb042060286608	2	5388643	C	A
snp_sb042060336741	2	54390254	G	A
snp_sb042060337686	2	54582870	T	C
snp_sb042060338343	2	55213251	T	C
snp_sb042060338476	2	55292382	C	G
snp_sb042060339961	2	55956451	G	C
snp_sb042060340340	2	56163455	T	G
snp_sb042060340582	2	56250102	G	A
snp_sb042060340650	2	56299995	T	C
snp_sb042060341073	2	56427178	G	C
snp_sb042060287386	2	5689916	C	G
snp_sb042060342277	2	56976530	T	C
snp_sb042060287495	2	5722270	A	G
snp_sb042060343983	2	57743637	A	G
snp_sb042060287614	2	5787780	G	A
snp_sb042060344776	2	58288533	G	A
snp_sb042060287947	2	5870751	T	C
snp_sb042060288002	2	5885427	C	A
snp_sb042060346325	2	59030900	C	G
snp_sb042060347206	2	59452653	G	A
snp_sb042060347494	2	59552637	T	C
snp_sb042060347623	2	59611177	G	A
snp_sb042060348965	2	60383083	T	C
snp_sb042060349216	2	60416638	G	T
snp_sb042060349665	2	60530761	G	A
snp_sb042060349680	2	60542309	G	A
snp_sb042060349917	2	60688802	A	C
snp_sb042060288255	2	6070154	G	A
snp_sb042060350455	2	61004511	C	T
snp_sb042060350555	2	61014947	A	T
snp_sb042060351176	2	61590154	T	G
snp_sb042060351645	2	62057584	G	C
snp_sb042060351929	2	62331830	C	G
snp_sb042060352254	2	62462895	T	C
snp_sb042060352653	2	62723139	A	G
snp_sb042060353024	2	62795617	C	T
snp_sb042060288845	2	6403095	A	T
snp_sb042060353826	2	64543941	G	T
snp_sb042060353966	2	64604096	C	T
snp_sb042060289006	2	6468312	C	A
snp_sb042060289047	2	6477284	G	T
snp_sb042060354500	2	64929386	A	C
snp_sb042060289229	2	6557150	A	T
snp_sb042060289605	2	6608062	G	A
snp_sb042060289728	2	6615133	A	T
snp_sb042060354949	2	66465051	G	C
snp_sb042060355039	2	66604865	G	A
snp_sb042060355201	2	66827221	A	G
snp_sb042060355654	2	67040256	C	T
snp_sb042060355700	2	67051566	C	T
snp_sb042060355943	2	67128680	G	A
snp_sb042060356169	2	67273146	G	A
snp_sb042060356295	2	67455734	C	T
snp_sb042060356337	2	67471776	T	G
snp_sb042060357034	2	68232549	A	G
snp_sb042060357347	2	68413852	A	C
snp_sb042060357853	2	68919774	A	T
snp_sb042060357920	2	68950671	T	G
snp_sb042060358021	2	68993999	G	T
snp_sb042060358110	2	69031473	G	C
snp_sb042060358513	2	69179885	T	A
snp_sb042060359046	2	69840986	G	C
snp_sb042060359260	2	69961993	G	C
snp_sb042060290824	2	7012347	G	T
snp_sb042060290834	2	7013178	A	T
snp_sb042060359594	2	70229027	T	C
snp_sb042060359675	2	70249124	A	T
snp_sb042060359732	2	70270649	T	C
snp_sb042060359920	2	70337130	A	C
snp_sb042060360232	2	70456526	G	C
snp_sb042060360330	2	70496723	T	C
snp_sb042060291229	2	7120142	A	T
snp_sb042060291574	2	7295413	C	T
snp_sb042060361246	2	73434346	A	G
snp_sb042060361380	2	73501014	T	C
snp_sb042060361428	2	73506435	A	C
snp_sb042060361449	2	73507971	T	C
snp_sb042060361574	2	73522581	G	C
snp_sb042060362290	2	74692083	T	C
snp_sb042060362676	2	75804562	A	G
snp_sb042060362761	2	75838457	G	C
snp_sb042060363168	2	76006734	A	G
snp_sb042060363515	2	76427351	C	G
snp_sb042060363531	2	76433611	G	A
snp_sb042060364194	2	76852019	A	G
snp_sb042060292688	2	7748627	G	C
snp_sb042060293013	2	7828146	A	C
snp_sb042060294065	2	8276329	C	T
snp_sb042060295227	2	8906089	G	A
snp_sb042060295329	2	8950118	A	C
snp_sb042060296214	2	9442676	C	T
snp_sb042060296733	2	9575776	T	C
snp_sb042060297011	2	9663585	A	G
snp_sb042060297416	2	9777969	T	C
snp_sb042060297471	2	9793186	G	A
snp_sb042060297892	2	9989201	C	T
snp_sb042060299138	2	10400697	A	G
snp_sb042060305088	2	13742427	T	C
snp_sb042060314763	2	18921522	T	C
snp_sb042060280727	2	2349460	G	A
snp_sb042060285298	2	4591875	C	T
snp_sb042060338644	2	55385652	C	T
snp_sb042060287595	2	5786951	G	A
snp_sb042060348972	2	60384320	T	A
snp_sb042060351649	2	62059111	A	C
snp_sb042060289053	2	6477723	T	C
snp_sb042060355899	2	67121584	C	T
snp_sb042060358023	2	68994694	T	C
snp_sb042060290898	2	7029854	C	T
snp_sb042060361451	2	73508085	G	T
snp_sb042060292693	2	7748793	G	A
snp_sb042060297578	2	9813618	A	G
snp_sb001000329033	3	60681250	A	C
snp_sb042060364747	3	120241	G	A
snp_sb042060364807	3	163569	A	G
snp_sb042060364897	3	223392	A	C
snp_sb042060364957	3	246430	T	G
snp_sb042060365120	3	428037	C	T
snp_sb042060365193	3	542076	G	C
snp_sb042060365195	3	545337	G	A
snp_sb042060365356	3	601262	C	G
snp_sb042060365614	3	735239	C	G
snp_sb042060365758	3	799143	C	T
snp_sb042060365774	3	801674	C	T
snp_sb042060365833	3	886600	C	A
snp_sb042060365966	3	959030	T	C
snp_sb042060366051	3	1000840	G	T
snp_sb042060366173	3	1060676	C	T
snp_sb042060366265	3	1099300	G	A
snp_sb042060366474	3	1251741	G	C
snp_sb042060366503	3	1286695	G	A
snp_sb042060366597	3	1457177	C	G
snp_sb042060366602	3	1457490	A	G
snp_sb042060366603	3	1457554	G	A
snp_sb042060366798	3	1543387	A	G
snp_sb042060366862	3	1836417	T	C
snp_sb042060366918	3	1903996	A	G
snp_sb042060367078	3	1960808	G	C
snp_sb042060367121	3	2013860	C	T
snp_sb042060367165	3	2084347	G	C
snp_sb042060367286	3	2141659	T	G
snp_sb042060367294	3	2146515	G	A
snp_sb042060367338	3	2149493	T	A
snp_sb042060367704	3	2643187	G	A
snp_sb042060367794	3	2695335	G	A
snp_sb042060367820	3	2713688	A	G
snp_sb042060367879	3	2745957	C	T
snp_sb042060368008	3	2967817	T	G
snp_sb042060368253	3	3287974	C	T
snp_sb042060368319	3	3596709	C	T
snp_sb042060368413	3	3666254	T	A
snp_sb042060368808	3	3769682	A	G
snp_sb042060369004	3	3860807	T	G
snp_sb042060369109	3	3902411	A	G
snp_sb042060369279	3	3941363	G	A
snp_sb042060369804	3	4826572	T	C
snp_sb042060369922	3	4891568	C	T
snp_sb042060370031	3	4949340	C	G
snp_sb042060370087	3	5001434	A	G
snp_sb042060370360	3	5111955	C	T
snp_sb042060370420	3	5172819	A	C
snp_sb042060370633	3	5244497	G	A
snp_sb042060370702	3	5391900	T	G
snp_sb042060370816	3	5440766	A	G
snp_sb042060370968	3	5535752	T	C
snp_sb042060371143	3	5617005	G	C
snp_sb042060371227	3	5677266	G	T
snp_sb042060371274	3	5786075	G	T
snp_sb042060371275	3	5787297	C	T
snp_sb042060371531	3	5873421	T	G
snp_sb042060371818	3	6263353	A	G
snp_sb042060372193	3	6324453	C	A
snp_sb042060372334	3	6369560	A	G
snp_sb042060372374	3	6373569	C	T
snp_sb042060372459	3	6476342	T	C
snp_sb042060372740	3	6735083	A	C
snp_sb042060372935	3	6833991	A	C
snp_sb042060373111	3	6927932	C	T
snp_sb042060373307	3	6984385	C	T
snp_sb042060373397	3	7009305	G	A
snp_sb042060373402	3	7010395	C	A
snp_sb042060373426	3	7019487	C	T
snp_sb042060373843	3	7197690	T	C
snp_sb042060373854	3	7204011	G	A
snp_sb042060374389	3	7498439	G	C
snp_sb042060374475	3	7551664	G	C
snp_sb042060374576	3	7666794	T	C
snp_sb042060374722	3	7747350	G	A
snp_sb042060374743	3	7767041	C	T
snp_sb042060374967	3	7826679	A	G
snp_sb042060375200	3	7908783	C	T
snp_sb042060375446	3	8002244	C	T
snp_sb042060375491	3	8012102	A	G
snp_sb042060375908	3	8104703	G	A
snp_sb042060375935	3	8122285	C	G
snp_sb042060376513	3	9052903	G	A
snp_sb042060376656	3	9109404	C	A
snp_sb042060376744	3	9143602	C	T
snp_sb042060377268	3	9279321	A	C
snp_sb042060377443	3	9298779	G	T
snp_sb042060377721	3	9361277	C	T
snp_sb042060377780	3	9432177	C	T
snp_sb042060378432	3	9929229	G	A
snp_sb042060378625	3	10185409	T	C
snp_sb042060378852	3	10370193	A	G
snp_sb042060378899	3	10494725	T	A
snp_sb042060379042	3	10559866	C	A
snp_sb042060379521	3	10718172	A	G
snp_sb042060379940	3	10836535	C	T
snp_sb042060380150	3	10921954	C	G
snp_sb042060380199	3	10932720	A	G
snp_sb042060380422	3	11053605	A	G
snp_sb042060380477	3	11141789	T	A
snp_sb042060380689	3	11281639	T	C
snp_sb042060380777	3	11358073	T	A
snp_sb042060381160	3	11583321	C	T
snp_sb042060381425	3	11703062	C	T
snp_sb042060381637	3	11848104	G	C
snp_sb042060382074	3	12046260	T	C
snp_sb042060382182	3	12114644	A	G
snp_sb042060382301	3	12145442	A	G
snp_sb042060382362	3	12160398	G	T
snp_sb042060382651	3	12257089	T	C
snp_sb042060382698	3	12266375	A	C
snp_sb042060382755	3	12302191	A	G
snp_sb042060383100	3	12463030	G	A
snp_sb042060383241	3	12569795	A	G
snp_sb042060383352	3	12621009	T	C
snp_sb042060383926	3	12834564	G	A
snp_sb042060384040	3	12866372	T	C
snp_sb042060384491	3	13181064	A	C
snp_sb042060385030	3	13415059	G	A
snp_sb042060385209	3	13494213	A	G
snp_sb042060385334	3	13568413	C	T
snp_sb042060385414	3	13612905	A	G
snp_sb042060385617	3	13715685	T	G
snp_sb042060385747	3	13766985	A	C
snp_sb042060385842	3	14046882	G	A
snp_sb042060385937	3	14158137	T	C
snp_sb042060386629	3	14939474	G	A
snp_sb042060387145	3	15909212	C	T
snp_sb042060387286	3	15999104	A	G
snp_sb042060387546	3	16424519	G	A
snp_sb042060388503	3	16869138	G	T
snp_sb042060389182	3	18257057	A	G
snp_sb042060390583	3	19716401	G	C
snp_sb042060391149	3	19938708	A	G
snp_sb042060391371	3	20014597	G	A
snp_sb042060391562	3	20260094	C	G
snp_sb042060391563	3	20261452	T	A
snp_sb042060392253	3	20523022	C	T
snp_sb042060392458	3	20561602	G	A
snp_sb042060403884	3	45957944	G	T
snp_sb042060405555	3	46880571	C	T
snp_sb042060406631	3	47366448	A	G
snp_sb042060407603	3	47880622	G	C
snp_sb042060407631	3	47898823	C	G
snp_sb042060409287	3	48609125	T	C
snp_sb042060410370	3	50549895	A	C
snp_sb042060410853	3	50669618	G	A
snp_sb042060410892	3	50688078	C	G
snp_sb042060411170	3	50771776	G	A
snp_sb042060411215	3	50805199	A	G
snp_sb042060411218	3	50807061	A	G
snp_sb042060411232	3	50812647	G	A
snp_sb042060411671	3	51407381	T	A
snp_sb042060411821	3	51504411	T	G
snp_sb042060412495	3	51794236	A	G
snp_sb042060412548	3	51824786	C	G
snp_sb042060412555	3	51833072	C	T
snp_sb042060412766	3	51927446	T	C
snp_sb042060412908	3	51959651	C	T
snp_sb042060413086	3	52239302	T	C
snp_sb042060413175	3	52262555	C	A
snp_sb042060413285	3	52322589	G	A
snp_sb042060413419	3	52422261	G	T
snp_sb042060413524	3	52485065	C	T
snp_sb042060413747	3	52649190	A	T
snp_sb042060414119	3	52778335	C	A
snp_sb042060414123	3	52780287	C	A
snp_sb042060414147	3	52797623	C	T
snp_sb042060414816	3	53033312	T	C
snp_sb042060414874	3	53110413	T	C
snp_sb042060415082	3	53177980	G	A
snp_sb042060415214	3	53232755	G	A
snp_sb042060415300	3	53282582	C	T
snp_sb042060415347	3	53294677	C	T
snp_sb042060415432	3	53338559	G	C
snp_sb042060415948	3	53565740	A	C
snp_sb042060416175	3	53970498	G	A
snp_sb042060416635	3	54087333	C	A
snp_sb042060416858	3	54149556	T	C
snp_sb042060417190	3	54364692	A	G
snp_sb042060417211	3	54375823	A	C
snp_sb042060417285	3	54404000	C	A
snp_sb042060417420	3	54448249	C	G
snp_sb042060417458	3	54481644	C	G
snp_sb042060418099	3	54652426	G	A
snp_sb042060418232	3	54709671	C	G
snp_sb042060418392	3	54791826	T	G
snp_sb042060418432	3	54820298	C	A
snp_sb042060418893	3	54994888	G	A
snp_sb042060418894	3	54995064	T	C
snp_sb042060418903	3	55002049	C	G
snp_sb042060419039	3	55078201	T	C
snp_sb042060419372	3	55191488	T	C
snp_sb042060419543	3	55264121	G	C
snp_sb042060419593	3	55292051	T	C
snp_sb042060419604	3	55300356	G	C
snp_sb042060419687	3	55331833	G	A
snp_sb042060419934	3	55459735	A	G
snp_sb042060420063	3	55545771	A	G
snp_sb042060420337	3	55722771	T	C
snp_sb042060420429	3	55891218	C	A
snp_sb042060420558	3	55994139	C	T
snp_sb042060420739	3	56075316	C	T
snp_sb042060420787	3	56098449	T	C
snp_sb042060421233	3	56272775	G	T
snp_sb042060421254	3	56276210	T	A
snp_sb042060421455	3	56322246	A	G
snp_sb042060422443	3	56681275	A	G
snp_sb042060422525	3	56723645	G	C
snp_sb042060422563	3	56758868	C	T
snp_sb042060423009	3	56907828	T	G
snp_sb042060423320	3	57065314	G	A
snp_sb042060423382	3	57144595	A	C
snp_sb042060423474	3	57189215	G	C
snp_sb042060423552	3	57235967	A	C
snp_sb042060423563	3	57252943	T	C
snp_sb042060423696	3	57321253	A	G
snp_sb042060423861	3	57360848	C	A
snp_sb042060424136	3	57472718	G	A
snp_sb042060424137	3	57472891	C	T
snp_sb042060424138	3	57475422	T	C
snp_sb042060424140	3	57475625	T	C
snp_sb042060424141	3	57477398	C	A
snp_sb042060424340	3	57620471	G	A
snp_sb042060424586	3	57815945	A	G
snp_sb042060424823	3	57944386	A	G
snp_sb042060424826	3	57944510	G	A
snp_sb042060424831	3	57944770	T	C
snp_sb042060424852	3	57953230	G	T
snp_sb042060424905	3	57962982	G	T
snp_sb042060425097	3	58170126	G	A
snp_sb042060425419	3	58307166	A	G
snp_sb042060425698	3	58425082	A	G
snp_sb042060425700	3	58425487	C	A
snp_sb042060425837	3	58737640	T	C
snp_sb042060425897	3	58769623	G	A
snp_sb042060425919	3	58780971	A	C
snp_sb042060426210	3	59140536	A	C
snp_sb042060426250	3	59174712	G	T
snp_sb042060426592	3	59472033	T	C
snp_sb042060426785	3	59537367	C	T
snp_sb042060426852	3	59611104	A	T
snp_sb042060426853	3	59615845	A	G
snp_sb042060426879	3	59634222	T	G
snp_sb042060427214	3	59702744	A	G
snp_sb042060427294	3	59723489	G	A
snp_sb042060427424	3	59804941	T	C
snp_sb042060427535	3	60065903	C	A
snp_sb042060427542	3	60068915	A	C
snp_sb042060427705	3	60155423	G	T
snp_sb042060427879	3	60240156	G	A
snp_sb042060428154	3	60329506	T	C
snp_sb042060428418	3	60472707	C	G
snp_sb042060428547	3	60491863	C	T
snp_sb042060428699	3	60568861	G	A
snp_sb042060429023	3	60716547	G	A
snp_sb042060429109	3	60767448	G	A
snp_sb042060429232	3	60811994	C	A
snp_sb042060429340	3	60899140	G	T
snp_sb042060429648	3	61024800	C	T
snp_sb042060429843	3	61204511	C	T
snp_sb042060429880	3	61242845	C	G
snp_sb042060430089	3	61338504	A	T
snp_sb042060430135	3	61368885	T	A
snp_sb042060430236	3	61419737	G	C
snp_sb042060430426	3	61476913	A	G
snp_sb042060430521	3	61516620	G	T
snp_sb042060430625	3	61559885	G	T
snp_sb042060430804	3	61825036	T	C
snp_sb042060430973	3	61915476	T	C
snp_sb042060431130	3	62017451	C	G
snp_sb042060431205	3	62057515	C	G
snp_sb042060431339	3	62121385	A	G
snp_sb042060431549	3	62201822	G	C
snp_sb042060431576	3	62238543	G	T
snp_sb042060431741	3	62320176	T	C
snp_sb042060431898	3	62362913	A	G
snp_sb042060432706	3	63102404	C	G
snp_sb042060432845	3	63307844	A	T
snp_sb042060433039	3	63448439	A	G
snp_sb042060433060	3	63493020	G	A
snp_sb042060433132	3	63631249	A	T
snp_sb042060433212	3	63802770	C	G
snp_sb042060433316	3	63951933	T	A
snp_sb042060433337	3	63989880	A	G
snp_sb042060433542	3	64137710	T	C
snp_sb042060433558	3	64155846	G	T
snp_sb042060433709	3	64406309	C	T
snp_sb042060433774	3	64455467	C	G
snp_sb042060433985	3	64503006	T	G
snp_sb042060434109	3	64646981	A	T
snp_sb042060434166	3	64677628	C	T
snp_sb042060434280	3	64830003	C	A
snp_sb042060434420	3	65168050	A	G
snp_sb042060434533	3	65407534	T	C
snp_sb042060434574	3	65457769	C	T
snp_sb042060434673	3	65617000	A	G
snp_sb042060434706	3	65656928	C	G
snp_sb042060434769	3	65706545	A	G
snp_sb042060434808	3	65842681	A	G
snp_sb042060435124	3	66010382	T	G
snp_sb042060435272	3	66110512	T	A
snp_sb042060435412	3	66322247	G	C
snp_sb042060435693	3	66409697	C	G
snp_sb042060435995	3	66792208	G	T
snp_sb042060436057	3	66848967	C	T
snp_sb042060436215	3	67410049	G	C
snp_sb042060436221	3	67543054	C	T
snp_sb042060436364	3	67632365	T	G
snp_sb042060436432	3	67684504	T	G
snp_sb042060436727	3	67924538	G	C
snp_sb042060436828	3	67978112	T	C
snp_sb042060436847	3	67997197	G	A
snp_sb042060436956	3	68036501	C	T
snp_sb042060437027	3	68095905	C	A
snp_sb042060437236	3	68196869	C	G
snp_sb042060437396	3	68247995	A	T
snp_sb042060437498	3	68321726	A	G
snp_sb042060437602	3	68398083	G	A
snp_sb042060437654	3	68433644	C	A
snp_sb042060437883	3	68571799	T	A
snp_sb042060438239	3	68740794	G	C
snp_sb042060438448	3	68969684	C	A
snp_sb042060438613	3	69204457	C	T
snp_sb042060438681	3	69241567	T	C
snp_sb042060438719	3	69278520	G	A
snp_sb042060438812	3	69340368	C	G
snp_sb042060438947	3	69416350	C	T
snp_sb042060439133	3	69536402	C	A
snp_sb042060439256	3	69629501	A	G
snp_sb042060439651	3	69857837	C	T
snp_sb042060439746	3	69900161	C	T
snp_sb042060440118	3	70069906	A	G
snp_sb042060440168	3	70105666	G	A
snp_sb042060440632	3	70241479	A	C
snp_sb042060440844	3	70290422	C	T
snp_sb042060441004	3	70389480	G	C
snp_sb042060441061	3	70424280	G	T
snp_sb042060441115	3	70462647	A	C
snp_sb042060441249	3	70524389	T	C
snp_sb042060441629	3	70604368	T	C
snp_sb042060442134	3	70739462	G	A
snp_sb042060442778	3	70943965	A	G
snp_sb042060443274	3	71098786	C	A
snp_sb042060443379	3	71209933	A	G
snp_sb042060443845	3	71426526	T	C
snp_sb042060443923	3	71465743	C	T
snp_sb042060444100	3	71554747	T	G
snp_sb042060444350	3	71634888	T	C
snp_sb042060444814	3	71866629	A	G
snp_sb042060444877	3	71922125	G	A
snp_sb042060445022	3	71981449	C	G
snp_sb042060445084	3	72022935	T	C
snp_sb042060445390	3	72156419	A	T
snp_sb042060445425	3	72173860	G	A
snp_sb042060445505	3	72217153	G	C
snp_sb042060445645	3	72284237	C	T
snp_sb042060445665	3	72303400	T	C
snp_sb042060445811	3	72428636	G	C
snp_sb042060445952	3	72494015	T	C
snp_sb042060446112	3	72551448	T	C
snp_sb042060446323	3	72667418	C	T
snp_sb042060446464	3	72723409	G	A
snp_sb042060446486	3	72742644	C	T
snp_sb042060446527	3	72796712	T	C
snp_sb042060446588	3	72849689	A	C
snp_sb042060446990	3	73007467	C	G
snp_sb042060447325	3	73143343	A	G
snp_sb042060447816	3	73297892	A	C
snp_sb042060447936	3	73332584	T	C
snp_sb042060448121	3	73399918	A	G
snp_sb042060448262	3	73453033	G	A
snp_sb042060448516	3	73577573	G	T
snp_sb042060448898	3	73759081	C	G
snp_sb042060449143	3	73816979	A	C
snp_sb042060449183	3	73834323	A	C
snp_sb042060449332	3	73869154	C	A
snp_sb042060449417	3	73904196	A	C
snp_sb042060449793	3	74064092	A	G
snp_sb042060449891	3	74104983	T	C
snp_sb042060450245	3	74187584	C	A
snp_sb042060450323	3	74263066	G	A
snp_sb042060450363	3	74307046	T	C
snp_sb042060450506	3	74382900	T	C
snp_sb042060366056	3	1001553	A	C
snp_sb042060379134	3	10571017	T	C
snp_sb042060379604	3	10734118	G	T
snp_sb042060379733	3	10777945	T	G
snp_sb042060379819	3	10784436	T	C
snp_sb042060366279	3	1103594	G	A
snp_sb042060381218	3	11592935	A	G
snp_sb042060382582	3	12239063	A	G
snp_sb042060366504	3	1288894	T	C
snp_sb042060385035	3	13416579	C	T
snp_sb042060385211	3	13494361	C	G
snp_sb042060385634	3	13721562	T	C
snp_sb042060385789	3	13769800	T	C
snp_sb042060387475	3	16377571	A	G
snp_sb042060388502	3	16868775	C	G
snp_sb042060366940	3	1905405	G	A
snp_sb042060366987	3	1910168	C	T
snp_sb042060393124	3	20982936	G	A
snp_sb042060364912	3	232580	C	T
snp_sb042060368432	3	3667312	A	T
snp_sb042060368553	3	3697525	C	G
snp_sb042060368691	3	3720735	A	G
snp_sb042060369202	3	3911244	T	G
snp_sb042060369365	3	4003923	C	T
snp_sb042060405478	3	46832653	C	T
snp_sb042060405751	3	46955839	T	A
snp_sb042060407741	3	47921310	C	G
snp_sb042060369938	3	4896641	C	T
snp_sb042060410056	3	50038141	C	G
snp_sb042060370206	3	5058862	C	A
snp_sb042060410896	3	50689129	G	C
snp_sb042060411448	3	51262232	G	C
snp_sb042060411696	3	51430565	T	C
snp_sb042060411785	3	51468453	G	A
snp_sb042060411830	3	51505971	T	A
snp_sb042060412004	3	51532416	A	C
snp_sb042060370460	3	5175500	T	G
snp_sb042060413088	3	52239476	T	A
snp_sb042060370635	3	5248094	A	G
snp_sb042060415270	3	53266051	C	T
snp_sb042060416097	3	53631588	G	C
snp_sb042060417207	3	54371465	G	C
snp_sb042060418257	3	54718299	A	G
snp_sb042060418288	3	54726366	T	C
snp_sb042060370878	3	5493645	G	A
snp_sb042060419400	3	55200715	G	A
snp_sb042060419549	3	55268281	C	T
snp_sb042060419935	3	55459977	T	G
snp_sb042060371020	3	5563108	C	T
snp_sb042060365258	3	556650	A	G
snp_sb042060371060	3	5587695	G	A
snp_sb042060420516	3	55901567	G	A
snp_sb042060421242	3	56273568	A	C
snp_sb042060421331	3	56282622	G	A
snp_sb042060422034	3	56554344	A	T
snp_sb042060422447	3	56681929	A	G
snp_sb042060422569	3	56759334	C	G
snp_sb042060423263	3	57047937	A	G
snp_sb042060423280	3	57049683	T	C
snp_sb042060423325	3	57065511	C	T
snp_sb042060423965	3	57378751	C	G
snp_sb042060424659	3	57841842	T	C
snp_sb042060425239	3	58236900	C	T
snp_sb042060425728	3	58432583	C	T
snp_sb042060426251	3	59174817	T	C
snp_sb042060426871	3	59631951	T	A
snp_sb042060427006	3	59666485	A	G
snp_sb042060427614	3	60100188	C	T
snp_sb042060427707	3	60156684	G	A
snp_sb042060427946	3	60262840	G	T
snp_sb042060428013	3	60281974	T	G
snp_sb042060428585	3	60501386	T	C
snp_sb042060428939	3	60615907	G	A
snp_sb042060429236	3	60813025	T	A
snp_sb042060430002	3	61276860	A	C
snp_sb042060430136	3	61369040	A	G
snp_sb042060430444	3	61478954	G	C
snp_sb042060430638	3	61560860	T	A
snp_sb042060365391	3	617304	G	T
snp_sb042060430885	3	61870375	G	C
snp_sb042060431481	3	62164720	G	A
snp_sb042060431746	3	62320669	C	G
snp_sb042060432018	3	62393643	C	G
snp_sb042060432081	3	62401822	G	A
snp_sb042060432176	3	62430521	T	A
snp_sb042060432448	3	62544647	A	C
snp_sb042060372207	3	6329374	A	G
snp_sb042060432979	3	63399704	A	C
snp_sb042060433229	3	63810830	A	C
snp_sb042060433710	3	64406562	T	C
snp_sb042060433987	3	64504537	G	T
snp_sb042060434584	3	65470900	T	C
snp_sb042060434818	3	65858748	C	A
snp_sb042060435321	3	66138429	G	A
snp_sb042060435551	3	66358225	G	C
snp_sb042060435703	3	66410437	C	A
snp_sb042060435788	3	66417157	T	G
snp_sb042060436309	3	67589854	G	C
snp_sb042060436779	3	67939218	T	A
snp_sb042060437001	3	68058566	A	G
snp_sb042060372937	3	6834271	A	G
snp_sb042060437885	3	68573145	C	A
snp_sb042060438298	3	68782851	T	C
snp_sb042060438559	3	69147113	C	A
snp_sb042060373114	3	6929704	A	G
snp_sb042060438909	3	69374745	T	G
snp_sb042060439289	3	69637559	T	A
snp_sb042060439477	3	69764576	G	C
snp_sb042060439658	3	69858871	T	C
snp_sb042060439880	3	69925946	C	G
snp_sb042060439945	3	69976778	A	G
snp_sb042060440294	3	70133111	C	T
snp_sb042060440382	3	70152988	C	A
snp_sb042060440694	3	70247700	T	C
snp_sb042060440845	3	70290532	G	C
snp_sb042060441216	3	70494523	T	C
snp_sb042060441274	3	70530277	T	C
snp_sb042060441740	3	70623925	A	G
snp_sb042060441870	3	70638492	G	A
snp_sb042060441897	3	70640309	C	A
snp_sb042060442084	3	70711190	G	T
snp_sb042060442385	3	70834645	C	T
snp_sb042060442444	3	70840912	T	C
snp_sb042060442537	3	70867324	T	A
snp_sb042060442830	3	70955105	C	T
snp_sb042060442937	3	70966962	T	C
snp_sb042060442990	3	70969391	G	A
snp_sb042060443198	3	71047297	G	T
snp_sb042060443307	3	71141263	A	G
snp_sb042060443479	3	71232378	T	C
snp_sb042060444165	3	71575780	C	T
snp_sb042060444498	3	71652145	T	A
snp_sb042060444844	3	71887238	G	C
snp_sb042060445145	3	72034574	A	T
snp_sb042060445274	3	72112461	T	C
snp_sb042060445296	3	72120754	G	A
snp_sb042060374024	3	7229580	T	C
snp_sb042060445698	3	72310520	T	C
snp_sb042060445706	3	72320613	A	C
snp_sb042060445956	3	72496531	T	A
snp_sb042060446009	3	72512315	G	A
snp_sb042060446062	3	72534207	C	T
snp_sb042060447018	3	73010322	G	A
snp_sb042060447059	3	73027088	A	G
snp_sb042060447143	3	73063435	T	C
snp_sb042060447526	3	73221660	A	G
snp_sb042060448340	3	73494521	A	G
snp_sb042060448413	3	73524917	T	G
snp_sb042060448564	3	73606427	T	C
snp_sb042060448702	3	73685414	G	A
snp_sb042060448782	3	73704641	C	T
snp_sb042060448971	3	73777200	G	C
snp_sb042060449341	3	73879827	C	T
snp_sb042060449355	3	73882288	C	T
snp_sb042060449371	3	73886025	A	C
snp_sb042060449563	3	73927776	C	T
snp_sb042060449984	3	74120706	C	T
snp_sb042060450372	3	74311135	C	A
snp_sb042060374795	3	7775078	G	T
snp_sb042060375010	3	7831937	A	G
snp_sb042060365811	3	809439	A	C
snp_sb042060365825	3	812183	A	T
snp_sb042060376545	3	9057564	A	G
snp_sb042060376797	3	9145660	A	G
snp_sb042060377449	3	9299869	T	A
snp_sb042060377527	3	9316102	T	C
snp_sb042060377571	3	9329106	C	G
snp_sb042060377621	3	9338465	T	C
snp_sb042060378422	3	9919418	A	C
snp_sb042060382757	3	12303268	G	A
snp_sb042060367113	3	1980633	T	A
snp_sb042060369652	3	4750842	A	G
snp_sb042060411834	3	51506181	G	A
snp_sb042060418297	3	54727724	T	A
snp_sb042060421243	3	56275285	G	A
snp_sb042060424678	3	57857787	G	A
snp_sb042060428017	3	60282169	G	A
snp_sb042060431263	3	62078609	G	A
snp_sb042060372387	3	6381400	T	C
snp_sb042060436373	3	67637500	G	C
snp_sb042060439348	3	69658114	C	A
snp_sb042060441250	3	70526176	G	A
snp_sb042060442831	3	70955252	G	A
snp_sb042060445146	3	72034810	G	T
snp_sb042060447019	3	73010484	T	A
snp_sb042060448972	3	73777375	C	T
snp_sb042060375910	3	8109123	G	C
snp_sb001000351814	4	452829	C	A
snp_sb001000351819	4	453410	C	T
snp_sb001000351824	4	453698	T	C
snp_sb001000351825	4	453774	G	A
snp_sb001000352151	4	725358	A	C
snp_sb001000352477	4	849179	C	T
snp_sb001000352639	4	949352	A	G
snp_sb001000354188	4	1577817	G	C
snp_sb001000354412	4	1669767	C	T
snp_sb001000355231	4	2276881	C	G
snp_sb001000355255	4	2284107	T	G
snp_sb001000355478	4	2371171	C	T
snp_sb001000355704	4	2487778	A	G
snp_sb001000357706	4	3705320	A	G
snp_sb001000360101	4	4985242	A	G
snp_sb001000361462	4	5883957	A	T
snp_sb001000361548	4	5929299	A	G
snp_sb001000361549	4	5929387	G	A
snp_sb001000361550	4	5929528	G	A
snp_sb001000361552	4	5929733	G	A
snp_sb001000362091	4	6158866	C	T
snp_sb001000362667	4	6420995	G	T
snp_sb001000363604	4	7134621	T	C
snp_sb001000365243	4	7776067	G	A
snp_sb001000365901	4	7962004	T	A
snp_sb001000365903	4	7962077	G	C
snp_sb001000367099	4	8350354	A	T
snp_sb001000370493	4	9913904	G	A
snp_sb001000370720	4	10062379	C	T
snp_sb001000371147	4	10278156	C	A
snp_sb001000371194	4	10299240	A	G
snp_sb001000371200	4	10302340	C	A
snp_sb001000371201	4	10303246	G	A
snp_sb001000371877	4	10611384	T	A
snp_sb001000373609	4	11530302	C	G
snp_sb001000378525	4	13278028	G	A
snp_sb001000379252	4	13559075	A	G
snp_sb001000379982	4	13782526	C	A
snp_sb001000382596	4	15058309	G	C
snp_sb001000384361	4	15660067	G	A
snp_sb001000385421	4	16124580	C	A
snp_sb001000393273	4	19446013	G	A
snp_sb001000394016	4	19719886	A	G
snp_sb001000435348	4	40069234	T	A
snp_sb001000438086	4	40813375	C	T
snp_sb001000445752	4	43583234	G	C
snp_sb001000452883	4	46616273	G	A
snp_sb001000453716	4	46965033	C	T
snp_sb001000454785	4	47422903	T	C
snp_sb001000456211	4	48067322	C	T
snp_sb001000462203	4	50906055	T	C
snp_sb001000462486	4	51121843	G	A
snp_sb001000462725	4	51311544	C	T
snp_sb001000463966	4	51713916	G	A
snp_sb001000465034	4	52084109	A	G
snp_sb001000465226	4	52145636	T	C
snp_sb001000465485	4	52240666	C	T
snp_sb001000467136	4	52937137	T	A
snp_sb001000467166	4	52955257	A	G
snp_sb001000467856	4	53279046	C	T
snp_sb001000468488	4	53608741	T	A
snp_sb001000469430	4	53999996	T	C
snp_sb001000469722	4	54108806	C	T
snp_sb001000471441	4	54869076	A	G
snp_sb001000472541	4	55515392	G	A
snp_sb001000472651	4	55527424	T	G
snp_sb001000473539	4	55879308	G	A
snp_sb001000473809	4	56024342	C	G
snp_sb001000473951	4	56081469	A	G
snp_sb001000474335	4	56315233	G	T
snp_sb001000482466	4	61971966	A	G
snp_sb001000482471	4	61983014	A	C
snp_sb001000482472	4	61983254	A	G
snp_sb001000482473	4	61984982	C	T
snp_sb001000482474	4	61985119	T	C
snp_sb001000482475	4	61987066	G	A
snp_sb001000482477	4	61988638	T	C
snp_sb001000482478	4	61989325	T	C
snp_sb001000483659	4	62735837	G	A
snp_sb001000483660	4	62736274	A	T
snp_sb042060452067	4	975939	C	T
snp_sb042060454804	4	2241435	A	G
snp_sb042060463770	4	7422388	A	G
snp_sb042060463773	4	7422481	C	T
snp_sb042060463775	4	7422642	A	C
snp_sb042060463777	4	7424990	C	T
snp_sb042060479510	4	13838999	T	A
snp_sb042060479511	4	13839849	G	A
snp_sb042060479515	4	13840285	A	G
snp_sb042060479618	4	13905444	G	A
snp_sb042060479620	4	13907663	C	T
snp_sb042060479621	4	13909468	G	A
snp_sb042060479622	4	13910701	G	A
snp_sb042060479628	4	13913891	C	T
snp_sb042060479630	4	13914439	T	C
snp_sb042060479631	4	13914730	C	G
snp_sb042060479632	4	13917998	G	A
snp_sb042060479633	4	13918129	G	A
snp_sb042060517271	4	2266418	G	A
snp_sb042060517281	4	67342998	A	T
snp_sb042060517631	4	4685387	G	A
snp_sb042060517677	4	55999475	A	G
snp_sb042060517678	4	55814311	T	C
snp_sb042060517679	4	788467	C	G
snp_sb042060517691	4	12259465	G	A
snp_sb042060517693	4	4146363	T	C
snp_sb042060517715	4	58284599	A	G
snp_sb042060517716	4	53121906	C	T
snp_sb042060517759	4	12448550	G	A
snp_sb042060517760	4	2188090	G	C
snp_sb042060517773	4	58335056	T	C
snp_sb042060517832	4	62080525	C	T
snp_sb042060517849	4	3838289	C	T
snp_sb042060517985	4	67869324	A	G
snp_sb042060517997	4	66249195	C	A
snp_sb042060517998	4	57455829	C	G
snp_sb042060518011	4	57568129	A	G
snp_sb042060518021	4	66278921	C	A
snp_sb042060518022	4	3847963	A	C
snp_sb042060518023	4	3761717	C	G
snp_sb042060518024	4	57554554	T	C
snp_sb042060518025	4	52593887	C	T
snp_sb042060518027	4	48069237	A	G
snp_sb042060518028	4	51111279	G	C
snp_sb042060518031	4	1256000	G	A
snp_sb042060518032	4	1311647	A	G
snp_sb042060518034	4	55858256	C	G
snp_sb042060518035	4	55568941	T	C
snp_sb042060518036	4	56525121	G	T
snp_sb042060518042	4	1009507	A	C
snp_sb042060518047	4	67363205	G	C
snp_sb042060518048	4	6372570	C	A
snp_sb042060518053	4	2277282	T	C
snp_sb042060518094	4	2812374	A	G
snp_sb042060518095	4	66869832	C	T
snp_sb042060518096	4	1624499	T	A
snp_sb042060518142	4	4395231	T	A
snp_sb042060518149	4	55482450	C	G
snp_sb042060518152	4	55874920	C	T
snp_sb042060518155	4	52947333	G	A
snp_sb042060518206	4	3862091	A	C
snp_sb042060518213	4	55080028	C	A
snp_sb042060518238	4	57143926	C	T
snp_sb042060518262	4	55506292	C	A
snp_sb042060518263	4	56080752	C	T
snp_sb042060518268	4	8269218	C	T
snp_sb042060518270	4	55636612	G	A
snp_sb042060518391	4	4426262	A	G
snp_sb042060518410	4	2801266	G	A
snp_sb042060518449	4	2561357	G	T
snp_sb042060518489	4	61259241	G	C
snp_sb042060518490	4	9450722	G	A
snp_sb042060518501	4	42145991	T	G
snp_sb042060518502	4	10502442	T	C
snp_sb042060518504	4	13157527	T	C
snp_sb042060518505	4	55827632	A	C
snp_sb042060518509	4	1567665	C	G
snp_sb042060518512	4	56068369	G	C
snp_sb042060521073	4	13311082	T	C
snp_sb042060521074	4	13840721	T	G
snp_sb042060521077	4	2395167	T	G
snp_sb042060521080	4	4877923	G	A
snp_sb042060521082	4	1348379	C	G
snp_sb042060521083	4	1647986	A	G
snp_sb042060521087	4	7790103	G	T
snp_sb042060521088	4	51975309	G	C
snp_sb042060521089	4	2178375	A	G
snp_sb042060521090	4	53607958	C	T
snp_sb042060521091	4	62922409	C	T
snp_sb042060521092	4	1301354	C	A
snp_sb042060521095	4	4984244	C	T
snp_sb042060521102	4	57980411	A	G
snp_sb042060521103	4	52502831	A	C
snp_sb042060521104	4	10278327	C	T
snp_sb042060521109	4	1035479	C	G
snp_sb042060521110	4	1613259	C	A
snp_sb042060521113	4	51951248	C	T
snp_sb042060521142	4	8916581	T	A
snp_sb042060521313	4	58890175	C	T
snp_sb042060521472	4	7882871	A	T
snp_sb042060521560	4	67756511	A	G
snp_sb042060521586	4	51777432	C	T
snp_sb042060521588	4	3807296	C	A
snp_sb042060521591	4	3905341	C	T
snp_sb042060521592	4	56655323	T	G
snp_sb042060521594	4	2840651	C	T
snp_sb042060521597	4	52835248	T	G
snp_sb042060521603	4	52870130	C	G
snp_sb042060521604	4	66819609	C	A
snp_sb042060521608	4	6401907	T	A
snp_sb042060521648	4	51718541	G	A
snp_sb042060521663	4	502195	T	C
snp_sb042060521664	4	67081622	C	A
snp_sb042060521686	4	2474232	T	A
snp_sb042060521755	4	6774274	C	T
snp_sb042060521767	4	562408	T	G
snp_sb042060521891	4	66146475	A	G
snp_sb042060521941	4	5015706	A	C
snp_sb042060521943	4	12147457	T	C
snp_sb042060521969	4	8301852	A	G
snp_sb042060522042	4	53816456	G	C
snp_sb042060522214	4	67046039	G	T
snp_sb042060522216	4	11530385	A	G
snp_sb042060522217	4	51750675	T	C
snp_sb042060522238	4	4717586	T	C
snp_sb042060522240	4	51688994	G	A
snp_sb042060522246	4	62163305	G	A
snp_sb042060522259	4	51335553	T	G
snp_sb042060522324	4	4108667	C	T
snp_sb042060522501	4	4494636	C	A
snp_sb042060522608	4	58406870	C	A
snp_sb042060522685	4	42500860	T	C
snp_sb042060522707	4	46657057	T	G
snp_sb042060522765	4	67859982	G	A
snp_sb042060522815	4	46356225	A	T
snp_sb042060522832	4	52079157	T	G
snp_sb042060522876	4	52630651	A	G
snp_sb042060522877	4	58231984	A	G
snp_sb042060522981	4	57604523	C	T
snp_sb042060523000	4	6573893	A	G
snp_sb042060523092	4	51302305	C	A
snp_sb042060523115	4	53112863	G	T
snp_sb042060523173	4	67967560	A	G
snp_sb042060523174	4	67930187	A	G
snp_sb042060523179	4	4755657	G	A
snp_sb042060523184	4	7922309	G	C
snp_sb042060523186	4	7172474	C	A
snp_sb042060523191	4	7028919	G	C
snp_sb042060523227	4	7211725	C	T
snp_sb042060523231	4	66858877	A	G
snp_sb042060523233	4	9799696	C	T
snp_sb042060523235	4	56871103	C	T
snp_sb042060523468	4	4795132	C	T
snp_sb042060523470	4	54084053	C	G
snp_sb042060523471	4	5165777	C	T
snp_sb042060523489	4	828399	A	G
snp_sb042060523553	4	1553324	T	G
snp_sb042060523570	4	11593485	G	C
snp_sb042060523656	4	10417765	G	C
snp_sb042060523667	4	1162086	G	A
snp_sb042060523668	4	4203922	G	A
snp_sb042060523762	4	6839194	A	C
snp_sb042060523763	4	4676844	C	T
snp_sb042060523764	4	10544745	A	G
snp_sb042060523767	4	4012654	C	T
snp_sb042060523873	4	8819987	C	A
snp_sb042060524112	4	60040745	T	A
snp_sb042060524376	4	67334755	A	G
snp_sb042060524400	4	61026228	T	A
snp_sb042060524403	4	61026598	A	C
snp_sb042060524405	4	61027409	C	A
snp_sb042060524406	4	61027943	G	T
snp_sb042060524408	4	5093767	C	G
snp_sb042060524497	4	7965934	C	T
snp_sb042060524523	4	54044421	G	C
snp_sb042060524606	4	2232112	G	C
snp_sb042060524621	4	10252465	T	C
snp_sb042060524632	4	7835097	T	C
snp_sb042060524637	4	62987312	A	C
snp_sb042060524643	4	54165068	G	C
snp_sb042060524658	4	57808025	T	C
snp_sb042060524860	4	58034623	T	C
snp_sb042060524886	4	51609086	T	C
snp_sb042060524948	4	67727225	A	T
snp_sb042060524958	4	67824325	C	A
snp_sb042060524979	4	6462261	T	C
snp_sb042060524992	4	8013331	G	T
snp_sb042060524993	4	12439457	A	G
snp_sb042060525106	4	2444013	G	C
snp_sb042060525257	4	8776939	C	G
snp_sb042060525414	4	62128535	G	A
snp_sb042060525544	4	51881775	T	C
snp_sb042060525579	4	50323796	T	A
snp_sb042060525591	4	52459901	C	T
snp_sb042060525592	4	55558475	T	C
snp_sb042060525598	4	2084043	C	T
snp_sb042060525651	4	3174760	A	C
snp_sb042060525654	4	11238954	T	C
snp_sb042060525659	4	8724606	A	G
snp_sb042060525660	4	51242963	T	C
snp_sb042060525663	4	3340086	T	G
snp_sb042060525690	4	56054860	T	C
snp_sb042060525745	4	56140473	T	A
snp_sb042060526037	4	66209947	G	C
snp_sb042060526107	4	3104408	G	A
snp_sb042060526113	4	52397341	A	G
snp_sb042060526356	4	51833231	T	C
snp_sb042060526358	4	4075261	A	G
snp_sb042060526362	4	998826	C	G
snp_sb042060526367	4	8673655	A	G
snp_sb042060526457	4	61031917	G	T
snp_sb042060526464	4	8890484	T	G
snp_sb042060526465	4	2547983	G	A
snp_sb042060526469	4	59126884	C	T
snp_sb042060526581	4	939002	G	T
snp_sb042060526660	4	3286720	G	A
snp_sb042060526661	4	51173366	G	T
snp_sb042060526662	4	51557624	A	G
snp_sb042060526791	4	11173731	C	T
snp_sb042060526814	4	4958970	T	A
snp_sb042060526816	4	55937172	C	A
snp_sb042060526819	4	52708397	G	A
snp_sb042060526821	4	4383980	G	A
snp_sb042060526825	4	66343002	T	C
snp_sb042060526828	4	8215626	T	G
snp_sb042060526830	4	53674140	A	G
snp_sb042060526831	4	52935586	T	C
snp_sb042060526832	4	57543695	C	T
snp_sb042060526856	4	13907219	C	T
snp_sb042060526863	4	2151465	A	G
snp_sb042060526866	4	56514591	C	T
snp_sb042060526900	4	56299947	G	T
snp_sb042060526936	4	11663515	A	T
snp_sb042060526947	4	52572953	T	G
snp_sb042060526967	4	10489210	A	T
snp_sb042060526993	4	8615981	T	A
snp_sb042060526995	4	53749429	A	C
snp_sb042060526996	4	65007888	C	T
snp_sb042060527001	4	49335014	A	C
snp_sb042060527007	4	56831258	A	G
snp_sb042060527009	4	46617293	A	G
snp_sb042060527011	4	11112226	A	T
snp_sb042060527014	4	7765270	A	G
snp_sb042060527016	4	68133678	G	A
snp_sb042060527017	4	1243400	T	G
snp_sb042060527018	4	10376538	C	A
snp_sb042060527132	4	51433771	G	A
snp_sb042060527155	4	7298825	C	G
snp_sb042060527158	4	12235431	C	G
snp_sb042060527159	4	3750365	A	G
snp_sb042060527219	4	56229088	C	T
snp_sb042060527229	4	53539068	A	C
snp_sb042060527304	4	2370128	G	A
snp_sb042060527312	4	57131674	G	A
snp_sb042060527313	4	11756641	T	C
snp_sb042060527381	4	5583523	T	G
snp_sb042060527393	4	6042229	C	G
snp_sb042060527402	4	67226016	C	T
snp_sb042060527405	4	68629177	G	A
snp_sb042060527446	4	66632173	T	G
snp_sb042060527447	4	7416807	G	A
snp_sb042060527554	4	54443892	T	A
snp_sb042060527558	4	7133838	T	C
snp_sb042060527599	4	57913474	G	T
snp_sb042060527658	4	12818851	T	G
snp_sb042060527669	4	6161169	T	G
snp_sb042060527670	4	47087479	T	C
snp_sb042060527671	4	56426361	A	C
snp_sb042060527830	4	4634882	C	G
snp_sb042060527837	4	49234735	G	C
snp_sb042060527838	4	2011259	G	C
snp_sb042060527853	4	4321084	A	G
snp_sb042060527863	4	2760663	G	A
snp_sb042060527864	4	12115975	C	G
snp_sb042060527999	4	54288691	T	C
snp_sb042060528000	4	6361729	G	T
snp_sb042060528002	4	66789152	A	G
snp_sb042060528008	4	53075595	G	A
snp_sb042060528022	4	12391966	G	C
snp_sb042060528023	4	62292858	C	T
snp_sb042060528024	4	13288172	A	C
snp_sb042060528025	4	67005855	C	A
snp_sb042060528026	4	699735	G	A
snp_sb042060528027	4	49117016	G	A
snp_sb042060528028	4	66522181	A	G
snp_sb042060528029	4	61176012	C	A
snp_sb042060528033	4	5471969	C	G
snp_sb042060528035	4	57293991	T	C
snp_sb042060528037	4	50667029	C	T
snp_sb042060528038	4	6989976	A	T
[truncated: 3,005 more rows]
