# Supplementary material for: Genetic Diversity and Population Structure of Sorghum [Sorghum Bicolor (L.) Moench] Accessions as Revealed by Single Nucleotide Polymorphism Markers
Source: Front Plant Sci. 2022 Jan 5;12:799482. doi: 10.3389/fpls.2021.799482 (PMC8766336; doi:10.3389/fpls.2021.799482)
Supplement: Supplementary file 8 [file Table_3.XLSX]

## Sheet: Sheet1
Supplementary Table S3: List of genes with known function whose SNPs were included in the present study
snp_refname	chrom:start_pos	end_pos	gene_name			reference allele			reference sequence
snp_sb001000002529	Chr1:1489678	1489678	Sobic.001G017500	3' UTR variant	GAGGCGCGCGGGAGCCGGGAAATGGCCAAA	G	[T]	CGTGCCTCCTCCTGGTCGTGGACCGACGTG	GAGGCGCGCGGGAGCCGGGAAATGGCCAAAGCGTGCCTCCTCCTGGTCGTGGACCGACGTG
snp_sb001000002532	Chr1:1489866	1489866	Sobic.001G017500	3' UTR variant	CAGAAGCACAACTCGGCTTCGTCAAGCGAG	C	[T]	GACTACTCCATGCATCTCCCTCCATCCATA	CAGAAGCACAACTCGGCTTCGTCAAGCGAGCGACTACTCCATGCATCTCCCTCCATCCATA
snp_sb001000020836	Chr1:12234636	12234636	Sobic.001G152700	Missense variant	TTGACGTTAAAGACGTCAGCTTGGAGGCTA	C	[G]	TGACCCATGTCTTTCTGATCGCATGGCTAC	TTGACGTTAAAGACGTCAGCTTGGAGGCTACTGACCCATGTCTTTCTGATCGCATGGCTAC
snp_sb001000020837	Chr1:12234760	12234760	Sobic.001G152700	Synonymous Variant	GGATGATGATGTCGTTTACTTGCTTTCTCG	G	[A]	ACCAGACCCAGGGACATGGACAAGTTGGCA	GGATGATGATGTCGTTTACTTGCTTTCTCGGACCAGACCCAGGGACATGGACAAGTTGGCA
snp_sb001000020838	Chr1:12234805	12234805	Sobic.001G152700	Synonymous Variant	CATGGACAAGTTGGCACTGATGTTTGCTAT	T	[A]	GATTTGAGGAAGGCAACATTGCGAGGATTG	CATGGACAAGTTGGCACTGATGTTTGCTATTGATTTGAGGAAGGCAACATTGCGAGGATTG
snp_sb001000020839	Chr1:12234904	12234904	Sobic.001G152700	Synonymous Variant	CTTCTGTGCAAGTGAGATCTGCAGGGGTAC	A	[C]	TGAGCAATATTAAGGTAACTTCTGTATGCT	CTTCTGTGCAAGTGAGATCTGCAGGGGTACATGAGCAATATTAAGGTAACTTCTGTATGCT
snp_sb001000020840	Chr1:12234958	12234958	Sobic.001G152700	5' UTR Premature Start Codon Gain Variant	GTATGCTGTTAAGTTCCTTTATGTTTTTAT	G	[A]	TGCGACTATATGTATGAATGGCATGCTTGT	GTATGCTGTTAAGTTCCTTTATGTTTTTATGTGCGACTATATGTATGAATGGCATGCTTGT
snp_sb001000020843	Chr1:12235158	12235158	Sobic.001G152700	5' UTR Premature Start Codon Gain Variant	CTGTACAGTGTTTTCGATGTTGTATATCAG	C	[T]	TGATTAAACAAATCCTGGTAATCCAATAAA	CTGTACAGTGTTTTCGATGTTGTATATCAGCTGATTAAACAAATCCTGGTAATCCAATAAA
snp_sb001000020844	Chr1:12235210	12235210	Sobic.001G152700	5' UTR Premature Start Codon Gain Variant	TCCAATAAAAATAAGTTTGTGTTAAGCTGA	A	[G]	TTTTTGTTGTTTGTGCGTGATCCTTCCTGT	TCCAATAAAAATAAGTTTGTGTTAAGCTGAATTTTTGTTGTTTGTGCGTGATCCTTCCTGT
snp_sb001000020846	Chr1:12235350	12235350	Sobic.001G152700	5' UTR Premature Start Codon Gain Variant	ATACTAAACAGCTTATATTGAAATAAAAAG	A	[G]	CAAATTAAGATTATATTTATTTTGCTTGAA	ATACTAAACAGCTTATATTGAAATAAAAAGACAAATTAAGATTATATTTATTTTGCTTGAA
snp_sb001000020847	Chr1:12236797	12236797	Sobic.001G152700	3' UTR variant	GGATTATGTTGCTTGCAGTATGCAGATACA	C	[G]	GTACTTTTTTATGTACTAGTGGACTTGTGT	GGATTATGTTGCTTGCAGTATGCAGATACACGTACTTTTTTATGTACTAGTGGACTTGTGT
snp_sb001000118004	Chr1:68985478	68985478	Sobic.001G492300	Synonymous Variant	GAGGCCCACCTGGCAGGCGGCCTTCCCGAC	C	[T]	AATCTCTCCCGTCTCTCTCTCGGCTCTGCC	GAGGCCCACCTGGCAGGCGGCCTTCCCGACCAATCTCTCCCGTCTCTCTCTCGGCTCTGCC
snp_sb001000144922	Chr2:9797004	9797004	Sobic.002G094500	5' UTR Premature Start Codon Gain Variant	ACAGACTCAAACTATTCTTCACGCAGAAAA	G	[T]	AAAACAAAAGAAAAGTCTGGTTCCCAAAAG	ACAGACTCAAACTATTCTTCACGCAGAAAAGAAAACAAAAGAAAAGTCTGGTTCCCAAAAG
snp_sb001000144923	Chr2:9797941	9797941	Sobic.002G094500	5' UTR Premature Start Codon Gain Variant	TAGTATGTCACTGACAACAGCATGGACCAC	A	[T]	AGAGCATCTGAAACACATTTTATCCTTATC	TAGTATGTCACTGACAACAGCATGGACCACAAGAGCATCTGAAACACATTTTATCCTTATC
snp_sb001000144925	Chr2:9798136	9798136	Sobic.002G094500	5' UTR Premature Start Codon Gain Variant	CCCCTATGAGTTGTGACTTCTTGTTTTGCG	C	[T]	TGCTGCAGTTGTTGTTTGGTATTACAGTCA	CCCCTATGAGTTGTGACTTCTTGTTTTGCGCTGCTGCAGTTGTTGTTTGGTATTACAGTCA
snp_sb001000144926	Chr2:9804180	9804180	Sobic.002G094500	5' UTR Premature Start Codon Gain Variant	CAGTACGTAGAATATCTAGTACCAGTTGAC	T	[A]	TGGTACAGGCTGTCAGGAAAAATGAAGCTG	CAGTACGTAGAATATCTAGTACCAGTTGACTTGGTACAGGCTGTCAGGAAAAATGAAGCTG
snp_sb001000144928	Chr2:9806334	9806334	Sobic.002G094500	5' UTR Premature Start Codon Gain Variant	AGACACCTAGACAGCAGTTGTTTAACTTTG	A	[G]	AATAGTTTTGAGCATGCATAAATGTACTGC	AGACACCTAGACAGCAGTTGTTTAACTTTGAAATAGTTTTGAGCATGCATAAATGTACTGC
snp_sb001000329033	Chr3:60708763	60708763	Sobic.003G270200	5' UTR Variant	GACAACACTCACCGGCACGCAGACGCTCTC	A	[C]	GCAAGAGGCAAGAGGCCCGGCAAACAATGG	GACAACACTCACCGGCACGCAGACGCTCTCAGCAAGAGGCAAGAGGCCCGGCAAACAATGG
snp_sb001000482466	Chr4:61287427	61287427	Sobic.004G276400	5' UTR Premature Start Codon Gain Variant	GAACGGCGCGCGGGAGATGAGGAATAGCAC	A	[G]	GGGGAAGAGAGGAATCATGTACGGGAGGAG	GAACGGCGCGCGGGAGATGAGGAATAGCACAGGGGAAGAGAGGAATCATGTACGGGAGGAG
snp_sb001000482471	Chr4:61298475	61298475	Sobic.004G276400	Synonymous Variant	TAAGCATTCTCTTCGTGAATACCAGCATAT	A	[C]	GGGCTGGATTGGTTGGTTGCTATGTATGAG	TAAGCATTCTCTTCGTGAATACCAGCATATAGGGCTGGATTGGTTGGTTGCTATGTATGAG
snp_sb001000482472	Chr4:61298715	61298715	Sobic.004G276400	Synonymous Variant	AATACTGACTTATTTCGGAAGTGCAAAGGA	A	[G]	AGAAAGCAGAAACGTCAGGGCTGGATGAAA	AATACTGACTTATTTCGGAAGTGCAAAGGAAAGAAAGCAGAAACGTCAGGGCTGGATGAAA
snp_sb001000482473	Chr4:61300443	61300443	Sobic.004G276400	Synonymous Variant	TCGTGAAGTTCACATATATAGACTCATTAG	C	[T]	GAAAGCACTATAGAGGAGAACATTCTCAAG	TCGTGAAGTTCACATATATAGACTCATTAGCGAAAGCACTATAGAGGAGAACATTCTCAAG
snp_sb001000482474	Chr4:61300580	61300580	Sobic.004G276400	Missense variant	TTGATCCTATGGAGTTCTTTTCTGGGCACA	T	[C]	GTCTCTCCATGCGGAAGATCAGGAGAAAAA	TTGATCCTATGGAGTTCTTTTCTGGGCACATGTCTCTCCATGCGGAAGATCAGGAGAAAAA
snp_sb001000482475	Chr4:61302527	61302527	Sobic.004G276400	Missense variant	TTCCTTCTGGGACTGGAAAGGCTATACTTA	G	[A]	AGTATCTGAGGTGAGTTGATATCTTGTCTT	TTCCTTCTGGGACTGGAAAGGCTATACTTAGAGTATCTGAGGTGAGTTGATATCTTGTCTT
snp_sb001000482477	Chr4:61304099	61304099	Sobic.004G276400	Missense variant	TCTGAGGATCTCTTTCAAGAGGTTGACGAT	T	[C]	TTGAGTTCTTCCCAGATCAGGGTGACTCTG	TCTGAGGATCTCTTTCAAGAGGTTGACGATTTTGAGTTCTTCCCAGATCAGGGTGACTCTG
snp_sb001000482478	Chr4:61304786	61304786	Sobic.004G276400	3' UTR variant	GTCAGGAATCAATGCATGGTATCAATATTG	T	[C]	CAGAACTGGTATTCCAGTTTCACTTGAGGA	GTCAGGAATCAATGCATGGTATCAATATTGTCAGAACTGGTATTCCAGTTTCACTTGAGGA
snp_sb001000483659	Chr4:62051298	62051298	Sobic.004G284900	5' UTR Premature Start Codon Gain Variant	TCCATGATTGCATCTTTGGCATGTAACTGC	G	[A]	AGTTTAGTGAATGCACTTTAGCAGAATATG	TCCATGATTGCATCTTTGGCATGTAACTGCGAGTTTAGTGAATGCACTTTAGCAGAATATG
snp_sb001000483660	Chr4:62051735	62051735	Sobic.004G284900	5' UTR Premature Start Codon Gain Variant	ATCACATAATATGCTATCTGTCTGCCCTTC	A	[T]	AAATCATTTTCTAGAAGAATTATTTCTTCC	ATCACATAATATGCTATCTGTCTGCCCTTCAAAATCATTTTCTAGAAGAATTATTTCTTCC
snp_sb039055825657	Chr1:12214987	12214987	Sobic.001G152400	5' UTR Premature Start Codon Gain Variant	AAATCAAGACCTACCTAGTTCTTTTTTTTC	C	[A]	GAAGATCCGTTACTGCTTTCATTAATAAGA	AAATCAAGACCTACCTAGTTCTTTTTTTTCCGAAGATCCGTTACTGCTTTCATTAATAAGA
snp_sb039055825663	Chr1:12217118	12217118	Sobic.001G152400	5' UTR Premature Start Codon Gain Variant	AAATACACCTAGAAATATACTAAATGCATG	T	[C]	GTATACATTTAGGTAAGCAGAATCAGAATG	AAATACACCTAGAAATATACTAAATGCATGTGTATACATTTAGGTAAGCAGAATCAGAATG
snp_sb039055825665	Chr1:12218762	12218762	Sobic.001G152400	5' UTR Premature Start Codon Gain Variant	CCCATTCTTCTCTTCCGCGCCCGTAAAGAT	A	[G]	TGTTGCCCGTCATAGGGATCCATCTCAGGA	CCCATTCTTCTCTTCCGCGCCCGTAAAGATATGTTGCCCGTCATAGGGATCCATCTCAGGA
snp_sb039055825670	Chr1:12219227	12219227	Sobic.001G152400	5' UTR Premature Start Codon Gain Variant	GGAGTGGCGACCGGAGAAGGCGGGGTGACG	C	[T]	GGTCTCGCCGCGGACGCCGCGCTGTAACGC	GGAGTGGCGACCGGAGAAGGCGGGGTGACGCGGTCTCGCCGCGGACGCCGCGCTGTAACGC
snp_sb040057635746	Chr1:9953917	9953917	Sobic.001G127100	5' UTR Variant	GCCCAAACCCACATCTCGCCACACCCATAC	G	[A]	TTTCTACCCTAACACTGTGCGAAGGCACAA	GCCCAAACCCACATCTCGCCACACCCATACGTTTCTACCCTAACACTGTGCGAAGGCACAA
snp_sb040057635749	Chr1:9955780	9955780	Sobic.001G127100	5' UTR Premature Start Codon Gain Variant	GTGGGGGGGGGGGGGATTGGGTAAACTTTG	C	[T]	GTGCATTCTGTCAAAACCACCAAGGAACTG	GTGGGGGGGGGGGGGATTGGGTAAACTTTGCGTGCATTCTGTCAAAACCACCAAGGAACTG
snp_sb040057635750	Chr1:9956952	9956952	Sobic.001G127100	5' UTR Premature Start Codon Gain Variant	GTGTTGTGATTTGCTGGATCATCACCTTTT	G	[C]	TGTGTGCAATGTACTTTTAGCACACTGCTC	GTGTTGTGATTTGCTGGATCATCACCTTTTGTGTGTGCAATGTACTTTTAGCACACTGCTC
snp_sb040057637478	Chr1:10639367	10639367	Sobic.001G135300	5' UTR Premature Start Codon Gain Variant	GTCTCAAGCAAGTTAGGGTAGACTAGATGA	T	[C]	CCACCAAGATGGCAACATGTATTGTTCATA	GTCTCAAGCAAGTTAGGGTAGACTAGATGATCCACCAAGATGGCAACATGTATTGTTCATA
snp_sb042060170527	Chr1:253698	253698	Sobic.001G002600	5' UTR Premature Start Codon Gain Variant	GGAGGTGCCTCTACAGCTAGCATCAACGCA	T	[C]	GAGAAACACTAGGAGAAGCACTGAAGTGTA	GGAGGTGCCTCTACAGCTAGCATCAACGCATGAGAAACACTAGGAGAAGCACTGAAGTGTA
snp_sb042060259362	Chr1:58636068	58636068	Sobic.001G369600	5' UTR Premature Start Codon Gain Variant	TGATGAGGATGGACATTATGCATGATTATA	A	[T]	ATTAATGGGTGTTTAATTAAATATTGTCAT	TGATGAGGATGGACATTATGCATGATTATAAATTAATGGGTGTTTAATTAAATATTGTCAT
snp_sb042060259363	Chr1:58636518	58636518	Sobic.001G369600	Missense variant	ACGTTGGTCCGGGTGCTGCTGGAACTGCAA	A	[G]	AGAAGGACCCCGAGGCCTGCACGGATCAGC	ACGTTGGTCCGGGTGCTGCTGGAACTGCAAAAGAAGGACCCCGAGGCCTGCACGGATCAGC
snp_sb042060264701	Chr1:65696002	65696002	Sobic.001G452100	3' UTR variant	CACACATATAAACAAATCCCAACACACACA	C	[A]	AGTTAATGACAGCTGGACAAAGCTGAAACA	CACACATATAAACAAATCCCAACACACACACAGTTAATGACAGCTGGACAAAGCTGAAACA
snp_sb042060264709	Chr1:65696427	65696427	Sobic.001G452100	Synonymous Variant	AAATTAAACTTACCAGCCAGGGAAATCATA	C	[T]	GTATTGCGGTTTCCTTGAAGCATTGAGCCC	AAATTAAACTTACCAGCCAGGGAAATCATACGTATTGCGGTTTCCTTGAAGCATTGAGCCC
snp_sb042060264710	Chr1:65696587	65696587	Sobic.001G452100	5' UTR Premature Start Codon Gain Variant	AAACTAGTTATATATGGCTGGATCGGCATT	C	[A]	AACCTTTGGTCATAGCAGCCTGAGACAGTA	AAACTAGTTATATATGGCTGGATCGGCATTCAACCTTTGGTCATAGCAGCCTGAGACAGTA
snp_sb042060264711	Chr1:65696883	65696883	Sobic.001G452100	5' UTR Premature Start Codon Gain Variant	TCTTACAAACAAATTCCAAGCCAGTCCTTT	G	[A]	ATAAATAATAATACAAATAAAAAAGAAGTG	TCTTACAAACAAATTCCAAGCCAGTCCTTTGATAAATAATAATACAAATAAAAAAGAAGTG
snp_sb042060264715	Chr1:65698225	65698225	Sobic.001G452100	Splice Region Variant	AAGTAGAGGAAAGAGAGAGAGATCGAGGTG	T	[C]	GTACATGGCTTGGGAAGCTGCTCCTGCAGA	AAGTAGAGGAAAGAGAGAGAGATCGAGGTGTGTACATGGCTTGGGAAGCTGCTCCTGCAGA
snp_sb042060264720	Chr1:65698657	65698657	Sobic.001G452100	5' UTR Variant	TGCTGCGCTGGTATATCCGTCTCTCTACGT	G	[A]	CGCTCCGCTTGCTTTTTATAAAAGCTTCGC	TGCTGCGCTGGTATATCCGTCTCTCTACGTGCGCTCCGCTTGCTTTTTATAAAAGCTTCGC
snp_sb042060264721	Chr1:65698805	65698805	Sobic.001G452100	5' UTR Variant	CAGGGCCAAGAAGAACGCGTGGACGGCCGC	G	[T]	GGAGGCACCACGACAAGCACAGATTGTTGC	CAGGGCCAAGAAGAACGCGTGGACGGCCGCGGGAGGCACCACGACAAGCACAGATTGTTGC
snp_sb042060274617	Chr1:71086792	71086792	Sobic.001G516100	5' UTR Premature Start Codon Gain Variant	CTTAGATTACCCTGTCGAAAAGTCAGCAGA	C	[T]	AGCAACAGGAATGCTCTGGTCTTTACCTCA	CTTAGATTACCCTGTCGAAAAGTCAGCAGACAGCAACAGGAATGCTCTGGTCTTTACCTCA
snp_sb042060274619	Chr1:71089062	71089062	Sobic.001G516100	5' UTR Premature Start Codon Gain Variant	CATTAAAATTATACCATGTGTTCAATGCAG	T	[C]	CGCCATAATCTGATTCTATGGATTCACACA	CATTAAAATTATACCATGTGTTCAATGCAGTCGCCATAATCTGATTCTATGGATTCACACA
snp_sb042060276614	Chr1:72191310	72191310	Sobic.001G529800	5' UTR Premature Start Codon Gain Variant	TCGAACTGCATTTCTTTCTTCAAATTTGAT	C	[A]	TCTGTCCCAGACTTCATTTGGGATCTCATA	TCGAACTGCATTTCTTTCTTCAAATTTGATCTCTGTCCCAGACTTCATTTGGGATCTCATA
snp_sb042060276620	Chr1:72191525	72191525	Sobic.001G529800	5' UTR Premature Start Codon Gain Variant	GAAACAACAGGTCTTATACATAACTATACA	T	[G]	TCTGATGACCACATAAAATTAAGCATCCCT	GAAACAACAGGTCTTATACATAACTATACATTCTGATGACCACATAAAATTAAGCATCCCT
snp_sb042060276621	Chr1:72191616	72191616	Sobic.001G529800	5' UTR Premature Start Codon Gain Variant	ATCATCTGGGGTGTGCACTGATGGTAACCA	T	[C]	TGGTTCCAGGAAACAGGCACTATCTTTACT	ATCATCTGGGGTGTGCACTGATGGTAACCATTGGTTCCAGGAAACAGGCACTATCTTTACT
snp_sb042060276622	Chr1:72192055	72192055	Sobic.001G529800	Missense variant	AGAGAGCCATGGCATGACTTGCATTCCAAG	A	[C]	TCGATGGTCCAGCAGCATATGATGTCCTGA	AGAGAGCCATGGCATGACTTGCATTCCAAGATCGATGGTCCAGCAGCATATGATGTCCTGA
snp_sb042060276623	Chr1:72193891	72193891	Sobic.001G529800	5' UTR Premature Start Codon Gain Variant	ATCACAATTCGAATTGTGTTATTTTCCTTC	C	[T]	AAGAACACTTAAGAGATTTTTTTTGGTAAT	ATCACAATTCGAATTGTGTTATTTTCCTTCCAAGAACACTTAAGAGATTTTTTTTGGTAAT
snp_sb042060276624	Chr1:72193958	72193958	Sobic.001G529800	5' UTR Premature Start Codon Gain Variant	TAGATCTACGTATATTTTCATTAAGAAGAA	T	[A]	GTGGAGTTTACAATGCGGGCCAAACGAGTG	TAGATCTACGTATATTTTCATTAAGAAGAATGTGGAGTTTACAATGCGGGCCAAACGAGTG
snp_sb042060283458	Chr2:3773696	3773696	Sobic.002G038500	5' UTR Premature Start Codon Gain Variant	ACTCTATCTATATGAAACTTTTATCATCTC	C	[T]	TTTTATCAATACAATGTCATGTTAGCATAT	ACTCTATCTATATGAAACTTTTATCATCTCCTTTTATCAATACAATGTCATGTTAGCATAT
snp_sb042060283459	Chr2:3776191	3776191	Sobic.002G038500	5' UTR Variant	CGGGAGATCTGGGTCGGTCTAGGTTATAAG	G	[C]	TAGCTAGCGTGGTGGTGCCAACTGAATTGA	CGGGAGATCTGGGTCGGTCTAGGTTATAAGGTAGCTAGCGTGGTGGTGCCAACTGAATTGA
snp_sb042060286063	Chr2:4944558	4944558	Sobic.002G052000	3' UTR variant	AAATTGATTTGTCATTTTGTTTCCCAACAA	T	[A]	TAGTTTCGTAGCTATATATTTTGATCCAAA	AAATTGATTTGTCATTTTGTTTCCCAACAATTAGTTTCGTAGCTATATATTTTGATCCAAA
snp_sb042060287881	Chr2:5845156	5845156	Sobic.002G060800	3' UTR variant	ACAATAAGAGCAACAATGAGGGGCAGGAAC	G	[C]	ATGCACATTTCCGAGAGTGGTGATCGGAAG	ACAATAAGAGCAACAATGAGGGGCAGGAACGATGCACATTTCCGAGAGTGGTGATCGGAAG
snp_sb042060287882	Chr2:5846776	5846776	Sobic.002G060800	Synonymous Variant	ATCAGGTATCACCAACGGCATTTCTGACTC	T	[C]	GTAGACTTATTATGCATCTTGCGAGCTTCA	ATCAGGTATCACCAACGGCATTTCTGACTCTGTAGACTTATTATGCATCTTGCGAGCTTCA
snp_sb042060287884	Chr2:5848760	5848760	Sobic.002G060800	Synonymous Variant	GGAGATGACCCAGTCCCCGGACGGGAACCG	T	[C]	GCGATGGGGCGGCGGCCGAGGTCCATGACG	GGAGATGACCCAGTCCCCGGACGGGAACCGTGCGATGGGGCGGCGGCCGAGGTCCATGACG
snp_sb042060291465	Chr2:7235477	7235477	Sobic.002G071500	Synonymous Variant	AGTATGAGCAAGGATGGCTTGCTGTTGTTC	A	[C]	CCAGTGAGCTCCAAGAATTGCACAAGCATA	AGTATGAGCAAGGATGGCTTGCTGTTGTTCACCAGTGAGCTCCAAGAATTGCACAAGCATA
snp_sb042060291466	Chr2:7238050	7238050	Sobic.002G071500	5' UTR Premature Start Codon Gain Variant	AGAGCAACAGAGCCGCCCAACTCCAGATTT	T	[A]	TTTTGGGAAGATGTCTATTTTTGGCCAGCA	AGAGCAACAGAGCCGCCCAACTCCAGATTTTTTTTGGGAAGATGTCTATTTTTGGCCAGCA
snp_sb042060291470	Chr2:7244342	7244342	Sobic.002G071500	5' UTR Premature Start Codon Gain Variant	GCTGCTGCGGGGAAACATAGGAAGGGGATG	C	[T]	GCAGCAGCAAAGGCACACGAAGGCAGCAAA	GCTGCTGCGGGGAAACATAGGAAGGGGATGCGCAGCAGCAAAGGCACACGAAGGCAGCAAA
snp_sb042060291471	Chr2:7245279	7245279	Sobic.002G071500	5' UTR Premature Start Codon Gain Variant	ATAGCCACTCTTAGCTTCATTGAACCAAAA	T	[C]	CAGGGACTTGGTAATTTTTCTGGCCCAGCA	ATAGCCACTCTTAGCTTCATTGAACCAAAATCAGGGACTTGGTAATTTTTCTGGCCCAGCA
snp_sb042060291472	Chr2:7249260	7249260	Sobic.002G071500	5' UTR Premature Start Codon Gain Variant	GGAAACCGTGGTTAAAATTATAAATTTGCT	T	[C]	AGAACAAGAGATATTTTTTTCCTTTTTTGA	GGAAACCGTGGTTAAAATTATAAATTTGCTTAGAACAAGAGATATTTTTTTCCTTTTTTGA
snp_sb042060291473	Chr2:7249955	7249955	Sobic.002G071500	5' UTR Premature Start Codon Gain Variant	CAACTCAAGCATTTATCAGAATTTAGGAAT	A	[G]	TGGGTATTTACTCCATTCGCCTTCCAAAAG	CAACTCAAGCATTTATCAGAATTTAGGAATATGGGTATTTACTCCATTCGCCTTCCAAAAG
snp_sb042060291474	Chr2:7250769	7250769	Sobic.002G071500	5' UTR Premature Start Codon Gain Variant	AGATCAACAATTAATTAATCACTCACTTCC	G	[A]	AACACAGTTAGCGACCGATGTGTTGTGTAC	AGATCAACAATTAATTAATCACTCACTTCCGAACACAGTTAGCGACCGATGTGTTGTGTAC
snp_sb042060291475	Chr2:7251002	7251002	Sobic.002G071500	5' UTR Premature Start Codon Gain Variant	AGTTTCCTGAAGCAGAAAGCCAGTTAGATG	G	[A]	AACAGAAAACATGAACCAGCAAATGCATTA	AGTTTCCTGAAGCAGAAAGCCAGTTAGATGGAACAGAAAACATGAACCAGCAAATGCATTA
snp_sb042060318996	Chr2:20544905	20544905	Sobic.002G136200	5' UTR Variant	ATGTCTGAATAAACGATTGACATTCTTCAG	C	[T]	GGTAACATCTAATAGAGTAGAGTAGCTGCA	ATGTCTGAATAAACGATTGACATTCTTCAGCGGTAACATCTAATAGAGTAGAGTAGCTGCA
snp_sb042060319005	Chr2:20552283	20552283	Sobic.002G136200	5' UTR Premature Start Codon Gain Variant	CACGGTCCCTTTCCCCTCGATGTCGACCAC	C	[T]	GATCCGTCACCGAACCTCACAGTTCCAGTG	CACGGTCCCTTTCCCCTCGATGTCGACCACCGATCCGTCACCGAACCTCACAGTTCCAGTG
snp_sb042060319006	Chr2:20555295	20555295	Sobic.002G136200	Synonymous Variant	TGCTGAATTGACCGCCGGATTTTACAACCC	A	[T]	TGTAACCGTGATGGCTATGCTCCAATTGCT	TGCTGAATTGACCGCCGGATTTTACAACCCATGTAACCGTGATGGCTATGCTCCAATTGCT
snp_sb042060319007	Chr2:20555501	20555501	Sobic.002G136200	5' UTR Premature Start Codon Gain Variant	TTGCATTTCTTAGAAACAGCATACTAGCTG	A	[G]	TGTTTTGTATTCCCTAGTGAGCAAACACAT	TTGCATTTCTTAGAAACAGCATACTAGCTGATGTTTTGTATTCCCTAGTGAGCAAACACAT
snp_sb042060354353	Chr2:64706338	64706338	Sobic.002G262500	5' UTR Premature Start Codon Gain Variant	GACTTGTTAATGCCCAATGCTCAACCATTG	T	[A]	CATCTATCTAGAGAGAGGACCCTTTTGGAT	GACTTGTTAATGCCCAATGCTCAACCATTGTCATCTATCTAGAGAGAGGACCCTTTTGGAT
snp_sb042060354354	Chr2:64706622	64706622	Sobic.002G262500	Synonymous Variant	AAAAACAATTCGATGAATTCCAGCTGGTGG	T	[C]	CTTGGGCTTTCATAGGGGACTATTTCATTG	AAAAACAATTCGATGAATTCCAGCTGGTGGTCTTGGGCTTTCATAGGGGACTATTTCATTG
snp_sb042060354355	Chr2:64709073	64709073	Sobic.002G262500	5' UTR Premature Start Codon Gain Variant	TAAGGGGTTCTTGAACTACAAACATAAAAA	T	[C]	AATGTGCCAATTGCCAAGCAGCATTCATTT	TAAGGGGTTCTTGAACTACAAACATAAAAATAATGTGCCAATTGCCAAGCAGCATTCATTT
snp_sb042060357167	Chr2:68283591	68283591	Sobic.002G308700	5' UTR Premature Start Codon Gain Variant	TTCGGCATGTTACTTTCCTTTTCATTGAAC	T	[C]	TGACAACTTCCCTGTTATGATTACTTACAC	TTCGGCATGTTACTTTCCTTTTCATTGAACTTGACAACTTCCCTGTTATGATTACTTACAC
snp_sb042060357168	Chr2:68291629	68291629	Sobic.002G308700	Synonymous Variant	TACAGCCACCAGACGTTCTAACTCAACAGC	T	[G]	TTCCCGGGAATATCTGATGCAATGATGTCT	TACAGCCACCAGACGTTCTAACTCAACAGCTTTCCCGGGAATATCTGATGCAATGATGTCT
snp_sb042060386629	Chr3:14956039	14956039	Sobic.003G145100	5' UTR Premature Start Codon Gain Variant	CGAGAGAGCCCCCGCCGGCCGCCGCCGTCG	G	[A]	CGTCACGCATTGGTTTCGGGTGGGGACGCA	CGAGAGAGCCCCCGCCGGCCGCCGCCGTCGGCGTCACGCATTGGTTTCGGGTGGGGACGCA
snp_sb042060391562	Chr3:20258471	20258471	Sobic.003G163100	5' UTR Premature Start Codon Gain Variant	CTAGGATCAGGCGATGAAGATGGTTGTTGT	C	[G]	TTTTTGAATGGCCTTATGGTTTTGTGCTGC	CTAGGATCAGGCGATGAAGATGGTTGTTGTCTTTTTGAATGGCCTTATGGTTTTGTGCTGC
snp_sb042060391563	Chr3:20259829	20259829	Sobic.003G163100	5' UTR Premature Start Codon Gain Variant	CCCAATACACAAATGTCTTAGTTTTTTTTT	T	[A]	TAAAAAAACAAATAGATAATAAGGCATATT	CCCAATACACAAATGTCTTAGTTTTTTTTTTTAAAAAAACAAATAGATAATAAGGCATATT
snp_sb042060418893	Chr3:55010899	55010899	Sobic.003G215300	3' UTR variant	TTCGTCAAGTTCCATTTGAGCACCGAGCCA	G	[A]	GTCTGCTACTACTTAAACCGAAGATTGTTT	TTCGTCAAGTTCCATTTGAGCACCGAGCCAGGTCTGCTACTACTTAAACCGAAGATTGTTT
snp_sb042060418894	Chr3:55011075	55011075	Sobic.003G215300	3' UTR variant	GTGAGAAGATAGCAATTGATGGACTTCTAC	T	[C]	CGGGCATGTTAACTTTGCACAGTTGCTACA	GTGAGAAGATAGCAATTGATGGACTTCTACTCGGGCATGTTAACTTTGCACAGTTGCTACA
snp_sb042060418903	Chr3:55018060	55018060	Sobic.003G215300	5' UTR Premature Start Codon Gain Variant	TATATATAGGGGTTCACGAGATACGTGTGT	C	[G]	TTTAAGAAAACATGTATGTGATCGATGAGC	TATATATAGGGGTTCACGAGATACGTGTGTCTTTAAGAAAACATGTATGTGATCGATGAGC
snp_sb042060424136	Chr3:57508304	57508304	Sobic.003G236000	5' UTR Premature Start Codon Gain Variant	AAAACTCGCTGGTTTTGCTTGGCAATAGGA	G	[A]	TAAAAATCCACACCCCAGTATTTTCATATA	AAAACTCGCTGGTTTTGCTTGGCAATAGGAGTAAAAATCCACACCCCAGTATTTTCATATA
snp_sb042060424137	Chr3:57508477	57508477	Sobic.003G236000	5' UTR Premature Start Codon Gain Variant	ACCAGGTGACAGCAGGGTCATCTTGATAGA	C	[T]	CAACTTGAATCAATGTATATTATAGGATAT	ACCAGGTGACAGCAGGGTCATCTTGATAGACCAACTTGAATCAATGTATATTATAGGATAT
snp_sb042060424138	Chr3:57511008	57511008	Sobic.003G236000	5' UTR Premature Start Codon Gain Variant	CAAGTGTGGCCTTGCAGTTGAAGATGGAAA	T	[C]	GTCCAGAAAGTCTATGCTGGTTAAGTAAAT	CAAGTGTGGCCTTGCAGTTGAAGATGGAAATGTCCAGAAAGTCTATGCTGGTTAAGTAAAT
snp_sb042060424140	Chr3:57511211	57511211	Sobic.003G236000	5' UTR Premature Start Codon Gain Variant	TGAAATCAAATGTATAAGATTTGGACTTCA	T	[C]	ATCGTGAACTACAGATTTTTCAACAAAACT	TGAAATCAAATGTATAAGATTTGGACTTCATATCGTGAACTACAGATTTTTCAACAAAACT
snp_sb042060424141	Chr3:57512984	57512984	Sobic.003G236000	5' UTR Premature Start Codon Gain Variant	TCCTACAATTAAATTACACATCAAGAACAA	C	[A]	AACTTAAGTTGTATCTCACAGTATATGTGC	TCCTACAATTAAATTACACATCAAGAACAACAACTTAAGTTGTATCTCACAGTATATGTGC
snp_sb042060452067	Chr4:994490	994490	Sobic.004G011800	Start Lost	CTTCTTTCCCATTGCATCCAACATTTGATT	C	[T]	TGTGTGTATGTCTTGGTTTATTATTAATTT	CTTCTTTCCCATTGCATCCAACATTTGATTCTGTGTGTATGTCTTGGTTTATTATTAATTT
snp_sb042060454804	Chr4:2259986	2259986	Sobic.004G027800	3' UTR variant	GATTCGCAGCTGGGTAAACTGCTAGGTCCT	A	[G]	TTCAGTTGATTTCTGCTGAGCAGGTGCCTT	GATTCGCAGCTGGGTAAACTGCTAGGTCCTATTCAGTTGATTTCTGCTGAGCAGGTGCCTT
snp_sb042060463770	Chr4:7442685	7442685	Sobic.004G087700	5' UTR Premature Start Codon Gain Variant	GGAAAAAGAAAAAACTTGTCAAGTTCCTTC	A	[G]	GCTACTAATTCTTGTGAGATGTTCTTCTCA	GGAAAAAGAAAAAACTTGTCAAGTTCCTTCAGCTACTAATTCTTGTGAGATGTTCTTCTCA
snp_sb042060463773	Chr4:7442778	7442778	Sobic.004G087700	Synonymous Variant	GAGTGGGAAGAGACCTATCTCTATCCTTCA	C	[T]	GATATCAGTGGAATCATAAGACCGGGCAGA	GAGTGGGAAGAGACCTATCTCTATCCTTCACGATATCAGTGGAATCATAAGACCGGGCAGA
snp_sb042060463775	Chr4:7442939	7442939	Sobic.004G087700	5' UTR Premature Start Codon Gain Variant	TACTTTCTTGATTGTCAACCTCTTTTTCTT	A	[C]	AAAGAGATTGATTGTCGACTTCTAAATCCT	TACTTTCTTGATTGTCAACCTCTTTTTCTTAAAAGAGATTGATTGTCGACTTCTAAATCCT
snp_sb042060463777	Chr4:7445287	7445287	Sobic.004G087700	Synonymous Variant	TGTGCAGGTTGTCGATAGCACACAAAGCAA	C	[T]	GACACACTCGGTGTTGAAATCCTAAAGGCC	TGTGCAGGTTGTCGATAGCACACAAAGCAACGACACACTCGGTGTTGAAATCCTAAAGGCC
snp_sb042060479510	Chr4:13843677	13843677	Sobic.004G123100	3' UTR variant	GCGTAGTAGGTGGATGAAATCACCCGGCCC	T	[A]	CTTCTTCCCCTCATCTAGAATGTTCTAGAA	GCGTAGTAGGTGGATGAAATCACCCGGCCCTCTTCTTCCCCTCATCTAGAATGTTCTAGAA
snp_sb042060479511	Chr4:13844527	13844527	Sobic.004G123100	5' UTR Premature Start Codon Gain Variant	GCGCCGGCCATTGATCCATGGCCATCCATA	G	[A]	CTCCATATAATGAACAGCATCACAATTGCA	GCGCCGGCCATTGATCCATGGCCATCCATAGCTCCATATAATGAACAGCATCACAATTGCA
snp_sb042060479515	Chr4:13844963	13844963	Sobic.004G123100	5' UTR Premature Start Codon Gain Variant	CATGCCATGTTGGTTTGAGAGATCGAGGTG	A	[G]	CGATCTATCGACTGAATTGATTGATTGATC	CATGCCATGTTGGTTTGAGAGATCGAGGTGACGATCTATCGACTGAATTGATTGATTGATC
snp_sb042060479516	Chr4:13845399	13845399	Sobic.004G123100	Missense variant	GATAATCGTGCAAGCACGCAGCACTCACGA	T	[G]	GAGCATGGCGTCGAGCTTCCGCAGCGCGGG	GATAATCGTGCAAGCACGCAGCACTCACGATGAGCATGGCGTCGAGCTTCCGCAGCGCGGG
snp_sb042060479618	Chr4:13910122	13910122	Sobic.004G123400	5' UTR Premature Start Codon Gain Variant	AGGCCAAGCTCAACTCGTGTACGTACAACG	G	[A]	AACACAGCAAGATACGTACAGTCGCCGCCG	AGGCCAAGCTCAACTCGTGTACGTACAACGGAACACAGCAAGATACGTACAGTCGCCGCCG
snp_sb042060479620	Chr4:13912341	13912341	Sobic.004G123400	5' UTR Premature Start Codon Gain Variant	AGAACACATGCAAACTATTATTCTACAAAG	C	[T]	ACCCAACAGTATGTGAAAGAAATATGGTTT	AGAACACATGCAAACTATTATTCTACAAAGCACCCAACAGTATGTGAAAGAAATATGGTTT
snp_sb042060479621	Chr4:13914146	13914146	Sobic.004G123400	5' UTR Premature Start Codon Gain Variant	CAGCAGCAGAAACGTGCAGTACAACCGTAC	G	[A]	CGCATGCGTGCGTGTACCCTGCTTTTCTGG	CAGCAGCAGAAACGTGCAGTACAACCGTACGCGCATGCGTGCGTGTACCCTGCTTTTCTGG
snp_sb042060479622	Chr4:13915379	13915379	Sobic.004G123400	5' UTR Premature Start Codon Gain Variant	TGTTTTTAACATACCAACTAAATAGACGTA	G	[A]	TGAGATACAGACAAAAAATATTTAGAATAT	TGTTTTTAACATACCAACTAAATAGACGTAGTGAGATACAGACAAAAAATATTTAGAATAT
snp_sb042060479628	Chr4:13918569	13918569	Sobic.004G123400	5' UTR Premature Start Codon Gain Variant	TCAAAGATGACATCCTGCGACACGCGCACT	C	[T]	GCTGTGTTGCTGGGTCGAGCACAAGGTAGG	TCAAAGATGACATCCTGCGACACGCGCACTCGCTGTGTTGCTGGGTCGAGCACAAGGTAGG
snp_sb042060479630	Chr4:13919117	13919117	Sobic.004G123400	5' UTR Premature Start Codon Gain Variant	GGTGGTCAGCAGTGCCACCCACATGTATCG	T	[C]	GTGGCATCGTCAACGAGCAGCAGGAAGTAG	GGTGGTCAGCAGTGCCACCCACATGTATCGTGTGGCATCGTCAACGAGCAGCAGGAAGTAG
snp_sb042060479631	Chr4:13919408	13919408	Sobic.004G123400	5' UTR Premature Start Codon Gain Variant	GCACTCATGCCAGCGCCATGCTTCGTCATC	C	[G]	TTGCGCGTGGCGAGGCAGAGTGGCTTTGCC	GCACTCATGCCAGCGCCATGCTTCGTCATCCTTGCGCGTGGCGAGGCAGAGTGGCTTTGCC
snp_sb042060479632	Chr4:13922676	13922676	Sobic.004G123400	5' UTR Premature Start Codon Gain Variant	TATTCCCATAAAAAGAAGTGGAAAGGGAGT	G	[A]	CTAGTAATACGAAATGCCTATACTCAGAAA	TATTCCCATAAAAAGAAGTGGAAAGGGAGTGCTAGTAATACGAAATGCCTATACTCAGAAA
snp_sb042060479633	Chr4:13922807	13922807	Sobic.004G123400	5' UTR Premature Start Codon Gain Variant	GATTCTCTAAGAATCAAGCTTCCATAGCAT	G	[A]	ATACCAAGTCCTAATGCTGCAGAAGAAAAA	GATTCTCTAAGAATCAAGCTTCCATAGCATGATACCAAGTCCTAATGCTGCAGAAGAAAAA
snp_sb042060524112	Chr4:59356206	59356206	Sobic.004G254100	5' UTR Premature Start Codon Gain Variant	GGTTGTTCCATTTTCACAAAGATAAAAAAA	T	[A]	TTTTTGCAATCTCTTGCAGATGGAAGTTAG	GGTTGTTCCATTTTCACAAAGATAAAAAAATTTTTTGCAATCTCTTGCAGATGGAAGTTAG
snp_sb042060524400	Chr4:60341689	60341689	Sobic.004G265700	3' UTR variant	TGTTAAATACCCAATATGATAGAAACTAAA	T	[A]	TTTAGTTTTGGAGACCAAACACTTGGCAGC	TGTTAAATACCCAATATGATAGAAACTAAATTTTAGTTTTGGAGACCAAACACTTGGCAGC
snp_sb042060524403	Chr4:60342059	60342059	Sobic.004G265700	3' UTR variant	CATTCCAAATTTTCTCCGTTGAATACAAAG	A	[C]	TGGATGTCCTCTCAGGCCTTGTTTGGAACT	CATTCCAAATTTTCTCCGTTGAATACAAAGATGGATGTCCTCTCAGGCCTTGTTTGGAACT
snp_sb042060524405	Chr4:60342870	60342870	Sobic.004G265700	5' UTR Premature Start Codon Gain Variant	TACTGTTAAAGTACACATGATCACAGAAGT	C	[A]	TAGTTATTGCCCTTAACTCAAACAGTTTGA	TACTGTTAAAGTACACATGATCACAGAAGTCTAGTTATTGCCCTTAACTCAAACAGTTTGA
snp_sb042060524406	Chr4:60343404	60343404	Sobic.004G265700	5' UTR Premature Start Codon Gain Variant	TACATAGTTACAGGTGCAACTATAATCAAA	G	[T]	CATACATTGCGATGGCATAACATGTCCATA	TACATAGTTACAGGTGCAACTATAATCAAAGCATACATTGCGATGGCATAACATGTCCATA
snp_sb042060528782	Chr4:66899297	66899297	Sobic.004G346100	5' UTR Premature Start Codon Gain Variant	GTAACAAAGATGACAGGATTATGACTCTGT	C	[T]	CGCTTGTCTTATAAGTCGTACTGAATTTGA	GTAACAAAGATGACAGGATTATGACTCTGTCCGCTTGTCTTATAAGTCGTACTGAATTTGA
snp_sb042060747207	Chr6:54602914	54602914	Sobic.006G181900	5' UTR Variant	GTGTAGTAGGATAGATAGGAGGGAGGGATG	C	[A]	AGGTAGACGTGTTTGGAGCGAGGAACTCAG	GTGTAGTAGGATAGATAGGAGGGAGGGATGCAGGTAGACGTGTTTGGAGCGAGGAACTCAG
snp_sb042060878228	Chr8:9514177	9514177	Sobic.008G071400	5' UTR Premature Start Codon Gain Variant	CCAAACAAAAAGAGAGAAAGGTTTCATTTG	A	[C]	AAAAAAAAAAGTTTCTGTACACTGTATACT	CCAAACAAAAAGAGAGAAAGGTTTCATTTGAAAAAAAAAAAGTTTCTGTACACTGTATACT
snp_sb042060878229	Chr8:9514487	9514487	Sobic.008G071400	5' UTR Premature Start Codon Gain Variant	TGCTTCTGCAGCAGCTCCTTCTGCTGCTAC	G	[A]	TTACGTGCGTGGATATGGCAAACCCCAAGC	TGCTTCTGCAGCAGCTCCTTCTGCTGCTACGTTACGTGCGTGGATATGGCAAACCCCAAGC
snp_sb042060878230	Chr8:9516103	9516103	Sobic.008G071400	3' UTR variant	GCATGCGTTGTCGTTAATTAAGCTTGGTTA	A	[G]	TTAGCTGCTGGTAGTAAGTGTTAGGGTCGT	GCATGCGTTGTCGTTAATTAAGCTTGGTTAATTAGCTGCTGGTAGTAAGTGTTAGGGTCGT
snp_sb042061033830	Chr10:16591	16591	Sobic.010G000100	Stop Gained	CATCCTTGTATTTGTAGGATTATGGAAATG	T	[A]	AGCTCGTACAAGTTGTTTCATTAGCAGCTA	CATCCTTGTATTTGTAGGATTATGGAAATGTAGCTCGTACAAGTTGTTTCATTAGCAGCTA
snp_sb042061099726	Chr10:58640610	58640610	Sobic.010G248500	Missense variant	ATCATTATTTCCAATGGCAGTTCCTCTACG	C	[T]	TGCTGAATTTGAGATCCAAAACTTGTAGGT	ATCATTATTTCCAATGGCAGTTCCTCTACGCTGCTGAATTTGAGATCCAAAACTTGTAGGT
snp_sb042061099727	Chr10:58640998	58640998	Sobic.010G248500	Missense variant	GTTTAGCAATGGCCGAAGTTACCTCTCGCA	T	[C]	AAGATCGTGCATCAGAAATGTTCTAGCCCT	GTTTAGCAATGGCCGAAGTTACCTCTCGCATAAGATCGTGCATCAGAAATGTTCTAGCCCT
snp_sb042061102446	Chr10:61013262	61013262	Sobic.010G279200	Synonymous Variant	GGCCTTGCCGCGGAGGGACGCGGAAGCGGC	T	[G]	ACGGCGACTGATAGCTGCGGTGAGGGACGG	GGCCTTGCCGCGGAGGGACGCGGAAGCGGCTACGGCGACTGATAGCTGCGGTGAGGGACGG
snp_sb043061192543	Chr1:12518871	12518871	Sobic.001G155200	5' UTR Premature Start Codon Gain Variant	GATCCAGCATCCTGAAGCTGTGTTTTGCTA	T	[C]	AAATAGTGATCTTGTGCTTAATTTTGATTC	GATCCAGCATCCTGAAGCTGTGTTTTGCTATAAATAGTGATCTTGTGCTTAATTTTGATTC
snp_sb043061273536	Chr1:49734084	49734084	Sobic.001G292100	Missense variant	CAGAGACTTGTAGCCGGCGGCAGGCCTAAC	A	[T]	GCGGACAGCGCCGGCACAAGCTCGTCCAGC	CAGAGACTTGTAGCCGGCGGCAGGCCTAACAGCGGACAGCGCCGGCACAAGCTCGTCCAGC
snp_sb043061305266	Chr1:60347517	60347517	Sobic.001G388300	5' UTR Premature Start Codon Gain Variant	GCCCCTAGTGCTCCATGACACACCAAAATC	C	[T]	GCCATCCGTGTGCATTAGGGTTATGCTGGT	GCCCCTAGTGCTCCATGACACACCAAAATCCGCCATCCGTGTGCATTAGGGTTATGCTGGT
snp_sb043061309034	Chr1:62255805	62255805	Sobic.001G411600	5' UTR Premature Start Codon Gain Variant	TGGTGTTGCCTATATAGTGTGTCTACTGAG	G	[A]	ATTTGTATATGAAGAGCACGGTCTGGTTCC	TGGTGTTGCCTATATAGTGTGTCTACTGAGGATTTGTATATGAAGAGCACGGTCTGGTTCC
snp_sb043061309036	Chr1:62256585	62256585	Sobic.001G411600	5' UTR Premature Start Codon Gain Variant	ACGTATGTTTTGTACCTTTGCATTTTATAT	G	[T]	TCTAATTTCCCTTGGCTATTTAAACAAACA	ACGTATGTTTTGTACCTTTGCATTTTATATGTCTAATTTCCCTTGGCTATTTAAACAAACA
snp_sb043061309038	Chr1:62257595	62257595	Sobic.001G411600	5' UTR Premature Start Codon Gain Variant	ATGTTTGTGTGCTGAAACCATATAATTCTT	T	[C]	GTTGCTATTTCGTTGCTCAAAAAGACTAGA	ATGTTTGTGTGCTGAAACCATATAATTCTTTGTTGCTATTTCGTTGCTCAAAAAGACTAGA
snp_sb043061309039	Chr1:62257765	62257765	Sobic.001G411600	5' UTR Premature Start Codon Gain Variant	GATGATAGCGCTGTTGCTAGTCCGTTAGTC	G	[C]	AATGAAAATATATTTGTTTTCTTTCATTTC	GATGATAGCGCTGTTGCTAGTCCGTTAGTCGAATGAAAATATATTTGTTTTCTTTCATTTC
snp_sb043061309040	Chr1:62259293	62259293	Sobic.001G411600	5' UTR Premature Start Codon Gain Variant	GATTAAATTCTTACCACACTTTTAATCTAA	G	[A]	GTGCTGGACTATTCTAAAAGATCCGAATAT	GATTAAATTCTTACCACACTTTTAATCTAAGGTGCTGGACTATTCTAAAAGATCCGAATAT
snp_sb043061309049	Chr1:62259747	62259747	Sobic.001G411600	5' UTR Premature Start Codon Gain Variant	TACATGCCGTGACCTTTATTTTACTGTATG	T	[G]	TTTCAGGCTCTCAACTTTCTCCGCAGACGG	TACATGCCGTGACCTTTATTTTACTGTATGTTTTCAGGCTCTCAACTTTCTCCGCAGACGG
snp_sb043061310046	Chr1:62662659	62662659	Sobic.001G417500	3' UTR variant	TATTCCAGACTAGAACAAATTTGTTGTAAC	A	[T]	TTCAGTTCAGCTTAGATAAACTTGGCGTGT	TATTCCAGACTAGAACAAATTTGTTGTAACATTCAGTTCAGCTTAGATAAACTTGGCGTGT
snp_sb043061310048	Chr1:62663903	62663903	Sobic.001G417500	5' UTR Premature Start Codon Gain Variant	CATGTAGAATCATATTACATGAGATAGTCG	A	[G]	CAATATCAGTTATAGAGTGTCTGGTTCAAG	CATGTAGAATCATATTACATGAGATAGTCGACAATATCAGTTATAGAGTGTCTGGTTCAAG
snp_sb043061310049	Chr1:62665157	62665157	Sobic.001G417500	5' UTR Premature Start Codon Gain Variant	ATGTAAAGATGCAAATTTTCATATAAAGGA	G	[A]	CTCACCTGATCCTATCAATCTATCGATAAA	ATGTAAAGATGCAAATTTTCATATAAAGGAGCTCACCTGATCCTATCAATCTATCGATAAA
snp_sb043061310051	Chr1:62667149	62667149	Sobic.001G417500	5' UTR Premature Start Codon Gain Variant	CAGAGTCATCTTCCAACAAGGTGAACTGAT	C	[G]	GTAAATTATTGCAGCAGGATACCCTCTTTT	CAGAGTCATCTTCCAACAAGGTGAACTGATCGTAAATTATTGCAGCAGGATACCCTCTTTT
snp_sb043061434025	Chr2:58634397	58634397	Sobic.002G197300	Synonymous Variant	GGAGGATGATTCTGAGGAGGTGGAGCTGGA	T	[C]	GAGGAAGATGAGGAGGAAGTTGTCGCAGTG	GGAGGATGATTCTGAGGAGGTGGAGCTGGATGAGGAAGATGAGGAGGAAGTTGTCGCAGTG
snp_sb043061434026	Chr2:58635039	58635039	Sobic.002G197300	5' UTR Premature Start Codon Gain Variant	CTAATGAAAGCAAAGAATTGGTATGCTTGA	T	[A]	TAAATCTTTAGGGGCTATGCATTTCTTTTT	CTAATGAAAGCAAAGAATTGGTATGCTTGATTAAATCTTTAGGGGCTATGCATTTCTTTTT
snp_sb043061434027	Chr2:58636763	58636763	Sobic.002G197300	Missense variant	TTGAGCCACTTGCATGCTCGGGGCTCATCA	A	[G]	CAATATCCGAAAGAATATGATACTTGATGC	TTGAGCCACTTGCATGCTCGGGGCTCATCAACAATATCCGAAAGAATATGATACTTGATGC
snp_sb043061434030	Chr2:58639270	58639270	Sobic.002G197300	5' UTR Premature Start Codon Gain Variant	CTGTCTGTTTAAATCTAACTAAAATCAGGG	C	[T]	CTGAAGTGCTTATTTTCTATCTACATATAT	CTGTCTGTTTAAATCTAACTAAAATCAGGGCCTGAAGTGCTTATTTTCTATCTACATATAT
snp_sb043061434031	Chr2:58640668	58640668	Sobic.002G197300	5' UTR Premature Start Codon Gain Variant	TAATTGTAAATAAGTACATAAATGTATCAT	T	[A]	TAACTGAGCTACTACTGTTGTATACATTTG	TAATTGTAAATAAGTACATAAATGTATCATTTAACTGAGCTACTACTGTTGTATACATTTG
snp_sb043061434043	Chr2:58643800	58643800	Sobic.002G197300	3' UTR variant	TTCAGCGTCTACAGCTTACTATCCCTTCCA	G	[A]	CAATTTTGTGCGCTCTCTGATTCTCCTACC	TTCAGCGTCTACAGCTTACTATCCCTTCCAGCAATTTTGTGCGCTCTCTGATTCTCCTACC
snp_sb043061434049	Chr2:58643969	58643969	Sobic.002G197300	3' UTR variant	GAGACGTGGAAAAACATCCCTGATTGTAAC	C	[T]	TACATGAAAGGTTTATATGGTTTCTAGAAG	GAGACGTGGAAAAACATCCCTGATTGTAACCTACATGAAAGGTTTATATGGTTTCTAGAAG
snp_sb043061440761	Chr2:60562396	60562396	Sobic.002G213600	3' UTR variant	CAATGTCTTGGTCTTTGACACTAGCCATCA	C	[T]	GCAAAGGAATCCCTTTTCTTCAAAAATAAT	CAATGTCTTGGTCTTTGACACTAGCCATCACGCAAAGGAATCCCTTTTCTTCAAAAATAAT
snp_sb043061834685	Chr4:59002164	59002164	Sobic.004G250400	3' UTR variant	GTTACATTATGAACATTTTCGACCTAAGTT	G	[A]	ACTACTGTACATATTTGACCAGGGTTTTTT	GTTACATTATGAACATTTTCGACCTAAGTTGACTACTGTACATATTTGACCAGGGTTTTTT
snp_sb043061837420	Chr4:60161854	60161854	Sobic.004G263600	3' UTR variant	AAACGAACAAGCCCTCACGAAAGCAGCAAG	G	[C]	ATAATTTTAGGAAAAGAAAATGAATTTTGT	AAACGAACAAGCCCTCACGAAAGCAGCAAGGATAATTTTAGGAAAAGAAAATGAATTTTGT
snp_sb043061837421	Chr4:60162000	60162000	Sobic.004G263600	3' UTR variant	TATATCTACATGCAAACTAATACTGCCTTC	T	[G]	AAGAGCCATTCACAGAGATCTATCTGGATA	TATATCTACATGCAAACTAATACTGCCTTCTAAGAGCCATTCACAGAGATCTATCTGGATA
snp_sb043061845789	Chr4:64331382	64331382	Sobic.004G313400	5' UTR Premature Start Codon Gain Variant	TTACATGATTATTATGTTATTTTAACACAC	G	[A]	ATCTCAGGGTTTCCTTTCTCGTGAGATTCT	TTACATGATTATTATGTTATTTTAACACACGATCTCAGGGTTTCCTTTCTCGTGAGATTCT
snp_sb043061845790	Chr4:64334094	64334094	Sobic.004G313400	5' UTR Premature Start Codon Gain Variant	TTTCTCTTATGTTTAGTTCTAATATTTATT	A	[G]	TGCAAATATATAGTTAAGAGGGAGGATATC	TTTCTCTTATGTTTAGTTCTAATATTTATTATGCAAATATATAGTTAAGAGGGAGGATATC
snp_sb043061845791	Chr4:64336022	64336022	Sobic.004G313400	3' UTR variant	CTGCACAGTAGAGATTATTAGTTCACGATC	G	[T]	AACTTAGCATAGTTTAATTGGTTGCTCAAA	CTGCACAGTAGAGATTATTAGTTCACGATCGAACTTAGCATAGTTTAATTGGTTGCTCAAA
snp_sb043062581969	Chr9:54977043	54977043	Sobic.009G199900	5' UTR Premature Start Codon Gain Variant	ACTAAGTTAGTGTCTTTCATGATATTACTA	C	[T]	GCATGTAAGCGCTAAGCTGGCATATTGCAT	ACTAAGTTAGTGTCTTTCATGATATTACTACGCATGTAAGCGCTAAGCTGGCATATTGCAT
snp_sb043062581970	Chr9:54977356	54977356	Sobic.009G199900	5' UTR Premature Start Codon Gain Variant	TAAAAAGAACCAAATCTAGGAAGAGTGAAA	T	[C]	GTATTGCACTTTATTTACCAGTGCAAGTAC	TAAAAAGAACCAAATCTAGGAAGAGTGAAATGTATTGCACTTTATTTACCAGTGCAAGTAC
snp_sb043062581971	Chr9:54977452	54977452	Sobic.009G199900	5' UTR Premature Start Codon Gain Variant	CGGGTCAATCAGTACCTTCTCAAGTCAAAG	A	[T]	CAAACAAGTTAGCATATAGACATGTTGATA	CGGGTCAATCAGTACCTTCTCAAGTCAAAGACAAACAAGTTAGCATATAGACATGTTGATA
snp_sb043062581973	Chr9:54977545	54977545	Sobic.009G199900	5' UTR Premature Start Codon Gain Variant	GAATTTTTTCAAACTAATACTGATAAATCC	T	[A]	CTACAAAGTGCACAATACTTTTATGTGTTA	GAATTTTTTCAAACTAATACTGATAAATCCTCTACAAAGTGCACAATACTTTTATGTGTTA
snp_sb043062597302	Chr10:2271728	2271728	Sobic.010G027700	3' UTR variant	CTGCTCGCTGCTACCAGCAGCTACACCTAC	A	[T]	AGCTAGCTAGCTAGCTTGGCGAGAGAGAGC	CTGCTCGCTGCTACCAGCAGCTACACCTACAAGCTAGCTAGCTAGCTTGGCGAGAGAGAGC
snp_sb043062597303	Chr10:2272024	2272024	Sobic.010G027700	3' UTR variant	GCTATTGTACGTGTAGCTAGCTGTTGGCCG	G	[C]	TGCTGCATGCATGCATGTACGTTGTTTGTG	GCTATTGTACGTGTAGCTAGCTGTTGGCCGGTGCTGCATGCATGCATGTACGTTGTTTGTG
snp_sb043062597304	Chr10:2272492	2272492	Sobic.010G027700	3' UTR variant	CATGTGTCAATATGTGTGTGATATATCGAT	C	[G]	GATTGTGAAATAAATGAGGAAATCAGTGGG	CATGTGTCAATATGTGTGTGATATATCGATCGATTGTGAAATAAATGAGGAAATCAGTGGG
snp_sb043062622847	Chr10:10926388	10926388	Sobic.010G110000	Synonymous Variant	CGCAGCATCGTGAACACCCAGAGCAGCACG	A	[C]	CCAGATGGATCAAGGTTCTTGGACCAGGAT	CGCAGCATCGTGAACACCCAGAGCAGCACGACCAGATGGATCAAGGTTCTTGGACCAGGAT
snp_sb043062622852	Chr10:10926754	10926754	Sobic.010G110000	Missense variant	GTTGTGGGTGTGTTCTCTGGGTAAACAAAG	C	[T]	TAGCATTCATCATCATGGAATCCGTGACCT	GTTGTGGGTGTGTTCTCTGGGTAAACAAAGCTAGCATTCATCATCATGGAATCCGTGACCT

## Sheet: Sheet2
Supplementary Table 3: List of functionally annotated genes containing SNPs included SNPs in the present study
Sobic.001G017500	Org_Sbicolor	CDS:	Sobic.001G017500.1.p	(PAC:37943263)
Sobic.001G127100	Org_Sbicolor	CDS:	Sobic.001G127100.1.p	(1 of 2) K04711 - dihydroceramidase (ACER3, YDC1) (PAC:37939992)
Sobic.001G135300	Org_Sbicolor	CDS:	Sobic.001G135300.2.p	(1 of 1) PTHR23424 - SERUM AMYLOID A (PAC:37940399)
Sobic.001G152400	Org_Sbicolor	CDS:	Sobic.001G152400.2.p	(1 of 1200) 2.7.11.1 - Non-specific serine/threonine protein kinase /Threonine-specific protein kinase (PAC:37943301)
Sobic.001G152700	Org_Sbicolor	CDS:	Sobic.001G152700.1.p	(1 of 68) PF07762 - Protein of unknown function (DUF1618) (DUF1618) (PAC:37942897)
Sobic.001G155200	Org_Sbicolor	CDS:	Sobic.001G155200.2.p	(1 of 14) PF11955 - Plant organelle RNA recognition domain (PORR) (PAC:37943602)
Sobic.001G292100	Org_Sbicolor	CDS:	Sobic.001G292100.2.p	(1 of 8) PF05703 - Auxin canalisation (Auxin_canalis) (PAC:37943064)
Sobic.001G369600	Org_Sbicolor	CDS:	Sobic.001G369600.3.p	(1 of 12) 1.14.13.89 - Isoflavone 2'-hydroxylase / Isoflavone 2'-monooxygenase (PAC:37940169)
Sobic.001G388300	Org_Sbicolor	CDS:	Sobic.001G388300.2.p	(PAC:37939491)
Sobic.001G411600	Org_Sbicolor	CDS:	Sobic.001G411600.1.p	(1 of 22) K04733 - interleukin-1 receptor-associated kinase 4 (IRAK4)(PAC:37940200)
Sobic.001G417500	Org_Sbicolor	CDS:	Sobic.001G417500.4.p	(1 of 2) PTHR24098:SF12 - ACYL-COA N-ACYLTRANSFERASE WITH RING/FYVE/PHD-TYPE ZINC FINGER DOMAIN-CONTAINING PROTEIN (PAC:37939985)
Sobic.001G452100	Org_Sbicolor	CDS:	Sobic.001G452100.2.p	(1 of 2) PTHR31495:SF3 - CALEOSIN-RELATED FAMILY PROTEIN-RELATED (PAC:37940063)
Sobic.001G492300	Org_Sbicolor	CDS:	Sobic.001G492300.1.p	(1 of 1) PTHR11668//PTHR11668:SF265 - SERINE/THREONINE PROTEIN PHOSPHATASE // SUBFAMILY NOT NAMED (PAC:37942871)
Sobic.001G516100	Org_Sbicolor	CDS:	Sobic.001G516100.1.p	(PAC:37939997)
Sobic.001G529800	Org_Sbicolor	CDS:	Sobic.001G529800.1.p	(1 of 1) PTHR18896//PTHR18896:SF61 - PHOSPHOLIPASE D // SUBFAMILY NOTNAMED (PAC:37940435)
Sobic.002G038500	Org_Sbicolor	CDS:	Sobic.002G038500.3.p	(1 of 3) PTHR12632//PTHR12632:SF9 - TRANSCRIPTION FACTOR NF-Y ALPHA-RELATED // SUBFAMILY NOT NAMED (PAC:37955532)
Sobic.002G052000	Org_Sbicolor	CDS:	Sobic.002G052000.2.p	(1 of 2) PTHR14154:SF5 - EARLY LIGHT-INDUCED PROTEIN 1, CHLOROPLASTIC-RELATED (PAC:37955112)
Sobic.002G060800	Org_Sbicolor	CDS:	Sobic.002G060800.1.p	(1 of 2) PTHR20953:SF2 - PROTEIN SEEDLING PLASTID DEVELOPMENT 1 (PAC:37950478)
Sobic.002G071500	Org_Sbicolor	CDS:	Sobic.002G071500.1.p	(1 of 1) PTHR10644:SF6 - CLEAVAGE AND POLYADENYLATION SPECIFICITY FACTOR (CPSF) A SUBUNIT PROTEIN (PAC:37955429)
Sobic.002G094500	Org_Sbicolor	CDS:	Sobic.002G094500.1.p	(1 of 119) KOG0157 - Cytochrome P450 CYP4/CYP19/CYP26 subfamilies (PAC:37950054)
Sobic.002G136200	Org_Sbicolor	CDS:	Sobic.002G136200.2.p	(1 of 1) PTHR31352:SF2 - BETA-AMYLASE 7 (PAC:37955521)
Sobic.002G197300	Org_Sbicolor	CDS:	Sobic.002G197300.1.p	(1 of 1) PTHR11361:SF89 - DNA MISMATCH REPAIR PROTEIN MSH6 (PAC:37950295)
Sobic.002G213600	Org_Sbicolor	CDS:	Sobic.002G213600.1.p	(1 of 2) PTHR31374:SF22 - AUXIN-RESPONSIVE PROTEIN-LIKE PROTEIN-RELATED (PAC:37949917)
Sobic.002G262500	Org_Sbicolor	CDS:	Sobic.002G262500.1.p	(PAC:37953588)
Sobic.002G308700	Org_Sbicolor	CDS:	Sobic.002G308700.1.p	(1 of 1) PTHR10799//PTHR10799:SF625 - SWI/SNF-RELATED MATRIX-ASSOCIATED ACTIN-DEPENDENT REGULATOR OF CHROMATIN SUBFAMILY-RELATED // SUBFAMILY NOT NAMED (PAC:37950366)
Sobic.003G145100	Org_Sbicolor	CDS:	Sobic.003G145100.2.p	(1 of 1) PTHR10641:SF651 - DNA-BINDING PROTEIN-RELATED (PAC:37912743)
Sobic.003G163100	Org_Sbicolor	CDS:	Sobic.003G163100.1.p	(PAC:37912509)
Sobic.003G215300	Org_Sbicolor	CDS:	Sobic.003G215300.2.p	(1 of 18) 3.6.3.25 - Sulfate-transporting ATPase (PAC:37912861)
Sobic.003G236000	Org_Sbicolor	CDS:	Sobic.003G236000.2.p	(1 of 1) PTHR24055//PTHR24055:SF208 - MITOGEN-ACTIVATED PROTEIN KINASE // SUBFAMILY NOT NAMED (PAC:37912484)
Sobic.003G270200	Org_Sbicolor	CDS:	Sobic.003G270200.1.p	(1 of 4) PF00257 - Dehydrin (Dehydrin) (PAC:37912890)
Sobic.004G011800	Org_Sbicolor	CDS:	Sobic.004G011800.1.p	(1 of 30) PF03169 - OPT oligopeptide transporter protein (OPT) (PAC:37930067)
Sobic.004G027800	Org_Sbicolor	CDS:	Sobic.004G027800.2.p	(1 of 1) PTHR31352:SF8 - BETA-AMYLASE 8 (PAC:37930370)
Sobic.004G087700	Org_Sbicolor	CDS:	Sobic.004G087700.1.p	(PAC:37930373)
Sobic.004G123100	Org_Sbicolor	CDS:	Sobic.004G123100.2.p	(1 of 1) PTHR33101:SF10 - RHO GUANINE NUCLEOTIDE EXCHANGE FACTOR 8-RELATED (PAC:37930417)
Sobic.004G123400	Org_Sbicolor	CDS:	Sobic.004G123400.2.p	(1 of 1) K09420 - myb proto-oncogene protein (MYB) (PAC:37930035)
Sobic.004G250400	Org_Sbicolor	CDS:	Sobic.004G250400.2.p	(1 of 3) KOG4711 - Predicted membrane protein (PAC:37933434)
Sobic.004G254100	Org_Sbicolor	CDS:	Sobic.004G254100.1.p	(1 of 4) PTHR19241:SF219 - ABC TRANSPORTER G FAMILY MEMBER 38 (PAC:37930307)
Sobic.004G263600	Org_Sbicolor	CDS:	Sobic.004G263600.2.p	(1 of 1) K03655 - ATP-dependent DNA helicase RecG (recG) (PAC:37930498)
Sobic.004G265700	Org_Sbicolor	CDS:	Sobic.004G265700.2.p	(1 of 1) PTHR11210//PTHR11210:SF21 - RING BOX // SUBFAMILY NOT NAMED(PAC:37930385)
Sobic.004G276400	Org_Sbicolor	CDS:	Sobic.004G276400.4.p	(1 of 1) K11320 - E1A-binding protein p400 [EC:3.6.4.-] (EP400) (PAC:37931115)
Sobic.004G284900	Org_Sbicolor	CDS:	Sobic.004G284900.1.p	(1 of 1) K03019 - DNA-directed RNA polymerase III subunit RPC11 (RPC11, POLR3K) (PAC:37930159)
Sobic.004G313400	Org_Sbicolor	CDS:	Sobic.004G313400.1.p	(1 of 2) K15172 - transcription elongation factor SPT5 (SUPT5H, SPT5)(PAC:37932192)
Sobic.004G346100	Org_Sbicolor	CDS:	Sobic.004G346100.1.p	(1 of 1) PTHR14614:SF30 - S-ADENOSYL-L-METHIONINE-DEPENDENT METHYLTRANSFERASES SUPERFAMILY PROTEIN (PAC:37930046)
Sobic.006G181900	Org_Sbicolor	CDS:	Sobic.006G181900.1.p	(PAC:37945869)
Sobic.008G071400	Org_Sbicolor	CDS:	Sobic.008G071400.1.p	(1 of 1) PTHR31744:SF22 - PROTEIN CUP-SHAPED COTYLEDON 1-RELATED (PAC:37928677)
Sobic.009G199900	Org_Sbicolor	CDS:	Sobic.009G199900.1.p	(1 of 2) PTHR11362//PTHR11362:SF30 - PHOSPHATIDYLETHANOLAMINE-BINDINGPROTEIN // SUBFAMILY NOT NAMED (PAC:37922682)
Sobic.010G000100	Org_Sbicolor	CDS:	Sobic.010G000100.1.p	(1 of 130) PF02365 - No apical meristem (NAM) protein (NAM) (PAC:37909049)
Sobic.010G027700	Org_Sbicolor	CDS:	Sobic.010G027700.1.p	(1 of 35) K14488 - SAUR family protein (SAUR) (PAC:37909030)
Sobic.010G110000	Org_Sbicolor	CDS:	Sobic.010G110000.1.p	(PAC:37909956)
Sobic.010G248500	Org_Sbicolor	CDS:	Sobic.010G248500.1.p	(1 of 9) PTHR23155//PTHR23155:SF558 - LEUCINE-RICH REPEAT-CONTAININGPROTEIN // SUBFAMILY NOT NAMED (PAC:37909262)
Sobic.010G279200	Org_Sbicolor	CDS:	Sobic.010G279200.1.p	(1 of 2) PTHR10438//PTHR10438:SF299 - THIOREDOXIN // SUBFAMILY NOT NAMED (PAC:37909012)
