# Supplementary material for: Genetic Diversity and Population Structure of Sorghum [Sorghum Bicolor (L.) Moench] Accessions as Revealed by Single Nucleotide Polymorphism Markers
Source: Front Plant Sci. 2022 Jan 5;12:799482. doi: 10.3389/fpls.2021.799482 (PMC8766336; doi:10.3389/fpls.2021.799482)
Supplement: Supplementary file 9 [file Table_4.XLSX]

## Sheet: Sheet1
Supplementary Table 4 Alternative and refernce alleles (alt/ref), chromosom number (chr), possition (pos), number of allele(Na), number of effetive allele (Ne), Shannon informative index (I), observed heterozygosity (Ho), expected heterozygosity (He), unbiased expected heterozygosity (uHe), fixation indices (F), Polymorphic information content (PIC), gene diversity (H), gene flow (Nm), and minor …
SNP markers	alt/ref	chr	Pos	Na	Ne	I	Ho	He	uHe	F	Fis	Fit	Fst	Nm	H	PIC	HWE P value
snp_sb001000003033	C/G	1	1803311	1.41667	1.11474	0.131179	0.0335317	0.0775921	0.080275	0.424234	0.567846	0.837432	0.62382	0.150757	0.206609	0.185266	8.4557e-57
snp_sb001000003043	A/G	1	1803552	1.41667	1.11541	0.134258	0.0390873	0.0796292	0.0823823	0.382824	0.509133	0.802275	0.597192	0.168626	0.198012	0.178408	2.78027e-52
snp_sb001000003676	C/A	1	2253732	1.625	1.23513	0.243818	0.0587302	0.15099	0.156211	0.510092	0.611033	0.88049	0.692751	0.11088	0.491062	0.370491	1.54268e-62
snp_sb001000004256	C/T	1	2621008	1.45833	1.09436	0.12603	0.0392857	0.0705272	0.0729733	0.22728	0.442971	0.643543	0.360074	0.444301	0.110148	0.104082	1.92079e-34
snp_sb001000004455	T/A	1	2740995	1.5	1.09368	0.124307	0.0335317	0.0684349	0.0708151	0.298691	0.51002	0.908438	0.813132	0.0574533	0.364336	0.297966	2.27453e-66
snp_sb001000005811	G/C	1	3485877	1.41667	1.10702	0.118974	0.030754	0.0697217	0.0721333	0.376022	0.558904	0.812953	0.575948	0.184067	0.164667	0.15111	1.17063e-53
snp_sb001000006460	C/T	1	4115373	1.58333	1.13259	0.175985	0.0394841	0.100287	0.103765	0.435283	0.606288	0.896883	0.738091	0.0887117	0.381189	0.308536	7.05407e-65
snp_sb001000007051	G/A	1	4994136	1.5	1.13227	0.148359	0.0501984	0.0874069	0.0904283	0.257683	0.425693	0.761534	0.584777	0.177513	0.210861	0.18863	2.8178e-47
snp_sb001000007801	T/G	1	5361249	1.70833	1.14218	0.196275	0.0503968	0.108305	0.112054	0.413317	0.534677	0.889267	0.762029	0.0780714	0.455583	0.351805	8.55728e-64
snp_sb001000008148	T/A	1	5727754	1.79167	1.20626	0.233854	0.0527778	0.13747	0.142254	0.384258	0.616077	0.855111	0.622608	0.151536	0.362881	0.29704	6.55022e-59
snp_sb001000011108	C/A	1	7157302	1.625	1.11814	0.160817	0.0365079	0.0876568	0.0906936	0.406779	0.583513	0.837929	0.610863	0.159257	0.225499	0.200074	5.88359e-57
snp_sb001000012186	G/A	1	7568464	1.45833	1.11069	0.137378	0.025	0.0791667	0.0818966	0.472205	0.684211	0.935432	0.795534	0.0642543	0.387881	0.312655	2.80196e-70
snp_sb001000012544	A/G	1	7664469	1.66667	1.25234	0.254479	0.0503968	0.159216	0.164742	0.508132	0.683468	0.867751	0.582193	0.179411	0.382584	0.309399	1.77945e-60
snp_sb001000014244	G/T	1	8672693	1.66667	1.18022	0.206106	0.0529762	0.121861	0.126083	0.311902	0.565273	0.893745	0.755582	0.0808707	0.498448	0.374223	2.46307e-64
snp_sb001000014533	C/G	1	8870319	1.58333	1.19782	0.214844	0.0501984	0.131583	0.136141	0.428664	0.618504	0.898911	0.73502	0.0901268	0.496737	0.373363	4.53225e-65
snp_sb001000015314	G/A	1	9412963	1.58333	1.14245	0.182165	0.0587302	0.104879	0.10851	0.32882	0.44002	0.873776	0.774592	0.0727505	0.46572	0.357273	1.19779e-61
snp_sb001000019595	G/T	1	11587066	1.66667	1.16163	0.21093	0.053373	0.121113	0.12532	0.493687	0.559311	0.842293	0.642135	0.139326	0.338549	0.281241	1.61801e-57
snp_sb001000020660	A/C	1	12169236	1.45833	1.12407	0.149606	0.0446429	0.0873238	0.0903553	0.425381	0.488766	0.612729	0.242477	0.781027	0.115052	0.108433	3.77128e-31
snp_sb001000020836	C/G	1	12263450	1.375	1.14329	0.127069	0.133532	0.0807403	0.0835317	-0.306789	-0.653843	-0.0715425	0.352089	0.460047	0.124766	0.116983	0.174648
snp_sb001000020837	G/A	1	12263574	1.375	1.14329	0.127069	0.133532	0.0807403	0.0835317	-0.306789	-0.653843	-0.0715425	0.352089	0.460047	0.124766	0.116983	0.174648
snp_sb001000020838	T/A	1	12263619	2	1.9018	0.646417	0.894246	0.459616	0.475518	-0.878252	-0.945638	-0.808721	0.0703713	3.30259	0.494398	0.372183	5.61265e-53
snp_sb001000020839	A/C	1	12263718	1.375	1.14817	0.13165	0.122421	0.0837032	0.0865969	-0.14299	-0.462556	0.0876529	0.376197	0.414546	0.134356	0.125331	0.0962734
snp_sb001000020847	C/G	1	12265611	1.375	1.14329	0.127069	0.133532	0.0807403	0.0835317	-0.306789	-0.653843	-0.0715425	0.352089	0.460047	0.124766	0.116983	0.174648
snp_sb001000022017	A/G	1	13039268	1.66667	1.24671	0.25287	0.0670635	0.157056	0.162498	0.439482	0.572996	0.865617	0.685288	0.11481	0.499127	0.374563	1.63488e-60
snp_sb001000023505	T/A	1	13999690	1.375	1.06828	0.0993809	0.0222222	0.0542309	0.0561151	0.411629	0.59023	0.89451	0.742563	0.0866719	0.210861	0.18863	2.0983e-64
snp_sb001000027725	C/T	1	16405390	1.66667	1.20167	0.236993	0.0638889	0.141546	0.146441	0.518286	0.548634	0.831573	0.62685	0.148819	0.379827	0.307693	6.71938e-56
snp_sb001000031248	A/T	1	18160360	1.20833	1.06105	0.0714767	0.0194444	0.0428704	0.0443487	0.307438	0.546436	0.895814	0.770295	0.0745512	0.187091	0.16959	1.30975e-64
snp_sb001000034776	C/T	1	20053166	1.20833	1.0646	0.0697557	0.0222222	0.0424074	0.0438697	0.205255	0.475983	0.821429	0.659226	0.129233	0.124766	0.116983	1.29509e-54
snp_sb001000040602	C/T	1	24769165	1.45833	1.11834	0.149082	0.0369048	0.0869633	0.0899881	0.437769	0.575629	0.782193	0.486754	0.263606	0.169214	0.154898	3.68221e-50
snp_sb001000041157	T/C	1	24878133	1.5	1.11524	0.161059	0.0422619	0.0907497	0.0938994	0.546127	0.534303	0.835784	0.647376	0.136174	0.257528	0.224368	9.71782e-57
snp_sb001000041926	A/T	1	25582348	1.5	1.12638	0.16696	0.0396825	0.0963152	0.0996625	0.515492	0.587993	0.77476	0.453311	0.301498	0.175976	0.160492	3.14667e-49
snp_sb001000042345	C/T	1	25827522	1.625	1.24461	0.24336	0.0730159	0.152982	0.158283	0.373007	0.522715	0.851783	0.689457	0.112604	0.492827	0.371388	9.21335e-59
snp_sb001000044240	A/G	1	26782875	1.70833	1.19832	0.221896	0.0722222	0.131268	0.135809	0.317499	0.449811	0.853143	0.733079	0.0910274	0.49143	0.370678	1.04752e-58
snp_sb001000074336	C/A	1	53115476	1.58333	1.16211	0.192492	0.0779762	0.112962	0.116865	0.431588	0.309716	0.636843	0.473903	0.277535	0.215082	0.191952	1.40563e-33
snp_sb001000075896	T/A	1	53766186	1.66667	1.25468	0.255856	0.0724206	0.159916	0.165451	0.457219	0.547134	0.854524	0.678765	0.118316	0.497948	0.373972	5.78724e-59
snp_sb001000076933	A/T	1	54124892	1.66667	1.25133	0.251663	0.0611111	0.157407	0.162835	0.481316	0.611765	0.844773	0.600172	0.166547	0.394379	0.316612	1.21498e-57
snp_sb001000080308	A/C	1	55294223	1.58333	1.24787	0.248694	0.0672619	0.157131	0.162581	0.509048	0.571938	0.865462	0.685706	0.114588	0.499965	0.374983	1.52425e-60
snp_sb001000083608	T/G	1	56520917	1.625	1.22546	0.238402	0.0755952	0.147224	0.152332	0.436509	0.486528	0.848623	0.705189	0.104515	0.499441	0.374721	2.80639e-58
snp_sb001000084274	T/G	1	56777700	1.79167	1.29363	0.297373	0.106349	0.184649	0.191042	0.425082	0.424045	0.738349	0.545709	0.208119	0.406794	0.324053	1.22478e-44
snp_sb001000086638	G/A	1	57851364	1.5	1.14437	0.174062	0.053373	0.103342	0.106926	0.353381	0.483532	0.862981	0.734701	0.0902745	0.387881	0.312655	3.57119e-60
snp_sb001000096040	C/A	1	62433526	1.66667	1.21714	0.247283	0.072619	0.149278	0.154452	0.475148	0.513532	0.845145	0.681674	0.116744	0.46927	0.359163	8.81141e-58
snp_sb001000097158	T/C	1	62855152	1.54167	1.15699	0.185804	0.0531746	0.110297	0.114126	0.370794	0.517895	0.77249	0.52809	0.223404	0.233692	0.206386	1.22853e-48
snp_sb001000102054	C/A	1	65197507	1.41667	1.11447	0.134307	0.0305556	0.0789815	0.081705	0.416516	0.61313	0.893513	0.724746	0.0949483	0.287571	0.246223	2.7752e-64
snp_sb001000102867	C/A	1	65669536	1.16667	1.08861	0.0787816	0.0333333	0.0516667	0.0534483	0.319867	0.354839	0.799833	0.689741	0.112455	0.166945	0.153009	7.17174e-52
snp_sb001000103626	T/C	1	66111359	1.41667	1.12542	0.137154	0.0444444	0.0821939	0.0850423	0.396947	0.459273	0.680456	0.409048	0.361175	0.139105	0.12943	6.08674e-38
snp_sb001000107015	C/A	1	67845100	1.45833	1.21266	0.202059	0.0561508	0.130102	0.134608	0.415295	0.568408	0.843196	0.636684	0.142659	0.35847	0.29422	1.22406e-57
snp_sb001000110518	C/A	1	71747223	1.70833	1.20992	0.223586	0.105754	0.134074	0.138704	0.149921	0.211225	0.614307	0.511023	0.239215	0.274672	0.23695	2.41534e-31
snp_sb001000110520	T/C	1	71747313	1.625	1.17834	0.222355	0.00277778	0.130064	0.134563	0.975309	0.978643	0.991458	0.600048	0.166633	0.325638	0.272618	9.97728e-79
snp_sb001000111049	A/G	1	71997938	1.5	1.16668	0.1831	0.0672619	0.11139	0.115263	0.305989	0.39616	0.863588	0.774092	0.072959	0.492827	0.371388	2.78818e-60
snp_sb001000111230	A/T	1	72170358	1.375	1.09895	0.119036	0.0416667	0.0695087	0.0719197	0.394084	0.400555	0.860148	0.766697	0.0760739	0.298326	0.253827	1.09611e-59
snp_sb001000112112	C/T	1	72766543	1.54167	1.06607	0.113094	0.0444444	0.0568235	0.0587971	0.160678	0.217851	0.817461	0.766618	0.0761076	0.24376	0.21405	4.51667e-54
snp_sb001000117799	C/T	1	75970265	1.70833	1.13146	0.173188	0.0472222	0.0952778	0.0985632	0.268596	0.504373	0.905432	0.809196	0.0589488	0.499441	0.374721	6.19539e-66
snp_sb001000118310	T/A	1	76370704	1.625	1.22632	0.235744	0.0611111	0.145204	0.150237	0.370907	0.579136	0.851383	0.646876	0.136473	0.411542	0.326859	1.67742e-58
snp_sb001000118552	T/G	1	76688108	1.08333	1.05732	0.0475619	0.00277778	0.0323148	0.0334291	0.88	0.91404	0.972891	0.684627	0.115163	0.102734	0.0974571	7.06722e-76
snp_sb001000122073	C/T	1	78930156	1.45833	1.19647	0.192152	0.0666667	0.121623	0.125853	0.472507	0.451859	0.772556	0.585063	0.177305	0.292983	0.250064	1.97625e-48
snp_sb001000125278	C/G	1	80446857	1.70833	1.20351	0.216223	0.075	0.129324	0.133797	0.30331	0.420059	0.847415	0.736896	0.0892611	0.491791	0.370862	5.74308e-58
snp_sb001000144922	G/T	2	9783291	1.58333	1.10149	0.149974	0.0416667	0.0808333	0.0836207	0.391119	0.484536	0.869108	0.74607	0.0850891	0.318996	0.268117	6.48816e-61
snp_sb001000144926	T/A	2	9790467	1.54167	1.08527	0.135436	0.0335317	0.0712127	0.0736887	0.43814	0.529132	0.891913	0.770451	0.0744855	0.311179	0.262763	6.02481e-64
snp_sb001000351814	C/A	4	452829	1.70833	1.31066	0.295692	0.102976	0.188527	0.195049	0.43562	0.453787	0.783687	0.603978	0.163923	0.476397	0.36292	7.14378e-50
snp_sb001000351819	C/T	4	453410	1.83333	1.3225	0.312814	0.127778	0.196453	0.203242	0.318148	0.349576	0.724943	0.577111	0.183192	0.464987	0.356881	7.08431e-43
snp_sb001000351824	T/C	4	453698	1.66667	1.30607	0.279897	0.11131	0.18074	0.18698	0.340033	0.384147	0.760366	0.610891	0.159239	0.464987	0.356881	4.6672e-47
snp_sb001000351825	G/A	4	453774	1.75	1.31042	0.297477	0.119444	0.188398	0.194908	0.351637	0.365998	0.744085	0.596349	0.169217	0.467164	0.358043	4.41586e-45
snp_sb001000352151	A/C	4	725358	1.41667	1.13172	0.139464	0.0640873	0.0852773	0.0882252	0.173991	0.248484	0.6569	0.543456	0.210018	0.188016	0.170341	2.03394e-35
snp_sb001000352477	C/T	4	849179	1.625	1.26787	0.257468	0.0863095	0.163611	0.16926	0.461926	0.47247	0.815618	0.650481	0.134331	0.468576	0.358794	6.91507e-54
snp_sb001000352639	A/G	4	949352	1.54167	1.10135	0.150252	0.0363095	0.081944	0.084777	0.429739	0.556898	0.858761	0.68125	0.116973	0.257528	0.224368	1.30175e-59
snp_sb001000354412	C/T	4	1669767	1.54167	1.24758	0.233073	0.00277778	0.149352	0.154502	0.920424	0.981401	0.993333	0.641526	0.139696	0.417304	0.330232	5.09879e-79
snp_sb001000355231	C/G	4	2276881	1.66667	1.24917	0.250566	0.0751984	0.156759	0.162172	0.337425	0.520292	0.830423	0.6465	0.136698	0.442257	0.344461	1.01673e-55
snp_sb001000355255	T/G	4	2284107	1.54167	1.14599	0.168182	0.055754	0.099444	0.10288	0.313711	0.439343	0.58449	0.258888	0.715669	0.134356	0.125331	1.38905e-28
snp_sb001000355478	C/T	4	2371171	2	1.96341	0.681696	0.941667	0.488981	0.505896	-0.914036	-0.925772	-0.883464	0.0219691	11.1296	0.499965	0.374983	7.52045e-63
snp_sb001000355704	A/G	4	2487778	1.45833	1.12592	0.149687	0.0555556	0.0879346	0.090981	0.385178	0.368217	0.751091	0.606022	0.162527	0.223431	0.19847	6.59887e-46
snp_sb001000361548	A/G	4	5929299	1.625	1.21221	0.230734	0.0668651	0.141398	0.146294	0.466794	0.527114	0.864444	0.713342	0.100463	0.493478	0.371718	2.63684e-60
snp_sb001000362091	C/T	4	6158866	1.125	1.04843	0.0483086	0.0194444	0.0300642	0.0311151	0.665072	0.353237	0.834564	0.744209	0.0859269	0.117492	0.11059	2.97298e-56
snp_sb001000362667	G/T	4	6420995	1.75	1.30544	0.306848	0.0918651	0.192787	0.199455	0.474609	0.523489	0.804371	0.589455	0.17412	0.469957	0.359527	1.88187e-52
snp_sb001000365243	G/A	4	7776067	1.5	1.17673	0.184301	0.0668651	0.113148	0.117057	0.402703	0.409046	0.733855	0.549635	0.204847	0.251674	0.220004	5.18576e-44
snp_sb001000365901	T/A	4	7962004	1.79167	1.27258	0.286884	0.0674908	0.175971	0.182082	0.393803	0.616466	0.865003	0.648017	0.135792	0.499902	0.374951	4.10591e-60
snp_sb001000365903	G/C	4	7962077	1.79167	1.23169	0.264838	0.0755952	0.157602	0.163056	0.309046	0.52034	0.848397	0.683936	0.115531	0.498743	0.374371	2.99346e-58
snp_sb001000367099	A/T	4	8350354	1.20833	1.10056	0.0887619	0.0529762	0.0582403	0.0602559	0.0890294	0.0903855	0.598063	0.558124	0.197929	0.131971	0.123262	7.52124e-30
snp_sb001000370493	G/A	4	9913904	1.29167	1.07026	0.0873623	0.0335317	0.0505551	0.0523057	0.240629	0.336728	0.680998	0.519048	0.231651	0.105213	0.0996784	3.13844e-38
snp_sb001000371147	C/A	4	10278156	1.29167	1.15643	0.12805	0.0472222	0.0858333	0.0887931	0.275523	0.449838	0.746977	0.540093	0.212883	0.187091	0.16959	1.82463e-45
snp_sb001000371201	G/A	4	10303246	1.45833	1.13616	0.151893	0.055754	0.0907403	0.0938766	0.310157	0.385565	0.682675	0.48355	0.26701	0.175976	0.160492	2.38068e-38
snp_sb001000379982	C/A	4	13782526	1.20833	1.06082	0.0735113	0.0196429	0.0436106	0.0451218	0.493642	0.549586	0.89725	0.771876	0.0738863	0.191483	0.17315	6.05007e-65
snp_sb001000435348	T/A	4	40069234	1.29167	1.06626	0.085463	0.030754	0.0484255	0.0501026	0.27134	0.364921	0.822702	0.720825	0.0968249	0.17373	0.158639	6.67098e-55
snp_sb001000452883	G/A	4	46616273	1.75	1.35585	0.325316	0.305952	0.209972	0.217226	-0.247913	-0.457113	-0.11529	0.234589	0.815694	0.274672	0.23695	0.028589
snp_sb001000453716	C/T	4	46965033	1.29167	1.06964	0.0882793	0.0279762	0.0505551	0.0523057	0.32425	0.44662	0.836598	0.704719	0.104751	0.171476	0.156774	1.03171e-56
snp_sb001000454785	T/C	4	47422903	1.66667	1.25058	0.26385	0.078373	0.16399	0.169666	0.45516	0.522088	0.839942	0.665089	0.12589	0.489909	0.369904	3.87045e-57
snp_sb001000462203	T/C	4	50906055	1.54167	1.13458	0.16657	0.0472222	0.0963605	0.0996974	0.384182	0.509942	0.797706	0.587205	0.175746	0.233692	0.206386	1.43538e-51
snp_sb001000462725	C/T	4	51311544	1.625	1.23379	0.247692	0.0535714	0.153416	0.158747	0.452416	0.65081	0.874131	0.639539	0.140906	0.424624	0.334471	1.44875e-61
snp_sb001000463966	G/A	4	51713916	1.66667	1.17326	0.197568	0.0501984	0.116111	0.120122	0.290478	0.567667	0.899493	0.767523	0.0757229	0.499531	0.374765	3.77486e-65
snp_sb001000465226	T/C	4	52145636	1.625	1.18589	0.204877	0.0501984	0.12325	0.12752	0.369008	0.59271	0.860961	0.658625	0.129579	0.361419	0.296107	7.26016e-60
snp_sb001000467136	T/A	4	52937137	1.54167	1.13819	0.165893	0.0559524	0.096268	0.0996017	0.292788	0.418785	0.749313	0.568685	0.18961	0.223431	0.19847	6.59887e-46
snp_sb001000467166	A/G	4	52955257	1.20833	1.11736	0.102467	0.0166667	0.0683333	0.0706897	0.582481	0.756098	0.933624	0.727859	0.0934729	0.251674	0.220004	5.09276e-70
snp_sb001000467856	C/T	4	53279046	1.58333	1.14461	0.174022	0.0615079	0.100898	0.104391	0.216252	0.390392	0.772679	0.627103	0.148659	0.270917	0.234219	1.13872e-48
snp_sb001000469722	C/T	4	54108806	1.54167	1.12003	0.155346	0.0446429	0.0881477	0.0911946	0.35618	0.493545	0.879175	0.76143	0.0783294	0.370078	0.301599	2.33589e-62
snp_sb001000472651	T/G	4	55527424	1.75	1.26616	0.268264	0.0835317	0.166296	0.172037	0.311678	0.497692	0.832852	0.667241	0.124677	0.499686	0.374843	4.36596e-56
snp_sb001000473539	G/A	4	55879308	1.58333	1.28845	0.275169	0.080754	0.178157	0.184321	0.505515	0.546726	0.81934	0.601433	0.165674	0.445981	0.346532	2.72936e-54
snp_sb001000474335	G/T	4	56315233	1.5	1.15387	0.165708	0.0390873	0.0998143	0.103264	0.40777	0.6084	0.883805	0.703282	0.105476	0.336962	0.28019	5.25084e-63
snp_sb001000482466	A/G	4	61971966	1.45833	1.19257	0.184422	0.0613095	0.117592	0.121654	0.376251	0.478626	0.854053	0.720072	0.0971877	0.420667	0.332187	6.21725e-59
snp_sb001000482471	A/C	4	61983014	1.375	1.21654	0.191274	0.0559524	0.127241	0.131655	0.510383	0.560265	0.861277	0.684531	0.115214	0.401921	0.321151	6.99684e-60
snp_sb001000482472	A/G	4	61983254	1.45833	1.19257	0.184422	0.0613095	0.117592	0.121654	0.376251	0.478626	0.854053	0.720072	0.0971877	0.420667	0.332187	6.21725e-59
snp_sb001000482473	C/T	4	61984982	1.45833	1.19257	0.184422	0.0613095	0.117592	0.121654	0.376251	0.478626	0.854053	0.720072	0.0971877	0.420667	0.332187	6.21725e-59
snp_sb001000482474	T/C	4	61985119	1.45833	1.19257	0.184422	0.0613095	0.117592	0.121654	0.376251	0.478626	0.854053	0.720072	0.0971877	0.420667	0.332187	6.21725e-59
snp_sb001000482477	T/C	4	61988638	1.45833	1.19257	0.184422	0.0613095	0.117592	0.121654	0.376251	0.478626	0.854053	0.720072	0.0971877	0.420667	0.332187	6.21725e-59
snp_sb001000482478	T/C	4	61989325	1.375	1.21654	0.191274	0.0559524	0.127241	0.131655	0.510383	0.560265	0.861277	0.684531	0.115214	0.401921	0.321151	6.99684e-60
snp_sb001000591921	C/T	6	1920403	1.25	1.08118	0.0861993	0.025	0.0530556	0.0548851	0.287479	0.528796	0.927353	0.845828	0.0455684	0.344818	0.285368	4.20004e-69
snp_sb001000592119	T/C	6	1961574	1.625	1.19321	0.227782	0.0613095	0.13602	0.140742	0.447799	0.549261	0.867208	0.70539	0.104414	0.461977	0.355265	1.09337e-60
snp_sb001000593558	G/T	6	2456022	1.58333	1.18349	0.209105	0.0698413	0.126037	0.13041	0.405916	0.445869	0.736617	0.524692	0.22647	0.265225	0.230053	2.29527e-44
snp_sb001000594732	C/T	6	2726668	1.625	1.24294	0.240701	0.158532	0.151388	0.156616	0.0406953	-0.0471854	0.575786	0.594901	0.170238	0.374303	0.304251	1.03147e-27
snp_sb001000595947	A/C	6	2921565	1.66667	1.25833	0.272552	0.0835317	0.169659	0.17558	0.474012	0.50765	0.813126	0.620444	0.152938	0.448728	0.34805	5.23593e-53
snp_sb001000596354	G/C	6	3007657	1.58333	1.19877	0.209507	0.05	0.128305	0.132743	0.537276	0.610304	0.876933	0.684198	0.115391	0.406794	0.324053	5.71052e-62
snp_sb001000597017	G/C	6	3257628	1.58333	1.25694	0.246969	0.0555556	0.158519	0.163985	0.45257	0.649533	0.878341	0.652867	0.132926	0.457228	0.352699	3.65536e-62
snp_sb001000597483	C/G	6	3382035	1.5	1.19597	0.204635	0.0753968	0.127519	0.131942	0.384444	0.40874	0.765948	0.604146	0.163807	0.322332	0.270383	8.24722e-48
snp_sb001000599480	A/G	6	3877931	1.54167	1.21805	0.220633	0.0642857	0.139123	0.143956	0.43696	0.537922	0.871356	0.721596	0.0964544	0.499752	0.374876	2.70919e-61
snp_sb001000600065	G/A	6	4119597	1.58333	1.1709	0.202503	0.0642857	0.120049	0.124225	0.328321	0.464505	0.837461	0.69647	0.108953	0.395656	0.317384	8.82413e-57
snp_sb001000600067	G/T	6	4119745	1.66667	1.22388	0.252227	0.0865079	0.153012	0.158324	0.386912	0.434633	0.808962	0.662099	0.127587	0.453057	0.350427	4.3935e-53
snp_sb001000600121	G/C	6	4129262	1.5	1.19036	0.178056	0.0615079	0.11292	0.116849	0.208095	0.455294	0.75199	0.544691	0.208976	0.247732	0.217047	3.86676e-46
snp_sb001000600993	T/A	6	4719375	1.125	1.035	0.0433009	0.00833333	0.0256481	0.0265326	0.516284	0.67509	0.970585	0.909466	0.0248866	0.283925	0.243618	1.59051e-75
snp_sb001000603506	T/G	6	5571971	1.58333	1.21333	0.219099	0.0472222	0.13599	0.140694	0.455491	0.652753	0.895204	0.69821	0.108058	0.449581	0.34852	1.87274e-64
snp_sb001000604124	C/T	6	6028231	1.54167	1.18321	0.191504	0.075	0.117685	0.121743	0.326047	0.362707	0.812498	0.705784	0.104216	0.400684	0.32041	1.88512e-53
snp_sb001000604215	C/T	6	6057084	1.45833	1.18502	0.182376	0.0833333	0.115	0.118966	0.26028	0.275362	0.813272	0.742315	0.0867844	0.446893	0.347036	1.53139e-53
snp_sb001000604537	A/G	6	6142367	1.58333	1.12666	0.163559	0.0670635	0.0927967	0.0960226	0.181421	0.277307	0.75577	0.662056	0.127612	0.274672	0.23695	1.30889e-46
snp_sb001000605264	T/C	6	6460648	1.41667	1.09118	0.116258	0.025	0.0660185	0.068295	0.367374	0.621318	0.918869	0.785755	0.0681655	0.3088	0.261122	7.04078e-68
snp_sb001000605389	G/A	6	6509935	1.45833	1.11537	0.146706	0.0503968	0.0853269	0.0883051	0.239306	0.409368	0.862732	0.767592	0.075694	0.367222	0.299796	3.67328e-60
snp_sb001000605411	G/C	6	6511835	1.54167	1.10971	0.153061	0.047619	0.0854819	0.0884556	0.268823	0.442934	0.78082	0.606546	0.16217	0.217181	0.193597	1.15355e-49
snp_sb001000605532	C/T	6	6588554	1.70833	1.1884	0.218768	0.0694444	0.128768	0.133222	0.320966	0.460701	0.833384	0.691051	0.111768	0.417304	0.330232	3.91848e-56
snp_sb001000605574	G/A	6	6592681	1.70833	1.1884	0.218768	0.0694444	0.128768	0.133222	0.320966	0.460701	0.833384	0.691051	0.111768	0.417304	0.330232	3.91848e-56
snp_sb001000607432	A/G	6	7170773	1.45833	1.11765	0.145913	0.0529762	0.0848238	0.0877691	0.422111	0.375456	0.459592	0.134716	1.60575	0.097753	0.0929751	3.65738e-18
snp_sb001000607954	C/T	6	7368472	1.54167	1.14371	0.175942	0.0642857	0.103074	0.106655	0.347994	0.376318	0.770533	0.632077	0.145521	0.280247	0.240978	2.22786e-48
snp_sb001000607955	G/A	6	7368847	1.5	1.10329	0.144932	0.0420635	0.0808522	0.0836663	0.380305	0.479749	0.860578	0.732011	0.0915249	0.301848	0.256292	6.60212e-60
snp_sb001000613717	T/A	6	9693376	1.5	1.09991	0.142115	0.0392857	0.0787226	0.0814632	0.397518	0.50096	0.871997	0.743502	0.0862465	0.307074	0.259927	1.8572e-61
snp_sb001000652380	G/A	6	26387044	1.20833	1.04987	0.067791	0.0166667	0.0387037	0.0400383	0.415433	0.569378	0.824561	0.592593	0.171875	0.0952507	0.0907143	5.09827e-55
snp_sb001000657491	G/C	6	28163676	1.20833	1.04987	0.067791	0.0166667	0.0387037	0.0400383	0.415433	0.569378	0.824561	0.592593	0.171875	0.0952507	0.0907143	5.09827e-55
snp_sb001000661277	T/C	6	29539011	1.41667	1.0945	0.128637	0.0392857	0.0729819	0.0755245	0.376196	0.461706	0.869024	0.756684	0.0803889	0.300091	0.255064	4.69766e-61
snp_sb001000663493	G/A	6	30297630	1.20833	1.04987	0.067791	0.0166667	0.0387037	0.0400383	0.415433	0.569378	0.824561	0.592593	0.171875	0.0952507	0.0907143	5.09827e-55
snp_sb001000664982	T/A	6	30771394	1.41667	1.0945	0.128637	0.0392857	0.0729819	0.0755245	0.376196	0.461706	0.869024	0.756684	0.0803889	0.300091	0.255064	4.69766e-61
snp_sb001000665443	G/A	6	30979222	1.20833	1.03656	0.0556304	0.0222222	0.03	0.0310345	0.20729	0.259259	0.915414	0.885808	0.0322281	0.263313	0.228646	2.19766e-67
snp_sb001000665444	C/G	6	30979346	1.29167	1.06161	0.0883533	0.0277778	0.0492593	0.0509579	0.351361	0.43609	0.9	0.822667	0.0538898	0.278396	0.239644	3.40621e-65
snp_sb001000681326	A/G	6	37907084	1.5	1.12612	0.163454	0.0222222	0.0946296	0.0978927	0.624929	0.765166	0.921048	0.663797	0.126621	0.28209	0.242302	3.41092e-68
snp_sb001000681640	A/G	6	38029471	1.33333	1.1014	0.106788	0.0611111	0.0644444	0.0666667	0.242162	0.0517241	0.388795	0.355456	0.453322	0.100248	0.0952227	1.77402e-13
snp_sb001000682282	A/G	6	38353641	1.70833	1.22839	0.243705	0.0555556	0.147749	0.152858	0.580269	0.623988	0.888012	0.702169	0.10604	0.496272	0.373129	1.73231e-63
snp_sb001000683320	G/A	6	38730782	1.5	1.16987	0.185277	0.0753968	0.11326	0.117191	0.367222	0.334301	0.715666	0.572879	0.186392	0.265225	0.230053	5.67421e-42
snp_sb001000684448	G/A	6	39213106	1.29167	1.14211	0.137166	0.0416667	0.0887963	0.0918582	0.544405	0.530761	0.832753	0.643577	0.138454	0.249707	0.21853	4.48676e-56
snp_sb001000684481	C/A	6	39331853	1.41667	1.15792	0.157744	0.0722222	0.0990741	0.10249	0.273997	0.271028	0.732816	0.633478	0.144647	0.270917	0.234219	8.1251e-44
snp_sb001000684513	G/A	6	39334139	1.41667	1.15792	0.157744	0.0722222	0.0990741	0.10249	0.273997	0.271028	0.732816	0.633478	0.144647	0.270917	0.234219	8.1251e-44
snp_sb001000684514	T/G	6	39334255	1.41667	1.15792	0.157744	0.0722222	0.0990741	0.10249	0.273997	0.271028	0.732816	0.633478	0.144647	0.270917	0.234219	8.1251e-44
snp_sb001000684532	G/A	6	39338450	1.41667	1.15792	0.157744	0.0722222	0.0990741	0.10249	0.273997	0.271028	0.732816	0.633478	0.144647	0.270917	0.234219	8.1251e-44
snp_sb001000685308	G/C	6	39650537	1.66667	1.27813	0.281799	0.0948413	0.177426	0.183571	0.461528	0.465461	0.803779	0.632916	0.144997	0.483609	0.36667	2.01646e-52
snp_sb001000685521	C/T	6	39744274	1.5	1.14895	0.164871	0.0809524	0.0991856	0.102632	0.217741	0.183829	0.546258	0.444061	0.312986	0.178215	0.162335	3.80929e-25
snp_sb001000686289	G/A	6	39926582	1.20833	1.06892	0.0742435	0.0388889	0.045	0.0465517	0.325867	0.135802	0.674881	0.62379	0.150776	0.119925	0.112734	1.96342e-37
snp_sb001000686451	A/T	6	40020920	1.58333	1.24208	0.237847	0.0333333	0.149815	0.154981	0.620409	0.777503	0.933331	0.700361	0.106959	0.499965	0.374983	5.92312e-70
snp_sb001000687033	C/T	6	40233322	1.625	1.22886	0.251171	0.10873	0.154556	0.159912	0.30823	0.2965	0.739229	0.629323	0.147252	0.417304	0.330232	1.26526e-44
snp_sb001000687053	C/T	6	40243159	1.16667	1.09744	0.0870817	0.0611111	0.0577778	0.0597701	0.129704	-0.0576923	0.720635	0.735873	0.0897325	0.219272	0.195232	1.96479e-42
snp_sb001000687855	A/C	6	40438821	1.375	1.07733	0.10966	0.0361111	0.0610185	0.0631226	0.316062	0.408194	0.874151	0.787348	0.0675216	0.287571	0.246223	1.32462e-61
snp_sb001000688009	A/G	6	40518645	1.29167	1.1544	0.135486	0.0416667	0.0899074	0.0930077	0.387224	0.53656	0.753148	0.467349	0.284932	0.169214	0.154898	3.4247e-46
snp_sb001000688895	C/A	6	41876397	1.5	1.12131	0.149922	0.0452381	0.0869529	0.089979	0.251691	0.479741	0.766592	0.551363	0.203422	0.194142	0.175296	4.67784e-48
snp_sb001000689113	C/T	6	41901838	1.33333	1.10124	0.118147	0.0277778	0.0705556	0.0729885	0.436136	0.606299	0.856219	0.634795	0.143828	0.193667	0.174914	3.51933e-59
snp_sb001000689515	C/G	6	42048165	1.33333	1.12112	0.129409	0.0404762	0.080069	0.0829779	0.444022	0.494483	0.80067	0.60569	0.162752	0.195098	0.176067	2.76157e-51
snp_sb001000690197	G/A	6	42349416	1.625	1.23798	0.24603	0.0444444	0.153305	0.158605	0.53144	0.710091	0.909893	0.689188	0.112746	0.493478	0.371718	1.42368e-66
snp_sb001000690343	G/C	6	42427745	1.66667	1.20832	0.231534	0.0865079	0.139926	0.144777	0.30963	0.381761	0.691211	0.500535	0.249466	0.280247	0.240978	2.91787e-39
snp_sb001000690607	A/T	6	42544094	1.41667	1.12407	0.13874	0.0585317	0.0834255	0.0863095	0.27017	0.298395	0.633836	0.478105	0.272897	0.16009	0.147275	2.65595e-33
snp_sb001000690991	A/G	6	42692323	1.66667	1.19645	0.223365	0.0587302	0.133753	0.138401	0.343891	0.560905	0.866562	0.696107	0.10914	0.440348	0.343395	1.16012e-60
snp_sb001000691116	T/C	6	42724389	1.25	1.07655	0.0841609	0.0444444	0.0507407	0.0524904	0.239244	0.124088	0.817247	0.791357	0.0659129	0.24376	0.21405	4.51667e-54
snp_sb001000691301	A/G	6	42753613	1.70833	1.1977	0.229093	0.0503968	0.13576	0.140467	0.425743	0.628779	0.895732	0.719122	0.0976463	0.483609	0.36667	1.09936e-64
snp_sb001000691446	C/T	6	42804037	1.20833	1.07063	0.0739555	0.0444444	0.0455556	0.0471264	0.087093	0.0243902	0.576471	0.565882	0.191788	0.105213	0.0996784	9.12381e-28
snp_sb001000691448	C/T	6	42805948	1.5	1.12567	0.15726	0.0390873	0.0907403	0.0938766	0.433663	0.56924	0.864693	0.685888	0.114491	0.289383	0.247512	2.11216e-60
snp_sb001000691485	C/G	6	42835020	1.45833	1.06616	0.107854	0.0444444	0.0559259	0.0578544	0.159133	0.205298	0.842097	0.801305	0.0619911	0.28209	0.242302	2.68283e-57
snp_sb001000691587	G/C	6	42916365	1.25	1.04248	0.0658358	0.0277778	0.0351852	0.0363985	0.160837	0.210526	0.895779	0.867987	0.0380228	0.26713	0.231451	1.33354e-64
snp_sb001000692146	T/C	6	43189859	1.25	1.04248	0.0658358	0.0277778	0.0351852	0.0363985	0.160837	0.210526	0.895779	0.867987	0.0380228	0.26713	0.231451	1.33354e-64
snp_sb001000694198	G/C	6	43504389	1.25	1.09756	0.0927899	0.0138889	0.0582407	0.060249	0.734994	0.761526	0.857544	0.402635	0.370909	0.097753	0.0929751	2.31766e-59
snp_sb001000694460	A/G	6	43635960	1.125	1.02482	0.0350682	0.00555556	0.0194444	0.0201149	0.575172	0.714286	0.944436	0.805526	0.0603564	0.100248	0.0952227	1.3053e-71
snp_sb001000694969	T/C	6	43991145	1.33333	1.08572	0.0989023	0.0416667	0.0578704	0.0598659	0.38071	0.28	0.795729	0.716291	0.0990204	0.204472	0.183567	2.34692e-51
snp_sb001000696623	C/T	6	44852919	1.375	1.10155	0.121911	0.0390873	0.0713979	0.0738802	0.531759	0.452542	0.629389	0.323032	0.523916	0.105213	0.0996784	8.82122e-33
snp_sb001000696689	C/G	6	44886514	1.41667	1.10747	0.132116	0.0446429	0.076583	0.0792442	0.471441	0.417066	0.595578	0.30623	0.566381	0.110148	0.104082	1.63215e-29
snp_sb001000696706	A/T	6	44897579	1.41667	1.10747	0.132116	0.0446429	0.076583	0.0792442	0.471441	0.417066	0.595578	0.30623	0.566381	0.110148	0.104082	1.63215e-29
snp_sb001000696837	C/G	6	44959317	1.41667	1.05346	0.0922694	0.0388889	0.0464815	0.0480843	0.149699	0.163347	0.840091	0.808871	0.0590727	0.24376	0.21405	4.9025e-57
snp_sb001000696927	G/C	6	44994061	1.41667	1.05989	0.0992017	0.0388889	0.0511111	0.0528736	0.248874	0.23913	0.842657	0.793207	0.0651763	0.247732	0.217047	2.25212e-57
snp_sb001000697046	C/T	6	45028184	1.33333	1.0584	0.0877261	0.0251984	0.0471292	0.0487616	0.456668	0.465333	0.742016	0.517486	0.233105	0.097753	0.0929751	4.49563e-45
snp_sb001000697108	C/G	6	45047830	1.58333	1.13148	0.181554	0.0448413	0.102056	0.105601	0.494511	0.560621	0.907602	0.789708	0.0665727	0.485564	0.367678	2.30528e-66
snp_sb001000697150	G/T	6	45080634	1.41667	1.13808	0.155956	0.0640873	0.0942682	0.0975392	0.419378	0.32016	0.715681	0.581786	0.179711	0.225499	0.200074	6.53374e-42
snp_sb001000697245	T/C	6	45141773	1.5	1.10613	0.141639	0.0501984	0.0792588	0.0819992	0.397077	0.366652	0.841531	0.749792	0.0834259	0.317316	0.266971	2.69703e-57
snp_sb001000697293	T/C	6	45160764	1.54167	1.16231	0.177421	0.0501984	0.106296	0.109969	0.49821	0.527748	0.871682	0.728285	0.0932721	0.391803	0.315048	2.52284e-61
snp_sb001000697427	C/G	6	45286367	1.625	1.16514	0.210692	0.0448413	0.122426	0.126674	0.565227	0.633728	0.905934	0.743179	0.0863926	0.476998	0.363235	3.95094e-66
snp_sb001000697558	G/C	6	45347198	1.29167	1.07581	0.0923573	0.0444444	0.0537037	0.0555556	0.26235	0.172414	0.804228	0.763442	0.0774642	0.227559	0.201667	2.02751e-52
snp_sb001000697800	C/T	6	45484410	1.66667	1.30392	0.294169	0.0974206	0.187964	0.194477	0.471924	0.481707	0.795727	0.605873	0.162628	0.476397	0.36292	2.5591e-51
snp_sb001000697803	T/A	6	45484918	1.66667	1.30075	0.2931	0.100198	0.186946	0.193423	0.460912	0.464024	0.789637	0.607514	0.161513	0.475788	0.362601	1.46883e-50
snp_sb001000697844	G/T	6	45588899	1.66667	1.29069	0.279048	0.0670635	0.177797	0.183954	0.519678	0.622808	0.865185	0.642583	0.139055	0.497575	0.373785	1.86245e-60
snp_sb001000697985	C/T	6	45686419	1.5	1.12634	0.161163	0.055754	0.0928793	0.0961024	0.398963	0.399716	0.735522	0.559412	0.196898	0.210861	0.18863	3.5516e-44
snp_sb001000698305	A/C	6	45779191	1.33333	1.0825	0.0966701	0.0251984	0.0562958	0.0583805	0.278485	0.552393	0.875249	0.721293	0.0965996	0.203637	0.182903	1.73255e-60
snp_sb001000698784	G/A	6	45990128	1.625	1.22249	0.232102	0.0474206	0.14315	0.148117	0.502005	0.668734	0.904938	0.713034	0.100615	0.498743	0.374371	6.46943e-66
snp_sb001000698835	C/T	6	46004555	1.41667	1.15561	0.1669	0.0363095	0.102779	0.106355	0.677785	0.646723	0.916615	0.763966	0.0772396	0.434436	0.340068	1.44231e-67
snp_sb001000699110	C/T	6	46078494	1.29167	1.1152	0.1211	0.0390873	0.0754719	0.0780948	0.407772	0.482095	0.793513	0.601303	0.165764	0.189291	0.171375	3.79014e-51
snp_sb001000699258	C/T	6	46123636	1.58333	1.14947	0.190954	0.0335317	0.109731	0.113535	0.698422	0.694419	0.866681	0.56372	0.193483	0.251674	0.220004	1.15125e-60
snp_sb001000699642	G/T	6	46593261	1.29167	1.10269	0.109241	0.0444444	0.067037	0.0693487	0.278772	0.337017	0.576471	0.361176	0.442182	0.105213	0.0996784	9.12381e-28
snp_sb001000699886	G/C	6	46698888	1.58333	1.20901	0.224646	0.0724206	0.137962	0.142727	0.431221	0.47507	0.81727	0.651896	0.133497	0.396924	0.31815	4.04386e-54
snp_sb001000699926	G/A	6	46724767	1.58333	1.13399	0.165372	0.0948413	0.0940457	0.0973028	0.0049132	-0.00845908	0.36119	0.366548	0.432038	0.148509	0.137482	6.68708e-12
snp_sb001000701074	A/G	6	47227969	1.375	1.21979	0.190542	0.0305556	0.126944	0.131322	0.757297	0.7593	0.90782	0.617035	0.155164	0.332155	0.276992	2.68089e-66
snp_sb001000701166	T/G	6	47267462	1.58333	1.25821	0.251324	0.030754	0.160009	0.165547	0.777075	0.807798	0.926227	0.61617	0.155732	0.417304	0.330232	5.34378e-69
snp_sb001000701292	C/T	6	47306837	1.41667	1.21886	0.199549	0.0333333	0.130926	0.135441	0.683538	0.745403	0.9018	0.614294	0.156972	0.340128	0.282284	1.91147e-65
snp_sb001000701343	G/C	6	47320052	1.29167	1.16862	0.141713	0.0251984	0.0952773	0.0985701	0.50645	0.735526	0.861833	0.477579	0.273473	0.182669	0.165985	4.5733e-60
snp_sb001000701612	C/G	6	47442335	1.20833	1.0681	0.0745892	0.0305556	0.045463	0.0470307	0.319328	0.327902	0.686597	0.533695	0.218433	0.097753	0.0929751	1.09806e-38
snp_sb001000702141	C/A	6	47599757	1.79167	1.26037	0.283386	0.080754	0.172964	0.17896	0.422947	0.533118	0.780839	0.530586	0.221177	0.368654	0.300701	1.56524e-49
snp_sb001000702204	G/T	6	47614312	1.625	1.23225	0.242557	0.0555556	0.150342	0.15554	0.517145	0.630472	0.882514	0.682065	0.116534	0.473274	0.36128	9.86246e-63
snp_sb001000702333	A/C	6	47643257	1.375	1.11239	0.124178	0.0613095	0.0740736	0.0766352	0.220394	0.172316	0.714465	0.655019	0.131668	0.215082	0.191952	8.05141e-42
snp_sb001000702417	A/T	6	47661888	1.54167	1.13398	0.167872	0.0418651	0.0962032	0.0995279	0.540401	0.564827	0.857727	0.673066	0.121434	0.294772	0.251327	1.84869e-59
snp_sb001000702528	G/T	6	47700133	1.20833	1.06469	0.0732997	0.0277778	0.0442593	0.0457854	0.337005	0.372385	0.707602	0.534113	0.218066	0.0952507	0.0907143	5.55129e-41
snp_sb001000702655	A/G	6	47747134	1.70833	1.18082	0.233194	0.0696429	0.134816	0.139496	0.474752	0.483424	0.829197	0.669355	0.123494	0.407993	0.324764	1.22642e-55
snp_sb001000702744	G/A	6	47777852	1.66667	1.27075	0.271721	0.0668651	0.17102	0.176948	0.560063	0.609022	0.862751	0.64896	0.135232	0.487395	0.368618	4.46282e-60
snp_sb001000702898	T/C	6	47851284	1.29167	1.09017	0.0967101	0.0224206	0.0587032	0.0607348	0.41235	0.618068	0.861719	0.637944	0.141884	0.162382	0.149198	4.56088e-60
snp_sb001000703068	C/T	6	47897247	1.58333	1.20869	0.225854	0.0779762	0.138798	0.143615	0.468072	0.438203	0.828736	0.695149	0.109635	0.455583	0.351805	1.42951e-55
snp_sb001000703070	A/G	6	47897367	1.375	1.10832	0.12305	0.0501984	0.0729625	0.0754858	0.278128	0.311997	0.75148	0.638781	0.14137	0.202326	0.181858	4.36319e-46
snp_sb001000703205	C/T	6	47920200	1.33333	1.15323	0.151101	0.0444444	0.0964815	0.0998084	0.604252	0.539347	0.804228	0.575012	0.184774	0.227559	0.201667	2.02751e-52
snp_sb001000703358	G/A	6	47999962	1.5	1.12595	0.156332	0.0390873	0.0903699	0.0934934	0.466256	0.567474	0.895013	0.757271	0.080133	0.372902	0.303374	1.47002e-64
snp_sb001000703373	C/T	6	48007508	1.5	1.12595	0.156332	0.0390873	0.0903699	0.0934934	0.466256	0.567474	0.895013	0.757271	0.080133	0.372902	0.303374	1.47002e-64
snp_sb001000703397	C/G	6	48019015	1.66667	1.184	0.232863	0.072619	0.135945	0.140659	0.479986	0.46582	0.831518	0.684598	0.115178	0.431375	0.338333	5.3121e-56
snp_sb001000703435	C/T	6	48022337	1.58333	1.15608	0.192138	0.0585317	0.1125	0.116386	0.431674	0.479716	0.859539	0.730031	0.0924512	0.417304	0.330232	1.13701e-59
snp_sb001000703506	A/C	6	48046955	1.375	1.12646	0.133269	0.055754	0.081481	0.084298	0.271008	0.315743	0.729695	0.604966	0.163246	0.206609	0.185266	1.49647e-43
snp_sb001000703591	C/A	6	48091568	1.58333	1.18873	0.20485	0.0585317	0.124537	0.128838	0.460714	0.530004	0.805752	0.586703	0.17611	0.301848	0.256292	1.11443e-52
snp_sb001000703641	C/T	6	48120255	1.5	1.22733	0.219383	0.0724206	0.14074	0.145601	0.424465	0.485431	0.7942	0.600054	0.166629	0.35248	0.290359	3.23835e-51
snp_sb001000703801	C/T	6	48212057	1.625	1.32261	0.300922	0.0753968	0.196037	0.202823	0.633682	0.615396	0.832818	0.565313	0.192233	0.451335	0.349483	3.64679e-56
snp_sb001000703881	G/A	6	48247578	1.54167	1.14556	0.177182	0.0390873	0.103703	0.107287	0.507313	0.623085	0.894211	0.71933	0.0975458	0.370078	0.301599	1.90142e-64
snp_sb001000703914	T/C	6	48277496	1.375	1.11065	0.123711	0.0474206	0.0736106	0.0761563	0.29511	0.355791	0.767694	0.639394	0.140995	0.204472	0.183567	5.09968e-48
snp_sb001000704016	A/G	6	48331622	1.375	1.08821	0.114442	0.0501984	0.0651847	0.0674398	0.245975	0.229905	0.734377	0.655078	0.131634	0.189291	0.171375	4.24921e-44
snp_sb001000704120	C/G	6	48553823	1.375	1.09295	0.111961	0.0474206	0.0652773	0.0675356	0.196738	0.273551	0.595942	0.443791	0.313328	0.117492	0.11059	1.16002e-29
snp_sb001000704129	T/C	6	48554466	1.375	1.09295	0.111961	0.0474206	0.0652773	0.0675356	0.196738	0.273551	0.595942	0.443791	0.313328	0.117492	0.11059	1.16002e-29
snp_sb001000704130	C/G	6	48554934	1.625	1.1995	0.218447	0.0531746	0.132149	0.136731	0.515428	0.597615	0.879521	0.700588	0.106843	0.440348	0.343395	2.16422e-62
snp_sb001000704367	G/A	6	48610679	1.375	1.19524	0.185609	0.05	0.120926	0.125096	0.609185	0.586524	0.815026	0.552638	0.202376	0.270917	0.234219	8.71934e-54
snp_sb001000704426	G/T	6	48637484	1.625	1.27275	0.266208	0.0863095	0.169824	0.1757	0.376414	0.49177	0.747153	0.502494	0.247519	0.341699	0.28332	1.64056e-45
snp_sb001000704497	A/C	6	48658149	1.25	1.08403	0.0913104	0.0196429	0.0553793	0.0573093	0.595762	0.645304	0.873747	0.644053	0.138167	0.155481	0.143394	1.12666e-61
snp_sb001000704585	A/T	6	48682625	1.5	1.24604	0.238653	0.0559524	0.154093	0.159433	0.600428	0.636892	0.865441	0.629424	0.147189	0.416167	0.329569	1.59793e-60
snp_sb001000704968	C/T	6	49314267	1.625	1.253	0.250181	0.0694444	0.15787	0.163314	0.504989	0.560117	0.859101	0.679689	0.117815	0.493156	0.371555	1.5655e-59
snp_sb001000705015	G/A	6	49342716	1.5	1.19387	0.197554	0.0361111	0.123426	0.127682	0.641791	0.707427	0.92019	0.727215	0.0937775	0.453057	0.350427	4.64406e-68
snp_sb001000705080	A/G	6	49378237	1.66667	1.26668	0.257328	0.0668651	0.162777	0.168398	0.444303	0.589224	0.864235	0.669492	0.123417	0.492144	0.371041	2.95647e-60
snp_sb001000705282	A/T	6	49672003	1.33333	1.14508	0.142116	0.0444444	0.0905556	0.0936782	0.460562	0.509202	0.76995	0.531272	0.220568	0.193667	0.174914	3.39874e-48
snp_sb001000705513	C/T	6	49720484	1.33333	1.11072	0.118359	0.0527778	0.0717593	0.0742337	0.293573	0.264516	0.756406	0.668798	0.123805	0.217181	0.193597	1.42055e-46
snp_sb001000705699	A/G	6	49773228	1.58333	1.17114	0.193375	0.0640873	0.115194	0.119187	0.4222	0.443658	0.835712	0.704699	0.104762	0.390504	0.314257	1.68098e-56
snp_sb001000705807	A/T	6	49822728	1.41667	1.12055	0.141493	0.0333333	0.0838889	0.0867816	0.486244	0.602649	0.908335	0.769309	0.0749669	0.364336	0.297966	2.27453e-66
snp_sb001000705914	C/A	6	49878045	1.75	1.19779	0.237043	0.0501984	0.13899	0.143804	0.450464	0.638836	0.884605	0.680492	0.117381	0.43544	0.340636	4.35684e-63
snp_sb001000705925	A/G	6	49887077	1.66667	1.17261	0.204724	0.0446429	0.119916	0.124072	0.399252	0.627717	0.89539	0.719005	0.0977029	0.427185	0.335941	1.35722e-64
snp_sb001000706185	T/C	6	50084963	1.625	1.30147	0.282659	0.0751984	0.182787	0.18911	0.523364	0.5886	0.839389	0.609599	0.160106	0.468576	0.358794	5.74365e-57
snp_sb001000706358	T/G	6	50157808	1.66667	1.18133	0.22819	0.0640873	0.133898	0.138535	0.437668	0.521372	0.823207	0.630626	0.146431	0.362881	0.29704	7.03925e-55
snp_sb001000706561	A/G	6	50295459	1.45833	1.09716	0.129705	0.0363095	0.0724164	0.0749339	0.471038	0.498601	0.663585	0.329048	0.509767	0.107685	0.101887	2.86941e-36
snp_sb001000706650	T/C	6	50338989	1.45833	1.10071	0.131745	0.0390873	0.0743608	0.0769454	0.351819	0.474356	0.810777	0.640016	0.140615	0.206609	0.185266	2.56112e-53
snp_sb001000706796	C/T	6	50362709	1.375	1.10906	0.127892	0.0501984	0.0758423	0.0784779	0.347115	0.338121	0.707353	0.557853	0.198146	0.171476	0.156774	5.49157e-41
snp_sb001000706935	A/G	6	50443940	1.29167	1.10136	0.101445	0.0472222	0.0625	0.0646552	0.140299	0.244444	0.686146	0.584605	0.177639	0.150841	0.139464	1.23746e-38
snp_sb001000707047	C/T	6	50484789	1.5	1.11322	0.15279	0.0335317	0.0867682	0.0897806	0.469592	0.613548	0.774397	0.416221	0.350643	0.148509	0.137482	8.32481e-49
snp_sb001000707060	T/C	6	50486545	1.5	1.11322	0.15279	0.0335317	0.0867682	0.0897806	0.469592	0.613548	0.774397	0.416221	0.350643	0.148509	0.137482	8.32481e-49
snp_sb001000707134	G/A	6	50501595	1.5	1.11322	0.15279	0.0335317	0.0867682	0.0897806	0.469592	0.613548	0.774397	0.416221	0.350643	0.148509	0.137482	8.32481e-49
snp_sb001000707825	G/C	6	50674893	1.70833	1.26308	0.276278	0.0722222	0.171296	0.177203	0.461602	0.578378	0.846814	0.636673	0.142666	0.47197	0.360592	6.73162e-58
snp_sb001000708211	C/A	6	50797214	1.41667	1.08819	0.115384	0.0224206	0.0647312	0.0669837	0.454144	0.653635	0.920455	0.770342	0.0745311	0.28209	0.242302	3.41092e-68
snp_sb001000708218	C/T	6	50797810	1.41667	1.08819	0.115384	0.0224206	0.0647312	0.0669837	0.454144	0.653635	0.920455	0.770342	0.0745311	0.28209	0.242302	3.41092e-68
snp_sb001000708273	T/C	6	50827928	1.66667	1.28324	0.282673	0.0670635	0.179463	0.185678	0.515546	0.626311	0.854589	0.610877	0.159248	0.460425	0.354429	5.36395e-59
snp_sb001000709370	T/G	6	51378543	1.33333	1.15773	0.15007	0.047619	0.0967782	0.100141	0.406876	0.507957	0.822952	0.640179	0.140516	0.269027	0.232839	6.0107e-55
snp_sb001000709457	C/T	6	51413506	1.54167	1.25596	0.241329	0.0472222	0.155435	0.160809	0.645036	0.696192	0.898509	0.665937	0.125411	0.46572	0.357273	5.76159e-65
snp_sb001000709800	C/T	6	51540248	1.58333	1.28972	0.265968	0.072619	0.172611	0.17859	0.483806	0.579292	0.822083	0.577102	0.183199	0.406794	0.324053	1.09315e-54
snp_sb001000710036	A/G	6	51604058	1.625	1.19391	0.213218	0.0613095	0.12825	0.132692	0.343165	0.521952	0.840124	0.665565	0.125621	0.383889	0.310204	4.41054e-57
snp_sb001000710207	A/T	6	51668191	1.58333	1.249	0.25484	0.0474206	0.160742	0.166316	0.627476	0.704989	0.888999	0.62374	0.150808	0.426118	0.33533	1.20689e-63
snp_sb001000710540	A/G	6	51799302	1.45833	1.1367	0.151064	0.0416667	0.090463	0.0935824	0.451844	0.539406	0.850991	0.676486	0.119557	0.280247	0.240978	1.77593e-58
snp_sb001000710765	C/G	6	51870339	1.625	1.1895	0.218027	0.0527778	0.130064	0.134563	0.471757	0.594218	0.849231	0.628448	0.147805	0.347906	0.287387	4.49139e-58
snp_sb001000710785	G/C	6	51877933	1.58333	1.22724	0.228713	0.0527778	0.143583	0.148548	0.469181	0.632423	0.893649	0.710669	0.101781	0.496027	0.373006	2.91019e-64
snp_sb001000711539	A/G	6	52154464	1.29167	1.07313	0.0880483	0.030754	0.0512032	0.0529762	0.235092	0.399374	0.817974	0.69694	0.108711	0.169214	0.154898	2.68746e-54
snp_sb001000711569	C/T	6	52168034	1.58333	1.14207	0.175553	0.0513889	0.101511	0.105082	0.393036	0.493762	0.723954	0.454711	0.299799	0.187191	0.169671	9.59275e-43
snp_sb001000711882	C/G	6	52381281	1.33333	1.11959	0.123306	0.0527778	0.0756481	0.0782567	0.312717	0.302326	0.871909	0.816403	0.0562214	0.41271	0.327545	2.74328e-61
snp_sb001000711955	G/T	6	52441508	1.625	1.1501	0.185561	0.0474206	0.10649	0.110183	0.431565	0.554696	0.746553	0.430846	0.330254	0.187091	0.16959	1.82463e-45
snp_sb001000711973	T/G	6	52451173	1.625	1.15698	0.190789	0.0474206	0.110565	0.114397	0.440257	0.571104	0.653592	0.192326	1.04988	0.136735	0.127386	3.13151e-35
snp_sb001000711991	T/C	6	52465982	1.66667	1.2151	0.236141	0.055754	0.142872	0.14783	0.442899	0.609762	0.888375	0.713957	0.100161	0.499531	0.374765	1.37046e-63
snp_sb001000712256	C/T	6	52635976	1.16667	1.06861	0.0656545	0.0277778	0.0416667	0.0431034	0.199672	0.333333	0.757934	0.636902	0.142525	0.115052	0.108433	9.22608e-47
snp_sb001000712610	C/G	6	52868836	1.375	1.06821	0.100807	0.0335317	0.0547312	0.0566388	0.246995	0.387338	0.901314	0.838922	0.0480013	0.340128	0.282284	1.91147e-65
snp_sb001000712750	G/C	6	53156521	1.58333	1.22297	0.217804	0.0638889	0.136731	0.14146	0.391825	0.53274	0.867073	0.715517	0.0993976	0.48099	0.365314	1.29734e-60
snp_sb001000712921	A/G	6	53254560	1.41667	1.09851	0.125699	0.0363095	0.0722312	0.0747423	0.371562	0.497315	0.801254	0.60463	0.163476	0.182669	0.165985	4.04225e-52
snp_sb001000712936	T/C	6	53260931	1.16667	1.06868	0.0711655	0.025	0.0450926	0.0466475	0.338165	0.445585	0.833842	0.7003	0.10699	0.150841	0.139464	3.19794e-56
snp_sb001000713148	T/C	6	53402074	1.375	1.12728	0.133471	0.0472222	0.0819444	0.0847701	0.355914	0.423729	0.763519	0.589637	0.17399	0.200173	0.180138	2.01474e-47
snp_sb001000713476	T/C	6	53642513	1.16667	1.06612	0.0638566	0.0333333	0.0401852	0.0415709	0.0926293	0.170507	0.696587	0.634218	0.144186	0.110148	0.104082	9.07677e-40
snp_sb001000713533	T/A	6	53664726	1.16667	1.06612	0.0638566	0.0333333	0.0401852	0.0415709	0.0926293	0.170507	0.696587	0.634218	0.144186	0.110148	0.104082	9.07677e-40
snp_sb001000713602	T/C	6	53690086	1.25	1.07801	0.0838955	0.0333333	0.0505556	0.0522989	0.246519	0.340659	0.81011	0.712	0.101124	0.175976	0.160492	3.63524e-53
snp_sb001000713611	T/G	6	53691094	1.25	1.07801	0.0838955	0.0333333	0.0505556	0.0522989	0.246519	0.340659	0.81011	0.712	0.101124	0.175976	0.160492	3.63524e-53
snp_sb001000713614	C/A	6	53691551	1.25	1.07801	0.0838955	0.0333333	0.0505556	0.0522989	0.246519	0.340659	0.81011	0.712	0.101124	0.175976	0.160492	3.63524e-53
snp_sb001000714037	C/T	6	54067123	1.25	1.05869	0.0826359	0.0194444	0.0465741	0.0481801	0.561818	0.582505	0.82687	0.585311	0.177123	0.112604	0.106264	2.5687e-55
snp_sb001000714064	C/A	6	54068708	1.79167	1.28529	0.308939	0.0585317	0.189816	0.196393	0.620715	0.69164	0.881842	0.616819	0.155305	0.495515	0.372748	1.09804e-62
snp_sb001000714492	T/C	6	54267402	1.54167	1.11662	0.156958	0.0529762	0.0883423	0.091409	0.326525	0.40033	0.740866	0.567872	0.19024	0.204472	0.183567	8.49924e-45
snp_sb001000715128	T/C	6	54881469	1.375	1.16316	0.152173	0.0472222	0.0978704	0.101245	0.378832	0.517502	0.72751	0.43525	0.324382	0.17373	0.158639	3.2342e-43
snp_sb001000715230	T/C	6	54891931	1.375	1.16316	0.152173	0.0472222	0.0978704	0.101245	0.378832	0.517502	0.72751	0.43525	0.324382	0.17373	0.158639	3.2342e-43
snp_sb001000715384	G/C	6	55213567	1.20833	1.06796	0.068286	0.0305556	0.0423148	0.0437739	0.141086	0.277899	0.739259	0.638914	0.141289	0.117492	0.11059	1.43157e-44
snp_sb001000715501	A/G	6	55641669	1.79167	1.23108	0.259013	0.080754	0.154453	0.1598	0.378786	0.477163	0.791587	0.60138	0.165711	0.387881	0.312655	7.19522e-51
snp_sb001000715511	A/T	6	55645668	1.79167	1.23108	0.259013	0.080754	0.154453	0.1598	0.378786	0.477163	0.791587	0.60138	0.165711	0.387881	0.312655	7.19522e-51
snp_sb001000715871	C/A	6	55746081	1.66667	1.20746	0.240973	0.0474206	0.144268	0.149263	0.552929	0.671302	0.904631	0.709857	0.102183	0.497377	0.373685	7.0432e-66
snp_sb001000716154	C/T	6	56166377	1.16667	1.03843	0.0465473	0.0111111	0.0268519	0.0277778	0.214901	0.586207	0.888872	0.73144	0.0917915	0.100248	0.0952227	1.21355e-63
snp_sb001000716159	G/A	6	56172025	1.625	1.21542	0.223672	0.0753968	0.138027	0.142801	0.3042	0.453754	0.781048	0.59917	0.167244	0.344818	0.285368	1.17774e-49
snp_sb001000716199	C/T	6	56194451	1.5	1.11145	0.143717	0.0559524	0.0808976	0.0837013	0.326301	0.308355	0.664658	0.515153	0.235293	0.166945	0.153009	1.5475e-36
snp_sb001000716273	C/T	6	56217492	1.125	1.05046	0.0451759	0.0111111	0.0287037	0.0296935	0.253585	0.612903	0.903174	0.749866	0.0833931	0.115052	0.108433	1.20021e-65
snp_sb001000716365	C/G	6	56262484	1.5	1.18856	0.187008	0.05	0.117037	0.121073	0.316363	0.572785	0.86139	0.675551	0.120068	0.361419	0.296107	7.26016e-60
snp_sb001000716366	C/G	6	56263397	1.25	1.107	0.0996923	0.0416667	0.0634259	0.065613	0.240615	0.343066	0.714218	0.564976	0.192497	0.14617	0.135487	1.02345e-41
snp_sb001000716417	T/C	6	56340424	1.125	1.05669	0.0512393	0.00833333	0.0330556	0.0341954	0.565887	0.747899	0.922411	0.69223	0.111151	0.107685	0.101887	2.14692e-68
snp_sb001000716455	G/A	6	56343707	1.16667	1.06298	0.0615374	0.0166667	0.0383333	0.0396552	0.295958	0.565217	0.866071	0.691964	0.11129	0.124766	0.116983	1.6434e-60
snp_sb001000716779	T/C	6	56609287	1.125	1.0742	0.06704	0.025	0.044537	0.0460728	0.467803	0.438669	0.786667	0.619951	0.153258	0.117492	0.11059	3.08319e-50
snp_sb001000716836	C/G	6	56635377	1.25	1.06442	0.071729	0.0166667	0.0425926	0.0440613	0.2409	0.608696	0.927885	0.815705	0.0564833	0.231656	0.204823	3.48615e-69
snp_sb001000716914	G/C	6	56643008	1.20833	1.06516	0.0674259	0.0111111	0.0414815	0.0429119	0.342043	0.732143	0.951057	0.81728	0.0558929	0.227559	0.201667	1.36802e-72
snp_sb001000716915	A/C	6	56647307	1.20833	1.06516	0.0674259	0.0111111	0.0414815	0.0429119	0.342043	0.732143	0.951057	0.81728	0.0558929	0.227559	0.201667	1.36802e-72
snp_sb001000717221	A/C	6	56706182	1.66667	1.17737	0.217518	0.05	0.127037	0.131418	0.473013	0.606414	0.851315	0.622229	0.151781	0.336962	0.28019	1.62253e-58
snp_sb001000717407	T/C	6	56823241	1.5	1.10953	0.135334	0.0531746	0.0769161	0.0795825	0.2457	0.308667	0.506524	0.286195	0.623529	0.107685	0.101887	5.68446e-22
snp_sb001000717436	T/C	6	56827757	1.5	1.10953	0.135334	0.0531746	0.0769161	0.0795825	0.2457	0.308667	0.506524	0.286195	0.623529	0.107685	0.101887	5.68446e-22
snp_sb001000717470	C/G	6	56832119	1.5	1.10953	0.135334	0.0531746	0.0769161	0.0795825	0.2457	0.308667	0.506524	0.286195	0.623529	0.107685	0.101887	5.68446e-22
snp_sb001000717540	A/C	6	56895878	1.5	1.15616	0.176552	0.0642857	0.106361	0.110042	0.371052	0.395587	0.724609	0.544366	0.20925	0.233692	0.206386	4.89377e-43
snp_sb001000717574	G/T	6	56899037	1.29167	1.10242	0.106158	0.0388889	0.0659259	0.0681992	0.318062	0.410112	0.783951	0.633745	0.144481	0.180446	0.164165	6.70454e-50
snp_sb001000717596	G/C	6	56901011	1.54167	1.11986	0.158612	0.0448413	0.0899717	0.0930882	0.359341	0.501607	0.829494	0.657889	0.130004	0.263313	0.228646	8.00882e-56
snp_sb001000717878	A/C	6	56937090	1.54167	1.10026	0.139249	0.0448413	0.0764531	0.0791036	0.27279	0.41348	0.715691	0.515262	0.235191	0.157789	0.14534	4.25599e-42
snp_sb001000717892	G/A	6	56937691	1.54167	1.11036	0.147817	0.0420635	0.082842	0.0857128	0.336746	0.492245	0.798295	0.602752	0.164764	0.208739	0.186953	7.05723e-52
snp_sb001000718063	G/T	6	56974070	1.58333	1.10585	0.153859	0.0452686	0.0838868	0.0868106	0.309465	0.460361	0.781039	0.594245	0.170702	0.207612	0.186061	1.16073e-49
snp_sb001000718066	C/T	6	56975436	1.58333	1.10585	0.153859	0.0452686	0.0838868	0.0868106	0.309465	0.460361	0.781039	0.594245	0.170702	0.207612	0.186061	1.16073e-49
snp_sb001000718172	C/T	6	57050176	1.375	1.15413	0.153504	0.0333333	0.0968519	0.100192	0.5769	0.655832	0.931429	0.800762	0.0622027	0.486495	0.368156	1.10269e-69
snp_sb001000718185	C/A	6	57051380	1.41667	1.157	0.159593	0.0361111	0.099537	0.102969	0.515762	0.637209	0.925643	0.795041	0.0644491	0.486034	0.367919	7.65875e-69
snp_sb001000718265	G/T	6	57063875	1.58333	1.23404	0.23145	0.0638889	0.146204	0.151245	0.465705	0.563015	0.872198	0.707536	0.103339	0.49986	0.37493	2.68558e-61
snp_sb001000718335	A/G	6	57087853	1.54167	1.20851	0.216766	0.0472222	0.135093	0.139751	0.543985	0.650446	0.905432	0.729462	0.0927183	0.499441	0.374721	6.19539e-66
snp_sb001000718336	G/A	6	57093254	1.45833	1.19316	0.185448	0.05	0.117963	0.122031	0.498885	0.576138	0.896071	0.754804	0.081212	0.481529	0.365594	1.2703e-64
snp_sb001000718414	A/T	6	57133203	1.625	1.21793	0.231506	0.0642857	0.141916	0.146824	0.440406	0.547016	0.868564	0.709845	0.10219	0.488687	0.36928	6.73203e-61
snp_sb001000718499	C/G	6	57171484	1.66667	1.19279	0.226747	0.0920635	0.134138	0.138778	0.284173	0.313667	0.558533	0.356774	0.450724	0.208739	0.186953	2.86993e-26
snp_sb001000718726	G/C	6	57325067	1.41667	1.12634	0.142558	0.0666667	0.0851852	0.0881226	0.23592	0.217391	0.364706	0.188235	1.07812	0.105213	0.0996784	4.90781e-12
snp_sb001000718864	G/A	6	57405764	1.375	1.15802	0.155119	0.0722222	0.0983333	0.101724	0.276792	0.265537	0.698065	0.588903	0.174518	0.239756	0.211015	6.3896e-40
snp_sb001000718874	C/A	6	57406525	1.375	1.15802	0.155119	0.0722222	0.0983333	0.101724	0.276792	0.265537	0.698065	0.588903	0.174518	0.239756	0.211015	6.3896e-40
snp_sb001000719123	G/A	6	57647043	1.66667	1.2722	0.262566	0.0583333	0.166175	0.17192	0.541884	0.648965	0.87942	0.6565	0.130807	0.484109	0.366928	2.65355e-62
snp_sb001000719127	G/T	6	57647287	1.66667	1.2722	0.262566	0.0583333	0.166175	0.17192	0.541884	0.648965	0.87942	0.6565	0.130807	0.484109	0.366928	2.65355e-62
snp_sb001000719254	G/T	6	57704110	1.625	1.23252	0.232372	0.0559524	0.144463	0.149471	0.430664	0.612688	0.887759	0.710204	0.102011	0.498599	0.374299	1.46492e-63
snp_sb001000719315	G/A	6	57760061	1.66667	1.1657	0.209131	0.0809524	0.120435	0.124602	0.25262	0.327831	0.603724	0.410452	0.359085	0.204472	0.183567	2.05095e-30
snp_sb001000719459	A/C	6	57842306	1.66667	1.16311	0.202613	0.0892857	0.116453	0.120483	0.175522	0.233291	0.567446	0.435831	0.323617	0.206609	0.185266	4.61969e-27
snp_sb001000719606	A/T	6	57947690	1.66667	1.12089	0.174468	0.0587302	0.0948791	0.0981649	0.291533	0.381	0.66173	0.453522	0.301241	0.17373	0.158639	3.18075e-36
snp_sb001000719669	T/C	6	58035596	1.58333	1.12659	0.171644	0.0665584	0.0961057	0.0996713	0.306505	0.307446	0.75827	0.650959	0.134049	0.273374	0.236008	4.34393e-48
snp_sb001000719671	A/G	6	58036183	1.58333	1.12494	0.167987	0.0615079	0.0940457	0.0973028	0.296067	0.345978	0.751425	0.619929	0.153272	0.247732	0.217047	3.86676e-46
snp_sb001000719789	G/C	6	58131310	1.625	1.1555	0.187993	0.0809524	0.108953	0.112724	0.152508	0.256998	0.446034	0.254422	0.732618	0.14617	0.135487	2.32728e-17
snp_sb001000719922	G/A	6	58190942	1.41667	1.15084	0.152246	0.0583333	0.0950926	0.0983716	0.229241	0.386563	0.679871	0.478139	0.27286	0.182669	0.165985	5.84757e-38
snp_sb001000719923	T/G	6	58191746	1.375	1.13299	0.131864	0.05	0.0822222	0.0850575	0.205678	0.391892	0.69975	0.506255	0.243822	0.166945	0.153009	4.12294e-40
snp_sb001000720059	C/A	6	58496778	1.16667	1.0817	0.0752851	0.0361111	0.0491667	0.0508621	0.29177	0.265537	0.744087	0.651565	0.133691	0.141468	0.131461	3.94423e-45
snp_sb001000720111	C/A	6	58537465	1.29167	1.06929	0.0906145	0.0277778	0.0522222	0.054023	0.311852	0.468085	0.747155	0.524652	0.226506	0.110148	0.104082	1.72094e-45
snp_sb001000720307	C/T	6	58638883	1.58333	1.13809	0.165454	0.122619	0.0949717	0.0982607	-0.140332	-0.291112	-0.0221641	0.208307	0.95015	0.119925	0.112734	0.676824
snp_sb001000720335	T/C	6	58654811	1.58333	1.17936	0.206107	0.0781746	0.123675	0.127954	0.317359	0.367905	0.68407	0.500186	0.249814	0.247732	0.217047	1.54675e-38
snp_sb001000720450	T/C	6	58735206	1.41667	1.10063	0.115044	0.0587302	0.0669161	0.0692377	0.0508823	0.122331	0.69986	0.658026	0.129924	0.195843	0.176666	2.71776e-40
snp_sb001000720600	G/A	6	58860779	1.45833	1.1179	0.142714	0.0361111	0.0826852	0.0855364	0.47264	0.56327	0.767158	0.466852	0.285501	0.155481	0.143394	7.3312e-48
snp_sb001000720897	A/T	6	59157048	1.58333	1.09158	0.142915	0.0559524	0.0755272	0.0781457	0.14774	0.259176	0.634557	0.506708	0.243381	0.153165	0.141435	1.81154e-33
snp_sb001000721176	A/T	6	59300084	1.20833	1.08973	0.0827813	0.0361111	0.0532407	0.0550766	0.256842	0.321739	0.773864	0.666594	0.125041	0.16009	0.147275	1.13761e-48
snp_sb001000721256	G/T	6	59322247	1.20833	1.08973	0.0827813	0.0361111	0.0532407	0.0550766	0.256842	0.321739	0.773864	0.666594	0.125041	0.16009	0.147275	1.13761e-48
snp_sb001000721736	T/C	6	59535899	1.29167	1.07735	0.0876919	0.05	0.0512963	0.0530651	0.100773	0.0252708	0.746875	0.740313	0.0876952	0.198012	0.178408	1.87847e-45
snp_sb001000721766	G/A	6	59589933	1.20833	1.02063	0.0379026	0.0138889	0.0182407	0.0188697	0.0983397	0.238579	0.910446	0.882385	0.033323	0.155481	0.143394	1.11817e-66
snp_sb001000721900	C/T	6	59999698	1.41667	1.11674	0.130209	0.0503968	0.0770087	0.0796783	0.234741	0.34557	0.72051	0.572927	0.186356	0.180446	0.164165	1.29124e-42
snp_sb001000722037	A/G	6	60025425	1.41667	1.11674	0.130209	0.0503968	0.0770087	0.0796783	0.234741	0.34557	0.72051	0.572927	0.186356	0.180446	0.164165	1.29124e-42
snp_sb001000722223	C/T	6	60124673	1.625	1.24622	0.236573	0.0837302	0.148861	0.154008	0.261888	0.437526	0.82244	0.684324	0.115324	0.47197	0.360592	8.18003e-55
snp_sb001000722230	T/C	6	60125608	1.58333	1.20507	0.207261	0.072619	0.127935	0.13236	0.259132	0.432374	0.849733	0.735271	0.0900105	0.483609	0.36667	2.1765e-58
snp_sb001000722624	A/C	6	60311964	1.625	1.17698	0.207706	0.0642857	0.122704	0.126961	0.379363	0.476091	0.776365	0.573141	0.186193	0.287571	0.246223	4.38239e-49
snp_sb001000723307	G/C	6	60680119	1.625	1.29822	0.269646	0.0670635	0.17576	0.181846	0.386469	0.618436	0.865775	0.648225	0.135669	0.499686	0.374843	1.56023e-60
snp_sb001000723312	G/A	6	60687309	1.875	1.58027	0.458928	0.550397	0.31349	0.324314	-0.570578	-0.755707	-0.379688	0.21417	0.9173	0.399438	0.319663	5.41138e-13
snp_sb001000723318	G/C	6	60692332	1.54167	1.1105	0.143243	0.0472222	0.0804346	0.0832223	0.192519	0.412912	0.874603	0.786409	0.0679008	0.37708	0.305986	1.18919e-61
snp_sb001000723739	T/A	6	60908842	1.54167	1.09254	0.137938	0.0559524	0.0744161	0.0769963	0.150306	0.248115	0.634557	0.513965	0.236415	0.153165	0.141435	1.81154e-33
snp_sb001000723812	G/A	6	60992689	1.66667	1.33512	0.3038	0.0555556	0.19812	0.204966	0.579008	0.719586	0.888467	0.602256	0.165106	0.497948	0.373972	1.5351e-63
snp_sb001000723852	G/T	6	61023837	1.54167	1.26833	0.250667	0.0531746	0.162519	0.168149	0.529558	0.67281	0.868561	0.598279	0.167865	0.403151	0.321886	7.11766e-61
snp_sb001000723860	T/A	6	61031924	1.66667	1.34231	0.314337	0.0753968	0.205297	0.212402	0.528363	0.632742	0.847571	0.584954	0.177384	0.494398	0.372183	4.48932e-58
snp_sb001000723965	A/G	6	61114540	1.70833	1.25915	0.276698	0.0753968	0.170249	0.176134	0.432758	0.557139	0.849197	0.65948	0.129087	0.499984	0.374992	2.66931e-58
snp_sb001000723987	G/C	6	61126978	1.66667	1.27144	0.283227	0.075	0.177101	0.183222	0.494407	0.576514	0.848015	0.64111	0.139949	0.493156	0.371555	5.04647e-58
snp_sb001000724129	G/T	6	61153698	1.66667	1.27144	0.283227	0.075	0.177101	0.183222	0.494407	0.576514	0.848015	0.64111	0.139949	0.493156	0.371555	5.04647e-58
snp_sb001000724245	T/C	6	61176174	1.66667	1.27144	0.283227	0.075	0.177101	0.183222	0.494407	0.576514	0.848015	0.64111	0.139949	0.493156	0.371555	5.04647e-58
snp_sb001000724447	A/G	6	61216366	1.58333	1.24839	0.25651	0.0753968	0.161223	0.166808	0.432476	0.532343	0.815813	0.60615	0.162439	0.407993	0.324764	7.0277e-54
snp_sb001000724624	G/C	6	61255617	1.66667	1.27144	0.283227	0.075	0.177101	0.183222	0.494407	0.576514	0.848015	0.64111	0.139949	0.493156	0.371555	5.04647e-58
snp_sb001001036965	A/C	10	71056	1.54167	1.18343	0.198658	0.0839286	0.120472	0.124647	0.37441	0.303335	0.706043	0.578052	0.182487	0.285752	0.244925	5.55129e-41
snp_sb001001036989	C/G	10	84927	1.54167	1.18343	0.198658	0.0839286	0.120472	0.124647	0.37441	0.303335	0.706043	0.578052	0.182487	0.285752	0.244925	5.55129e-41
snp_sb001001037108	A/G	10	113148	1.5	1.17428	0.185113	0.0811508	0.112972	0.116888	0.353142	0.281673	0.652577	0.516344	0.234174	0.233692	0.206386	2.68521e-35
snp_sb001001037135	C/G	10	137871	1.54167	1.18343	0.198658	0.0839286	0.120472	0.124647	0.37441	0.303335	0.706043	0.578052	0.182487	0.285752	0.244925	5.55129e-41
snp_sb001001037476	C/T	10	369664	1.58333	1.16496	0.190056	0.0611111	0.112564	0.11646	0.419722	0.4571	0.870766	0.761955	0.0781032	0.473274	0.36128	4.05712e-61
snp_sb001001037503	C/G	10	390312	1.58333	1.20733	0.224751	0.0696429	0.137602	0.142367	0.446972	0.49388	0.844951	0.693652	0.110411	0.449581	0.34852	1.046e-57
snp_sb001001037809	T/C	10	545142	1.29167	1.03952	0.0649856	0.0198413	0.0333976	0.0345633	0.202111	0.405907	0.908549	0.846067	0.045485	0.217181	0.193597	1.19509e-66
snp_sb001001038166	C/A	10	678456	1.45833	1.18708	0.181953	0.0472222	0.114907	0.11887	0.594689	0.589041	0.895233	0.745068	0.08554	0.451335	0.349483	1.64128e-64
snp_sb001001038285	A/G	10	759874	1.625	1.2312	0.235915	0.0920635	0.145805	0.150847	0.400895	0.368585	0.810816	0.700381	0.106948	0.486949	0.368389	2.57807e-53
snp_sb001001038314	G/C	10	783445	1.25	1.08861	0.0943721	0.0392857	0.0577494	0.0597549	0.346371	0.319721	0.707591	0.570162	0.188472	0.134356	0.125331	3.17131e-41
snp_sb001001038348	C/T	10	786919	1.625	1.21251	0.230204	0.0644841	0.140194	0.145049	0.389795	0.540037	0.837884	0.647546	0.136073	0.398185	0.318909	6.46627e-57
snp_sb001001039021	T/A	10	972446	1.33333	1.04467	0.0759746	0.025	0.0386111	0.0399425	0.292955	0.352518	0.756015	0.623179	0.151169	0.102734	0.0974571	1.55612e-46
snp_sb001001039322	G/T	10	1106378	1.29167	1.05619	0.0771635	0.0222222	0.0424074	0.0438697	0.34961	0.475983	0.85881	0.730562	0.0922024	0.157789	0.14534	1.57467e-59
snp_sb001001039447	G/C	10	1170097	1.625	1.27112	0.258966	0.0944444	0.165157	0.170866	0.405528	0.428153	0.80531	0.659542	0.129051	0.484602	0.367182	1.7949e-52
snp_sb001001039490	A/C	10	1202818	1.66667	1.2521	0.26737	0.105952	0.165945	0.171693	0.359021	0.36152	0.729355	0.57611	0.183945	0.391803	0.315048	1.71576e-43
snp_sb001001039517	T/A	10	1216464	1.58333	1.19466	0.216659	0.0613095	0.132139	0.136715	0.398946	0.536021	0.766996	0.497812	0.252197	0.263313	0.228646	6.99536e-48
snp_sb001001039551	G/A	10	1244072	1.58333	1.21158	0.226434	0.075	0.140249	0.1451	0.373768	0.465238	0.728445	0.492195	0.257929	0.276538	0.238301	2.75903e-43
snp_sb001001039555	T/C	10	1244306	1.58333	1.21158	0.226434	0.075	0.140249	0.1451	0.373768	0.465238	0.728445	0.492195	0.257929	0.276538	0.238301	2.75903e-43
snp_sb001001039577	A/G	10	1247429	1.58333	1.21158	0.226434	0.075	0.140249	0.1451	0.373768	0.465238	0.728445	0.492195	0.257929	0.276538	0.238301	2.75903e-43
snp_sb001001039628	T/C	10	1284697	1.625	1.15477	0.193136	0.0644841	0.111305	0.115164	0.37372	0.420655	0.862273	0.762271	0.0779674	0.468576	0.358794	3.8973e-60
snp_sb001001039822	T/G	10	1393968	1.70833	1.28698	0.280549	0.0833333	0.177222	0.183333	0.44003	0.529781	0.818157	0.613281	0.157643	0.458842	0.353574	3.65939e-54
snp_sb001001039940	G/A	10	1485692	1.5	1.27777	0.245173	0.0805556	0.162315	0.167912	0.505003	0.503708	0.77199	0.540573	0.212472	0.353989	0.291335	1.98775e-48
snp_sb001001040183	C/G	10	1586544	1.54167	1.16727	0.187568	0.0527778	0.11287	0.116762	0.459468	0.532404	0.893318	0.771849	0.0738974	0.494972	0.372473	3.13118e-64
snp_sb001001040220	G/A	10	1592337	1.54167	1.21313	0.215572	0.0726496	0.135026	0.139699	0.461415	0.46196	0.853381	0.727495	0.0936451	0.494944	0.372459	1.24094e-58
snp_sb001001040460	A/G	10	1854160	1.58333	1.28729	0.273071	0.1	0.176667	0.182759	0.357392	0.433962	0.796967	0.641308	0.139828	0.492827	0.371388	1.82899e-51
snp_sb001001040568	A/T	10	1920339	1.5	1.22045	0.206818	0.0583333	0.132315	0.136877	0.46254	0.559132	0.86675	0.697755	0.108292	0.438408	0.342307	1.39391e-60
snp_sb001001040860	A/G	10	1982788	1.20833	1.02439	0.042661	0.0113095	0.0212127	0.0219645	0.304644	0.466851	0.949363	0.905022	0.0262362	0.223431	0.19847	1.86453e-72
snp_sb001001040899	T/C	10	1993827	1.58333	1.33388	0.286942	0.0888889	0.191481	0.198084	0.462414	0.535783	0.753583	0.469176	0.282849	0.361419	0.296107	3.16294e-46
snp_sb001001041330	A/G	10	2340908	1.45833	1.15514	0.157289	0.0390873	0.0966662	0.100007	0.449091	0.595647	0.72785	0.326951	0.51464	0.143823	0.13348	2.2253e-43
snp_sb001001041331	A/G	10	2341157	1.45833	1.15514	0.157289	0.0390873	0.0966662	0.100007	0.449091	0.595647	0.72785	0.326951	0.51464	0.143823	0.13348	2.2253e-43
snp_sb001001041984	A/G	10	2758471	1.20833	1.07755	0.0799393	0.0416667	0.049537	0.0512452	0.190474	0.158879	0.658563	0.594069	0.170826	0.122349	0.114865	1.00016e-35
snp_sb001001042001	C/T	10	2771396	1.45833	1.09616	0.118105	0.0585317	0.0665736	0.0688766	0.12201	0.120796	0.58569	0.528767	0.222798	0.141468	0.131461	1.08779e-28
snp_sb001001042135	C/G	10	2859540	1.70833	1.27462	0.278814	0.0892857	0.173908	0.179931	0.493256	0.486592	0.79383	0.598429	0.167761	0.433423	0.339495	3.41851e-51
snp_sb001001042396	T/C	10	3024115	1.58333	1.2023	0.218517	0.097619	0.134186	0.138839	0.281283	0.272507	0.615081	0.470896	0.280903	0.253633	0.221468	1.94172e-31
snp_sb001001042462	G/T	10	3055990	1.25	1.10676	0.110959	0.0444444	0.0696296	0.0720307	0.422257	0.361702	0.753086	0.613169	0.157718	0.180446	0.164165	3.4885e-46
snp_sb001001042533	A/T	10	3077074	1.70833	1.23592	0.260179	0.114087	0.158055	0.163513	0.313063	0.27818	0.744915	0.646608	0.136633	0.447797	0.347536	3.07121e-45
snp_sb001001042680	G/T	10	3090618	1.66667	1.22336	0.242711	0.108333	0.148056	0.153161	0.316414	0.268293	0.742742	0.648414	0.135556	0.421773	0.332827	6.05154e-45
snp_sb001001043013	G/C	10	3210929	1.625	1.22403	0.23836	0.0448413	0.1465	0.151578	0.570528	0.693917	0.909678	0.704911	0.104655	0.496489	0.373238	1.95693e-66
snp_sb001001043049	C/T	10	3238987	1.25	1.12308	0.112222	0.0222222	0.0731481	0.0756705	0.614766	0.696203	0.921048	0.740117	0.0877843	0.28209	0.242302	3.41092e-68
snp_sb001001043054	G/T	10	3239223	1.25	1.12308	0.112222	0.0222222	0.0731481	0.0756705	0.614766	0.696203	0.921048	0.740117	0.0877843	0.28209	0.242302	3.41092e-68
snp_sb001001043209	T/G	10	3314979	1.58333	1.25687	0.244216	0.080754	0.15612	0.161524	0.413617	0.482745	0.835213	0.68142	0.116881	0.490301	0.370104	2.07152e-56
snp_sb001001043345	G/A	10	3553541	1.33333	1.08499	0.101719	0.0527778	0.0591667	0.0612069	0.10995	0.107981	0.649222	0.606759	0.162025	0.150841	0.139464	9.13129e-35
snp_sb001001043524	T/C	10	3624899	1.33333	1.15347	0.142008	0.0222222	0.0918519	0.0950192	0.500424	0.758065	0.8899	0.544919	0.208783	0.202326	0.181858	8.79202e-64
snp_sb001001043604	C/A	10	3779795	1.66667	1.29448	0.292828	0.0894841	0.18639	0.192849	0.4666	0.51991	0.812765	0.610001	0.159835	0.478178	0.363851	1.29063e-53
snp_sb001001043776	A/C	10	3814342	1.66667	1.24815	0.248179	0.0724206	0.154731	0.160087	0.384804	0.531958	0.855139	0.690495	0.112059	0.499903	0.374952	4.85696e-59
snp_sb001001043839	C/G	10	3859287	1.5	1.21036	0.198961	0.055754	0.126666	0.131041	0.385148	0.559835	0.853507	0.667185	0.124708	0.381189	0.308536	7.18997e-59
snp_sb001001043856	G/A	10	3866810	1.625	1.29266	0.272115	0.0920635	0.176593	0.182708	0.367828	0.478668	0.799556	0.615515	0.156164	0.459637	0.354004	6.70197e-52
snp_sb001001044535	A/G	10	4296995	1.70833	1.20514	0.233605	0.0474206	0.138425	0.143206	0.54066	0.657428	0.893973	0.690498	0.112058	0.447797	0.347536	2.14397e-64
snp_sb001001044583	G/C	10	4320623	1.33333	1.04974	0.0756898	0.0279762	0.0399164	0.0413132	0.12077	0.29913	0.767124	0.667732	0.124402	0.119925	0.112734	6.15906e-48
snp_sb001001044876	C/A	10	4488481	1.375	1.13257	0.128652	0.122421	0.0799995	0.0827655	-0.264153	-0.530267	-0.0652013	0.303911	0.572608	0.115052	0.108433	0.216118
snp_sb001001044897	A/C	10	4509323	1.58333	1.14283	0.164975	0.0505952	0.0961295	0.0994777	0.264741	0.473676	0.769491	0.562039	0.194809	0.219797	0.195641	3.12765e-48
snp_sb001001044987	G/A	10	4591093	1.29167	1.12544	0.119832	0.0392857	0.0765004	0.0791644	0.386384	0.486464	0.801735	0.613923	0.157217	0.198012	0.178408	2.78027e-52
snp_sb001001045354	G/C	10	5002954	1.41667	1.12367	0.137996	0.0640873	0.0826847	0.0855432	0.231963	0.22492	0.742903	0.668296	0.124086	0.249707	0.21853	4.6289e-45
snp_sb001001045566	A/G	10	5104450	1.5	1.15882	0.176597	0.0755952	0.107409	0.111144	0.1609	0.296192	0.743543	0.635616	0.143319	0.294772	0.251327	3.15713e-45
snp_sb001001045574	T/A	10	5105905	1.25	1.10081	0.100478	0.0529762	0.0636106	0.0658114	0.128727	0.16718	0.598063	0.517378	0.233206	0.131971	0.123262	7.52124e-30
snp_sb001001045636	A/G	10	5151950	1.20833	1.08478	0.0817049	0.0446429	0.0520366	0.0538383	0.0984727	0.142087	0.627315	0.565592	0.192015	0.119925	0.112734	1.10392e-32
snp_sb001001045833	G/A	10	5246054	1.33333	1.09831	0.108715	0.0474206	0.0654625	0.0677271	0.201467	0.275606	0.746127	0.649538	0.134889	0.187091	0.16959	1.82463e-45
snp_sb001001045972	T/G	10	5300910	1.41667	1.12472	0.139541	0.0642857	0.0840004	0.086923	0.15436	0.234697	0.376911	0.185827	1.09534	0.102734	0.0974571	9.93234e-13
snp_sb001001046060	G/A	10	5311636	1.41667	1.12472	0.139541	0.0642857	0.0840004	0.086923	0.15436	0.234697	0.376911	0.185827	1.09534	0.102734	0.0974571	9.93234e-13
snp_sb001001046218	A/G	10	5377651	1.625	1.1656	0.199797	0.0555556	0.117037	0.121073	0.412595	0.525316	0.88861	0.765339	0.0766525	0.498879	0.374439	1.43588e-63
snp_sb001001046225	G/C	10	5390630	1.41667	1.10611	0.122416	0.0531746	0.0721485	0.0746625	0.12348	0.262984	0.508128	0.332616	0.501617	0.107685	0.101887	5.68446e-22
snp_sb001001046299	C/A	10	5434721	1.375	1.13449	0.13135	0.0444444	0.082037	0.0848659	0.22691	0.458239	0.889904	0.796781	0.0637624	0.404373	0.322614	9.00908e-64
snp_sb001001046306	T/C	10	5440540	1.375	1.13449	0.13135	0.0444444	0.082037	0.0848659	0.22691	0.458239	0.889904	0.796781	0.0637624	0.404373	0.322614	9.00908e-64
snp_sb001001046360	C/T	10	5472246	1.25	1.04483	0.0636678	0.022619	0.0347714	0.0360062	0.171752	0.349492	0.916071	0.870979	0.0370334	0.26713	0.231451	1.47459e-67
snp_sb001001046404	G/C	10	5498047	1.25	1.04483	0.0636678	0.022619	0.0347714	0.0360062	0.171752	0.349492	0.916071	0.870979	0.0370334	0.26713	0.231451	1.47459e-67
snp_sb001001046437	G/A	10	5533228	1.625	1.1915	0.217047	0.0946429	0.13074	0.135256	0.268944	0.2761	0.785201	0.703275	0.10548	0.439382	0.342854	5.70777e-50
snp_sb001001046650	A/C	10	5655122	1.5	1.13694	0.165491	0.0363095	0.0973143	0.100677	0.525544	0.626884	0.882214	0.684318	0.115327	0.3088	0.261122	8.55608e-63
snp_sb001001047219	G/C	10	5972104	1.45833	1.11499	0.143226	0.0529762	0.0824995	0.0853517	0.277706	0.357861	0.760265	0.626661	0.14894	0.221355	0.196856	4.03927e-47
snp_sb001001047223	C/A	10	5974084	1.41667	1.10569	0.130204	0.0501984	0.0751847	0.0777846	0.226132	0.332332	0.761534	0.642838	0.1389	0.210861	0.18863	2.8178e-47
snp_sb001001047519	C/G	10	6047480	1.5	1.15264	0.179833	0.0305556	0.10713	0.110824	0.612817	0.71478	0.938877	0.785699	0.0681878	0.49986	0.37493	9.09646e-71
snp_sb001001047558	T/C	10	6058965	1.45833	1.17526	0.181854	0.0388889	0.113148	0.11705	0.559239	0.656301	0.905882	0.726162	0.0942756	0.41387	0.328226	5.11464e-66
snp_sb001001047804	A/G	10	6152515	1.625	1.16279	0.196562	0.0640873	0.115092	0.119068	0.366659	0.443165	0.796604	0.634728	0.14387	0.315628	0.265818	1.58683e-51
snp_sb001001047907	A/G	10	6229557	1.5	1.20419	0.200638	0.0863095	0.127416	0.13183	0.235444	0.322618	0.746654	0.625993	0.149366	0.338549	0.281241	3.08951e-45
snp_sb001001048038	G/A	10	6311526	1.625	1.18283	0.218399	0.0755952	0.129824	0.134321	0.373695	0.417709	0.8049	0.664945	0.125971	0.387881	0.312655	1.14885e-52
snp_sb001001048040	G/A	10	6311657	1.625	1.18283	0.218399	0.0755952	0.129824	0.134321	0.373695	0.417709	0.8049	0.664945	0.125971	0.387881	0.312655	1.14885e-52
snp_sb001001048051	A/G	10	6312611	1.625	1.18283	0.218399	0.0755952	0.129824	0.134321	0.373695	0.417709	0.8049	0.664945	0.125971	0.387881	0.312655	1.14885e-52
snp_sb001001048372	C/A	10	6503496	1.625	1.23221	0.236545	0.0728175	0.147694	0.152807	0.394492	0.506971	0.801498	0.597383	0.168492	0.367222	0.299796	3.01137e-52
snp_sb001001048695	T/C	10	6865997	1.5	1.13008	0.147719	0.0698413	0.0869161	0.0899273	0.141024	0.196452	0.380072	0.228512	0.844036	0.112604	0.106264	4.84154e-13
snp_sb001001048780	G/T	10	6910639	1.54167	1.12089	0.152106	0.0503968	0.0858976	0.0888737	0.266898	0.413292	0.72051	0.523631	0.227435	0.180446	0.164165	1.29124e-42
snp_sb001001049043	G/C	10	7041823	1.41667	1.07713	0.112956	0.030754	0.0617588	0.0638957	0.339424	0.502031	0.860828	0.72052	0.0969715	0.221355	0.196856	6.60212e-60
snp_sb001001049112	T/C	10	7171594	1.66667	1.15663	0.193143	0.0892857	0.110527	0.114353	0.156585	0.192183	0.660497	0.579727	0.181237	0.263313	0.228646	4.90988e-36
snp_sb001001049162	G/T	10	7201807	1.70833	1.25	0.260308	0.0722222	0.160342	0.165885	0.403976	0.549574	0.796319	0.547804	0.206367	0.35248	0.290359	3.23835e-51
snp_sb001001049235	G/C	10	7244584	1.20833	1.08823	0.0898273	0.0418651	0.056944	0.0589149	0.309026	0.264802	0.770447	0.687767	0.113495	0.182669	0.165985	2.30776e-48
snp_sb001001049424	A/T	10	7263360	1.45833	1.12214	0.143417	0.055754	0.0840736	0.08698	0.249118	0.336843	0.778081	0.66536	0.125737	0.251674	0.220004	2.93671e-49
snp_sb001001049425	T/G	10	7263479	1.20833	1.08823	0.0898273	0.0418651	0.056944	0.0589149	0.309026	0.264802	0.770447	0.687767	0.113495	0.182669	0.165985	2.30776e-48
snp_sb001001049696	A/G	10	7303004	1.20833	1.08823	0.0898273	0.0418651	0.056944	0.0589149	0.309026	0.264802	0.770447	0.687767	0.113495	0.182669	0.165985	2.30776e-48
snp_sb001001050017	C/T	10	7417528	1.58333	1.15638	0.189616	0.0696429	0.110833	0.114662	0.28228	0.371641	0.75106	0.603825	0.164027	0.280247	0.240978	5.23772e-46
snp_sb001001050142	G/T	10	7425177	1.58333	1.15638	0.189616	0.0696429	0.110833	0.114662	0.28228	0.371641	0.75106	0.603825	0.164027	0.280247	0.240978	5.23772e-46
snp_sb001001050233	G/A	10	7454437	1.58333	1.14965	0.183864	0.0696429	0.106574	0.110256	0.296371	0.346528	0.744262	0.608648	0.160747	0.272798	0.235589	3.26921e-45
snp_sb001001051116	C/G	10	7819374	1.33333	1.09712	0.112128	0.0416667	0.0665741	0.0688697	0.390866	0.374131	0.714218	0.543383	0.21008	0.14617	0.135487	1.02345e-41
snp_sb001001051390	A/G	10	7886796	1.25	1.05348	0.0721715	0.0251984	0.0408329	0.0422482	0.220581	0.382889	0.827367	0.720257	0.0970984	0.14617	0.135487	1.56984e-55
snp_sb001001051441	T/C	10	7917067	1.45833	1.13364	0.151985	0.0559524	0.0907124	0.0938545	0.256706	0.383189	0.749313	0.593576	0.171176	0.223431	0.19847	6.59887e-46
snp_sb001001051483	C/A	10	7939243	1.33333	1.07622	0.103595	0.022619	0.0589824	0.0610549	0.437084	0.616512	0.897019	0.731461	0.0917816	0.219797	0.195641	8.6092e-65
snp_sb001001051569	A/C	10	7967229	1.33333	1.12561	0.128078	0.0585317	0.0802773	0.0830528	0.246928	0.270881	0.735124	0.636718	0.142639	0.221355	0.196856	3.60704e-44
snp_sb001001052376	A/C	10	8252667	1.33333	1.11872	0.123016	0.0583333	0.0763889	0.079023	0.183834	0.236364	0.623871	0.50745	0.242659	0.155481	0.143394	3.11982e-32
snp_sb001001052384	G/A	10	8253014	1.33333	1.11179	0.118673	0.0583333	0.0728704	0.0753831	0.136382	0.199492	0.612298	0.51568	0.234797	0.150841	0.139464	4.14205e-31
snp_sb001001052399	G/A	10	8265181	1.45833	1.12646	0.146497	0.0501984	0.0868514	0.0898536	0.276468	0.422019	0.803251	0.659592	0.129022	0.255585	0.222923	2.22526e-52
snp_sb001001052461	G/A	10	8297212	1.54167	1.12312	0.16374	0.053373	0.0931571	0.0963898	0.281988	0.427065	0.834255	0.710708	0.101762	0.322332	0.270383	1.74874e-56
snp_sb001001052605	A/G	10	8390458	1.41667	1.10021	0.121079	0.0503968	0.0697865	0.072207	0.192038	0.277842	0.497737	0.304496	0.571029	0.100248	0.0952227	2.77936e-21
snp_sb001001052879	T/C	10	8476698	1.66667	1.19181	0.217008	0.0672619	0.129176	0.13365	0.311964	0.479299	0.754929	0.529344	0.222283	0.274672	0.23695	1.30889e-46
snp_sb001001053448	G/C	10	8696141	1.25	1.05348	0.0721715	0.0251984	0.0408329	0.0422482	0.220581	0.382889	0.871122	0.791159	0.0659921	0.195843	0.176666	2.55317e-61
snp_sb001001053500	G/T	10	8737429	1.625	1.19272	0.207454	0.0535714	0.125844	0.130235	0.331077	0.574302	0.874889	0.706104	0.104055	0.429556	0.337297	1.51176e-61
snp_sb001001053752	A/G	10	8828772	1.16667	1.02113	0.0346295	0.0194444	0.0176852	0.018295	-0.0643236	-0.0994764	0.800562	0.818606	0.0553971	0.097753	0.0929751	5.76823e-52
snp_sb001001053770	T/C	10	8832996	1.16667	1.06177	0.067464	0.0361111	0.0419444	0.0433908	0.152073	0.139073	0.725666	0.681351	0.116918	0.131971	0.123262	5.21367e-43
snp_sb001001053785	C/G	10	8851133	1.20833	1.04702	0.0629354	0.025	0.0358333	0.037069	0.19803	0.302326	0.82283	0.746056	0.0850955	0.141468	0.131461	8.56338e-55
snp_sb001001053818	C/G	10	8861926	1.45833	1.09771	0.122222	0.0335317	0.0687032	0.0710796	0.339636	0.511933	0.896326	0.787583	0.0674268	0.323989	0.271504	9.33449e-65
snp_sb001001054084	A/G	10	8975572	1.33333	1.10192	0.115584	0.0444444	0.0696296	0.0720307	0.253927	0.361702	0.804228	0.693291	0.110599	0.227559	0.201667	2.02751e-52
snp_sb001001054227	A/G	10	9046683	1.29167	1.13483	0.128966	0.0587302	0.082842	0.0857128	0.310705	0.291058	0.712506	0.594474	0.17054	0.204472	0.183567	1.08654e-41
snp_sb001001054331	C/T	10	9078799	1.45833	1.103	0.137811	0.0365079	0.0772865	0.0799656	0.451296	0.527628	0.884178	0.754807	0.0812105	0.315628	0.265818	3.81415e-63
snp_sb001001054734	T/A	10	9280539	1.25	1.05653	0.0762876	0.0224206	0.0433329	0.0448344	0.392995	0.482595	0.886584	0.780799	0.070185	0.198012	0.178408	1.8955e-63
snp_sb001001054766	G/C	10	9282679	1.375	1.08159	0.111541	0.0281746	0.0629346	0.0651189	0.343504	0.552319	0.873768	0.718031	0.0981746	0.223431	0.19847	8.9266e-62
snp_sb001001054778	A/C	10	9285094	1.75	1.32254	0.296844	0.0638889	0.190064	0.196632	0.445361	0.663856	0.871692	0.618294	0.154338	0.497765	0.37388	3.18131e-61
snp_sb001001054819	G/C	10	9299608	1.5	1.12068	0.152885	0.05	0.0881198	0.0911725	0.269604	0.432591	0.845466	0.72765	0.0935717	0.323989	0.271504	1.00271e-57
snp_sb001001055272	G/T	10	9494280	1.58333	1.25608	0.235956	0.055754	0.151583	0.15683	0.437228	0.632189	0.88844	0.696692	0.108839	0.49981	0.374905	1.34339e-63
snp_sb001001055388	T/C	10	9565092	1.54167	1.21161	0.206215	0.055754	0.129916	0.134417	0.392644	0.570847	0.887917	0.738827	0.0883741	0.497575	0.373785	1.57679e-63
snp_sb001001055389	C/T	10	9565346	1.54167	1.21161	0.206215	0.055754	0.129916	0.134417	0.392644	0.570847	0.887917	0.738827	0.0883741	0.497575	0.373785	1.57679e-63
snp_sb001001055650	C/A	10	9658886	1.66667	1.22241	0.230344	0.0724206	0.140287	0.145145	0.349591	0.483767	0.851328	0.712006	0.101121	0.487395	0.368618	1.52349e-58
snp_sb001001055709	T/C	10	9675857	1.375	1.07226	0.094071	0.0418651	0.0521292	0.053934	0.111084	0.196897	0.64328	0.555822	0.199784	0.117492	0.11059	2.7751e-34
snp_sb001001056186	C/A	10	9859654	1.70833	1.15511	0.19705	0.0640873	0.112314	0.116195	0.271191	0.429393	0.863889	0.761463	0.0783154	0.471307	0.360242	3.04563e-60
snp_sb001001056454	A/C	10	9969608	1.54167	1.19792	0.197217	0.0585317	0.122602	0.12685	0.331855	0.522586	0.879949	0.74854	0.0839834	0.487834	0.368843	1.98089e-62
snp_sb001001056482	T/A	10	9980493	1.54167	1.19792	0.197217	0.0585317	0.122602	0.12685	0.331855	0.522586	0.879949	0.74854	0.0839834	0.487834	0.368843	1.98089e-62
snp_sb001001056497	A/G	10	9986876	1.58333	1.22113	0.219853	0.0613095	0.137509	0.142271	0.36627	0.554142	0.87693	0.723971	0.0953176	0.498289	0.374143	5.24152e-62
snp_sb001001056820	G/C	10	10207324	1.29167	1.0779	0.090277	0.0111111	0.0523507	0.0541842	0.646245	0.787756	0.964964	0.834924	0.0494284	0.318653	0.267883	2.97902e-74
snp_sb001001058403	G/T	10	10802334	1.54167	1.24038	0.23273	0.0613095	0.148673	0.15385	0.502482	0.587622	0.818357	0.559523	0.196809	0.336962	0.28019	3.39098e-54
snp_sb001001059231	C/T	10	11379510	1.79167	1.4362	0.376801	0.397619	0.249324	0.257935	-0.391179	-0.594792	0.162514	0.474862	0.276469	0.475171	0.362277	0.00218355
snp_sb001001059382	C/T	10	11461369	1.41667	1.15218	0.155257	0.0446429	0.0962958	0.0996237	0.310035	0.536399	0.841466	0.658037	0.129918	0.28209	0.242302	2.68283e-57
snp_sb001001061143	G/T	10	12290721	1.375	1.07212	0.0960115	0.0472222	0.0532407	0.0550766	0.114271	0.113043	0.653758	0.609629	0.160085	0.136735	0.127386	3.13151e-35
snp_sb001001062896	A/C	10	12994937	1.16667	1.06755	0.0686058	0.0305556	0.0432407	0.0447318	0.165262	0.293362	0.828121	0.756766	0.0803533	0.178215	0.162335	1.77991e-55
snp_sb001001062905	G/A	10	13006327	1.66667	1.20427	0.227198	0.0642857	0.136175	0.140885	0.313471	0.52792	0.825388	0.630122	0.146749	0.368654	0.300701	3.09422e-55
snp_sb001001064727	A/C	10	13577253	1.95833	1.72598	0.554658	0.676786	0.385769	0.399117	-0.613226	-0.754383	-0.355728	0.227234	0.850189	0.49924	0.37462	1.5636e-11
snp_sb001001065556	C/T	10	13911860	1.70833	1.20922	0.236646	0.0585317	0.14149	0.14639	0.339934	0.58632	0.859594	0.660592	0.128448	0.417304	0.330232	1.13701e-59
snp_sb001001066189	G/A	10	14137762	1.625	1.19606	0.216178	0.0613095	0.130555	0.135064	0.365088	0.530393	0.84628	0.672662	0.121657	0.399438	0.319663	6.66975e-58
snp_sb001001066654	C/G	10	14634138	1.375	1.17571	0.161436	0.0416667	0.104352	0.10795	0.413591	0.60071	0.85834	0.645221	0.137464	0.294772	0.251327	1.84869e-59
snp_sb001001067710	A/C	10	15183661	1.75	1.2227	0.244996	0.0837302	0.146824	0.151901	0.200759	0.429722	0.815344	0.6762	0.119713	0.453907	0.350891	6.55586e-54
snp_sb001001068022	C/A	10	15305891	1.79167	1.23081	0.261689	0.080754	0.15612	0.161524	0.29832	0.482745	0.838435	0.687649	0.113558	0.49986	0.37493	8.00919e-57
snp_sb001001068594	G/C	10	15440470	1.5	1.07008	0.112233	0.0365079	0.0582124	0.0602338	0.166658	0.372849	0.723367	0.558905	0.197303	0.132653	0.123855	9.12643e-43
snp_sb001001069579	T/C	10	15785279	1.625	1.22421	0.228784	0.0724206	0.141481	0.146367	0.308003	0.488125	0.834225	0.676142	0.119745	0.437427	0.341756	2.64415e-56
snp_sb001001069987	C/T	10	15908110	1.54167	1.19063	0.201064	0.0640873	0.12324	0.127497	0.33136	0.479981	0.851591	0.714608	0.0998419	0.432403	0.338917	1.33598e-58
snp_sb001001070653	A/G	10	16102855	1.54167	1.15338	0.179183	0.055754	0.105185	0.108819	0.359837	0.469942	0.875591	0.765291	0.0766729	0.448693	0.34803	7.6029e-62
snp_sb001001072242	A/T	10	16881690	1.5	1.14583	0.165275	0.0420635	0.0989531	0.102379	0.324561	0.574915	0.74442	0.398755	0.376951	0.164667	0.15111	2.16493e-45
snp_sb001001072667	G/C	10	17330642	1.33333	1.11383	0.115419	0.0333333	0.0707407	0.0731801	0.330912	0.528796	0.805125	0.586431	0.176308	0.171476	0.156774	1.55185e-52
snp_sb001001074535	G/A	10	18068919	1.625	1.08456	0.138547	0.0446429	0.0711106	0.0735701	0.226096	0.372206	0.827641	0.725453	0.0946121	0.259464	0.225803	1.6965e-55
snp_sb001001074635	T/C	10	18099482	1.375	1.11072	0.122845	0.030754	0.0734255	0.0759647	0.391095	0.581154	0.774786	0.462298	0.290777	0.136735	0.127386	6.31184e-49
snp_sb001001075224	C/G	10	18283672	1.33333	1.07516	0.100718	0.0333333	0.0572222	0.0591954	0.279838	0.417476	0.883092	0.799307	0.0627709	0.285752	0.244925	7.80336e-63
snp_sb001001076324	G/T	10	18669974	1.54167	1.1174	0.168726	0.0555556	0.0938605	0.0971112	0.416135	0.408105	0.867775	0.776607	0.0719132	0.420667	0.332187	1.02164e-60
snp_sb001001076329	T/G	10	18670201	1.54167	1.12062	0.172066	0.0583333	0.0961754	0.0995059	0.387645	0.393469	0.861528	0.771699	0.0739607	0.421773	0.332827	7.17346e-60
snp_sb001001081206	T/A	10	20162074	1.54167	1.09878	0.144469	0.0446429	0.0787032	0.0814245	0.26029	0.43277	0.813476	0.671167	0.122486	0.239756	0.211015	1.1084e-53
snp_sb001001106121	C/T	10	35503319	2	1.9779	0.685974	0.961111	0.493148	0.510206	-0.94099	-0.94893	-0.925134	0.0122098	20.2253	0.49924	0.37462	9.23769e-69
snp_sb001001123603	C/G	10	41744649	1.5	1.12572	0.161255	0.0446429	0.0927773	0.0959839	0.364421	0.518817	0.825025	0.636365	0.142856	0.255585	0.222923	3.69035e-55
snp_sb001001123610	G/T	10	41745708	1.5	1.12234	0.158439	0.0418651	0.0906477	0.0937808	0.367982	0.538156	0.837151	0.647394	0.136164	0.257528	0.224368	9.71782e-57
snp_sb001001125741	A/G	10	42872791	1.625	1.10762	0.160392	0.0585317	0.0865736	0.0895662	0.203715	0.323908	0.805752	0.71269	0.100784	0.301848	0.256292	1.11443e-52
snp_sb001001126467	T/C	10	43270327	1.54167	1.05328	0.0979964	0.0279762	0.0470366	0.0486658	0.204048	0.405225	0.775502	0.622549	0.151575	0.124766	0.116983	5.0033e-49
snp_sb001001126760	T/C	10	43371867	1.625	1.16606	0.188706	0.047619	0.110805	0.11464	0.298666	0.570245	0.850522	0.652179	0.133331	0.318996	0.268117	1.45657e-58
snp_sb001001128018	A/G	10	44035541	1.45833	1.19817	0.18938	0.055754	0.120555	0.124719	0.40833	0.537523	0.787889	0.541359	0.211801	0.263313	0.228646	1.85021e-50
snp_sb001001128319	C/G	10	44208834	1.66667	1.23771	0.247744	0.0751984	0.15287	0.158149	0.361617	0.508089	0.775394	0.543401	0.210065	0.335368	0.279132	6.61872e-49
snp_sb001001129052	G/C	10	44512210	1.54167	1.21471	0.226574	0.0361111	0.14099	0.145866	0.683547	0.743875	0.89697	0.597735	0.168245	0.350963	0.289376	9.3563e-65
snp_sb001001132941	A/C	10	45935818	1.33333	1.19712	0.168862	0.0388889	0.112407	0.116284	0.634513	0.654036	0.822222	0.486138	0.264258	0.219272	0.195232	1.0345e-54
snp_sb001001135620	G/T	10	47253248	1.16667	1.05906	0.0594047	0.0222222	0.0362963	0.0375479	0.53125	0.387755	0.82806	0.719164	0.0976258	0.129577	0.121182	1.80394e-55
snp_sb001001135862	A/C	10	47360920	1.29167	1.10985	0.107757	0.0446429	0.0677773	0.0701218	0.238793	0.34133	0.708108	0.556846	0.198957	0.153165	0.141435	3.8241e-41
snp_sb001001135863	G/T	10	47361064	1.29167	1.10985	0.107757	0.0446429	0.0677773	0.0701218	0.238793	0.34133	0.708108	0.556846	0.198957	0.153165	0.141435	3.8241e-41
snp_sb001001135880	T/C	10	47362269	1.29167	1.10985	0.107757	0.0446429	0.0677773	0.0701218	0.238793	0.34133	0.708108	0.556846	0.198957	0.153165	0.141435	3.8241e-41
snp_sb001001136699	G/C	10	47630649	1.33333	1.12237	0.124118	0.0446429	0.0774069	0.0800835	0.333944	0.423271	0.787926	0.632281	0.145394	0.210861	0.18863	1.7421e-50
snp_sb001001136963	T/G	10	47735709	1.54167	1.17126	0.184817	0.0613095	0.111481	0.115333	0.276922	0.450045	0.84628	0.720486	0.0969878	0.399438	0.319663	6.66975e-58
snp_sb001001137169	T/C	10	47884013	1.41667	1.11945	0.130761	0.0361111	0.0776852	0.080364	0.357677	0.535161	0.791625	0.551726	0.203123	0.17373	0.158639	7.56819e-51
snp_sb001001137170	T/G	10	47884994	1.29167	1.06262	0.0857167	0.0279762	0.0483329	0.0500068	0.279016	0.421177	0.861497	0.760716	0.0786377	0.202326	0.181858	5.23264e-60
snp_sb001001138067	G/A	10	48401991	1.375	1.09547	0.120231	0.0390873	0.0699995	0.0724206	0.257935	0.441606	0.8468	0.725641	0.0945228	0.255585	0.222923	5.16383e-58
snp_sb001001138488	C/G	10	48651628	1.5	1.09696	0.136361	0.0422619	0.0753793	0.077999	0.271877	0.439344	0.868759	0.765916	0.0764066	0.322332	0.270383	4.2424e-61
snp_sb001001139100	G/A	10	48953732	1.45833	1.15363	0.158172	0.0444444	0.0972222	0.100575	0.323796	0.542857	0.889904	0.759165	0.0793091	0.404373	0.322614	9.00908e-64
snp_sb001001139277	G/C	10	49050867	1.54167	1.19223	0.211723	0.0757937	0.129849	0.134384	0.346728	0.416293	0.848413	0.740302	0.0876999	0.499996	0.374998	4.3548e-58
snp_sb001001139413	G/C	10	49107208	1.45833	1.19963	0.182153	0.0390873	0.117407	0.121463	0.389378	0.667078	0.857446	0.571808	0.18721	0.274672	0.23695	1.98585e-59
snp_sb001001140427	G/C	10	49455538	1.33333	1.07543	0.10115	0.0279762	0.0575921	0.0595854	0.385436	0.514236	0.827455	0.644797	0.137719	0.162382	0.149198	1.58399e-55
snp_sb001001140645	A/G	10	49525918	1.375	1.20529	0.183753	0.0472222	0.121019	0.125192	0.451402	0.609793	0.870655	0.668523	0.123959	0.365783	0.298885	4.025e-61
snp_sb001001140900	T/G	10	49710648	1.29167	1.138	0.125553	0.0277778	0.0812963	0.0840996	0.404906	0.658314	0.856219	0.5792	0.18163	0.193667	0.174914	3.51933e-59
snp_sb001001141575	T/C	10	50275184	1.625	1.21442	0.230904	0.0501984	0.140555	0.145409	0.47162	0.642856	0.893538	0.701907	0.106173	0.47197	0.360592	2.50695e-64
snp_sb001001141732	G/A	10	50371512	1.29167	1.11666	0.117189	0.0472222	0.0734259	0.0759579	0.451865	0.356873	0.773228	0.647392	0.136165	0.208739	0.186953	1.36747e-48
snp_sb001001141738	G/A	10	50372889	1.29167	1.14881	0.132433	0.0777778	0.0866667	0.0896552	0.275184	0.102564	0.578278	0.530081	0.221626	0.184884	0.167793	6.33993e-28
snp_sb001001142615	C/T	10	50882290	1.625	1.2668	0.253595	0.0696429	0.161305	0.166888	0.476108	0.568254	0.846144	0.643641	0.138415	0.453057	0.350427	7.28156e-58
snp_sb001001142846	A/G	10	51010408	1.125	1.04557	0.0479035	0.0222222	0.0298148	0.0308429	0.284802	0.254658	0.821429	0.760417	0.0787671	0.124766	0.116983	1.29509e-54
snp_sb001001142889	A/T	10	51041858	1.5	1.20446	0.191928	0.0611111	0.122194	0.126422	0.30305	0.499884	0.846812	0.693695	0.110389	0.399438	0.319663	6.66975e-58
snp_sb001001142978	G/C	10	51082196	1.375	1.10079	0.130135	0.0277778	0.0757407	0.0783525	0.527364	0.633252	0.902576	0.734358	0.0904334	0.286383	0.245375	2.26269e-65
snp_sb001001143043	T/C	10	51087166	1.16667	1.06159	0.0666769	0.025	0.0413889	0.0428161	0.403602	0.395973	0.862802	0.772861	0.0734734	0.182669	0.165985	4.5733e-60
snp_sb001001143260	C/T	10	51187087	1.83333	1.38902	0.36902	0.331151	0.237972	0.246198	-0.268397	-0.391554	0.327287	0.516574	0.233957	0.492489	0.371216	5.84446e-10
snp_sb001001143265	G/T	10	51187547	1.70833	1.28702	0.27783	0.0753968	0.175482	0.181559	0.43856	0.570344	0.846559	0.642875	0.138878	0.491062	0.370491	6.15537e-58
snp_sb001001143369	C/G	10	51343698	1.70833	1.23075	0.242553	0.0640873	0.148055	0.153168	0.37695	0.567139	0.871817	0.70387	0.105179	0.499984	0.374992	2.65887e-61
snp_sb001001143447	T/G	10	51426359	1.375	1.12852	0.128124	0.0444444	0.0794444	0.0821839	0.261923	0.440559	0.814194	0.667871	0.124324	0.239756	0.211015	1.1084e-53
snp_sb001001143490	A/T	10	51455048	1.45833	1.1695	0.172222	0.0583333	0.107286	0.111	0.33462	0.456284	0.827463	0.682671	0.116209	0.338549	0.281241	2.29563e-55
snp_sb001001143493	T/C	10	51473805	1.25	1.09231	0.0955903	0.0361111	0.0591667	0.0612069	0.231647	0.389671	0.845113	0.746223	0.0850205	0.233692	0.206386	1.06517e-57
snp_sb001001143514	T/G	10	51497438	1.33333	1.1169	0.122036	0.0305556	0.0747222	0.0772989	0.33255	0.591078	0.836279	0.599628	0.166925	0.187091	0.16959	1.54118e-56
snp_sb001001143617	G/T	10	51630776	1.58333	1.25464	0.242148	0.080754	0.154453	0.1598	0.316337	0.477163	0.820914	0.657473	0.130244	0.451335	0.349483	1.44631e-54
snp_sb001001143695	G/A	10	51701021	1.66667	1.19337	0.222439	0.072619	0.132056	0.136636	0.313807	0.450089	0.848406	0.72433	0.0951466	0.479326	0.364449	3.27859e-58
snp_sb001001143861	G/C	10	51777211	1.70833	1.22068	0.233871	0.0696429	0.141574	0.146463	0.352645	0.50808	0.791988	0.577142	0.183169	0.335368	0.279132	6.03949e-51
snp_sb001001144282	A/T	10	51932794	1.41667	1.14065	0.145023	0.0361111	0.0891667	0.0922414	0.442556	0.595016	0.865469	0.667812	0.124357	0.269027	0.232839	2.011e-60
snp_sb001001144553	A/G	10	52051815	1.375	1.08919	0.11315	0.0392857	0.065342	0.0676093	0.253602	0.398768	0.809676	0.683444	0.115795	0.206609	0.185266	2.56112e-53
snp_sb001001145881	T/C	10	52404984	2	1.97758	0.686473	0.955556	0.493519	0.510705	-0.930082	-0.93621	-0.911111	0.012963	19.0357	0.5	0.375	2.61782e-66
snp_sb001001146387	T/A	10	52577265	1.54167	1.12358	0.15895	0.0474206	0.0908329	0.0939724	0.365962	0.477935	0.806701	0.629742	0.146988	0.24575	0.215553	8.08969e-53
snp_sb001001146615	G/A	10	52827509	1.625	1.13813	0.177974	0.0503968	0.100712	0.104199	0.256094	0.499597	0.867616	0.735446	0.0899297	0.381189	0.308536	7.71165e-61
snp_sb001001146679	A/C	10	52840309	1.625	1.13484	0.173672	0.0474206	0.0980551	0.101444	0.258753	0.516388	0.874955	0.741436	0.0871835	0.379827	0.307693	8.93162e-62
snp_sb001001146774	C/T	10	52878053	1.625	1.19281	0.222479	0.072619	0.133908	0.138551	0.320231	0.457694	0.854485	0.731673	0.0916826	0.499127	0.374563	5.20595e-59
snp_sb001001146959	T/G	10	52964778	1.625	1.13148	0.18021	0.0559524	0.100898	0.104391	0.286724	0.445454	0.793211	0.627103	0.148659	0.270917	0.234219	3.39839e-51
snp_sb001001147068	C/T	10	53000240	1.79167	1.27985	0.292816	0.072619	0.180898	0.18715	0.400664	0.598563	0.810585	0.528158	0.223343	0.383889	0.310204	2.49345e-53
snp_sb001001147185	C/T	10	53070739	1.58333	1.24035	0.231454	0.05	0.147593	0.152682	0.456178	0.66123	0.866667	0.60642	0.162256	0.375695	0.305122	1.40681e-60
snp_sb001001147540	C/T	10	53205484	1.66667	1.25551	0.252187	0.0390873	0.157962	0.163417	0.519471	0.752553	0.908827	0.631546	0.145854	0.429295	0.337148	1.69118e-66
snp_sb001001147581	G/A	10	53230980	1.66667	1.28255	0.277177	0.0611111	0.175244	0.181336	0.473625	0.651279	0.874603	0.640407	0.140377	0.487395	0.368618	1.24763e-61
snp_sb001001148504	T/A	10	53526285	1.54167	1.2721	0.248144	0.0444444	0.161704	0.167333	0.536998	0.72515	0.906139	0.658501	0.12965	0.473274	0.36128	5.02267e-66
snp_sb001001148920	A/C	10	53704688	1.5	1.25793	0.243271	0.0529762	0.158425	0.163896	0.583517	0.665608	0.824189	0.474237	0.277162	0.301848	0.256292	4.90714e-55
snp_sb001001149014	A/G	10	53839970	1.66667	1.28932	0.284812	0.0700397	0.180935	0.187194	0.484285	0.612901	0.826087	0.550727	0.203946	0.403151	0.321886	2.26163e-55
snp_sb001001149022	A/T	10	53840404	1.66667	1.28932	0.284812	0.0700397	0.180935	0.187194	0.484285	0.612901	0.826087	0.550727	0.203946	0.403151	0.321886	2.26163e-55
snp_sb001001149492	A/G	10	54145327	1.54167	1.13028	0.167566	0.053373	0.0966756	0.10003	0.253823	0.447917	0.738925	0.527109	0.224285	0.204472	0.183567	8.49924e-45
snp_sb001001149670	A/G	10	54204906	1.08333	1.02855	0.0351348	0.0138889	0.0212037	0.0219349	0.303077	0.344978	0.894487	0.838917	0.0480034	0.131971	0.123262	2.00187e-64
snp_sb001001149703	T/C	10	54233635	1.125	1.03447	0.0453402	0.0138889	0.0263889	0.0272989	0.535385	0.473684	0.898164	0.806512	0.0599769	0.136735	0.127386	6.10689e-65
snp_sb001001150146	C/G	10	54629603	1.625	1.2202	0.233026	0.0698413	0.143396	0.148384	0.352409	0.512947	0.853878	0.699988	0.107149	0.477592	0.363545	6.47895e-59
snp_sb001001150171	T/C	10	54642783	1.58333	1.19892	0.211702	0.0640873	0.129246	0.133755	0.341182	0.504143	0.832797	0.6628	0.127188	0.382543	0.309373	4.6924e-56
snp_sb001001150225	T/C	10	54729038	1.66667	1.28803	0.272249	0.0642857	0.174225	0.180282	0.438922	0.63102	0.865144	0.634518	0.144	0.476397	0.36292	1.937e-60
snp_sb001001151154	T/C	10	55347399	1.625	1.18839	0.208604	0.0531746	0.125667	0.130026	0.320614	0.576861	0.768458	0.452799	0.302122	0.229611	0.20325	3.76575e-48
snp_sb001001151316	G/C	10	55426696	1.33333	1.07711	0.0958771	0.0281746	0.0552041	0.0571337	0.226072	0.489628	0.705638	0.423239	0.340683	0.0952507	0.0907143	5.55129e-41
snp_sb001001151401	A/G	10	55478741	1.625	1.27879	0.26853	0.0779762	0.171583	0.17752	0.42628	0.545548	0.784023	0.524752	0.226415	0.361419	0.296107	6.13238e-50
snp_sb001001151403	A/T	10	55479226	1.625	1.27879	0.26853	0.0779762	0.171583	0.17752	0.42628	0.545548	0.784023	0.524752	0.226415	0.361419	0.296107	6.13238e-50
snp_sb001001152013	A/G	10	55748738	1.625	1.19202	0.207115	0.0670635	0.124278	0.12859	0.325233	0.460376	0.847245	0.716924	0.098712	0.439382	0.342854	4.5288e-58
snp_sb001001152071	A/G	10	55761184	1.20833	1.03638	0.0564068	0.00555556	0.0301852	0.0312261	0.719029	0.815951	0.949431	0.725242	0.0947124	0.110148	0.104082	2.37667e-72
snp_sb001001152256	T/C	10	55828810	1.58333	1.2777	0.259264	0.0615079	0.167056	0.172843	0.577357	0.631812	0.871601	0.651267	0.133867	0.479326	0.364449	2.42832e-61
snp_sb001001152295	G/A	10	55831411	1.33333	1.09849	0.110327	0.030754	0.0661201	0.0684205	0.431236	0.534877	0.68628	0.325512	0.518021	0.097753	0.0929751	1.09806e-38
snp_sb001001152555	T/C	10	55948696	1.5	1.17457	0.187843	0.0472222	0.114879	0.118855	0.481483	0.58894	0.892642	0.738826	0.0883748	0.440348	0.343395	3.81271e-64
snp_sb001001152919	T/G	10	56091865	1.54167	1.13406	0.153239	0.0305556	0.0891667	0.0922414	0.408803	0.657321	0.919407	0.764814	0.076877	0.379827	0.307693	5.93932e-68
snp_sb001001153023	T/C	10	56145541	1.5	1.13841	0.159517	0.0333333	0.0938889	0.0971264	0.419351	0.64497	0.922235	0.780962	0.070118	0.429295	0.337148	2.34127e-68
snp_sb001001153579	C/T	10	56467077	1.5	1.20084	0.190459	0.0388889	0.120926	0.125096	0.47761	0.678407	0.875862	0.61399	0.157173	0.313933	0.264656	7.74857e-62
snp_sb001001153639	C/T	10	56475443	2	1.96883	0.68154	0.961111	0.489259	0.506183	-0.949123	-0.964421	-0.925134	0.0199994	12.2504	0.49924	0.37462	9.23769e-69
snp_sb001001153713	T/G	10	56497727	1.08333	1.07147	0.0542412	0.025	0.0382407	0.0395594	0.384921	0.346247	0.74358	0.607772	0.161339	0.097753	0.0929751	4.49563e-45
snp_sb001001153754	G/C	10	56502179	1.125	1.07434	0.0603305	0.0277778	0.0409259	0.0423372	0.24512	0.321267	0.722179	0.590678	0.173243	0.100248	0.0952227	1.29124e-42
snp_sb001001153777	G/T	10	56504177	1.16667	1.08349	0.0738756	0.0361111	0.0484259	0.0500958	0.156062	0.254302	0.663781	0.549122	0.205272	0.107685	0.101887	2.86941e-36
snp_sb001001153830	T/C	10	56514984	1.66667	1.28877	0.273703	0.075	0.174694	0.180732	0.488952	0.570678	0.833652	0.612533	0.158141	0.451335	0.349483	3.64679e-56
snp_sb001001153944	A/T	10	56584584	1.375	1.14068	0.143573	0.0416667	0.0891667	0.0922414	0.40915	0.53271	0.776744	0.522233	0.228714	0.187091	0.16959	5.10157e-49
snp_sb001001154375	T/G	10	56953779	1.58333	1.14939	0.190406	0.053373	0.110187	0.114017	0.436789	0.515612	0.855149	0.700961	0.106653	0.368654	0.300701	3.24009e-59
snp_sb001001154376	A/G	10	56954635	1.58333	1.14939	0.190406	0.053373	0.110187	0.114017	0.436789	0.515612	0.855149	0.700961	0.106653	0.368654	0.300701	3.24009e-59
snp_sb001001154491	A/G	10	57048118	1.41667	1.07457	0.110573	0.0281746	0.0598337	0.061923	0.379999	0.529118	0.863706	0.710556	0.101837	0.206609	0.185266	2.15254e-60
snp_sb001001154727	A/T	10	57209384	1.375	1.11971	0.121819	0.0585317	0.0741662	0.076731	0.168585	0.210803	0.793487	0.738326	0.088604	0.283925	0.243618	3.79931e-51
snp_sb001001154814	A/G	10	57236503	1.375	1.12079	0.122098	0.0613095	0.074444	0.0770183	0.155522	0.176434	0.72513	0.666244	0.125238	0.223431	0.19847	5.05501e-43
snp_sb001001154846	G/A	10	57256731	1.58333	1.15862	0.180567	0.0753968	0.106223	0.109912	0.237915	0.2902	0.70719	0.587475	0.17555	0.257528	0.224368	5.01311e-41
snp_sb001001155006	A/G	10	57346816	1.5	1.13392	0.1623	0.0333333	0.095342	0.0986438	0.451226	0.650382	0.919806	0.770623	0.0744127	0.416167	0.329569	5.28778e-68
snp_sb001001155138	G/A	10	57407029	1.70833	1.24384	0.265089	0.0837302	0.162549	0.16819	0.392221	0.484893	0.805806	0.623003	0.151282	0.431375	0.338333	1.09097e-52
snp_sb001001155151	G/C	10	57417148	1.5	1.15257	0.170361	0.0611111	0.102222	0.105747	0.278136	0.402174	0.760349	0.599129	0.167273	0.255585	0.222923	4.86106e-47
snp_sb001001155387	C/T	10	57594003	1.33333	1.1079	0.133018	0.0333333	0.0796296	0.0823755	0.49966	0.581395	0.89794	0.75619	0.0806048	0.327279	0.273723	6.67569e-65
snp_sb001001155922	A/C	10	57999258	1.58333	1.09282	0.14031	0.0448413	0.0748337	0.0774402	0.231618	0.400788	0.836698	0.727473	0.0936554	0.274672	0.23695	9.76095e-57
snp_sb001001155952	G/A	10	58013741	1.58333	1.08917	0.13741	0.0418651	0.0726016	0.0751254	0.246618	0.423358	0.846417	0.733659	0.0907576	0.272798	0.235589	6.16994e-58
snp_sb001001156095	A/G	10	58139340	1.29167	1.16411	0.141041	0.122222	0.0935185	0.0967433	-0.086759	-0.306931	0.35273	0.50474	0.245304	0.189291	0.171375	2.40184e-11
snp_sb001001156161	A/C	8	58169028	1.375	1.09028	0.114906	0.0335317	0.0664583	0.0687899	0.321218	0.495447	0.722476	0.44996	0.305604	0.119925	0.112734	1.61666e-42
snp_sb001001156569	A/G	10	58437121	1.54167	1.16987	0.187997	0.0753968	0.113114	0.117063	0.242609	0.333445	0.84651	0.769727	0.0747907	0.491062	0.370491	6.15537e-58
snp_sb001001156571	T/C	10	58437429	1.54167	1.16987	0.187997	0.0753968	0.113114	0.117063	0.242609	0.333445	0.84651	0.769727	0.0747907	0.491062	0.370491	6.15537e-58
snp_sb001001156596	G/T	10	58484122	1.45833	1.13974	0.149614	0.0724206	0.0901016	0.0932289	0.278167	0.196233	0.479945	0.352978	0.45826	0.139105	0.12943	1.06001e-19
snp_sb001001157023	T/C	10	58764939	1.41667	1.14986	0.157785	0.0388889	0.0972222	0.100575	0.395464	0.6	0.893899	0.734748	0.0902527	0.367222	0.299796	2.47574e-64
snp_sb001001157649	G/A	10	59326239	1.5	1.25055	0.22791	0.0809524	0.148568	0.153727	0.447711	0.455114	0.814425	0.659424	0.129119	0.436437	0.341199	8.76205e-54
snp_sb001001157973	C/T	10	59548442	1.58333	1.17187	0.190494	0.0446429	0.114074	0.118015	0.342334	0.608649	0.892534	0.725397	0.094639	0.41387	0.328226	4.00034e-64
snp_sb001001158346	G/A	10	59732873	1.375	1.10602	0.132741	0.0365079	0.0783825	0.0811211	0.457706	0.534233	0.843992	0.665051	0.125911	0.233692	0.206386	1.06517e-57
snp_sb001001158827	G/T	10	60266127	1.625	1.29727	0.267972	0.0801129	0.173858	0.180019	0.531842	0.539205	0.720424	0.393275	0.385688	0.283345	0.243203	1.6576e-42
snp_sb001001158829	G/A	10	60266601	1.625	1.29727	0.267972	0.0801129	0.173858	0.180019	0.531842	0.539205	0.720424	0.393275	0.385688	0.283345	0.243203	1.6576e-42
snp_sb001001158833	T/A	10	60267088	1.66667	1.27492	0.261311	0.0854701	0.165342	0.171173	0.479227	0.483071	0.735454	0.488235	0.262049	0.318653	0.267883	5.37914e-44
snp_sb001001158975	G/A	10	60358852	1.41667	1.17058	0.174757	0.0305556	0.109907	0.113697	0.590705	0.721988	0.925417	0.731729	0.0916567	0.410367	0.326166	8.08365e-69
snp_sb001001159178	T/C	10	60555756	1.45833	1.07358	0.114501	0.055754	0.0606571	0.0627691	0.0836913	0.080834	0.535899	0.495084	0.254964	0.119925	0.112734	3.47234e-24
snp_sb001001159269	T/C	10	60632822	1.58333	1.21362	0.223971	0.072619	0.138105	0.142903	0.377355	0.474174	0.726702	0.48025	0.270562	0.263313	0.228646	6.18859e-43
snp_sb001001159310	T/C	10	60654199	1.29167	1.08432	0.096043	0.0446429	0.056583	0.0585546	0.257282	0.211021	0.668136	0.579375	0.181499	0.134356	0.125331	9.58162e-37
snp_sb001001159524	G/C	10	60794746	1.54167	1.14793	0.172089	0.0474206	0.101653	0.105211	0.365074	0.533505	0.829367	0.634223	0.144183	0.276538	0.238301	1.44705e-55
snp_sb001001159668	A/G	10	60840808	1.58333	1.07855	0.129827	0.05	0.0664531	0.0687587	0.172449	0.24759	0.833164	0.778265	0.0712275	0.300091	0.255064	4.16664e-56
snp_sb001001159669	T/G	10	60841415	1.58333	1.23088	0.224264	0.0555556	0.141268	0.146153	0.457345	0.606736	0.87957	0.693767	0.110351	0.460425	0.354429	2.79663e-62
snp_sb001001159706	A/C	10	60872627	1.41667	1.10217	0.12498	0.0666667	0.0716383	0.0741227	0.148014	0.0693994	0.734793	0.715015	0.0996431	0.251674	0.220004	5.18576e-44
snp_sb001001159813	G/A	10	60977250	1.70833	1.32345	0.294321	0.0835317	0.189894	0.196495	0.427876	0.560113	0.752684	0.437774	0.321071	0.336962	0.28019	4.5848e-46
snp_sb001001159909	G/C	10	61048475	1.33333	1.08342	0.097374	0.0611111	0.0562963	0.0582375	-0.013726	-0.0855263	0.676365	0.701863	0.106195	0.189291	0.171375	1.3819e-37
snp_sb001001159934	T/A	10	61069500	1.33333	1.12846	0.126565	0.0279762	0.0797085	0.08251	0.363275	0.649019	0.834415	0.528223	0.223285	0.166945	0.153009	3.8912e-56
snp_sb001001159963	C/G	10	61082484	1.41667	1.07137	0.0977899	0.0472222	0.0526852	0.0545019	0.148473	0.103691	0.782047	0.756833	0.0803237	0.217181	0.193597	1.15355e-49
snp_sb001001160062	T/C	10	61144250	1.41667	1.17065	0.171729	0.0529762	0.10832	0.112108	0.343647	0.510927	0.732017	0.45206	0.303024	0.195843	0.176666	1.75241e-43
snp_sb001001160063	T/C	10	61145074	1.33333	1.10936	0.109055	0.0777778	0.0666667	0.0689655	-0.0431063	-0.166667	0.545291	0.610249	0.159669	0.171476	0.156774	5.19509e-25
snp_sb001001160146	A/T	10	61206699	1.33333	1.12846	0.126565	0.0279762	0.0797085	0.08251	0.363275	0.649019	0.834415	0.528223	0.223285	0.166945	0.153009	3.8912e-56
snp_sb040057635750	G/C	1	9985873	1.375	1.07594	0.0924666	0.0251984	0.0517588	0.0535509	0.212674	0.513157	0.801618	0.592513	0.171932	0.127175	0.119089	2.93137e-52
snp_sb042060170244	T/C	1	80269	1.33333	1.16133	0.143633	0.0416667	0.0937963	0.0970307	0.387908	0.555775	0.848991	0.660062	0.128752	0.276538	0.238301	3.27647e-58
snp_sb042060170277	C/G	1	121304	1.33333	1.16133	0.143633	0.0416667	0.0937963	0.0970307	0.387908	0.555775	0.848991	0.660062	0.128752	0.276538	0.238301	3.27647e-58
snp_sb042060170365	C/A	1	164858	1.20833	1.06407	0.068555	0.0305556	0.0410185	0.042433	0.314698	0.255079	0.832314	0.774894	0.0726249	0.182669	0.165985	5.07751e-56
snp_sb042060170527	T/C	1	253699	1.5	1.21197	0.20586	0.0501984	0.131213	0.135758	0.512245	0.617427	0.894629	0.724574	0.0950304	0.475788	0.362601	1.90503e-64
snp_sb042060170640	G/C	1	301154	1.625	1.25118	0.250297	0.0698413	0.157101	0.162533	0.476522	0.555438	0.856208	0.676554	0.119519	0.486034	0.367919	2.96787e-59
snp_sb042060170723	G/C	1	360316	1.70833	1.26381	0.271437	0.0698413	0.168398	0.174219	0.433332	0.58526	0.838294	0.610102	0.159767	0.432403	0.338917	6.76943e-57
snp_sb042060170819	T/C	1	417535	1.45833	1.09428	0.125321	0.0279762	0.0701847	0.0726122	0.39229	0.601392	0.817081	0.541106	0.212017	0.153165	0.141435	3.39098e-54
snp_sb042060171868	A/G	1	1203876	1.45833	1.23017	0.215596	0.0277778	0.140741	0.145594	0.720412	0.802632	0.941404	0.703115	0.10556	0.474546	0.361949	3.77255e-71
snp_sb042060172246	C/T	1	1302330	1.20833	1.05414	0.0624507	0.0194444	0.0365741	0.0378352	0.392133	0.468354	0.902626	0.816843	0.0560562	0.200173	0.180138	1.4423e-65
snp_sb042060173087	G/T	1	1647523	1.08333	1.04417	0.0348778	0.0194444	0.0234259	0.0242337	0.0809729	0.16996	0.840663	0.808036	0.059392	0.122349	0.114865	4.07083e-57
snp_sb042060173189	A/C	1	1779703	1.66667	1.2502	0.247422	0.0529762	0.155462	0.160831	0.473512	0.659235	0.892912	0.685743	0.114568	0.494398	0.372183	3.2588e-64
snp_sb042060173295	C/T	1	1971773	1.29167	1.06283	0.0817928	0.0166667	0.0459259	0.0475096	0.475786	0.637097	0.909631	0.750983	0.0828969	0.184884	0.167793	1.46312e-66
snp_sb042060173350	T/C	1	2036942	1.33333	1.04183	0.072189	0.0279762	0.0362958	0.0375547	0.204662	0.229217	0.756575	0.684184	0.115399	0.115052	0.108433	9.22608e-47
snp_sb042060173374	T/C	1	2053226	1.375	1.07233	0.096342	0.0251984	0.0534255	0.055275	0.28391	0.528344	0.846742	0.675063	0.120336	0.164667	0.15111	4.65962e-58
snp_sb042060173702	G/T	1	2249739	1.20833	1.06783	0.0709254	0.0279762	0.0431477	0.0446429	0.321577	0.351618	0.756575	0.624565	0.150278	0.115052	0.108433	9.22608e-47
snp_sb042060173974	C/A	1	2361901	1.95833	1.77872	0.589039	0.7	0.412407	0.426682	-0.605291	-0.697351	-0.408521	0.170165	1.21916	0.496958	0.373475	1.26403e-14
snp_sb042060174023	G/C	1	2392735	1.625	1.17143	0.195672	0.0446429	0.115287	0.119283	0.45561	0.612767	0.887968	0.710685	0.101773	0.396924	0.31815	1.74697e-63
snp_sb042060174414	A/T	1	3109112	1.16667	1.04106	0.054172	0.0140873	0.0312032	0.0322865	0.500741	0.548531	0.896837	0.771496	0.0740459	0.136735	0.127386	6.10689e-65
snp_sb042060174446	G/A	1	3128678	1.70833	1.2471	0.267147	0.0615079	0.163908	0.169586	0.482679	0.624741	0.876448	0.670756	0.122714	0.497948	0.373972	5.38304e-62
snp_sb042060174448	A/C	1	3129037	1.16667	1.04464	0.0562487	0.0168651	0.0329625	0.0341065	0.456574	0.488355	0.874312	0.754345	0.0814133	0.134356	0.125331	8.18113e-62
snp_sb042060174651	A/T	1	3279528	1.45833	1.1187	0.135243	0.0448413	0.0792309	0.0819771	0.297394	0.434043	0.653964	0.388582	0.393365	0.129577	0.121182	1.78887e-35
snp_sb042060174722	G/A	1	3318438	1.45833	1.08095	0.113413	0.0279762	0.061481	0.0636084	0.365268	0.544962	0.827455	0.620812	0.152699	0.162382	0.149198	1.58399e-55
snp_sb042060174996	G/A	1	3602894	1.25	1.06623	0.0831592	0.0138889	0.0480556	0.0497126	0.671517	0.710983	0.941443	0.797394	0.0635212	0.237743	0.209482	3.6272e-71
snp_sb042060175032	A/C	1	3654266	1.25	1.03979	0.0615269	0.0196429	0.0326847	0.0338191	0.207608	0.39902	0.865428	0.776079	0.072132	0.14617	0.135487	1.38061e-60
snp_sb042060175160	A/C	1	3719410	1.41667	1.07376	0.11014	0.0335317	0.0596292	0.0616927	0.286005	0.437662	0.852392	0.737511	0.088978	0.227559	0.201667	9.03175e-59
snp_sb042060175521	C/A	1	3881642	1.66667	1.18999	0.216743	0.047619	0.129371	0.133858	0.467145	0.631918	0.887995	0.695707	0.109347	0.423961	0.334089	1.44634e-63
snp_sb042060176498	T/G	1	4583054	1.375	1.09616	0.114066	0.0390873	0.0661106	0.0683976	0.378044	0.408759	0.797842	0.658078	0.129894	0.193667	0.174914	9.95808e-52
snp_sb042060176625	T/C	1	4701685	1.41667	1.09282	0.116593	0.0390873	0.0659255	0.0682061	0.278259	0.407098	0.806489	0.67362	0.121129	0.202326	0.181858	8.21656e-53
snp_sb042060176666	T/C	1	4711478	1.29167	1.07488	0.0867527	0.0279762	0.0505551	0.0523057	0.275455	0.44662	0.851965	0.73249	0.0913017	0.189291	0.171375	9.79802e-59
snp_sb042060176733	G/A	1	4778713	1.70833	1.20258	0.235356	0.0583333	0.140234	0.145106	0.404577	0.58403	0.883233	0.719289	0.0975653	0.499612	0.374806	8.07168e-63
snp_sb042060177176	G/A	1	5064792	1.75	1.23362	0.262405	0.0640873	0.157847	0.16333	0.499736	0.593992	0.871367	0.683176	0.115938	0.498122	0.374059	3.09052e-61
snp_sb042060177238	A/T	1	5073279	1.75	1.23595	0.263066	0.0668651	0.158495	0.164001	0.493313	0.578126	0.865745	0.681766	0.116695	0.497948	0.373972	1.80498e-60
snp_sb042060177584	A/G	1	5450030	1.5	1.11826	0.154071	0.0446429	0.0874069	0.0904283	0.541243	0.489253	0.783564	0.576236	0.18385	0.206609	0.185266	5.98166e-50
snp_sb042060177600	A/C	1	5452267	1.45833	1.10912	0.140526	0.0363095	0.0799069	0.0826697	0.600548	0.545602	0.818308	0.600148	0.166564	0.200173	0.180138	2.55274e-54
snp_sb042060177617	A/G	1	5454070	1.58333	1.16712	0.200265	0.0583333	0.118027	0.122111	0.540731	0.505764	0.859272	0.715262	0.0995221	0.415022	0.328901	1.44342e-59
snp_sb042060177747	C/A	1	5705669	1.70833	1.15235	0.20316	0.055754	0.114606	0.118598	0.360764	0.513518	0.882623	0.758723	0.0795011	0.474546	0.361949	8.92079e-63
snp_sb042060177767	C/G	1	5708107	1.58333	1.14077	0.180385	0.0559524	0.103673	0.107292	0.348027	0.460302	0.880533	0.778642	0.0710718	0.467873	0.358421	1.51846e-62
snp_sb042060177833	G/T	1	5736900	1.79167	1.20626	0.233854	0.0527778	0.13747	0.142254	0.384258	0.616077	0.855111	0.622608	0.151536	0.362881	0.29704	6.55022e-59
snp_sb042060178085	C/G	1	5916421	1.45833	1.11832	0.128754	0.0446429	0.0759255	0.0785509	0.162864	0.412017	0.59429	0.309997	0.55646	0.110148	0.104082	1.63215e-29
snp_sb042060178104	A/G	1	5946086	1.66667	1.20307	0.240659	0.0472222	0.144308	0.14932	0.526225	0.672769	0.905382	0.710852	0.101691	0.499007	0.374503	6.36442e-66
snp_sb042060178275	A/C	1	6151385	1.5	1.17705	0.188734	0.0446429	0.116111	0.120122	0.483346	0.615514	0.893159	0.722119	0.0962034	0.418433	0.33089	2.74202e-64
snp_sb042060178668	T/C	1	6242806	1.70833	1.1597	0.216645	0.0587302	0.122472	0.126709	0.407602	0.520459	0.881428	0.752739	0.0821206	0.495515	0.372748	1.09804e-62
snp_sb042060178720	A/G	1	6260483	1.66667	1.15837	0.210094	0.0501984	0.119792	0.123962	0.504149	0.580952	0.895359	0.750289	0.0832049	0.479326	0.364449	1.48245e-64
snp_sb042060178745	C/A	1	6263850	1.66667	1.15837	0.210094	0.0501984	0.119792	0.123962	0.504149	0.580952	0.895359	0.750289	0.0832049	0.479326	0.364449	1.48245e-64
snp_sb042060178801	T/C	1	6294763	1.70833	1.16948	0.226513	0.0615079	0.129231	0.133701	0.43255	0.524046	0.875609	0.738648	0.0884562	0.494689	0.37233	6.95377e-62
snp_sb042060178865	C/A	1	6316903	1.70833	1.12497	0.192306	0.047619	0.103212	0.106786	0.441809	0.538631	0.883815	0.748174	0.0841468	0.410367	0.326166	4.7146e-63
snp_sb042060178980	G/A	1	6329784	1.70833	1.12497	0.192306	0.047619	0.103212	0.106786	0.441809	0.538631	0.883815	0.748174	0.0841468	0.410367	0.326166	4.7146e-63
snp_sb042060179249	T/C	1	6414464	1.20833	1.07727	0.0788675	0.0251984	0.0494723	0.0512247	0.254507	0.490656	0.878193	0.760855	0.0785779	0.204472	0.183567	4.65345e-62
snp_sb042060179292	A/G	1	6452126	1.20833	1.07727	0.0788675	0.0251984	0.0494723	0.0512247	0.254507	0.490656	0.878193	0.760855	0.0785779	0.204472	0.183567	4.65345e-62
snp_sb042060179410	G/T	1	6515109	1.41667	1.11117	0.121893	0.030754	0.0720649	0.0745963	0.337425	0.573246	0.867347	0.689159	0.112761	0.229611	0.20325	1.40187e-60
snp_sb042060179455	G/T	1	6529410	1.66667	1.19501	0.220119	0.0501984	0.130842	0.135374	0.462965	0.616344	0.897311	0.732341	0.0913711	0.489102	0.369492	7.54643e-65
snp_sb042060179566	G/A	1	6566791	1.54167	1.11962	0.152314	0.0309524	0.0859902	0.0889695	0.433398	0.640047	0.816975	0.491529	0.258617	0.169214	0.154898	2.68746e-54
snp_sb042060179810	G/A	1	6662830	1.66667	1.14372	0.189005	0.0559524	0.106083	0.109755	0.344192	0.472559	0.860611	0.735725	0.0898008	0.401921	0.321151	6.99684e-60
snp_sb042060179975	C/A	1	6707475	1.625	1.23501	0.253636	0.0501984	0.156481	0.161884	0.621523	0.679204	0.890087	0.657373	0.130302	0.457228	0.352699	7.53693e-64
snp_sb042060179997	C/T	1	6716426	1.66667	1.19359	0.233628	0.0587302	0.138212	0.142992	0.490814	0.575073	0.87662	0.709643	0.10229	0.476397	0.36292	4.92753e-62
snp_sb042060180030	G/A	1	6744521	1.66667	1.19037	0.230288	0.0615079	0.135898	0.140598	0.446998	0.547395	0.864853	0.701402	0.106429	0.455583	0.351805	1.95507e-60
snp_sb042060180256	T/G	1	6881895	1.54167	1.15204	0.174529	0.0335317	0.10331	0.106913	0.51642	0.675427	0.896023	0.67965	0.117837	0.320668	0.269254	1.31799e-64
snp_sb042060180344	C/G	1	6905415	1.70833	1.26587	0.27619	0.055754	0.172199	0.178177	0.537719	0.676224	0.887973	0.653999	0.132263	0.497575	0.373785	1.57679e-63
snp_sb042060180666	G/C	1	7119210	1.29167	1.06048	0.0691619	0.0166667	0.0390741	0.0404215	0.241691	0.57346	0.866071	0.686012	0.114425	0.124766	0.116983	1.6434e-60
snp_sb042060180812	C/G	1	7202511	1.75	1.18618	0.235238	0.0503968	0.135342	0.140023	0.475878	0.627634	0.876682	0.668825	0.12379	0.409184	0.325468	4.54862e-62
snp_sb042060180967	T/C	1	7289395	1.33333	1.06741	0.100189	0.0224206	0.0549995	0.0569034	0.566774	0.592349	0.897575	0.748744	0.0838923	0.219272	0.195232	5.66765e-65
snp_sb042060181257	G/A	1	7384309	1.54167	1.13618	0.158882	0.0337302	0.0918235	0.095004	0.463414	0.632663	0.888752	0.697149	0.108604	0.303598	0.257512	8.68164e-64
snp_sb042060181505	C/T	1	7443060	1.5	1.11484	0.131943	0.0251984	0.0758329	0.0784551	0.354162	0.667711	0.890067	0.669165	0.1236	0.229611	0.20325	6.46914e-64
snp_sb042060181854	A/G	1	7572223	1.33333	1.08577	0.100765	0.0279762	0.058518	0.0605432	0.357958	0.521922	0.848439	0.682978	0.116044	0.184884	0.167793	2.87332e-58
snp_sb042060182100	A/T	1	7656193	1.625	1.24119	0.241839	0.0416667	0.151574	0.156801	0.585503	0.725107	0.889298	0.59729	0.168557	0.37708	0.305986	1.08848e-63
snp_sb042060182190	T/A	1	7665299	1.625	1.24119	0.241839	0.0416667	0.151574	0.156801	0.585503	0.725107	0.889298	0.59729	0.168557	0.37708	0.305986	1.08848e-63
snp_sb042060182505	G/C	1	7780651	1.5	1.11361	0.141399	0.0196429	0.0804625	0.0832444	0.53744	0.755876	0.903773	0.605828	0.162659	0.204472	0.183567	7.40588e-66
snp_sb042060182732	G/A	1	7852727	1.58333	1.15207	0.17977	0.0416667	0.104722	0.108333	0.394452	0.602122	0.89944	0.74726	0.0845555	0.415022	0.328901	4.16435e-65
snp_sb042060182790	G/A	1	7889037	1.70833	1.23421	0.245448	0.0531746	0.150248	0.155472	0.434949	0.646087	0.884054	0.672388	0.121809	0.458039	0.353139	4.94987e-63
snp_sb042060182929	G/A	1	7970448	1.70833	1.33332	0.314416	0.0640873	0.203218	0.210265	0.55578	0.684637	0.871408	0.592243	0.172124	0.498448	0.374223	3.00999e-61
snp_sb042060183025	T/C	1	8023618	1.375	1.09148	0.11064	0.0277778	0.0635185	0.0657088	0.411378	0.562682	0.856219	0.67122	0.122456	0.193667	0.174914	3.51933e-59
snp_sb042060183033	C/T	1	8034619	1.5	1.11554	0.157624	0.030754	0.0895366	0.0926314	0.545775	0.656521	0.912227	0.74446	0.0858137	0.350963	0.289376	5.3012e-67
snp_sb042060183039	A/C	1	8035341	1.45833	1.13074	0.147367	0.0277778	0.0872222	0.0902299	0.5184	0.681529	0.9038	0.697932	0.108201	0.289383	0.247512	9.91555e-66
snp_sb042060183185	G/A	1	8066218	1.625	1.14736	0.198666	0.0416667	0.113212	0.11713	0.568321	0.63196	0.909569	0.75429	0.0814377	0.461205	0.35485	1.56063e-66
snp_sb042060184103	T/G	1	9022825	1.5	1.16346	0.178832	0.0474206	0.108898	0.112673	0.367223	0.56454	0.900585	0.771702	0.0739593	0.476397	0.36292	2.75353e-65
snp_sb042060184206	G/T	1	9061390	1.70833	1.22639	0.25293	0.0666667	0.152194	0.157456	0.417513	0.561962	0.846723	0.650083	0.134566	0.43544	0.340636	6.89601e-58
snp_sb042060184215	G/C	1	9062575	1.66667	1.22352	0.246841	0.0638889	0.149509	0.154678	0.445762	0.572674	0.853446	0.657044	0.130492	0.436437	0.341199	8.77092e-59
snp_sb042060184250	G/C	1	9074513	1.75	1.25005	0.273862	0.0694444	0.166546	0.172303	0.439588	0.583031	0.85518	0.652683	0.133034	0.479888	0.364742	5.22611e-59
snp_sb042060184357	T/C	1	9192259	1.625	1.16591	0.196618	0.0585317	0.115277	0.11926	0.288239	0.492253	0.877025	0.757803	0.0799009	0.476397	0.36292	4.92753e-62
snp_sb042060184501	C/T	1	9280997	1.29167	1.0424	0.0676577	0.0222222	0.0351852	0.0363985	0.216242	0.368421	0.903846	0.847756	0.044896	0.231656	0.204823	9.71773e-66
snp_sb042060184571	T/C	1	9291528	1.66667	1.17547	0.21056	0.0503968	0.12349	0.127763	0.362213	0.591896	0.89399	0.740238	0.0877294	0.475788	0.362601	1.90503e-64
snp_sb042060185204	G/T	1	9833936	1.625	1.18589	0.215578	0.047619	0.128398	0.132839	0.479137	0.629128	0.859154	0.620229	0.153077	0.338549	0.281241	1.03514e-59
snp_sb042060185289	G/T	1	9863226	1.625	1.12851	0.17572	0.0531746	0.097842	0.10123	0.357129	0.456526	0.796323	0.625231	0.149852	0.261392	0.227229	1.37073e-51
snp_sb042060185325	T/A	1	9865162	1.625	1.12851	0.17572	0.0531746	0.097842	0.10123	0.357129	0.456526	0.796323	0.625231	0.149852	0.261392	0.227229	1.37073e-51
snp_sb042060185360	A/C	1	9876302	1.625	1.12851	0.17572	0.0531746	0.097842	0.10123	0.357129	0.456526	0.796323	0.625231	0.149852	0.261392	0.227229	1.37073e-51
snp_sb042060185372	T/A	1	9877470	1.625	1.12851	0.17572	0.0531746	0.097842	0.10123	0.357129	0.456526	0.796323	0.625231	0.149852	0.261392	0.227229	1.37073e-51
snp_sb042060185446	A/C	1	9885015	1.66667	1.13798	0.187965	0.0503968	0.104972	0.108605	0.399618	0.519901	0.80553	0.594937	0.170213	0.259464	0.225803	9.4958e-53
snp_sb042060185552	G/T	1	9917985	1.29167	1.07985	0.0905599	0.0279762	0.0533329	0.0551793	0.266238	0.475442	0.901925	0.813033	0.0574904	0.285752	0.244925	1.47618e-65
snp_sb042060185636	T/C	1	10161968	1.25	1.03979	0.0615269	0.0251984	0.0326847	0.0338191	0.193871	0.229046	0.827367	0.776079	0.072132	0.14617	0.135487	1.56984e-55
snp_sb042060185766	A/C	1	10255146	1.125	1.07093	0.059041	0.00833333	0.0397222	0.041092	0.541536	0.79021	0.949266	0.758168	0.0797422	0.164667	0.15111	2.51923e-72
snp_sb042060185768	T/C	1	10255276	1.16667	1.0738	0.0651303	0.0111111	0.0424074	0.0438697	0.397531	0.737991	0.933278	0.745343	0.0854159	0.166945	0.153009	5.69663e-70
snp_sb042060185927	C/G	1	10356830	1.45833	1.14922	0.16708	0.0478175	0.10075	0.104244	0.443313	0.525384	0.896843	0.782651	0.0694271	0.462741	0.355676	7.12062e-65
snp_sb042060186045	G/A	1	10392442	1.54167	1.15619	0.188508	0.0416667	0.111574	0.115421	0.552237	0.626556	0.901055	0.735046	0.0901148	0.421773	0.332827	2.46969e-65
snp_sb042060186818	C/T	1	10679007	1.5	1.13113	0.154557	0.0339286	0.0902868	0.0934205	0.432832	0.624213	0.845214	0.588101	0.175097	0.219272	0.195232	4.94945e-58
snp_sb042060193744	G/A	1	15460279	1.58333	1.11536	0.166715	0.0420635	0.0917158	0.0949142	0.445543	0.541371	0.843765	0.659342	0.129166	0.269027	0.232839	1.18705e-57
snp_sb042060193829	T/G	1	15595942	1.58333	1.15548	0.197419	0.0531746	0.114494	0.118477	0.52904	0.535567	0.810372	0.5917	0.172511	0.280247	0.240978	2.63859e-53
snp_sb042060194164	A/G	1	15780249	1.58333	1.14609	0.183988	0.0666667	0.106268	0.109946	0.357332	0.372655	0.711901	0.540765	0.212308	0.231656	0.204823	2.0682e-41
snp_sb042060194354	A/G	1	15880060	1.20833	1.08493	0.0948243	0.022619	0.059093	0.0611567	0.631585	0.617229	0.889933	0.712446	0.100904	0.202326	0.181858	8.79202e-64
snp_sb042060194557	A/T	1	16408170	1.66667	1.19844	0.233653	0.0611111	0.139231	0.144046	0.541434	0.561081	0.838313	0.631624	0.145805	0.378458	0.306843	8.81913e-57
snp_sb042060194721	C/T	1	16440125	1.625	1.25732	0.255389	0.0583333	0.161175	0.166747	0.54765	0.638075	0.882761	0.676069	0.119785	0.497377	0.373685	9.54138e-63
snp_sb042060195009	G/A	1	16640928	1.20833	1.03976	0.0592231	0.0194444	0.0323148	0.0334291	0.249147	0.398281	0.866635	0.77836	0.0711882	0.14617	0.135487	1.38061e-60
snp_sb042060195017	G/T	1	16641334	1.20833	1.03976	0.0592231	0.0194444	0.0323148	0.0334291	0.249147	0.398281	0.866635	0.77836	0.0711882	0.14617	0.135487	1.38061e-60
snp_sb042060195031	T/C	1	16642434	1.20833	1.03976	0.0592231	0.0194444	0.0323148	0.0334291	0.249147	0.398281	0.866635	0.77836	0.0711882	0.14617	0.135487	1.38061e-60
snp_sb042060195431	T/G	1	16802952	1.58333	1.12517	0.174061	0.0392857	0.0974263	0.100812	0.520803	0.596765	0.870535	0.678933	0.118225	0.303598	0.257512	2.9331e-61
snp_sb042060195494	A/G	1	16842099	1.66667	1.19342	0.220541	0.0335317	0.131027	0.135566	0.583283	0.744086	0.932936	0.737945	0.0887787	0.499996	0.374998	5.91486e-70
snp_sb042060195627	A/T	1	16919477	1.45833	1.0934	0.124947	0.0444444	0.0694444	0.0718391	0.369771	0.36	0.830827	0.735667	0.0898275	0.263313	0.228646	8.00882e-56
snp_sb042060195680	G/A	1	17073083	1.25	1.09384	0.0965919	0.0305556	0.060463	0.0625479	0.373326	0.49464	0.828121	0.659888	0.128852	0.178215	0.162335	1.77991e-55
snp_sb042060196385	T/C	1	18104898	1.625	1.16855	0.213046	0.0474206	0.124453	0.128765	0.527019	0.618969	0.876772	0.676592	0.119499	0.385227	0.311027	5.14415e-62
snp_sb042060196388	G/A	1	18105318	1.625	1.18914	0.231094	0.0474206	0.137594	0.14237	0.588642	0.655358	0.879295	0.649766	0.134754	0.393095	0.315833	2.36155e-62
snp_sb042060196448	C/G	1	18115584	1.29167	1.08576	0.106421	0.0138889	0.0628704	0.0650383	0.733124	0.779087	0.943353	0.743576	0.0862131	0.24575	0.215553	1.89775e-71
snp_sb042060196485	C/T	1	18136047	1.20833	1.06105	0.0714767	0.0194444	0.0428704	0.0443487	0.307438	0.546436	0.895814	0.770295	0.0745512	0.187091	0.16959	1.30975e-64
snp_sb042060201438	C/A	1	21499485	1.41667	1.15752	0.159681	0.0416667	0.0999074	0.103352	0.486651	0.582947	0.731337	0.355805	0.452632	0.155481	0.143394	1.17772e-43
snp_sb042060201501	C/T	1	21503274	1.41667	1.15752	0.159681	0.0416667	0.0999074	0.103352	0.486651	0.582947	0.731337	0.355805	0.452632	0.155481	0.143394	1.17772e-43
snp_sb042060202405	A/G	1	22052482	1.70833	1.23007	0.256176	0.0503968	0.155019	0.16039	0.532932	0.674899	0.89906	0.689512	0.112575	0.499344	0.374672	3.82093e-65
snp_sb042060202815	A/G	1	22189235	1.5	1.12007	0.154719	0.0337302	0.0885374	0.0916165	0.524311	0.619029	0.903404	0.746446	0.0849202	0.349439	0.288385	8.15524e-66
snp_sb042060202934	G/A	1	22267955	1.33333	1.0551	0.0832428	0.0277778	0.0446296	0.0461686	0.262232	0.377593	0.818182	0.707879	0.103168	0.153165	0.141435	3.39098e-54
snp_sb042060202992	G/T	1	22275540	1.29167	1.05223	0.0771535	0.0305556	0.0419444	0.0433908	0.151558	0.271523	0.796918	0.721224	0.0966331	0.150841	0.139464	1.65706e-51
snp_sb042060203273	C/A	1	22435573	1.20833	1.0638	0.0727228	0.0111111	0.0435185	0.0450192	0.659029	0.744681	0.917089	0.675265	0.120225	0.134356	0.125331	1.25372e-67
snp_sb042060204637	A/C	1	24743434	1.66667	1.28015	0.284233	0.0700397	0.180372	0.186623	0.505308	0.611693	0.858112	0.634599	0.143949	0.493793	0.371877	1.47978e-59
snp_sb042060205393	G/C	1	25022383	1.20833	1.08941	0.0840811	0.0305556	0.0536111	0.0554598	0.472998	0.430052	0.715507	0.500844	0.249157	0.107685	0.101887	7.29943e-42
snp_sb042060205411	C/T	1	25033782	1.41667	1.16934	0.174343	0.0448413	0.109046	0.11282	0.676436	0.588785	0.802735	0.520287	0.230504	0.227559	0.201667	2.02751e-52
snp_sb042060205452	G/C	1	25077065	1.45833	1.13469	0.160717	0.0450397	0.094546	0.0978266	0.673742	0.523622	0.84225	0.668856	0.123772	0.285752	0.244925	1.45015e-57
snp_sb042060205511	G/T	1	25116999	1.08333	1.06091	0.0496386	0.0222222	0.0340741	0.035249	0.464286	0.347826	0.777743	0.659207	0.129244	0.100248	0.0952227	3.81468e-49
snp_sb042060206252	C/T	1	25491635	1.5	1.19736	0.208144	0.0617063	0.129731	0.134225	0.557178	0.524352	0.688342	0.344771	0.475119	0.198012	0.178408	4.09513e-39
snp_sb042060207055	A/C	1	25896525	1.29167	1.03875	0.0657692	0.0138889	0.0334259	0.0345785	0.45083	0.584488	0.923779	0.816561	0.056162	0.182669	0.165985	1.36739e-68
snp_sb042060207342	T/G	1	26009809	1.125	1.07006	0.0590926	0.0335317	0.0396292	0.041003	0.133445	0.153862	0.647696	0.583634	0.178351	0.0952507	0.0907143	9.26761e-35
snp_sb042060232392	G/C	1	52829634	1.66667	1.29076	0.274479	0.0978175	0.175009	0.181064	0.341086	0.441072	0.804237	0.649753	0.134762	0.499612	0.374806	1.64714e-52
snp_sb042060232636	A/G	1	52903009	1.58333	1.22657	0.229633	0.0668651	0.14399	0.148976	0.388056	0.535628	0.863616	0.706305	0.103955	0.489909	0.369904	3.58537e-60
snp_sb042060233107	A/G	1	53056967	1.75	1.21212	0.241474	0.102976	0.14287	0.147804	0.285091	0.279231	0.761535	0.669151	0.123608	0.432403	0.338917	3.29448e-47
snp_sb042060233305	C/T	1	53114756	1.58333	1.16211	0.192492	0.0779762	0.112962	0.116865	0.431588	0.309716	0.636843	0.473903	0.277535	0.215082	0.191952	1.40563e-33
snp_sb042060233583	T/A	1	53161286	1.5	1.24308	0.224447	0.0757937	0.145482	0.150525	0.451183	0.479016	0.845017	0.702519	0.105862	0.488687	0.36928	7.7239e-58
snp_sb042060233820	C/G	1	53456591	1.625	1.31387	0.284104	0.0865079	0.185667	0.192095	0.473426	0.53407	0.826974	0.628645	0.147681	0.499984	0.374992	2.2437e-55
snp_sb042060233866	G/A	1	53476405	1.41667	1.15754	0.154998	0.0305556	0.0971296	0.100479	0.460475	0.685415	0.910398	0.715175	0.099565	0.341699	0.28332	1.15316e-66
snp_sb042060235745	C/T	1	53933442	1.45833	1.18626	0.189972	0.0422619	0.119083	0.12321	0.452306	0.645106	0.902166	0.724329	0.0951471	0.432403	0.338917	1.11926e-65
snp_sb042060236353	T/C	1	54139527	1.66667	1.23194	0.241402	0.0501984	0.148703	0.153838	0.508974	0.662426	0.869033	0.612035	0.158473	0.383889	0.310204	5.77231e-61
snp_sb042060236541	T/C	1	54210457	1.70833	1.27316	0.270526	0.0613095	0.169629	0.175486	0.417509	0.638567	0.872282	0.646635	0.136617	0.480443	0.36503	2.21168e-61
snp_sb042060238285	G/T	1	54943613	1.125	1.06041	0.0539817	0.0279762	0.0351847	0.0364053	0.217178	0.204877	0.733851	0.665273	0.125786	0.105213	0.0996784	4.10493e-44
snp_sb042060238689	C/T	1	55049722	1.375	1.15722	0.147051	0.0111111	0.0944444	0.0977011	0.54023	0.882353	0.955045	0.617882	0.154608	0.247732	0.217047	3.48197e-73
snp_sb042060239393	A/T	1	55373083	1.20833	1.05997	0.076359	0.025	0.0450926	0.0466475	0.370334	0.445585	0.877438	0.778934	0.0709516	0.204472	0.183567	4.65345e-62
snp_sb042060239675	G/C	1	55470653	1.33333	1.13441	0.138652	0.0138889	0.0873148	0.0903257	0.651379	0.840933	0.938262	0.611874	0.158581	0.225499	0.200074	1.06444e-70
snp_sb042060239858	G/C	1	55517192	1.66667	1.18299	0.212031	0.053373	0.124816	0.129151	0.497672	0.572387	0.836054	0.616601	0.155449	0.325638	0.272618	1.05796e-56
snp_sb042060239864	G/T	1	55517368	1.66667	1.18649	0.214443	0.0561508	0.126761	0.131163	0.482672	0.557033	0.828384	0.612576	0.158112	0.327279	0.273723	1.0684e-55
snp_sb042060240156	C/A	1	55636073	1.25	1.0499	0.0700948	0.0224206	0.0390736	0.0404283	0.250025	0.426195	0.886584	0.802344	0.0615869	0.198012	0.178408	1.8955e-63
snp_sb042060240489	G/T	1	55830140	1.5	1.19086	0.19567	0.05	0.121852	0.126054	0.488998	0.589666	0.885004	0.719752	0.0973421	0.43544	0.340636	4.35684e-63
snp_sb042060245574	A/G	1	58095617	1.29167	1.05206	0.0779298	0.0138889	0.0421296	0.0435824	0.58773	0.67033	0.857544	0.567884	0.190231	0.097753	0.0929751	2.31766e-59
snp_sb042060246412	G/A	1	58377437	1.29167	1.05606	0.080486	0.0277778	0.0444161	0.0459618	0.275112	0.374601	0.818574	0.709904	0.10216	0.153165	0.141435	3.39098e-54
snp_sb042060246524	C/A	1	58415199	1.5	1.12128	0.153022	0.0446429	0.0886201	0.0916963	0.299851	0.496244	0.807198	0.61727	0.155009	0.231656	0.204823	7.41171e-53
snp_sb042060246601	C/G	1	58466210	1.70833	1.29924	0.296374	0.0728175	0.187872	0.194381	0.494497	0.612409	0.843796	0.596988	0.168769	0.466446	0.35766	1.17129e-57
snp_sb042060246603	T/A	1	58467956	1.66667	1.29637	0.290285	0.0700397	0.185187	0.191604	0.527559	0.621789	0.84952	0.602128	0.165194	0.46572	0.357273	2.02908e-58
snp_sb042060246692	C/A	1	58491881	1.58333	1.21655	0.231459	0.0867063	0.142594	0.147542	0.42634	0.391936	0.810583	0.688492	0.113112	0.458039	0.353139	2.3977e-53
snp_sb042060247227	T/C	1	58644236	1.625	1.197	0.208995	0.078373	0.126946	0.131355	0.321761	0.382626	0.722201	0.550031	0.20452	0.28209	0.242302	9.01881e-43
snp_sb042060247548	T/G	1	58988830	1.625	1.18036	0.205969	0.0666667	0.122379	0.126613	0.406215	0.455245	0.855553	0.73484	0.0902099	0.461977	0.355265	4.6155e-59
snp_sb042060247736	G/A	1	59025530	1.66667	1.1866	0.221299	0.0416667	0.131019	0.135536	0.499695	0.681979	0.913093	0.726726	0.0940085	0.479888	0.364742	4.90397e-67
snp_sb042060248948	G/A	1	59450758	1.375	1.09488	0.12156	0.0388889	0.0699717	0.0723986	0.398028	0.444219	0.886555	0.795882	0.064117	0.343262	0.284348	2.66676e-63
snp_sb042060249132	T/C	1	59565953	1.5	1.1402	0.169243	0.0444444	0.0996013	0.10305	0.451997	0.553776	0.844264	0.650991	0.13403	0.285752	0.244925	1.45015e-57
snp_sb042060250437	G/A	1	60413119	1.41667	1.1792	0.168779	0.0583333	0.1075	0.111207	0.482723	0.457364	0.782681	0.599511	0.167006	0.269027	0.232839	9.72916e-50
snp_sb042060250790	A/G	1	60677666	1.58333	1.14044	0.165914	0.05	0.0955556	0.0988506	0.326307	0.476744	0.833024	0.680891	0.117166	0.300091	0.255064	4.16664e-56
snp_sb042060254155	A/C	1	62167938	1.625	1.21004	0.234335	0.0865079	0.141778	0.146693	0.32115	0.389836	0.824514	0.712395	0.100929	0.493156	0.371555	4.57296e-55
snp_sb042060254259	G/A	1	62244177	1.375	1.10843	0.134514	0.0333333	0.0794161	0.0821687	0.565065	0.58027	0.876807	0.706494	0.10386	0.270917	0.234219	5.9444e-62
snp_sb042060254341	A/C	1	62288107	1.58333	1.17565	0.196109	0.0698413	0.116593	0.120639	0.359407	0.400982	0.860287	0.766764	0.0760457	0.49986	0.37493	8.70662e-60
snp_sb042060254517	G/C	1	62350265	1.58333	1.17103	0.193382	0.0642857	0.114556	0.118532	0.325998	0.438827	0.861743	0.753628	0.0817286	0.464246	0.356484	5.79293e-60
snp_sb042060254518	T/C	1	62351281	1.58333	1.17103	0.193382	0.0642857	0.114556	0.118532	0.325998	0.438827	0.861743	0.753628	0.0817286	0.464246	0.356484	5.79293e-60
snp_sb042060254617	C/G	1	62398381	1.625	1.18917	0.210249	0.072619	0.125712	0.130061	0.320721	0.42234	0.801984	0.65721	0.130396	0.367222	0.299796	3.01137e-52
snp_sb042060254696	T/A	1	62418756	1.5	1.16435	0.182711	0.025	0.111019	0.114847	0.661942	0.774812	0.934529	0.70926	0.10248	0.382543	0.309373	3.79617e-70
snp_sb042060254886	C/A	1	62536074	1.375	1.13256	0.147946	0.0527778	0.0910185	0.0941571	0.302727	0.420142	0.820564	0.690552	0.112029	0.294772	0.251327	1.70938e-54
snp_sb042060255002	G/A	1	62607866	1.70833	1.20431	0.240597	0.0698413	0.141963	0.146885	0.428932	0.508033	0.859293	0.713991	0.100144	0.496508	0.373248	1.16536e-59
snp_sb042060255073	G/T	1	62637237	1.70833	1.22625	0.252666	0.0638889	0.152101	0.15736	0.494706	0.579958	0.85475	0.654202	0.132145	0.440348	0.343395	5.87271e-59
snp_sb042060255108	C/G	1	62662440	1.66667	1.21046	0.232848	0.0640873	0.140379	0.14524	0.423222	0.543471	0.860925	0.695365	0.109524	0.461205	0.35485	7.68426e-60
snp_sb042060255111	G/A	1	62662852	1.41667	1.16016	0.168347	0.00833333	0.104567	0.108236	0.845161	0.920306	0.97609	0.699978	0.107154	0.348596	0.287837	3.87418e-76
snp_sb042060255203	C/A	1	62698528	1.79167	1.2603	0.288257	0.093254	0.173805	0.179879	0.398914	0.463456	0.803584	0.633923	0.14437	0.474115	0.361723	4.87189e-52
snp_sb042060255450	A/G	1	62799480	1.70833	1.21439	0.233447	0.072619	0.140527	0.145387	0.34919	0.483239	0.845564	0.701146	0.106559	0.470636	0.359887	7.68702e-58
snp_sb042060255599	C/T	1	62865288	1.29167	1.05561	0.0821901	0.0222222	0.0449717	0.0465365	0.457181	0.505862	0.859104	0.714865	0.0997166	0.157789	0.14534	1.57467e-59
snp_sb042060255790	A/T	1	62925111	1.41667	1.09747	0.128577	0.0416667	0.0730272	0.0755595	0.391191	0.429436	0.844928	0.728212	0.0933065	0.269027	0.232839	1.18705e-57
snp_sb042060255832	A/T	1	62933949	1.70833	1.22214	0.246528	0.072619	0.148675	0.153816	0.328118	0.51156	0.827163	0.646145	0.13691	0.420667	0.332187	1.90755e-55
snp_sb042060259362	A/T	1	65826456	1.29167	1.10748	0.101854	0.0583333	0.0637963	0.0659962	0.0496782	0.0856313	0.430701	0.377386	0.412451	0.102734	0.0974571	3.38071e-16
snp_sb042060260091	G/A	1	66234106	1.41667	1.08703	0.121194	0.0333333	0.067963	0.0703065	0.384515	0.509537	0.74209	0.474149	0.27726	0.129577	0.121182	6.72902e-45
snp_sb042060260112	T/C	1	66258089	1.45833	1.09645	0.133811	0.0361111	0.0750926	0.077682	0.41865	0.519112	0.735227	0.449407	0.306288	0.136735	0.127386	4.1959e-44
snp_sb042060260358	A/T	1	66382429	1.33333	1.06479	0.0935516	0.0305556	0.0513889	0.0531609	0.384872	0.405405	0.91121	0.850671	0.0438857	0.344818	0.285368	8.83744e-67
snp_sb042060260697	T/C	1	67217203	1.45833	1.09624	0.134813	0.0472222	0.0750926	0.077682	0.409537	0.371147	0.892608	0.829226	0.0514861	0.440348	0.343395	3.81271e-64
snp_sb042060260755	C/T	1	67246556	1.54167	1.16973	0.196197	0.0611111	0.117379	0.121441	0.515109	0.47937	0.83465	0.682403	0.116352	0.370078	0.301599	2.6629e-56
snp_sb042060261157	C/T	1	67745541	1.08333	1.03269	0.0343685	0	0.0214815	0.0222222	1	1	1	0.795294	0.0643491	0.105213	0.0996784	4.6487e-80
snp_sb042060261162	G/C	1	67753700	1.08333	1.03269	0.0343685	0	0.0214815	0.0222222	1	1	1	0.795294	0.0643491	0.105213	0.0996784	4.6487e-80
snp_sb042060261856	G/A	1	69873616	1.58333	1.17892	0.203641	0.0388889	0.122009	0.12623	0.500386	0.681261	0.893118	0.664672	0.126125	0.364336	0.297966	3.24562e-64
snp_sb042060262120	C/T	1	70001957	1.54167	1.19123	0.201342	0.0555556	0.12349	0.127763	0.440732	0.550122	0.879968	0.73319	0.0909757	0.461977	0.355265	2.45879e-62
snp_sb042060262149	A/G	1	70014301	1.5	1.18907	0.200823	0.053373	0.124261	0.128577	0.548833	0.570475	0.877983	0.715926	0.0991982	0.436437	0.341199	3.04413e-62
snp_sb042060262205	A/T	1	70037726	1.66667	1.20012	0.225977	0.0611111	0.135157	0.139832	0.406607	0.54785	0.866682	0.705146	0.104536	0.458842	0.353574	1.45111e-60
snp_sb042060262711	C/T	1	70874870	1.375	1.18435	0.16947	0.075	0.110249	0.114065	0.359837	0.319724	0.694457	0.550854	0.203841	0.24575	0.215553	1.73134e-39
snp_sb042060262952	C/T	1	70941732	1.16667	1.06922	0.0676007	0.0361111	0.0426852	0.0441571	0.339594	0.154013	0.786062	0.747114	0.0846208	0.169214	0.154898	3.68221e-50
snp_sb042060264701	C/A	1	72881570	1.375	1.06102	0.0956685	0.0277778	0.0507124	0.0524752	0.40351	0.452249	0.873188	0.768487	0.0753146	0.219272	0.195232	1.87984e-61
snp_sb042060264709	C/T	1	72881995	1.20833	1.11252	0.0938812	0.0560065	0.0628929	0.0653064	0.0592675	0.109494	0.625017	0.57891	0.181846	0.138151	0.128608	8.09421e-31
snp_sb042060264710	C/A	1	72882155	1.41667	1.06084	0.0976418	0.0333333	0.0508976	0.0526668	0.256263	0.34509	0.850655	0.771961	0.0738507	0.223431	0.19847	2.07744e-58
snp_sb042060264715	T/C	1	72883793	1.375	1.06102	0.0956685	0.0277778	0.0507124	0.0524752	0.40351	0.452249	0.873188	0.768487	0.0753146	0.219272	0.195232	1.87984e-61
snp_sb042060264720	G/A	1	72884225	1.375	1.05797	0.0915525	0.0305556	0.0482124	0.049889	0.288568	0.36623	0.861818	0.781969	0.0697059	0.221355	0.196856	6.60212e-60
snp_sb042060264721	G/T	1	72884373	1.20833	1.12375	0.0972264	0.0925866	0.0661484	0.0687625	-0.276306	-0.399679	0.213423	0.43803	0.320737	0.10661	0.100928	0.000113972
snp_sb042060266097	G/C	1	73501115	1.5	1.10341	0.136223	0.0418651	0.0763884	0.0790298	0.264319	0.451945	0.78588	0.609309	0.160301	0.195843	0.176666	3.06108e-50
snp_sb042060266102	T/C	1	73501350	1.5	1.10678	0.139039	0.0446429	0.078518	0.0812329	0.247106	0.431432	0.769108	0.593907	0.170941	0.193667	0.174914	3.39874e-48
snp_sb042060266106	T/C	1	73501499	1.5	1.13252	0.149993	0.0863095	0.0884255	0.0914819	0.0582799	0.023929	0.460063	0.446826	0.309501	0.16009	0.147275	2.60869e-18
snp_sb042060266181	A/G	1	73518680	1.45833	1.10431	0.128378	0.055754	0.0731477	0.0756773	0.213145	0.237789	0.79092	0.725693	0.0944984	0.26713	0.231451	7.81974e-51
snp_sb042060266221	G/T	1	73524147	1.20833	1.071	0.0734113	0.0305556	0.0450926	0.0466475	0.341863	0.322382	0.818976	0.732852	0.0911331	0.169214	0.154898	2.68746e-54
snp_sb042060266478	A/C	1	73608526	1.5	1.20991	0.200997	0.0779762	0.127592	0.131999	0.443879	0.388864	0.792118	0.659844	0.128877	0.375695	0.305122	5.9601e-51
snp_sb042060266647	A/T	1	73655525	1.25	1.07861	0.0868194	0.0418651	0.0523143	0.0541256	0.23808	0.19974	0.758646	0.698405	0.107958	0.17373	0.158639	5.94519e-47
snp_sb042060266686	C/A	1	73658657	1.16667	1.06638	0.0668544	0.0305556	0.0419444	0.0433908	0.394157	0.271523	0.813975	0.744639	0.0857332	0.164667	0.15111	1.17063e-53
snp_sb042060266939	G/A	1	73690076	1.20833	1.09632	0.0880588	0.0388889	0.0568519	0.0588123	0.433103	0.315961	0.822222	0.740106	0.0877895	0.219272	0.195232	1.0345e-54
snp_sb042060267164	A/G	1	73737253	1.45833	1.1385	0.153474	0.072619	0.0920559	0.0952563	0.169493	0.211142	0.370988	0.20263	0.983777	0.115052	0.108433	2.21453e-12
snp_sb042060267285	T/C	1	73774042	1.41667	1.12698	0.138176	0.0613095	0.0828793	0.0857576	0.301475	0.260256	0.54424	0.383895	0.40122	0.134356	0.125331	6.67213e-25
snp_sb042060267394	C/G	1	73825294	1.20833	1.09595	0.0879661	0.0472222	0.0567593	0.0587165	0.351675	0.168026	0.782047	0.73803	0.0887398	0.217181	0.193597	1.15355e-49
snp_sb042060267502	G/C	1	73844401	1.20833	1.09595	0.0879661	0.0472222	0.0567593	0.0587165	0.351675	0.168026	0.782047	0.73803	0.0887398	0.217181	0.193597	1.15355e-49
snp_sb042060267559	C/T	1	73855085	1.375	1.19865	0.173554	0.0613095	0.11399	0.117942	0.46086	0.462152	0.787957	0.605756	0.162708	0.289383	0.247512	1.95323e-50
snp_sb042060267705	G/T	1	73902359	1.16667	1.06922	0.0676007	0.0361111	0.0426852	0.0441571	0.339594	0.154013	0.786062	0.747114	0.0846208	0.169214	0.154898	3.68221e-50
snp_sb042060267715	A/T	1	73903014	1.16667	1.08409	0.0754906	0.0333333	0.0492309	0.0509427	0.572222	0.322919	0.650437	0.48372	0.266828	0.0952507	0.0907143	9.26761e-35
snp_sb042060267741	A/C	1	73905995	1.16667	1.08409	0.0754906	0.0333333	0.0492309	0.0509427	0.572222	0.322919	0.650437	0.48372	0.266828	0.0952507	0.0907143	9.26761e-35
snp_sb042060267753	A/T	1	73907187	1.16667	1.08409	0.0754906	0.0333333	0.0492309	0.0509427	0.572222	0.322919	0.650437	0.48372	0.266828	0.0952507	0.0907143	9.26761e-35
snp_sb042060267769	A/T	1	73908975	1.16667	1.08409	0.0754906	0.0333333	0.0492309	0.0509427	0.572222	0.322919	0.650437	0.48372	0.266828	0.0952507	0.0907143	9.26761e-35
snp_sb042060267791	G/A	1	73918997	1.16667	1.06922	0.0676007	0.0361111	0.0426852	0.0441571	0.339594	0.154013	0.786062	0.747114	0.0846208	0.169214	0.154898	3.68221e-50
snp_sb042060267857	C/A	1	73995120	1.375	1.07111	0.10529	0.030754	0.0576016	0.0596082	0.362029	0.466091	0.891593	0.796956	0.0636935	0.283925	0.243618	4.30969e-64
snp_sb042060268227	C/T	1	74258351	1.45833	1.09705	0.130365	0.0418651	0.0730551	0.0755816	0.364314	0.426938	0.713185	0.499505	0.250496	0.14617	0.135487	1.02345e-41
snp_sb042060268378	A/G	1	74313372	1.33333	1.08234	0.102555	0.0388889	0.0590457	0.0610959	0.35072	0.341377	0.845296	0.76511	0.0767506	0.251674	0.220004	1.0641e-57
snp_sb042060268638	G/C	1	74465163	1.33333	1.05477	0.0867629	0.0222222	0.0458976	0.0474944	0.422266	0.51583	0.896577	0.786391	0.0679079	0.215082	0.191952	1.07485e-64
snp_sb042060272629	T/G	1	77183911	1.54167	1.19198	0.197005	0.0555556	0.121871	0.126099	0.38363	0.544144	0.83655	0.641445	0.139745	0.340128	0.282284	1.54972e-56
snp_sb042060272909	C/G	1	77250033	1.75	1.16178	0.202243	0.0777778	0.114601	0.118567	0.15001	0.321318	0.839058	0.762861	0.0777135	0.483609	0.36667	7.25069e-57
snp_sb042060272913	A/G	1	77250378	1.375	1.11256	0.128907	0.0444444	0.0770559	0.0797391	0.319631	0.423218	0.789322	0.634734	0.143865	0.210861	0.18863	1.7421e-50
snp_sb042060273269	A/G	1	77432019	1.5	1.0964	0.137416	0.0361111	0.0756198	0.0782415	0.423149	0.522465	0.893192	0.776334	0.0720264	0.338549	0.281241	3.16843e-64
snp_sb042060273487	A/C	1	77664345	1.25	1.08848	0.0947764	0.0166667	0.0579346	0.0599465	0.613056	0.712319	0.909785	0.686406	0.114216	0.184884	0.167793	1.46312e-66
snp_sb042060273572	T/A	1	77722457	1.375	1.12785	0.12995	0.0444444	0.0796485	0.0824211	0.408167	0.441993	0.630572	0.337951	0.489752	0.119925	0.112734	1.10392e-32
snp_sb042060273647	G/A	1	77743487	1.20833	1.08371	0.0877994	0.0305556	0.054537	0.0564176	0.54137	0.439728	0.828121	0.693223	0.110635	0.178215	0.162335	1.77991e-55
snp_sb042060273650	C/G	1	77744466	1.33333	1.11357	0.111283	0.0416667	0.0687963	0.0711686	0.266779	0.394347	0.759567	0.603019	0.164581	0.17373	0.158639	5.94519e-47
snp_sb042060273909	G/T	1	77865263	1.54167	1.09936	0.147688	0.0388889	0.0801417	0.0829411	0.396797	0.514749	0.856559	0.704399	0.104912	0.270917	0.234219	3.64681e-59
snp_sb042060273915	A/G	1	77866046	1.54167	1.09936	0.147688	0.0388889	0.0801417	0.0829411	0.396797	0.514749	0.856559	0.704399	0.104912	0.270917	0.234219	3.64681e-59
snp_sb042060274031	T/A	1	77961825	1.33333	1.1198	0.121331	0.0527778	0.0745087	0.0770921	0.406612	0.291656	0.765702	0.669232	0.123563	0.225499	0.200074	1.20543e-47
snp_sb042060274223	G/A	1	78063951	1.45833	1.20828	0.183073	0.0583333	0.11863	0.122747	0.314977	0.508275	0.799587	0.592428	0.171992	0.291187	0.248792	8.6851e-52
snp_sb042060274231	T/C	1	78074421	1.41667	1.16707	0.152488	0.0333333	0.0972411	0.10062	0.377552	0.657209	0.841991	0.539051	0.213778	0.210861	0.18863	3.14989e-57
snp_sb042060274591	G/C	1	78234227	1.54167	1.23476	0.212618	0.0527778	0.136944	0.141667	0.391404	0.614604	0.894437	0.726092	0.0943089	0.499984	0.374992	2.2174e-64
snp_sb042060274656	A/G	1	78319783	1.125	1.06625	0.0619593	0.0138889	0.0402967	0.0417123	0.773756	0.655334	0.8771	0.643422	0.138547	0.112604	0.106264	6.54468e-62
snp_sb042060275013	T/C	1	78611114	1.33333	1.10609	0.101569	0.0388889	0.0624074	0.0645594	0.173223	0.376855	0.772645	0.63515	0.143608	0.171476	0.156774	1.60052e-48
snp_sb042060275152	A/G	1	78678630	1.125	1.06011	0.055448	0.00833333	0.0356481	0.0368774	0.763248	0.766234	0.931713	0.707882	0.103166	0.122349	0.114865	9.61823e-70
snp_sb042060275153	A/T	1	78679745	1.125	1.06011	0.055448	0.00833333	0.0356481	0.0368774	0.763248	0.766234	0.931713	0.707882	0.103166	0.122349	0.114865	9.61823e-70
snp_sb042060275476	G/A	1	78851191	1.5	1.14503	0.158211	0.0472222	0.0943707	0.097651	0.355011	0.49961	0.741744	0.483892	0.266644	0.182669	0.165985	9.44935e-45
snp_sb042060275565	C/A	1	78910046	1.375	1.15915	0.160057	0.0555556	0.101111	0.104598	0.504683	0.450549	0.839286	0.7075	0.103357	0.343262	0.284348	9.86964e-57
snp_sb042060275625	C/G	1	78927289	1.83333	1.6631	0.495478	0.627381	0.347538	0.359574	-0.693704	-0.805216	-0.457069	0.192857	1.0463	0.430339	0.337743	5.27111e-18
snp_sb042060275848	C/G	1	79039188	1.29167	1.08652	0.097678	0.0333333	0.0581198	0.0601381	0.409957	0.426472	0.823764	0.692716	0.110898	0.189291	0.171375	7.11459e-55
snp_sb042060275961	A/T	1	79102367	1.375	1.13008	0.132563	0.0583333	0.0813889	0.0841954	0.254545	0.283276	0.740701	0.638216	0.141717	0.225499	0.200074	9.89687e-45
snp_sb042060276438	T/C	1	79262453	1.29167	1.04535	0.0719252	0.0305556	0.0378704	0.0391762	0.0861287	0.193154	0.818976	0.775639	0.0723147	0.169214	0.154898	2.68746e-54
snp_sb042060276622	A/C	1	79377316	1.45833	1.13719	0.146313	0.0611111	0.0875642	0.0905978	0.245638	0.3021	0.735909	0.621593	0.152193	0.231656	0.204823	3.87954e-44
snp_sb042060276623	C/T	1	79379152	1.45833	1.13719	0.146313	0.0611111	0.0875642	0.0905978	0.245638	0.3021	0.735909	0.621593	0.152193	0.231656	0.204823	3.87954e-44
snp_sb042060276951	C/T	1	79483144	1.33333	1.05874	0.0850658	0.0194444	0.0460185	0.0476054	0.408552	0.577465	0.881621	0.719836	0.0973015	0.164667	0.15111	1.23169e-62
snp_sb042060276993	C/A	1	79488559	1.54167	1.11716	0.150553	0.0472222	0.0843235	0.0872453	0.379608	0.439987	0.704888	0.473027	0.278511	0.16009	0.147275	1.30516e-40
snp_sb042060277393	G/C	1	79853406	1.25	1.09101	0.0993232	0.0333333	0.0605272	0.0626285	0.550307	0.449284	0.760342	0.564826	0.192615	0.139105	0.12943	5.61387e-47
snp_sb042060277394	T/A	1	79855237	1.25	1.09101	0.0993232	0.0333333	0.0605272	0.0626285	0.550307	0.449284	0.760342	0.564826	0.192615	0.139105	0.12943	5.61387e-47
snp_sb042060277454	A/G	1	79877374	1.25	1.08123	0.0872352	0.0361111	0.0528704	0.0546935	0.267208	0.316988	0.725666	0.598347	0.167818	0.131971	0.123262	5.21367e-43
snp_sb042060277758	C/T	1	79986749	1.58333	1.10582	0.153518	0.0388889	0.0839078	0.0868272	0.32551	0.536528	0.856417	0.690201	0.112213	0.270917	0.234219	3.64681e-59
snp_sb042060278178	A/G	1	80327270	1.70833	1.31704	0.299598	0.0833333	0.191994	0.19865	0.455979	0.565958	0.833317	0.615975	0.155861	0.499965	0.374983	4.24521e-56
snp_sb042060278180	G/T	1	80331205	1.20833	1.07821	0.0797159	0.0194444	0.0495087	0.05123	0.583283	0.607252	0.841112	0.595445	0.169854	0.122349	0.114865	4.07083e-57
snp_sb042060279054	G/A	2	1028568	1.41667	1.12537	0.140912	0.0446429	0.084444	0.0873632	0.322737	0.471332	0.716654	0.464039	0.288748	0.157789	0.14534	4.25599e-42
snp_sb042060279118	G/A	2	1059732	1.29167	1.08247	0.0943664	0.0388889	0.0559259	0.0578544	0.230589	0.304636	0.709811	0.582681	0.179051	0.134356	0.125331	3.17131e-41
snp_sb042060279121	C/G	2	1060409	1.375	1.07888	0.104947	0.0418651	0.0591662	0.0612137	0.20698	0.292416	0.627818	0.474011	0.277414	0.112604	0.106264	9.68436e-33
snp_sb042060279644	T/A	2	1573591	1.70833	1.34628	0.318998	0.100198	0.207509	0.214685	0.424024	0.517137	0.794673	0.574771	0.184956	0.488264	0.369063	3.15554e-51
snp_sb042060279811	T/A	2	1612811	1.625	1.26464	0.25423	0.055754	0.161666	0.167248	0.488773	0.655129	0.879553	0.650749	0.134173	0.461977	0.355265	2.45879e-62
snp_sb042060280218	A/C	2	2080359	1.70833	1.3026	0.292422	0.0587302	0.186175	0.192609	0.578055	0.684544	0.882469	0.627424	0.148455	0.499752	0.374876	7.98811e-63
snp_sb042060280335	G/C	2	2147752	1.66667	1.2962	0.289375	0.072619	0.184786	0.191173	0.502529	0.607011	0.854758	0.630417	0.146563	0.499996	0.374998	4.81675e-59
snp_sb042060280362	T/A	2	2158360	1.70833	1.30674	0.304896	0.078373	0.193639	0.200363	0.52108	0.595262	0.843121	0.612392	0.158235	0.499438	0.374719	2.5117e-57
snp_sb042060280392	T/C	2	2174237	1.16667	1.08062	0.0746561	0.0194444	0.0486111	0.0502874	0.442477	0.6	0.810234	0.525585	0.225661	0.102734	0.0974571	3.47878e-53
snp_sb042060280632	G/A	2	2315735	1.75	1.22586	0.260389	0.0642857	0.155435	0.160809	0.447209	0.586413	0.869913	0.685466	0.114715	0.494398	0.372183	4.18861e-61
snp_sb042060280698	A/T	2	2341745	1.20833	1.07807	0.0843222	0.0222222	0.0524074	0.0542146	0.434518	0.575972	0.879508	0.71584	0.0992402	0.184884	0.167793	2.41192e-62
snp_sb042060280727	G/A	2	2349460	1.58333	1.25933	0.251928	0.0644841	0.161366	0.16697	0.44865	0.600385	0.860131	0.649991	0.134621	0.461205	0.35485	7.68426e-60
snp_sb042060281069	T/C	2	2576038	1.5	1.13615	0.156216	0.0529762	0.0921292	0.0953134	0.256354	0.424979	0.8262	0.69775	0.108294	0.30534	0.258724	2.70196e-55
snp_sb042060281071	C/G	2	2576406	1.25	1.02655	0.048108	0.0194444	0.0234259	0.0242337	0.070045	0.16996	0.810234	0.771377	0.0740958	0.102734	0.0974571	3.47878e-53
snp_sb042060281413	A/G	2	2688057	1.375	1.09264	0.114416	0.030754	0.0665736	0.0688766	0.353158	0.538046	0.855354	0.686883	0.113963	0.212976	0.190296	3.56226e-59
snp_sb042060281415	T/A	2	2688654	1.375	1.09264	0.114416	0.030754	0.0665736	0.0688766	0.353158	0.538046	0.855354	0.686883	0.113963	0.212976	0.190296	3.56226e-59
snp_sb042060281436	A/C	2	2693587	1.58333	1.2367	0.227694	0.0583333	0.143981	0.148946	0.454473	0.594855	0.836277	0.59589	0.169541	0.356984	0.293265	1.58215e-56
snp_sb042060281524	G/C	2	2747435	1.41667	1.10484	0.132077	0.0363095	0.0765736	0.0792214	0.377111	0.525822	0.835687	0.653478	0.132568	0.221355	0.196856	1.45839e-56
snp_sb042060281662	G/A	2	2780939	1.70833	1.19678	0.235219	0.0619048	0.13829	0.143094	0.461976	0.552355	0.857483	0.68163	0.116768	0.433423	0.339495	1.65552e-59
snp_sb042060282152	G/C	2	3265922	1.58333	1.20554	0.206186	0.172222	0.127407	0.131801	-0.155705	-0.351744	0.0432099	0.292181	0.605634	0.180446	0.164165	0.416162
snp_sb042060282552	G/T	2	3427375	1.375	1.09257	0.115591	0.0251984	0.0673143	0.0696429	0.42665	0.625661	0.881484	0.683399	0.115818	0.212976	0.190296	9.85843e-63
snp_sb042060283108	A/T	2	3707766	1.25	1.04972	0.0698011	0.0111111	0.0387037	0.0400383	0.585728	0.712919	0.922547	0.730207	0.0923689	0.143823	0.13348	2.05536e-68
snp_sb042060283161	T/G	2	3726241	1.33333	1.13401	0.129676	0.028373	0.0817682	0.0846082	0.481791	0.653007	0.833654	0.520608	0.230208	0.166945	0.153009	3.8912e-56
snp_sb042060283458	C/T	2	3762022	1.5	1.13472	0.171623	0.0397436	0.100293	0.103811	0.519867	0.603723	0.859362	0.645101	0.137536	0.283345	0.243203	1.38216e-59
snp_sb042060283459	G/C	2	3764517	1.5	1.12919	0.16728	0.0361111	0.0969444	0.100287	0.538245	0.627507	0.870859	0.653306	0.132669	0.280247	0.240978	3.72724e-61
snp_sb042060283652	C/A	2	3889233	1.75	1.24906	0.266338	0.0728175	0.161583	0.167175	0.471297	0.54935	0.853361	0.674606	0.120586	0.496737	0.373363	6.45446e-59
snp_sb042060283721	G/T	2	3925818	1.54167	1.14722	0.168143	0.0472222	0.0989531	0.102379	0.47325	0.522782	0.897853	0.785953	0.0680851	0.462741	0.355676	7.12062e-65
snp_sb042060283746	A/C	2	3927565	1.625	1.15655	0.18781	0.0529762	0.108342	0.112099	0.446502	0.51103	0.887186	0.769282	0.0749784	0.469957	0.359527	1.94281e-63
snp_sb042060284170	T/C	2	4040808	1.91667	1.59886	0.497587	0.472421	0.336666	0.348283	-0.245446	-0.403232	0.0380057	0.314444	0.545055	0.490685	0.370299	0.507884
snp_sb042060284221	C/A	2	4085315	1.29167	1.03606	0.0614602	0.0224206	0.0309255	0.0319992	0.10238	0.27501	0.861719	0.809265	0.0589222	0.162382	0.149198	4.56088e-60
snp_sb042060284235	T/C	2	4098822	1.41667	1.20203	0.196215	0.0587302	0.126037	0.13041	0.557395	0.534026	0.847117	0.671907	0.122075	0.382543	0.309373	5.71595e-58
snp_sb042060284236	G/T	2	4100639	1.25	1.03319	0.0553708	0.0196429	0.0282403	0.0292214	0.12519	0.304438	0.877118	0.823334	0.0536435	0.16009	0.147275	3.60315e-62
snp_sb042060284674	G/C	2	4419867	1.625	1.19511	0.222047	0.0531746	0.133212	0.13782	0.451474	0.600828	0.891655	0.728576	0.0931351	0.491062	0.370491	4.11743e-64
snp_sb042060284890	C/T	2	4481899	1.58333	1.16977	0.193408	0.0388889	0.115157	0.119142	0.511064	0.662296	0.865199	0.600832	0.16609	0.285752	0.244925	3.60056e-60
snp_sb042060285094	G/C	2	4514966	1.70833	1.17923	0.22802	0.0583333	0.131546	0.136096	0.428254	0.556555	0.883003	0.736163	0.0895989	0.498448	0.374223	8.80491e-63
snp_sb042060285238	A/G	2	4561670	1.625	1.21674	0.232831	0.0422619	0.141861	0.146773	0.571252	0.702089	0.908221	0.691926	0.11131	0.459637	0.354004	1.72679e-66
snp_sb042060285289	G/C	2	4591297	1.58333	1.11639	0.158672	0.053373	0.0883423	0.091409	0.225879	0.395839	0.66679	0.448475	0.307444	0.16009	0.147275	7.30768e-37
snp_sb042060285290	A/G	2	4591545	1.58333	1.11639	0.158672	0.053373	0.0883423	0.091409	0.225879	0.395839	0.66679	0.448475	0.307444	0.16009	0.147275	7.30768e-37
snp_sb042060285298	C/T	2	4591875	1.58333	1.11639	0.158672	0.053373	0.0883423	0.091409	0.225879	0.395839	0.66679	0.448475	0.307444	0.16009	0.147275	7.30768e-37
snp_sb042060285302	T/C	2	4592823	1.16667	1.05152	0.0604895	0.0279762	0.0362958	0.0375547	0.0892742	0.229217	0.720691	0.637629	0.142078	0.100248	0.0952227	1.29124e-42
snp_sb042060285398	G/A	2	4633889	1.54167	1.11336	0.15183	0.0448413	0.0851568	0.0881074	0.294948	0.473427	0.653964	0.342852	0.479178	0.129577	0.121182	1.78887e-35
snp_sb042060285826	C/T	2	4784636	1.70833	1.27774	0.287308	0.05	0.179601	0.185809	0.629353	0.721606	0.896538	0.62836	0.147861	0.483609	0.36667	1.09936e-64
snp_sb042060285905	G/A	2	4814130	1.33333	1.06741	0.0836662	0.030754	0.0474995	0.0491448	0.111329	0.352542	0.817974	0.718861	0.0977724	0.169214	0.154898	2.68746e-54
snp_sb042060286043	C/G	2	4921236	1.625	1.22203	0.238584	0.0587302	0.146731	0.151805	0.459683	0.599742	0.846273	0.615929	0.155891	0.382543	0.309373	5.71595e-58
snp_sb042060286063	T/A	2	4935079	1.375	1.07864	0.104066	0.0305556	0.0586111	0.0606322	0.292534	0.478673	0.868941	0.748606	0.0839541	0.233692	0.206386	6.76482e-61
snp_sb042060286213	T/C	2	4967260	1.54167	1.16697	0.187092	0.0503968	0.112009	0.115885	0.356506	0.550063	0.854116	0.675768	0.119949	0.343262	0.284348	7.01097e-59
snp_sb042060286395	A/T	2	5306091	1.41667	1.088	0.118455	0.0335317	0.0668514	0.0691639	0.287448	0.498414	0.877707	0.756188	0.0806057	0.274672	0.23695	3.48737e-62
snp_sb042060287054	C/T	2	5573976	1.375	1.08261	0.105697	0.0335317	0.0603699	0.0624589	0.217372	0.444562	0.846816	0.724211	0.0952033	0.219272	0.195232	4.94945e-58
snp_sb042060287199	T/A	2	5625343	1.58333	1.13197	0.166595	0.0446429	0.0946292	0.0978996	0.392899	0.528234	0.863361	0.710368	0.10193	0.327279	0.273723	3.28578e-60
snp_sb042060287386	C/G	2	5689916	1.75	1.26794	0.281728	0.0583333	0.174167	0.180172	0.522725	0.665072	0.88326	0.651449	0.13376	0.499612	0.374806	8.07168e-63
snp_sb042060287495	A/G	2	5722270	1.45833	1.08745	0.122328	0.0388889	0.0673791	0.0697166	0.277991	0.422834	0.86544	0.766861	0.0760044	0.289383	0.247512	2.11216e-60
snp_sb042060287519	A/G	2	5755600	1.66667	1.17457	0.21024	0.0416667	0.122685	0.126916	0.486146	0.660377	0.915344	0.750735	0.083007	0.492489	0.371216	2.35519e-67
snp_sb042060287595	G/A	2	5786951	1.5	1.07236	0.119352	0.0444444	0.0616383	0.0637779	0.215782	0.278948	0.87151	0.821803	0.0542093	0.346366	0.286381	3.14645e-61
snp_sb042060287614	G/A	2	5787780	1.66667	1.18543	0.215337	0.055754	0.127592	0.131999	0.359742	0.56303	0.887231	0.74193	0.0869592	0.494099	0.372032	2.02846e-63
snp_sb042060287881	G/C	2	5834841	1.625	1.13889	0.182886	0.05	0.103675	0.107264	0.361544	0.517725	0.880997	0.753247	0.0818964	0.420667	0.332187	1.5767e-62
snp_sb042060287882	T/C	2	5836461	1.79167	1.20331	0.240829	0.0613095	0.14037	0.145218	0.366172	0.563229	0.876528	0.717306	0.0985261	0.496737	0.373363	5.91792e-62
snp_sb042060287884	T/C	2	5838445	1.75	1.20141	0.233418	0.0640873	0.1375	0.142248	0.363943	0.533909	0.870607	0.722388	0.0960746	0.495515	0.372748	3.82178e-61
snp_sb042060287899	C/G	2	5849605	1.5	1.09401	0.130343	0.0333333	0.0716383	0.0741227	0.385684	0.5347	0.886079	0.755167	0.0810524	0.292983	0.250064	3.10977e-63
snp_sb042060287944	A/G	2	5870514	1.66667	1.12699	0.1827	0.0416667	0.0998791	0.103337	0.478551	0.582829	0.901603	0.764132	0.0771684	0.423961	0.334089	2.092e-65
snp_sb042060287947	T/C	2	5870751	1.70833	1.13283	0.195135	0.0529762	0.106305	0.109991	0.447906	0.50166	0.87617	0.751516	0.082661	0.428244	0.336547	6.33957e-62
snp_sb042060288002	C/A	2	5885427	1.70833	1.12619	0.188942	0.0585317	0.102046	0.105585	0.365485	0.426418	0.863851	0.762634	0.0778111	0.430339	0.337743	3.04108e-60
snp_sb042060288018	T/C	2	5896076	1.75	1.13534	0.202487	0.0613095	0.109546	0.113344	0.38016	0.440331	0.858406	0.747004	0.08467	0.433423	0.339495	1.65552e-59
snp_sb042060288028	G/A	2	5906958	1.75	1.13241	0.196691	0.0527778	0.106175	0.109851	0.388855	0.502919	0.875364	0.749264	0.083661	0.423961	0.334089	9.40055e-62
snp_sb042060288255	G/A	2	6070154	1.66667	1.25278	0.258717	0.0416667	0.161731	0.167322	0.536747	0.74237	0.906025	0.635233	0.143556	0.442257	0.344461	5.55007e-66
snp_sb042060288507	T/C	2	6114578	1.70833	1.18749	0.22801	0.0503968	0.132935	0.137533	0.414372	0.62089	0.896874	0.727978	0.093417	0.488264	0.369063	7.98808e-65
snp_sb042060288706	A/G	2	6203646	1.66667	1.27977	0.275583	0.0555556	0.174046	0.180061	0.530063	0.680799	0.869703	0.591802	0.172439	0.425043	0.334712	6.66873e-61
snp_sb042060288845	A/T	2	6403095	1.375	1.06176	0.0917394	0.0224206	0.0492588	0.0509647	0.319749	0.54484	0.928458	0.842821	0.0466229	0.313933	0.264656	2.36327e-69
snp_sb042060289219	G/A	2	6554234	1.33333	1.09248	0.105642	0.0363095	0.0628699	0.0650452	0.268528	0.422466	0.790674	0.637552	0.142125	0.174164	0.158997	1.05513e-50
snp_sb042060289229	A/T	2	6557150	1.33333	1.09248	0.105642	0.0363095	0.0628699	0.0650452	0.268528	0.422466	0.790674	0.637552	0.142125	0.174164	0.158997	1.05513e-50
snp_sb042060289728	A/T	2	6615133	1.58333	1.10881	0.153871	0.0363095	0.0843514	0.0872674	0.333354	0.569544	0.897258	0.761319	0.0783775	0.353989	0.291335	7.03546e-65
snp_sb042060289918	T/A	2	6684501	1.20833	1.07422	0.0771023	0.0251984	0.0478699	0.0495279	0.358822	0.473606	0.842363	0.700535	0.10687	0.16009	0.147275	1.75598e-57
snp_sb042060291025	T/C	2	7091439	1.45833	1.0681	0.0927217	0.0390873	0.0488884	0.0505816	0.088127	0.200479	0.7087	0.635656	0.143294	0.134356	0.125331	3.17131e-41
snp_sb042060291094	C/A	2	7105744	1.5	1.08775	0.114327	0.0363095	0.0621292	0.0642789	0.161457	0.41558	0.83253	0.713442	0.100414	0.217181	0.193597	3.75636e-56
snp_sb042060291229	A/T	2	7120142	1.45833	1.0681	0.0927217	0.0390873	0.0488884	0.0505816	0.088127	0.200479	0.7087	0.635656	0.143294	0.134356	0.125331	3.17131e-41
snp_sb042060291465	A/C	2	7224596	1.58333	1.21307	0.21798	0.0474206	0.135462	0.140141	0.429596	0.649935	0.902898	0.722617	0.0959645	0.488687	0.36928	1.22233e-65
snp_sb042060291466	T/A	2	7227169	1.58333	1.21307	0.21798	0.0474206	0.135462	0.140141	0.429596	0.649935	0.902898	0.722617	0.0959645	0.488687	0.36928	1.22233e-65
snp_sb042060291470	C/T	2	7233461	1.58333	1.21307	0.21798	0.0474206	0.135462	0.140141	0.429596	0.649935	0.902898	0.722617	0.0959645	0.488687	0.36928	1.22233e-65
snp_sb042060291471	T/C	2	7234398	1.54167	1.11973	0.152163	0.047619	0.085805	0.0887779	0.267316	0.445032	0.856443	0.741324	0.0872346	0.332155	0.276992	2.38144e-59
snp_sb042060291473	A/G	2	7239074	1.54167	1.11973	0.152163	0.047619	0.085805	0.0887779	0.267316	0.445032	0.856443	0.741324	0.0872346	0.332155	0.276992	2.38144e-59
snp_sb042060291474	G/A	2	7239888	1.58333	1.21645	0.220796	0.0501984	0.137592	0.142344	0.414843	0.635165	0.89712	0.71801	0.0981847	0.488264	0.369063	7.98808e-65
snp_sb042060291494	C/T	2	7250391	1.25	1.0941	0.0877044	0.0277778	0.0553704	0.0572797	0.278789	0.498328	0.722179	0.446211	0.310273	0.100248	0.0952227	1.29124e-42
snp_sb042060291562	G/A	2	7288232	1.25	1.0941	0.0877044	0.0277778	0.0553704	0.0572797	0.278789	0.498328	0.722179	0.446211	0.310273	0.100778	0.0956995	2.23088e-42
snp_sb042060291618	G/C	2	7350785	1.5	1.1031	0.142242	0.030754	0.0793514	0.082095	0.467898	0.612433	0.874639	0.676543	0.119526	0.24575	0.215553	8.96102e-62
snp_sb042060291805	T/G	2	7427751	1.5	1.23847	0.227114	0.0527778	0.146204	0.151245	0.502099	0.639012	0.885033	0.681522	0.116826	0.459637	0.354004	4.35489e-63
snp_sb042060292456	T/G	2	7685778	1.75	1.23372	0.258231	0.0638889	0.155805	0.161192	0.459797	0.589943	0.871692	0.687097	0.11385	0.497765	0.37388	3.18131e-61
snp_sb042060292688	G/C	2	7748627	1.25	1.03926	0.0624961	0.00833333	0.0328704	0.0340038	0.593444	0.746479	0.946267	0.788054	0.067237	0.155481	0.143394	7.00987e-72
snp_sb042060292775	C/G	2	7762842	1.5	1.10976	0.14714	0.0361111	0.0832407	0.0861111	0.420362	0.566185	0.869126	0.698318	0.108003	0.276538	0.238301	6.41638e-61
snp_sb042060293013	A/C	2	7828146	1.75	1.26851	0.282089	0.0777778	0.174231	0.180253	0.427536	0.553594	0.839058	0.639473	0.140947	0.483609	0.36667	7.25069e-57
snp_sb042060293179	C/T	2	7880091	1.625	1.16365	0.187017	0.0779762	0.109444	0.113225	0.197231	0.287524	0.783898	0.696688	0.108841	0.361419	0.296107	6.13238e-50
snp_sb042060293429	T/G	2	7983795	1.58333	1.20671	0.216166	0.0724206	0.132962	0.137555	0.370103	0.45533	0.735876	0.515075	0.235366	0.274672	0.23695	3.08412e-44
snp_sb042060294719	G/A	2	8451281	1.54167	1.22975	0.230478	0.0722222	0.145898	0.150943	0.519344	0.50498	0.799902	0.595778	0.169619	0.361419	0.296107	7.51759e-52
snp_sb042060295227	G/A	2	8906089	1.66667	1.24273	0.255667	0.0555556	0.157379	0.16282	0.570674	0.646995	0.879161	0.657685	0.130121	0.458842	0.353574	3.19175e-62
snp_sb042060295585	A/T	2	9076820	1.58333	1.23843	0.230776	0.075	0.146019	0.151054	0.384494	0.486367	0.759284	0.531346	0.220503	0.31223	0.263486	6.58458e-47
snp_sb042060295587	A/G	2	9079174	1.58333	1.23521	0.227436	0.0722222	0.143704	0.148659	0.387329	0.497423	0.766921	0.536232	0.216216	0.310519	0.262308	8.03574e-48
snp_sb042060295693	G/C	2	9134538	1.33333	1.08669	0.096168	0.0444444	0.0568519	0.0588123	0.0904392	0.218241	0.753086	0.684156	0.115414	0.180446	0.164165	3.4885e-46
snp_sb042060296067	G/A	2	9400420	1.375	1.09916	0.121544	0.0416667	0.0709902	0.0734522	0.394297	0.413064	0.799616	0.658592	0.129598	0.204472	0.183567	2.34692e-51
snp_sb042060296131	G/C	2	9425036	1.54167	1.21294	0.210129	0.0833333	0.131852	0.136398	0.344371	0.367978	0.724925	0.56477	0.192658	0.303598	0.257512	6.52663e-43
snp_sb042060296214	C/T	2	9442676	1.45833	1.29254	0.243645	0.0722222	0.164444	0.170115	0.569258	0.560811	0.794701	0.53255	0.21944	0.35248	0.290359	3.23835e-51
snp_sb042060296372	C/A	2	9482185	1.33333	1.10108	0.109384	0.0277778	0.0655556	0.0678161	0.367946	0.576271	0.776786	0.473214	0.278302	0.124766	0.116983	5.0033e-49
snp_sb042060297268	C/T	2	9725990	1.66667	1.22653	0.240756	0.0833333	0.147222	0.152299	0.376215	0.433962	0.820574	0.683014	0.116025	0.463497	0.356082	2.13266e-54
snp_sb042060297471	G/A	2	9793186	1.41667	1.13878	0.146879	0.0555556	0.0898148	0.0929119	0.401929	0.381443	0.647024	0.429356	0.332268	0.157789	0.14534	1.52957e-34
snp_sb042060297578	A/G	2	9813618	1.58333	1.17341	0.200008	0.0666667	0.119601	0.12374	0.376403	0.442592	0.791822	0.626524	0.149027	0.320668	0.269254	7.65924e-51
snp_sb042060297887	A/G	2	9988481	1.5	1.10278	0.142538	0.0416667	0.079537	0.0822797	0.270865	0.476135	0.864782	0.741884	0.08698	0.3088	0.261122	2.50465e-60
snp_sb042060297902	G/C	2	9993044	1.33333	1.0973	0.126408	0	0.0741667	0.0768603	1	1	1	0.734765	0.090245	0.266335	0.230868	5.70291e-79
snp_sb042060298496	G/T	2	10223188	1.45833	1.15406	0.17089	0.0583333	0.103796	0.107375	0.326011	0.438002	0.872486	0.773106	0.0733711	0.458039	0.353139	2.32402e-61
snp_sb042060298497	G/T	2	10223358	1.45833	1.15406	0.17089	0.0583333	0.103796	0.107375	0.326011	0.438002	0.872486	0.773106	0.0733711	0.458039	0.353139	2.32402e-61
snp_sb042060298656	C/A	2	10262649	1.625	1.17109	0.189263	0.0583333	0.112101	0.115981	0.324834	0.479637	0.804207	0.623737	0.15081	0.298326	0.253827	2.16521e-52
snp_sb042060299137	C/T	2	10400456	1.5	1.11988	0.147785	0.0583333	0.0847222	0.0876437	0.307451	0.311475	0.791388	0.697016	0.108672	0.280247	0.240978	8.22817e-51
snp_sb042060299138	A/G	2	10400697	1.5	1.11988	0.147785	0.0583333	0.0847222	0.0876437	0.307451	0.311475	0.791388	0.697016	0.108672	0.280247	0.240978	8.22817e-51
snp_sb042060299606	A/G	2	10585501	1.625	1.23023	0.243079	0.0555556	0.149601	0.154774	0.519244	0.628643	0.888857	0.70071	0.106781	0.49981	0.374905	1.34339e-63
snp_sb042060299660	G/A	2	10605704	1.625	1.26149	0.252571	0.0722222	0.159786	0.16531	0.495687	0.548008	0.853173	0.675156	0.120285	0.492144	0.371041	9.80921e-59
snp_sb042060300250	T/G	2	11078741	1.58333	1.23315	0.224943	0.0638889	0.141944	0.146839	0.466251	0.549902	0.785378	0.523166	0.227859	0.298326	0.253827	4.56124e-50
snp_sb042060300344	G/A	2	11088790	1.58333	1.23653	0.22776	0.0611111	0.144074	0.149042	0.492706	0.575835	0.793481	0.513116	0.237219	0.296553	0.252581	4.5368e-51
snp_sb042060300460	C/G	2	11100976	1.16667	1.08026	0.0705359	0.0166667	0.0461111	0.0477011	0.567768	0.638554	0.87988	0.667668	0.124438	0.139105	0.12943	2.13608e-62
snp_sb042060300772	T/C	2	11183207	1.375	1.06928	0.0854567	0.0361111	0.0469444	0.0485632	0.204764	0.230769	0.725666	0.643366	0.138581	0.132997	0.124153	1.2075e-42
snp_sb042060301294	T/C	2	11460995	1.375	1.17771	0.157336	0.0638889	0.102315	0.105843	0.328862	0.375566	0.649383	0.438504	0.32012	0.182669	0.165985	8.84031e-35
snp_sb042060301316	A/G	2	11462860	1.45833	1.18578	0.170175	0.0666667	0.108333	0.112069	0.275848	0.384615	0.646943	0.426283	0.336465	0.189291	0.171375	1.56729e-34
snp_sb042060302008	A/C	2	12243572	1.70833	1.21267	0.240143	0.116667	0.14349	0.148452	0.262879	0.186936	0.745357	0.68681	0.114002	0.457228	0.352699	3.83984e-45
snp_sb042060302131	C/T	2	12350491	1.33333	1.13289	0.130818	0.0666667	0.0824074	0.085249	0.262132	0.191011	0.51952	0.406073	0.365653	0.139105	0.12943	7.46399e-23
snp_sb042060302150	C/G	2	12372504	1.375	1.17742	0.171402	0.0416667	0.109907	0.113697	0.616473	0.620893	0.82433	0.536622	0.215877	0.237743	0.209482	5.54632e-55
snp_sb042060302269	G/A	2	12410881	1.25	1.09715	0.0918205	0.0527778	0.0578704	0.0598659	0.0890374	0.088	0.530075	0.484731	0.26575	0.112604	0.106264	9.97309e-24
snp_sb042060302278	G/T	2	12412973	1.625	1.26149	0.255269	0.0888889	0.161667	0.167241	0.401065	0.450172	0.768032	0.578108	0.182445	0.381189	0.308536	9.49804e-48
snp_sb042060303245	C/G	2	12757616	1.45833	1.16039	0.162245	0.0779762	0.10037	0.103838	0.27431	0.223112	0.438692	0.277491	0.650929	0.139105	0.12943	8.51949e-17
snp_sb042060304001	A/C	2	13036238	1.45833	1.14008	0.149554	0.0696429	0.0902773	0.0933976	0.185656	0.228567	0.598505	0.479547	0.271326	0.17373	0.158639	7.20982e-30
snp_sb042060304434	C/T	2	13177574	1.5	1.13551	0.148598	0.080754	0.0874995	0.0905241	0.148005	0.0770925	0.653846	0.624931	0.150044	0.233692	0.206386	2.68521e-35
snp_sb042060304638	G/C	2	13293723	1.66667	1.29507	0.277752	0.105754	0.177962	0.184106	0.351709	0.405751	0.702023	0.498565	0.251439	0.355491	0.292304	2.14705e-40
snp_sb042060304968	G/A	2	13659531	1.66667	1.30131	0.283408	0.100198	0.181851	0.188129	0.374035	0.449009	0.715263	0.483227	0.267355	0.35248	0.290359	7.21195e-42
snp_sb042060304978	C/G	2	13670976	1.66667	1.30131	0.283408	0.100198	0.181851	0.188129	0.374035	0.449009	0.715263	0.483227	0.267355	0.35248	0.290359	7.21195e-42
snp_sb042060305069	C/G	2	13722011	1.5	1.1822	0.176999	0.0779762	0.11074	0.114566	0.219926	0.295864	0.532208	0.335651	0.494822	0.166945	0.153009	5.79174e-24
snp_sb042060305088	T/C	2	13742427	1.70833	1.29654	0.304138	0.0946429	0.191583	0.19821	0.437054	0.505996	0.806715	0.608738	0.160686	0.489909	0.369904	9.70468e-53
snp_sb042060305322	T/G	2	13834799	1.70833	1.29611	0.29025	0.105754	0.18325	0.189589	0.367401	0.422897	0.770889	0.602999	0.164594	0.461977	0.355265	2.57072e-48
snp_sb042060305850	G/A	2	14265018	1.375	1.12382	0.133211	0.05	0.0808976	0.0837013	0.299536	0.381935	0.700333	0.515153	0.235293	0.166945	0.153009	4.12294e-40
snp_sb042060307669	C/T	2	15126839	1.625	1.17305	0.20019	0.0696429	0.117231	0.121294	0.493738	0.405936	0.733384	0.5512	0.203556	0.261392	0.227229	6.37675e-44
snp_sb042060311033	C/G	2	16480915	1.45833	1.15894	0.170981	0.0527778	0.103796	0.107375	0.486746	0.491525	0.818353	0.642761	0.138947	0.291187	0.248792	3.28367e-54
snp_sb042060311036	T/G	2	16481207	1.45833	1.15894	0.170981	0.0527778	0.103796	0.107375	0.486746	0.491525	0.818353	0.642761	0.138947	0.291187	0.248792	3.28367e-54
snp_sb042060311039	G/A	2	16482281	1.45833	1.15894	0.170981	0.0527778	0.103796	0.107375	0.486746	0.491525	0.818353	0.642761	0.138947	0.291187	0.248792	3.28367e-54
snp_sb042060311379	G/A	2	16649452	1.25	1.07638	0.0849373	0.0222222	0.0509259	0.052682	0.595329	0.563636	0.82806	0.60597	0.162562	0.129577	0.121182	1.80394e-55
snp_sb042060313541	A/C	2	18524602	1.66667	1.17812	0.212607	0.0668651	0.12362	0.127903	0.415344	0.459108	0.793417	0.618069	0.154485	0.323989	0.271504	4.15871e-51
snp_sb042060313664	G/A	2	18570439	1.54167	1.12288	0.15893	0.0472222	0.0902494	0.0933756	0.40871	0.476759	0.869694	0.750964	0.0829052	0.362881	0.29704	5.56811e-61
snp_sb042060313718	G/C	2	18573483	1.54167	1.12288	0.15893	0.0472222	0.0902494	0.0933756	0.40871	0.476759	0.869694	0.750964	0.0829052	0.362881	0.29704	5.56811e-61
snp_sb042060315134	C/T	2	18994368	1.70833	1.19673	0.236083	0.0890873	0.13862	0.14342	0.377699	0.357328	0.801268	0.690772	0.111914	0.448693	0.34803	4.56504e-52
snp_sb042060315561	C/G	2	19168012	1.625	1.17131	0.203348	0.0666667	0.119231	0.123356	0.464887	0.440861	0.848101	0.728335	0.0932488	0.439382	0.342854	4.5288e-58
snp_sb042060317287	T/C	2	19785761	1.33333	1.08868	0.112139	0.0333333	0.0655556	0.0678161	0.428893	0.491525	0.898947	0.801263	0.0620074	0.330537	0.27591	4.81917e-65
snp_sb042060317344	A/G	2	19789931	1.33333	1.08868	0.112139	0.0333333	0.0655556	0.0678161	0.428893	0.491525	0.898947	0.801263	0.0620074	0.330537	0.27591	4.81917e-65
snp_sb042060317949	T/C	2	20020771	1.41667	1.08888	0.114999	0.0194444	0.0639815	0.0661877	0.621146	0.696093	0.902626	0.679592	0.117868	0.200173	0.180138	1.4423e-65
snp_sb042060318260	A/G	2	20180674	1.70833	1.18005	0.223756	0.0585317	0.129907	0.134394	0.486411	0.549433	0.857973	0.684781	0.11508	0.41271	0.327545	1.84291e-59
snp_sb042060318996	C/T	2	20563177	1.33333	1.09051	0.101863	0.05	0.06	0.062069	0.312796	0.166667	0.806855	0.768227	0.0754248	0.259464	0.225803	9.4958e-53
snp_sb042060319005	C/T	2	20570555	1.5	1.10261	0.135415	0.0418651	0.0752773	0.0778804	0.431078	0.443855	0.610845	0.300262	0.582605	0.107685	0.101887	4.34064e-31
snp_sb042060319006	A/T	2	20573567	1.375	1.12001	0.123051	0.075	0.0750926	0.077682	0.128863	0.00123305	0.766837	0.766549	0.0761371	0.322332	0.270383	8.24722e-48
snp_sb042060319007	A/G	2	20573773	1.375	1.12001	0.123051	0.075	0.0750926	0.077682	0.128863	0.00123305	0.766837	0.766549	0.0761371	0.322332	0.270383	8.24722e-48
snp_sb042060319284	G/A	2	20707531	1.375	1.06165	0.092262	0.0168651	0.0490736	0.0507731	0.592777	0.656331	0.892958	0.688533	0.113091	0.157789	0.14534	2.26626e-64
snp_sb042060319312	A/G	2	20709519	1.375	1.06165	0.092262	0.0168651	0.0490736	0.0507731	0.592777	0.656331	0.892958	0.688533	0.113091	0.157789	0.14534	2.26626e-64
snp_sb042060319358	T/A	2	20713653	1.375	1.06165	0.092262	0.0168651	0.0490736	0.0507731	0.592777	0.656331	0.892958	0.688533	0.113091	0.157789	0.14534	2.26626e-64
snp_sb042060319439	A/G	2	20856568	1.33333	1.09545	0.109024	0.0555556	0.065	0.0672414	0.193925	0.145299	0.816617	0.785441	0.0682924	0.303598	0.257512	5.49125e-54
snp_sb042060319751	A/G	2	21219575	1.45833	1.10218	0.128356	0.0527778	0.0726852	0.0751916	0.334705	0.273885	0.856566	0.802464	0.0615405	0.368654	0.300701	3.24009e-59
snp_sb042060320336	A/T	2	21429050	1.58333	1.13419	0.167287	0.0583333	0.095463	0.0987548	0.439978	0.388943	0.864893	0.778896	0.0709672	0.432403	0.338917	2.48465e-60
snp_sb042060320337	C/T	2	21430190	1.33333	1.11714	0.116962	0.0722222	0.0724074	0.0749042	0.149282	0.00255754	0.774306	0.773727	0.0731114	0.320668	0.269254	1.03322e-48
snp_sb042060320991	T/C	2	21721128	1.41667	1.07977	0.103757	0.0168651	0.0568514	0.0588191	0.558174	0.703348	0.874312	0.576312	0.183793	0.134356	0.125331	8.18113e-62
snp_sb042060321702	A/C	2	22139081	1.41667	1.07977	0.103757	0.0168651	0.0568514	0.0588191	0.558174	0.703348	0.874312	0.576312	0.183793	0.134356	0.125331	8.18113e-62
snp_sb042060323419	C/A	2	23182313	1.58333	1.16055	0.181958	0.0418651	0.107314	0.111022	0.466196	0.609884	0.893336	0.726585	0.0940756	0.393095	0.315833	2.55393e-64
snp_sb042060323424	A/T	2	23185624	1.41667	1.13005	0.134364	0.0335317	0.0818514	0.0846812	0.340082	0.590334	0.804149	0.521925	0.228996	0.171476	0.156774	1.55185e-52
snp_sb042060334327	T/G	2	51764695	1.375	1.07914	0.0960592	0.0224206	0.0540736	0.0559455	0.345818	0.585368	0.843894	0.623507	0.150958	0.143823	0.13348	1.06101e-57
snp_sb042060334776	G/C	2	51993583	1.25	1.11949	0.113592	0.0305556	0.0734259	0.0759579	0.404279	0.583859	0.846983	0.632296	0.145385	0.200173	0.180138	5.99797e-58
snp_sb042060334864	A/T	2	52054412	1.54167	1.09978	0.132765	0.0418651	0.0723143	0.0748153	0.220276	0.421068	0.850352	0.741511	0.0871496	0.280247	0.240978	1.77593e-58
snp_sb042060335018	C/T	2	52123469	1.66667	1.18288	0.209383	0.0613095	0.123333	0.127593	0.369521	0.502894	0.871353	0.741208	0.0872874	0.476998	0.363235	2.95407e-61
snp_sb042060335548	T/A	2	52465000	1.125	1.0742	0.06704	0.0305556	0.044537	0.0460728	0.37521	0.313929	0.701796	0.565345	0.192208	0.102734	0.0974571	2.43422e-40
snp_sb042060336741	G/A	2	54390254	1.45833	1.10576	0.130433	0.0388889	0.0744444	0.0770115	0.470367	0.477612	0.847495	0.708061	0.103077	0.255585	0.222923	5.16383e-58
snp_sb042060336746	T/A	2	54390613	1.66667	1.29003	0.278359	0.1	0.177935	0.184084	0.471943	0.437996	0.777771	0.604578	0.163512	0.450462	0.349004	4.17471e-49
snp_sb042060337686	T/C	2	54582870	1.33333	1.12444	0.132802	0.0361111	0.0821296	0.0849617	0.466609	0.560316	0.842358	0.641465	0.139733	0.229611	0.20325	2.46105e-57
snp_sb042060337718	C/A	2	54593504	1.70833	1.21789	0.250381	0.0640873	0.149824	0.15501	0.510853	0.572249	0.868555	0.692707	0.110903	0.487834	0.368843	7.23317e-61
snp_sb042060338476	C/G	2	55292382	1.58333	1.16428	0.18561	0.055754	0.109916	0.113727	0.390902	0.49276	0.886818	0.776866	0.0718057	0.492827	0.371388	2.22625e-63
snp_sb042060338643	C/T	2	55384926	1.29167	1.04545	0.0717738	0.0194444	0.0376852	0.0389847	0.448515	0.484029	0.834074	0.67842	0.118503	0.117492	0.11059	2.97298e-56
snp_sb042060338644	C/T	2	55385652	1.41667	1.09114	0.12135	0.0361111	0.0686111	0.070977	0.347469	0.473684	0.857297	0.728865	0.0929989	0.253633	0.221468	2.53854e-59
snp_sb042060339135	C/T	2	55665363	1.54167	1.158	0.174258	0.0416667	0.104138	0.107743	0.429453	0.599891	0.824543	0.561477	0.195254	0.237743	0.209482	5.54632e-55
snp_sb042060339359	G/T	2	55788578	1.45833	1.11424	0.138872	0.0527778	0.0800642	0.0828392	0.444928	0.340807	0.871961	0.805763	0.0602648	0.41271	0.327545	2.74328e-61
snp_sb042060339961	G/C	2	55956451	1.41667	1.13139	0.147282	0.0638889	0.0891667	0.0922414	0.292535	0.283489	0.680056	0.553469	0.201697	0.200173	0.180138	5.60576e-38
snp_sb042060340754	T/A	2	56341054	1.45833	1.21534	0.197297	0.0833333	0.127593	0.131992	0.332497	0.34688	0.73399	0.592709	0.171792	0.313933	0.264656	6.01187e-44
snp_sb042060341062	A/C	2	56426380	1.54167	1.19859	0.204505	0.0722222	0.126667	0.131034	0.328788	0.429825	0.787234	0.626841	0.148825	0.340128	0.282284	2.71905e-50
snp_sb042060341126	C/T	2	56435486	1.54167	1.16056	0.186724	0.0666667	0.111111	0.114943	0.325253	0.4	0.816669	0.694449	0.109998	0.364336	0.297966	5.47612e-54
snp_sb042060342191	C/G	2	56956319	1.33333	1.1059	0.116982	0.05	0.0705556	0.0729885	0.379612	0.291339	0.735208	0.626348	0.149139	0.189291	0.171375	4.24921e-44
snp_sb042060342277	T/C	2	56976530	1.45833	1.1744	0.189514	0.0527778	0.117315	0.12136	0.511274	0.550118	0.826781	0.614967	0.156526	0.30534	0.258724	2.70196e-55
snp_sb042060342893	G/C	2	57166047	1.33333	1.13687	0.134825	0.0305556	0.0852778	0.0882184	0.474476	0.641694	0.749613	0.301192	0.580036	0.122349	0.114865	8.87675e-46
snp_sb042060343056	A/C	2	57253297	1.75	1.27304	0.285173	0.075	0.17599	0.182073	0.446648	0.57384	0.830947	0.603311	0.16438	0.444135	0.345507	8.19895e-56
snp_sb042060343660	T/C	2	57499457	1.58333	1.22083	0.225377	0.0722222	0.140527	0.145387	0.425146	0.486062	0.82429	0.658111	0.129875	0.411542	0.326859	5.94312e-55
snp_sb042060343720	G/A	2	57523267	1.5	1.185	0.203145	0.0640873	0.125092	0.129413	0.447932	0.487679	0.817093	0.642984	0.138812	0.350963	0.289376	4.14552e-54
snp_sb042060343983	A/G	2	57743637	1.29167	1.05904	0.0836399	0.0251984	0.0465736	0.0481869	0.280852	0.458955	0.87908	0.776506	0.0719551	0.208739	0.186953	2.10457e-62
snp_sb042060344169	G/A	2	57835616	1.70833	1.18675	0.23984	0.0751984	0.139453	0.144283	0.40003	0.460763	0.781694	0.595158	0.170056	0.344818	0.285368	1.17774e-49
snp_sb042060344776	G/A	2	58288533	1.41667	1.10196	0.121546	0.0305556	0.0702494	0.0726859	0.470334	0.565042	0.687737	0.282086	0.636256	0.097753	0.0929751	1.09806e-38
snp_sb042060344876	G/A	2	58352562	1.54167	1.17069	0.189419	0.0501984	0.114176	0.118133	0.463597	0.56034	0.662263	0.231823	0.828411	0.148509	0.137482	3.95728e-36
snp_sb042060345868	C/G	2	58860841	1.625	1.19356	0.218432	0.0920635	0.131175	0.135713	0.330386	0.298165	0.81319	0.733827	0.09068	0.492489	0.371216	1.38433e-53
snp_sb042060346132	A/G	2	58956882	1.5	1.13244	0.155444	0.05	0.0914815	0.094636	0.372768	0.453441	0.812402	0.656766	0.130653	0.26713	0.231451	1.88211e-53
snp_sb042060346344	C/T	2	59042458	1.33333	1.05601	0.07965	0.0222222	0.0431481	0.044636	0.258041	0.484979	0.862805	0.733613	0.0907792	0.162382	0.149198	4.56088e-60
snp_sb042060347453	T/C	2	59534953	1.5	1.11945	0.14955	0.0335317	0.0855551	0.0885126	0.54568	0.608068	0.665225	0.145833	1.46429	0.100248	0.0952227	1.4506e-36
snp_sb042060347623	G/A	2	59611177	1.5	1.10665	0.143769	0.0446429	0.0807403	0.0835317	0.370641	0.447081	0.847361	0.72394	0.0953325	0.292983	0.250064	4.48442e-58
snp_sb042060347744	G/T	2	59698705	1.54167	1.13181	0.170684	0.0501984	0.0977773	0.101156	0.445229	0.486605	0.782932	0.577191	0.183132	0.231656	0.204823	7.34462e-50
snp_sb042060347795	C/T	2	59753548	1.5	1.13682	0.166426	0.047619	0.0974717	0.100847	0.451829	0.511457	0.859154	0.711701	0.101271	0.338549	0.281241	1.03514e-59
snp_sb042060347797	A/C	2	59755843	1.41667	1.12424	0.138446	0.0305556	0.0828704	0.085728	0.519811	0.631285	0.808654	0.481047	0.2697	0.16009	0.147275	5.54969e-53
snp_sb042060347981	C/T	2	59810106	1.70833	1.19319	0.227781	0.0865079	0.133583	0.138203	0.321334	0.352402	0.706142	0.546233	0.20768	0.294772	0.251327	6.309e-41
snp_sb042060348072	T/G	2	59863446	1.75	1.24148	0.273391	0.0946429	0.164731	0.170432	0.435155	0.425471	0.787149	0.62952	0.147128	0.445062	0.346022	2.61784e-50
snp_sb042060348146	G/C	2	59907737	1.58333	1.19633	0.212464	0.0694444	0.129907	0.134387	0.379903	0.465431	0.811271	0.646952	0.136428	0.368654	0.300701	2.67516e-53
snp_sb042060348262	A/G	2	60105017	1.625	1.16022	0.195213	0.0531746	0.113027	0.116939	0.477795	0.529542	0.819371	0.616058	0.155806	0.294772	0.251327	1.70938e-54
snp_sb042060348282	T/C	2	60161743	1.54167	1.18065	0.205971	0.105556	0.124416	0.12872	0.287281	0.151592	0.757312	0.713948	0.100165	0.43544	0.340636	1.20479e-46
snp_sb042060348862	C/G	2	60374738	1.79167	1.24952	0.283388	0.0974206	0.170648	0.176539	0.421829	0.429112	0.778482	0.611977	0.158512	0.440348	0.343395	2.97068e-49
snp_sb042060348965	T/C	2	60383083	1.41667	1.12909	0.137855	0.0724206	0.0831477	0.0860222	0.137375	0.129012	0.675315	0.627222	0.148583	0.223431	0.19847	1.52392e-37
snp_sb042060348972	T/A	2	60384320	1.66667	1.15643	0.203393	0.0670635	0.115527	0.119525	0.373205	0.4195	0.765006	0.595186	0.170037	0.285752	0.244925	9.80279e-48
snp_sb042060348973	G/A	2	60384426	1.66667	1.15643	0.203393	0.0670635	0.115527	0.119525	0.373205	0.4195	0.765006	0.595186	0.170037	0.285752	0.244925	9.80279e-48
snp_sb042060349090	C/A	2	60408845	1.66667	1.15386	0.19761	0.0642857	0.112286	0.116173	0.344608	0.427485	0.77329	0.604011	0.1639	0.283925	0.243618	9.75903e-49
snp_sb042060349202	T/G	2	60415546	1.83333	1.25242	0.288673	0.105754	0.172592	0.178551	0.404067	0.387261	0.746905	0.586945	0.175934	0.418433	0.33089	1.75787e-45
snp_sb042060349216	G/T	2	60416638	1.83333	1.24937	0.284557	0.102976	0.170092	0.175965	0.405914	0.394586	0.752885	0.591824	0.172423	0.417304	0.330232	3.47547e-46
snp_sb042060349284	C/A	2	60450646	1.79167	1.18976	0.227695	0.0863095	0.130833	0.135352	0.329012	0.340307	0.703077	0.549908	0.204622	0.291187	0.248792	1.58015e-40
snp_sb042060349505	G/A	2	60492930	1.41667	1.09757	0.119313	0.0416667	0.0682407	0.0705939	0.347699	0.389417	0.759567	0.606225	0.162388	0.17373	0.158639	5.94519e-47
snp_sb042060349665	G/A	2	60530761	1.70833	1.15432	0.195254	0.0751984	0.110462	0.114279	0.245482	0.31924	0.711813	0.576668	0.183525	0.261392	0.227229	1.65777e-41
snp_sb042060349680	G/A	2	60542309	1.29167	1.06917	0.0832758	0.0335317	0.0477773	0.0494321	0.194875	0.298166	0.809153	0.728074	0.0933715	0.175976	0.160492	3.63524e-53
snp_sb042060349862	G/T	2	60679497	1.58333	1.14726	0.172327	0.072619	0.100712	0.104199	0.217553	0.278946	0.494971	0.299596	0.584458	0.143823	0.13348	5.14481e-21
snp_sb042060349917	A/C	2	60688802	1.75	1.22888	0.254849	0.0920635	0.152657	0.157935	0.371115	0.396925	0.662097	0.439699	0.31857	0.272798	0.235589	3.38069e-36
snp_sb042060350555	A/T	2	61014947	1.58333	1.15462	0.180071	0.0640873	0.105648	0.109298	0.375892	0.393387	0.672224	0.459662	0.293878	0.195843	0.176666	3.15729e-37
snp_sb042060350633	A/T	2	61090135	1.75	1.16598	0.22958	0.0700397	0.12889	0.133366	0.413679	0.456595	0.839415	0.704484	0.10487	0.436437	0.341199	4.3139e-57
snp_sb042060350636	A/G	2	61090285	1.70833	1.14119	0.201471	0.0704365	0.111214	0.115107	0.320186	0.366656	0.834713	0.739025	0.0882835	0.428099	0.336464	4.78134e-56
snp_sb042060351016	G/A	2	61434830	1.58333	1.11528	0.15245	0.0529762	0.0847217	0.0876505	0.282847	0.374704	0.457623	0.132608	1.63525	0.097753	0.0929751	3.65738e-18
snp_sb042060351059	A/T	2	61433471	1.16667	1.0738	0.0651303	0.0333333	0.0424074	0.0438697	0.147937	0.213974	0.682353	0.595882	0.169546	0.105213	0.0996784	3.13844e-38
snp_sb042060351176	T/G	2	61590154	1.625	1.17937	0.21574	0.0672619	0.127687	0.132121	0.423017	0.473227	0.857001	0.728537	0.0931533	0.470636	0.359887	2.02901e-59
snp_sb042060351645	G/C	2	62057584	1.25	1.09028	0.0955611	0.0361111	0.0587963	0.0608238	0.492793	0.385827	0.725666	0.553328	0.201812	0.131971	0.123262	5.21367e-43
snp_sb042060351649	A/C	2	62059111	1.20833	1.07203	0.0694141	0.0305556	0.0434259	0.0449234	0.151998	0.296375	0.701796	0.576189	0.183886	0.102734	0.0974571	2.43422e-40
snp_sb042060351929	C/G	2	62331830	1.20833	1.07468	0.0857676	0.0140873	0.0524164	0.0542442	0.627714	0.731242	0.900521	0.629858	0.146915	0.141468	0.131461	2.02338e-65
snp_sb042060352250	T/G	2	62458735	1.375	1.11491	0.117236	0.0585317	0.0712032	0.0736658	0.154814	0.177962	0.479651	0.367002	0.431196	0.112604	0.106264	8.66698e-20
snp_sb042060352254	T/C	2	62462895	1.25	1.07023	0.0850586	0.0166667	0.0501852	0.0519157	0.517842	0.667897	0.87988	0.638305	0.141662	0.139105	0.12943	2.13608e-62
snp_sb042060352338	A/T	2	62506582	1.5	1.13385	0.149603	0.0696429	0.0880551	0.0910988	0.176399	0.209099	0.768878	0.707774	0.10322	0.301848	0.256292	3.98882e-48
snp_sb042060352632	C/T	2	62716064	1.75	1.2336	0.261099	0.0779762	0.156583	0.162003	0.410744	0.502014	0.841918	0.682557	0.11627	0.493478	0.371718	2.72975e-57
snp_sb042060352653	A/G	2	62723139	1.625	1.2193	0.239625	0.05	0.147194	0.152284	0.564579	0.660312	0.899987	0.705573	0.104322	0.499903	0.374952	3.68448e-65
snp_sb042060353010	A/T	2	62794637	1.375	1.09183	0.119521	0.0309524	0.068768	0.0711534	0.423001	0.549901	0.821723	0.603915	0.163965	0.17373	0.158639	6.67098e-55
snp_sb042060353017	G/C	2	62795250	1.375	1.09183	0.119521	0.0309524	0.068768	0.0711534	0.423001	0.549901	0.821723	0.603915	0.163965	0.17373	0.158639	6.67098e-55
snp_sb042060353024	C/T	2	62795617	1.375	1.09183	0.119521	0.0309524	0.068768	0.0711534	0.423001	0.549901	0.821723	0.603915	0.163965	0.17373	0.158639	6.67098e-55
snp_sb042060353241	A/G	2	63340941	1.70833	1.20501	0.227756	0.0777778	0.135342	0.140023	0.366271	0.425324	0.833612	0.710466	0.101882	0.467873	0.358421	3.71674e-56
snp_sb042060353459	A/G	2	64003944	1.29167	1.06676	0.0766177	0.0277778	0.0438889	0.0454023	0.258995	0.367089	0.767772	0.63308	0.144895	0.119925	0.112734	6.15906e-48
snp_sb042060353745	T/C	2	64495840	1.375	1.05259	0.0874089	0.0313492	0.0449518	0.0465578	0.214197	0.302604	0.820431	0.742515	0.0866935	0.175477	0.160081	2.772e-54
snp_sb042060353793	T/A	2	64522908	1.54167	1.14331	0.163515	0.0531746	0.096593	0.0999498	0.247724	0.449498	0.722526	0.495962	0.254071	0.191483	0.17315	8.80099e-43
snp_sb042060353801	C/T	2	64526500	1.5	1.14044	0.157425	0.0503968	0.0939078	0.097172	0.271242	0.463337	0.733988	0.504321	0.245716	0.189291	0.171375	4.24921e-44
snp_sb042060353825	G/T	2	64543644	1.70833	1.19975	0.235028	0.0670635	0.139093	0.143915	0.414942	0.517851	0.818643	0.623858	0.150732	0.370078	0.301599	2.36553e-54
snp_sb042060353826	G/T	2	64543941	1.54167	1.15524	0.177507	0.0474206	0.105648	0.109298	0.407172	0.551144	0.762708	0.471342	0.2804	0.200173	0.180138	2.01474e-47
snp_sb042060354343	A/G	2	64742787	1.5	1.09966	0.127868	0.0559524	0.0713152	0.0738004	0.110269	0.215421	0.674113	0.584635	0.177617	0.171476	0.156774	1.8275e-37
snp_sb042060354354	T/C	2	64753826	1.41667	1.08524	0.105488	0.0446429	0.0590736	0.061118	0.109309	0.244284	0.716654	0.625063	0.149959	0.157789	0.14534	4.25599e-42
snp_sb042060354355	T/C	2	64756277	1.41667	1.08524	0.105488	0.0446429	0.0590736	0.061118	0.109309	0.244284	0.716654	0.625063	0.149959	0.157789	0.14534	4.25599e-42
snp_sb042060354434	T/C	2	64924115	1.58333	1.17872	0.19516	0.078373	0.117501	0.121584	0.259723	0.333004	0.489772	0.235037	0.813663	0.153165	0.141435	1.41831e-20
snp_sb042060354500	A/C	2	64929386	1.45833	1.14519	0.164161	0.0615079	0.099093	0.102536	0.345047	0.379291	0.488738	0.176326	1.16782	0.119925	0.112734	1.94626e-20
snp_sb042060354931	C/T	2	66448740	1.125	1.04826	0.0553592	0.0138889	0.0341667	0.0353448	0.689441	0.593496	0.857544	0.649559	0.134877	0.097753	0.0929751	2.31766e-59
snp_sb042060354944	G/A	2	66461822	1.625	1.13686	0.178624	0.0670635	0.100574	0.104069	0.262541	0.333196	0.776415	0.664692	0.126114	0.300091	0.255064	4.36764e-49
snp_sb042060354949	G/C	2	66465051	1.625	1.13686	0.178624	0.0670635	0.100574	0.104069	0.262541	0.333196	0.776415	0.664692	0.126114	0.300091	0.255064	4.36764e-49
snp_sb042060355037	A/G	2	66604649	1.41667	1.0774	0.10199	0.0472222	0.0558333	0.0577586	0.130957	0.154229	0.676113	0.617052	0.155152	0.14617	0.135487	1.45911e-37
snp_sb042060355039	G/A	2	66604865	1.41667	1.0774	0.10199	0.0472222	0.0558333	0.0577586	0.130957	0.154229	0.676113	0.617052	0.155152	0.14617	0.135487	1.45911e-37
snp_sb042060355081	G/A	2	66707059	1.58333	1.14799	0.171898	0.0640873	0.100194	0.103669	0.361705	0.360369	0.720762	0.56344	0.193703	0.229611	0.20325	1.74644e-42
snp_sb042060355220	A/C	2	66837918	1.375	1.10882	0.114205	0.0583333	0.0684259	0.0707854	0.162807	0.147497	0.654408	0.594615	0.17044	0.169214	0.154898	2.69982e-35
snp_sb042060355654	C/T	2	67040256	1.16667	1.0381	0.0483602	0.0222222	0.0277778	0.0287356	0.157247	0.2	0.766082	0.707602	0.103306	0.0952507	0.0907143	9.80279e-48
snp_sb042060355700	C/T	2	67051566	1.16667	1.0381	0.0483602	0.0222222	0.0277778	0.0287356	0.157247	0.2	0.766082	0.707602	0.103306	0.0952507	0.0907143	9.80279e-48
snp_sb042060355894	T/C	2	67121362	1.70833	1.20856	0.237054	0.0950397	0.141761	0.14668	0.289457	0.329577	0.549809	0.328497	0.511042	0.210861	0.18863	1.67706e-25
snp_sb042060355899	C/T	2	67121584	1.70833	1.20856	0.237054	0.0950397	0.141761	0.14668	0.289457	0.329577	0.549809	0.328497	0.511042	0.210861	0.18863	1.67706e-25
snp_sb042060355943	G/A	2	67128680	1.70833	1.17175	0.213722	0.0811508	0.12315	0.127427	0.285537	0.341039	0.689653	0.529036	0.222557	0.261392	0.227229	3.66444e-39
snp_sb042060356101	C/A	2	67228788	1.375	1.10875	0.118703	0.055754	0.0711106	0.0735701	0.223049	0.215955	0.665523	0.573395	0.185999	0.166945	0.153009	1.5475e-36
snp_sb042060356157	C/T	2	67268522	1.375	1.10559	0.117634	0.0585317	0.0700921	0.0725164	0.199592	0.164931	0.644006	0.573696	0.185771	0.164667	0.15111	2.53682e-34
snp_sb042060356169	G/A	2	67273146	1.625	1.16819	0.190411	0.0670635	0.112194	0.116077	0.278039	0.402254	0.865177	0.774449	0.0728103	0.497575	0.373785	1.86245e-60
snp_sb042060356270	G/T	2	67451670	1.125	1.05458	0.0539484	0.0138889	0.0341667	0.0353448	0.760766	0.593496	0.886188	0.720021	0.0972119	0.122349	0.114865	2.86718e-63
snp_sb042060356295	C/T	2	67455734	1.5	1.20426	0.208247	0.0668651	0.130555	0.135064	0.463584	0.48784	0.756138	0.523855	0.227231	0.274672	0.23695	1.30889e-46
snp_sb042060356421	T/G	2	67587065	1.58333	1.16157	0.187062	0.0751984	0.110565	0.114397	0.301524	0.319869	0.578133	0.379728	0.408367	0.178215	0.162335	6.55043e-28
snp_sb042060356865	A/G	2	67873020	1.66667	1.27921	0.259353	0.0865079	0.165435	0.171153	0.247487	0.477087	0.819535	0.654884	0.131747	0.478756	0.364152	2.17863e-54
snp_sb042060357167	T/C	2	68307604	1.20833	1.09215	0.0826702	0.0277778	0.0531481	0.0549808	0.381706	0.477352	0.735294	0.493529	0.256555	0.105213	0.0996784	4.10493e-44
snp_sb042060357168	T/G	2	68315642	1.20833	1.09215	0.0826702	0.0277778	0.0531481	0.0549808	0.381706	0.477352	0.735294	0.493529	0.256555	0.105213	0.0996784	4.10493e-44
snp_sb042060357288	G/A	2	68409008	1.16667	1.07211	0.070319	0.0333333	0.045	0.0465517	0.263559	0.259259	0.781818	0.705455	0.104381	0.153165	0.141435	1.22006e-49
snp_sb042060357347	A/C	2	68413852	1.25	1.10271	0.0990608	0.0555556	0.062963	0.0651341	0.168259	0.117647	0.72475	0.68805	0.113346	0.202326	0.181858	6.69698e-43
snp_sb042060357408	G/A	2	68471283	1.16667	1.07211	0.070319	0.0333333	0.045	0.0465517	0.263559	0.259259	0.781818	0.705455	0.104381	0.153165	0.141435	1.22006e-49
snp_sb042060357853	A/T	2	68919774	1.70833	1.22818	0.253655	0.0753968	0.15363	0.158954	0.515822	0.509231	0.781189	0.554146	0.201145	0.344818	0.285368	1.17774e-49
snp_sb042060357917	C/G	2	68949789	1.83333	1.2965	0.312686	0.11131	0.193703	0.20039	0.396945	0.425361	0.736411	0.541297	0.211853	0.422871	0.333461	2.93533e-44
snp_sb042060357920	T/G	2	68950671	1.83333	1.2965	0.312686	0.11131	0.193703	0.20039	0.396945	0.425361	0.736411	0.541297	0.211853	0.422871	0.333461	2.93533e-44
snp_sb042060357964	G/C	2	68979373	1.66667	1.22143	0.236042	0.0861111	0.144722	0.149713	0.357725	0.40499	0.760307	0.597161	0.168648	0.359948	0.295167	5.03606e-47
snp_sb042060358021	G/T	2	68993999	1.66667	1.22143	0.236042	0.0861111	0.144722	0.149713	0.357725	0.40499	0.760307	0.597161	0.168648	0.359948	0.295167	5.03606e-47
snp_sb042060358110	G/C	2	69031473	1.75	1.28435	0.297554	0.111508	0.185945	0.192383	0.360751	0.400317	0.736088	0.559914	0.196497	0.422871	0.333461	2.93533e-44
snp_sb042060358456	G/C	2	69155197	1.54167	1.13635	0.161375	0.0642857	0.0941856	0.0974594	0.220723	0.317457	0.49593	0.261483	0.706087	0.127175	0.119089	5.34009e-21
snp_sb042060358513	T/A	2	69179885	1.20833	1.07938	0.0785092	0.0335317	0.0492588	0.0509647	0.288077	0.319274	0.720072	0.588781	0.174606	0.119925	0.112734	1.61666e-42
snp_sb042060358711	G/A	2	69309355	1.58333	1.19391	0.217761	0.0617063	0.132316	0.13691	0.538033	0.533645	0.786774	0.542782	0.21059	0.289383	0.247512	1.95323e-50
snp_sb042060358929	A/C	2	69553623	1.66667	1.19459	0.219869	0.0753968	0.131223	0.135774	0.383355	0.425428	0.809281	0.668067	0.124214	0.395656	0.317384	3.78659e-53
snp_sb042060359046	G/C	2	69840986	1.66667	1.21563	0.233234	0.078373	0.142131	0.147063	0.365097	0.448586	0.566505	0.213847	0.919059	0.180446	0.164165	5.45388e-27
snp_sb042060359594	T/C	2	70229027	1.625	1.18759	0.220026	0.0753968	0.131223	0.135774	0.408602	0.425428	0.719675	0.512114	0.238172	0.269027	0.232839	2.00736e-42
snp_sb042060359675	A/T	2	70249124	1.5	1.11384	0.14476	0.0559524	0.0823791	0.0852338	0.298695	0.320794	0.533576	0.31328	0.548007	0.119925	0.112734	3.47234e-24
snp_sb042060359732	T/C	2	70270649	1.375	1.09832	0.117333	0.047619	0.0685828	0.0709618	0.304525	0.30567	0.674138	0.530681	0.221093	0.14617	0.135487	1.45911e-37
snp_sb042060359819	G/A	2	70303907	1.70833	1.24697	0.267172	0.0920635	0.164	0.169682	0.391647	0.438639	0.809724	0.661046	0.128188	0.484109	0.366928	3.56324e-53
snp_sb042060359920	A/C	2	70337130	1.79167	1.26233	0.285492	0.111706	0.173983	0.180014	0.317964	0.357946	0.757235	0.621893	0.151999	0.460425	0.354429	8.94236e-47
snp_sb042060360232	G/C	2	70456526	1.41667	1.1151	0.121233	0.0333333	0.072037	0.0745211	0.317084	0.537275	0.88	0.740667	0.0875338	0.278396	0.239644	2.08235e-62
snp_sb042060361246	A/G	2	73434346	1.25	1.13166	0.113695	0.0529762	0.0754625	0.078072	0.204605	0.29798	0.729052	0.614045	0.157136	0.195843	0.176666	1.75241e-43
snp_sb042060361380	T/C	2	73501014	1.625	1.16941	0.200867	0.072619	0.117797	0.121885	0.417061	0.383522	0.511963	0.208346	0.949927	0.148509	0.137482	2.80752e-22
snp_sb042060361449	T/C	2	73507971	1.625	1.16941	0.200867	0.072619	0.117797	0.121885	0.417061	0.383522	0.511963	0.208346	0.949927	0.148509	0.137482	2.80752e-22
snp_sb042060361451	G/T	2	73508085	1.625	1.16941	0.200867	0.072619	0.117797	0.121885	0.417061	0.383522	0.511963	0.208346	0.949927	0.148509	0.137482	2.80752e-22
snp_sb042060361574	G/C	2	73522581	1.625	1.16941	0.200867	0.072619	0.117797	0.121885	0.417061	0.383522	0.511963	0.208346	0.949927	0.148509	0.137482	2.80752e-22
snp_sb042060362036	C/T	2	74475070	1.41667	1.10086	0.135207	0	0.0768707	0.0795475	1	1	1	0.68465	0.11515	0.24376	0.21405	4.6487e-80
snp_sb042060362313	C/G	2	74702679	1.66667	1.32162	0.296639	0.0833333	0.191824	0.198452	0.51581	0.565573	0.81883	0.582968	0.17884	0.460425	0.354429	3.04235e-54
snp_sb042060362673	G/C	2	75804441	1.58333	1.17136	0.204836	0.0501984	0.121296	0.125486	0.572351	0.586149	0.852165	0.642782	0.138934	0.340128	0.282284	1.06058e-58
snp_sb042060362676	A/G	2	75804562	1.58333	1.17136	0.204836	0.0501984	0.121296	0.125486	0.572351	0.586149	0.852165	0.642782	0.138934	0.340128	0.282284	1.06058e-58
snp_sb042060362761	G/C	2	75838457	1.45833	1.18238	0.181547	0.0642857	0.114371	0.118341	0.406169	0.437918	0.754022	0.56238	0.194539	0.261392	0.227229	2.08549e-46
snp_sb042060362896	T/C	2	75891954	1.29167	1.11347	0.113829	0.0474206	0.0715736	0.074049	0.355766	0.337456	0.772441	0.656538	0.130786	0.208739	0.186953	1.36747e-48
snp_sb042060363157	G/C	2	75994759	1.20833	1.08311	0.0820948	0.0428571	0.052106	0.05395	0.107679	0.177501	0.751316	0.697648	0.108347	0.170064	0.155603	6.29268e-46
snp_sb042060363168	A/G	2	76006734	1.41667	1.12144	0.141858	0.0503968	0.084093	0.0870188	0.449616	0.400701	0.811297	0.685127	0.114896	0.26713	0.231451	1.88211e-53
snp_sb042060363513	T/C	2	76427071	1.25	1.07351	0.081115	0.030754	0.0487958	0.0504858	0.242716	0.369742	0.812953	0.703221	0.105507	0.164667	0.15111	1.17063e-53
snp_sb042060363515	C/G	2	76427351	1.25	1.07351	0.081115	0.030754	0.0487958	0.0504858	0.242716	0.369742	0.812953	0.703221	0.105507	0.164667	0.15111	1.17063e-53
snp_sb042060363531	G/A	2	76433611	1.20833	1.07422	0.0771023	0.030754	0.0478699	0.0495279	0.275489	0.357551	0.807609	0.700535	0.10687	0.16009	0.147275	5.54969e-53
snp_sb042060363644	G/C	2	76475272	1.54167	1.1331	0.173211	0.0559524	0.0996485	0.103111	0.421596	0.438503	0.697651	0.461532	0.291675	0.184884	0.167793	5.29544e-40
snp_sb042060363776	C/G	2	76673317	1.66667	1.17594	0.21711	0.072619	0.126268	0.130636	0.393874	0.424881	0.833797	0.711012	0.101612	0.437427	0.341756	2.64415e-56
snp_sb042060363872	C/T	2	76715878	1.25	1.03964	0.0620503	0.0140873	0.0328699	0.0340107	0.358876	0.571422	0.935025	0.848395	0.0446742	0.217181	0.193597	2.36483e-70
snp_sb042060363903	G/A	2	76734948	1.625	1.20591	0.227114	0.0617063	0.137687	0.142466	0.504515	0.551835	0.81326	0.583323	0.178579	0.330537	0.27591	9.5964e-54
snp_sb042060364056	T/C	2	76788530	1.20833	1.04066	0.0580352	0.0198413	0.0321013	0.0332223	0.226822	0.381917	0.859723	0.773045	0.0733965	0.141468	0.131461	5.49303e-60
snp_sb042060364194	A/G	2	76852019	1.25	1.03992	0.0611225	0.0251984	0.0324995	0.0336275	0.122033	0.224653	0.827367	0.777348	0.0716063	0.14617	0.135487	1.56984e-55
snp_sb042060364747	G/A	3	120241	1.29167	1.08146	0.090408	0.0390873	0.053518	0.0553708	0.213795	0.269643	0.697969	0.586461	0.176286	0.129577	0.121182	4.8258e-40
snp_sb042060365193	G/C	3	542076	1.45833	1.11	0.145865	0.0418651	0.0836106	0.0865011	0.435209	0.499285	0.817356	0.635232	0.143557	0.229611	0.20325	3.50026e-54
snp_sb042060365195	G/A	3	545337	1.16667	1.04136	0.0528067	0.0196429	0.0304625	0.0315203	0.148522	0.355179	0.869591	0.797759	0.0633777	0.150841	0.139464	3.78933e-61
snp_sb042060365258	A/G	3	556650	1.16667	1.04136	0.0528067	0.0196429	0.0304625	0.0315203	0.148522	0.355179	0.869591	0.797759	0.0633777	0.150841	0.139464	3.78933e-61
snp_sb042060365356	C/G	3	601262	1.375	1.09573	0.111343	0.0363095	0.0649069	0.0671524	0.33593	0.440591	0.810067	0.660476	0.128515	0.191483	0.17315	2.84816e-53
snp_sb042060365614	C/G	3	735239	1.625	1.16181	0.207822	0.0702381	0.120667	0.124854	0.34904	0.417918	0.856202	0.752959	0.0820232	0.488687	0.36928	2.33391e-59
snp_sb042060365758	C/T	3	799143	1.25	1.05551	0.0789242	0.0111111	0.0442593	0.0457854	0.669704	0.748954	0.894118	0.578235	0.18235	0.105213	0.0996784	2.25111e-64
snp_sb042060365774	C/T	3	801674	1.25	1.05551	0.0789242	0.0111111	0.0442593	0.0457854	0.669704	0.748954	0.894118	0.578235	0.18235	0.105213	0.0996784	2.25111e-64
snp_sb042060365811	A/C	3	809439	1.25	1.05551	0.0789242	0.0111111	0.0442593	0.0457854	0.669704	0.748954	0.894118	0.578235	0.18235	0.105213	0.0996784	2.25111e-64
snp_sb042060365825	A/T	3	812183	1.41667	1.07692	0.114846	0.0253968	0.0624717	0.06464	0.466578	0.593466	0.792472	0.489519	0.260705	0.122349	0.114865	2.7536e-51
snp_sb042060365833	C/A	3	886600	1.54167	1.22682	0.233531	0.0861111	0.146759	0.15182	0.398144	0.413249	0.780555	0.625999	0.149362	0.393095	0.315833	1.82637e-49
snp_sb042060366051	G/T	3	1000840	1.75	1.27463	0.282937	0.0700397	0.174824	0.180873	0.432134	0.59937	0.830117	0.575961	0.184057	0.41271	0.327545	6.84009e-56
snp_sb042060366056	A/C	3	1001553	1.75	1.27463	0.282937	0.0700397	0.174824	0.180873	0.432134	0.59937	0.830117	0.575961	0.184057	0.41271	0.327545	6.84009e-56
snp_sb042060366173	C/T	3	1060676	1.54167	1.12562	0.160698	0.0587302	0.0911754	0.0943335	0.28695	0.355855	0.781422	0.66067	0.128404	0.269027	0.232839	9.72916e-50
snp_sb042060366265	G/A	3	1099300	1.25	1.09406	0.0960578	0.0444444	0.0596296	0.0616858	0.241981	0.254658	0.699969	0.597458	0.168439	0.148509	0.137482	3.89006e-40
snp_sb042060366279	G/A	3	1103594	1.25	1.09406	0.0960578	0.0444444	0.0596296	0.0616858	0.241981	0.254658	0.699969	0.597458	0.168439	0.148509	0.137482	3.89006e-40
snp_sb042060366474	G/C	3	1251741	1.41667	1.16525	0.15963	0.0478175	0.10112	0.104627	0.299	0.527122	0.724838	0.418113	0.347925	0.17373	0.158639	3.2342e-43
snp_sb042060366503	G/A	3	1286695	1.54167	1.23862	0.23468	0.0694444	0.149324	0.154487	0.492737	0.53494	0.861027	0.701172	0.106546	0.499752	0.374876	8.78878e-60
snp_sb042060366504	T/C	3	1288894	1.5	1.18612	0.191449	0.05	0.118861	0.122973	0.433285	0.579339	0.794162	0.510681	0.239543	0.239756	0.211015	9.21376e-51
snp_sb042060366597	C/G	3	1457177	1.66667	1.32725	0.296062	0.0638889	0.192685	0.19933	0.531946	0.668429	0.865049	0.592995	0.171589	0.472626	0.360938	2.70625e-60
snp_sb042060366602	A/G	3	1457490	1.66667	1.3339	0.301965	0.0638889	0.196759	0.203544	0.584955	0.675294	0.864678	0.583248	0.178634	0.471307	0.360242	3.04563e-60
snp_sb042060366603	G/A	3	1457554	1.625	1.28432	0.258677	0.0613095	0.167592	0.173378	0.461956	0.634174	0.808336	0.47608	0.275122	0.317316	0.266971	9.17646e-53
snp_sb042060366918	A/G	3	1903996	1.375	1.12023	0.131363	0.0418651	0.0795366	0.0822865	0.381317	0.473637	0.78588	0.593208	0.171437	0.195843	0.176666	3.06108e-50
snp_sb042060366940	G/A	3	1905405	1.375	1.12023	0.131363	0.0418651	0.0795366	0.0822865	0.381317	0.473637	0.78588	0.593208	0.171437	0.195843	0.176666	3.06108e-50
snp_sb042060366987	C/T	3	1910168	1.625	1.13449	0.186317	0.0535714	0.104186	0.107804	0.427667	0.485808	0.861774	0.731179	0.0919138	0.387881	0.312655	3.57119e-60
snp_sb042060367078	G/C	3	1960808	1.54167	1.14158	0.158917	0.0474206	0.0930551	0.0962712	0.319639	0.490403	0.890702	0.78552	0.0682603	0.434436	0.340068	6.10123e-64
snp_sb042060367113	T/A	3	1980633	1.41667	1.12699	0.137075	0.0474206	0.0826847	0.0855432	0.352155	0.426488	0.793118	0.639272	0.14107	0.229611	0.20325	4.03339e-51
snp_sb042060367121	C/T	3	2013860	1.45833	1.14766	0.158172	0.0474206	0.0958329	0.0991448	0.375257	0.505174	0.865818	0.728831	0.0930152	0.353989	0.291335	1.55193e-60
snp_sb042060367165	G/C	3	2084347	1.58333	1.2039	0.225731	0.0589286	0.138335	0.143136	0.509381	0.574015	0.872843	0.701499	0.106379	0.462741	0.355676	1.54519e-61
snp_sb042060367704	G/A	3	2643187	1.33333	1.11793	0.119534	0.0527778	0.0739815	0.0765326	0.233643	0.286608	0.71036	0.593995	0.170879	0.182669	0.165985	2.7753e-41
snp_sb042060367794	G/A	3	2695335	1.41667	1.06455	0.0993142	0.0420635	0.0524717	0.0542951	0.111177	0.198358	0.681271	0.602405	0.165004	0.131971	0.123262	2.39714e-38
snp_sb042060367820	A/G	3	2713688	1.45833	1.10476	0.127824	0.0615079	0.0729346	0.0754637	0.105595	0.15667	0.621027	0.550623	0.204031	0.162382	0.149198	4.05477e-32
snp_sb042060367879	C/T	3	2745957	1.45833	1.12821	0.138018	0.0529762	0.081944	0.084777	0.262112	0.353507	0.52904	0.271516	0.670755	0.112604	0.106264	9.97309e-24
snp_sb042060368008	T/G	3	2967817	1.58333	1.18783	0.212167	0.0640873	0.127972	0.132405	0.460392	0.499208	0.730294	0.46144	0.291782	0.237743	0.209482	1.43428e-43
snp_sb042060368253	C/T	3	3287974	1.70833	1.2093	0.239576	0.0672619	0.142316	0.147255	0.382994	0.527377	0.764632	0.501996	0.248012	0.285752	0.244925	9.80279e-48
snp_sb042060368691	A/G	3	3720735	1.66667	1.19331	0.222692	0.0615079	0.132426	0.137019	0.383417	0.535531	0.772905	0.511065	0.239175	0.270917	0.234219	1.13872e-48
snp_sb042060368808	A/G	3	3769682	1.41667	1.16373	0.161954	0.0416667	0.101759	0.105268	0.455526	0.590537	0.82433	0.570975	0.187847	0.237743	0.209482	5.54632e-55
snp_sb042060369004	T/G	3	3860807	1.58333	1.12918	0.166474	0.0503968	0.0939078	0.097172	0.358044	0.463337	0.706471	0.453048	0.301818	0.171476	0.156774	5.49157e-41
snp_sb042060369109	A/G	3	3902411	1.25	1.06351	0.0777434	0.0277778	0.0451852	0.0467433	0.282597	0.385246	0.7998	0.674341	0.120732	0.139105	0.12943	7.21808e-52
snp_sb042060369202	T/G	3	3911244	1.16667	1.04844	0.0539928	0.0194444	0.0325	0.0336207	0.284346	0.401709	0.846711	0.743788	0.0861174	0.127175	0.119089	6.47271e-58
snp_sb042060369279	G/A	3	3941363	1.20833	1.05152	0.0604127	0.0224206	0.0353699	0.0365969	0.220069	0.36611	0.826754	0.726693	0.0940241	0.129577	0.121182	1.80394e-55
snp_sb042060369365	C/T	3	4003923	1.75	1.30725	0.301001	0.0861111	0.190435	0.197015	0.412683	0.547818	0.825026	0.613046	0.1578	0.491791	0.370862	5.28403e-55
snp_sb042060369922	C/T	3	4891568	1.625	1.14459	0.194885	0.0503968	0.110574	0.114413	0.455219	0.544227	0.850337	0.671627	0.12223	0.336962	0.28019	1.62253e-58
snp_sb042060370031	C/G	3	4949340	1.5	1.14408	0.160438	0.0642857	0.0960374	0.0993751	0.245596	0.330618	0.671988	0.509977	0.240218	0.195843	0.176666	3.15729e-37
snp_sb042060370087	A/G	3	5001434	1.75	1.28788	0.295103	0.0696429	0.185277	0.191674	0.449625	0.624116	0.85787	0.621878	0.152008	0.490301	0.370104	2.01893e-59
snp_sb042060370206	C/A	3	5058862	1.5	1.14339	0.161811	0.0644841	0.0962977	0.0996495	0.310644	0.330367	0.749704	0.62622	0.149221	0.257528	0.224368	5.66359e-46
snp_sb042060370460	T/G	3	5175500	1.58333	1.24787	0.248264	0.075	0.156389	0.161782	0.557711	0.520426	0.832285	0.650283	0.134448	0.447797	0.347536	5.41414e-56
snp_sb042060370633	G/A	3	5244497	1.54167	1.24951	0.242014	0.0777778	0.15463	0.159962	0.509589	0.497006	0.824262	0.650615	0.134252	0.4432	0.344987	5.94312e-55
snp_sb042060370635	A/G	3	5248094	1.70833	1.23591	0.262568	0.0781746	0.159093	0.164605	0.490691	0.508623	0.834255	0.662692	0.127249	0.47197	0.360592	2.40578e-56
snp_sb042060370878	G/A	3	5493645	1.45833	1.09984	0.125895	0.0392857	0.07113	0.0736088	0.325235	0.447691	0.609851	0.293603	0.601489	0.100248	0.0952227	5.41379e-31
snp_sb042060370968	T/C	3	5535752	1.75	1.28238	0.284777	0.0811508	0.177779	0.183941	0.428193	0.54353	0.800973	0.563986	0.193273	0.407993	0.324764	3.76736e-52
snp_sb042060371060	G/A	3	5587695	1.66667	1.26875	0.255357	0.0474206	0.162129	0.167727	0.487997	0.707513	0.883601	0.602036	0.165258	0.407993	0.324764	5.83921e-63
snp_sb042060371143	G/C	3	5617005	1.45833	1.19042	0.17993	0.0585317	0.114537	0.118493	0.351235	0.488969	0.782051	0.573511	0.185911	0.269027	0.232839	9.72916e-50
snp_sb042060371275	C/T	3	5787297	2	1.93896	0.6759	0.838095	0.483093	0.499804	-0.727637	-0.734852	-0.680459	0.0313531	7.72369	0.498743	0.374371	4.21133e-38
snp_sb042060371818	A/G	3	6263353	1.20833	1.08466	0.0824968	0.0388889	0.0525926	0.0544061	0.173068	0.260563	0.71972	0.620954	0.152606	0.139105	0.12943	2.46154e-42
snp_sb042060372193	C/A	3	6324453	1.54167	1.23132	0.227008	0.047619	0.144694	0.149697	0.469131	0.670898	0.880257	0.636151	0.142988	0.398185	0.318909	1.44908e-62
snp_sb042060372374	C/T	3	6373569	1.25	1.07602	0.0862003	0.05	0.0514815	0.0532567	-0.00220595	0.028777	0.741193	0.733525	0.09082	0.193667	0.174914	8.63049e-45
snp_sb042060372740	A/C	3	6735083	1.58333	1.1418	0.171223	0.0561508	0.0987977	0.102236	0.215174	0.431659	0.812876	0.670754	0.122715	0.300091	0.255064	1.03145e-53
snp_sb042060373307	C/T	3	6984385	1.58333	1.16843	0.190603	0.0728175	0.11362	0.117558	0.220944	0.359115	0.714907	0.555158	0.200323	0.255585	0.222923	5.38476e-42
snp_sb042060373397	G/A	3	7009305	1.25	1.05698	0.0745835	0.0224206	0.0427773	0.0442597	0.292888	0.475875	0.853405	0.720306	0.0970748	0.153165	0.141435	5.87271e-59
snp_sb042060373402	C/A	3	7010395	1.29167	1.0695	0.0909449	0.0224206	0.0524069	0.0542214	0.393904	0.572182	0.861719	0.676777	0.119398	0.162382	0.149198	4.56088e-60
snp_sb042060373843	T/C	3	7197690	1.25	1.09137	0.0958399	0.0166667	0.0590741	0.0611111	0.517842	0.717868	0.87988	0.574241	0.185357	0.139105	0.12943	2.13608e-62
snp_sb042060374024	T/C	3	7229580	1.625	1.22645	0.225656	0.0587302	0.140435	0.145291	0.372967	0.581797	0.827665	0.587915	0.175231	0.338549	0.281241	2.29563e-55
snp_sb042060374475	G/C	3	7551664	1.16667	1.07097	0.064384	0.0333333	0.0416667	0.0431034	0.119754	0.2	0.696587	0.620733	0.152749	0.110148	0.104082	9.07677e-40
snp_sb042060374576	T/C	3	7666794	1.41667	1.0999	0.12056	0.028373	0.0691756	0.0715814	0.353731	0.589841	0.802909	0.519478	0.231253	0.143823	0.13348	1.07779e-52
snp_sb042060374795	G/T	3	7775078	1.5	1.14815	0.155557	0.0561508	0.0934349	0.0966772	0.270422	0.399038	0.567259	0.27992	0.643113	0.129577	0.121182	3.40131e-27
snp_sb042060375200	C/T	3	7908783	1.5	1.16441	0.170439	0.0583333	0.105093	0.108716	0.254012	0.444934	0.754062	0.556922	0.198896	0.237743	0.209482	2.69964e-46
snp_sb042060375446	C/T	3	8002244	1.58333	1.21294	0.222503	0.0724206	0.137592	0.142344	0.377534	0.473657	0.788669	0.598492	0.167716	0.343262	0.284348	1.56476e-50
snp_sb042060375491	A/G	3	8012102	1.58333	1.21294	0.222503	0.0724206	0.137592	0.142344	0.377534	0.473657	0.788669	0.598492	0.167716	0.343262	0.284348	1.56476e-50
snp_sb042060375908	G/A	3	8104703	1.58333	1.25469	0.251221	0.0700397	0.159816	0.165358	0.392477	0.561749	0.845099	0.646549	0.136669	0.451335	0.349483	8.70762e-58
snp_sb042060375910	G/C	3	8109123	1.58333	1.25469	0.251221	0.0700397	0.159816	0.165358	0.392477	0.561749	0.845099	0.646549	0.136669	0.451335	0.349483	8.70762e-58
snp_sb042060376513	G/A	3	9052903	1.5	1.20385	0.190767	0.0529762	0.121018	0.125198	0.404894	0.562246	0.815459	0.578437	0.182199	0.287571	0.246223	6.43721e-54
snp_sb042060376545	A/G	3	9057564	1.75	1.37133	0.347676	0.0724206	0.225472	0.233267	0.59419	0.678804	0.850155	0.533477	0.218623	0.483609	0.36667	2.1765e-58
snp_sb042060376656	C/A	3	9109404	1.54167	1.09215	0.141676	0.0333333	0.0757596	0.0783981	0.412931	0.560012	0.89015	0.750335	0.0831844	0.303598	0.257512	8.68164e-64
snp_sb042060376744	C/T	3	9143602	1.66667	1.31726	0.300985	0.0585317	0.193898	0.200604	0.629425	0.698131	0.88216	0.609634	0.160082	0.496508	0.373248	1.01866e-62
snp_sb042060376797	A/G	3	9145660	1.66667	1.31726	0.300985	0.0585317	0.193898	0.200604	0.629425	0.698131	0.88216	0.609634	0.160082	0.496508	0.373248	1.01866e-62
snp_sb042060377268	A/C	3	9279321	1.66667	1.26513	0.272291	0.0527778	0.170435	0.176326	0.603873	0.690334	0.877718	0.605118	0.163143	0.430339	0.337743	5.24235e-62
snp_sb042060377443	G/T	3	9298779	1.66667	1.26513	0.272291	0.0527778	0.170435	0.176326	0.603873	0.690334	0.877718	0.605118	0.163143	0.430339	0.337743	5.24235e-62
snp_sb042060377449	T/A	3	9299869	1.66667	1.26513	0.272291	0.0527778	0.170435	0.176326	0.603873	0.690334	0.877718	0.605118	0.163143	0.430339	0.337743	5.24235e-62
snp_sb042060377527	T/C	3	9316102	1.66667	1.26513	0.272291	0.0527778	0.170435	0.176326	0.603873	0.690334	0.877718	0.605118	0.163143	0.430339	0.337743	5.24235e-62
snp_sb042060377721	C/T	3	9361277	1.375	1.12271	0.12518	0.0363095	0.0767588	0.079413	0.256122	0.526966	0.724515	0.417621	0.348628	0.131971	0.123262	5.21367e-43
snp_sb042060378422	A/C	3	9919418	1.16667	1.06044	0.0593247	0.030754	0.0371292	0.0384168	0.0937867	0.171703	0.700377	0.638266	0.141686	0.102734	0.0974571	2.43422e-40
snp_sb042060378432	G/A	3	9929229	1.25	1.1334	0.12596	0.0194444	0.0825	0.0853448	0.794081	0.76431	0.898204	0.568096	0.190066	0.191483	0.17315	6.05007e-65
snp_sb042060378852	A/G	3	10370193	1.29167	1.14144	0.124698	0.0305556	0.0815741	0.084387	0.515009	0.625426	0.846983	0.591491	0.17266	0.200173	0.180138	5.99797e-58
snp_sb042060378899	T/A	3	10494725	1.5	1.14486	0.162621	0.0392857	0.0970087	0.100368	0.366017	0.595029	0.841233	0.607955	0.161215	0.247732	0.217047	2.25212e-57
snp_sb042060379042	C/A	3	10559866	1.54167	1.19192	0.201858	0.0503968	0.124771	0.12911	0.455391	0.596087	0.89363	0.736651	0.0893738	0.473274	0.36128	2.28152e-64
snp_sb042060379134	T/C	3	10571017	1.5	1.18921	0.186083	0.0365079	0.116778	0.120831	0.432697	0.687374	0.843799	0.500358	0.249642	0.233692	0.206386	1.06517e-57
snp_sb042060379521	A/G	3	10718172	1.54167	1.22625	0.229343	0.0448413	0.144957	0.149991	0.599217	0.690657	0.893114	0.654473	0.131987	0.418433	0.33089	2.74202e-64
snp_sb042060379733	T/G	3	10777945	1.54167	1.2372	0.232048	0.047619	0.148568	0.153727	0.551421	0.679479	0.89112	0.660303	0.128614	0.436437	0.341199	5.1964e-64
snp_sb042060379819	T/C	3	10784436	1.54167	1.2372	0.232048	0.047619	0.148568	0.153727	0.551421	0.679479	0.89112	0.660303	0.128614	0.436437	0.341199	5.1964e-64
snp_sb042060379940	C/T	3	10836535	1.33333	1.13342	0.126702	0.0333333	0.0803704	0.0831418	0.389156	0.585253	0.774977	0.457443	0.296516	0.148509	0.137482	8.32481e-49
snp_sb042060380150	C/G	3	10921954	1.29167	1.09729	0.0993207	0.025	0.0610185	0.0631226	0.363411	0.590288	0.795138	0.499984	0.250016	0.122349	0.114865	2.7536e-51
snp_sb042060380199	A/G	3	10932720	1.33333	1.13342	0.126702	0.0333333	0.0803704	0.0831418	0.389156	0.585253	0.774977	0.457443	0.296516	0.148509	0.137482	8.32481e-49
snp_sb042060380477	T/A	3	11141789	1.375	1.11748	0.120244	0.0365079	0.0726568	0.0751764	0.300708	0.497529	0.837929	0.677453	0.119029	0.225499	0.200074	5.88359e-57
snp_sb042060380777	T/A	3	11358073	1.5	1.14241	0.164424	0.0418651	0.0974164	0.100796	0.395795	0.570246	0.834832	0.615669	0.156063	0.253633	0.221468	2.05974e-56
snp_sb042060381218	A/G	3	11592935	1.29167	1.12079	0.116936	0.0166667	0.0742593	0.0768199	0.552602	0.775561	0.922325	0.653913	0.132314	0.215082	0.191952	2.22209e-68
snp_sb042060381425	C/T	3	11703062	1.66667	1.2432	0.255134	0.0642857	0.157101	0.162533	0.529904	0.590801	0.85849	0.654177	0.132159	0.454749	0.351351	1.4159e-59
snp_sb042060382301	A/G	3	12145442	1.25	1.05348	0.0721715	0.030754	0.0408329	0.0422482	0.151136	0.246833	0.748343	0.665868	0.12545	0.122349	0.114865	8.87675e-46
snp_sb042060382362	G/T	3	12160398	1.33333	1.06917	0.0958296	0.028373	0.0536201	0.0554894	0.343689	0.470851	0.789082	0.601401	0.165696	0.134356	0.125331	5.50578e-51
snp_sb042060382582	A/G	3	12239063	1.41667	1.17185	0.175534	0.0367063	0.110557	0.114401	0.553454	0.667987	0.897677	0.691809	0.111372	0.356984	0.293265	5.32968e-65
snp_sb042060382755	A/G	3	12302191	1.25	1.07978	0.0885707	0.0196429	0.0536106	0.0554666	0.481248	0.633602	0.86096	0.620524	0.152885	0.141468	0.131461	5.49303e-60
snp_sb042060383100	G/A	3	12463030	1.58333	1.18981	0.208953	0.0666667	0.127037	0.131418	0.390996	0.475219	0.849367	0.712961	0.10065	0.4432	0.344987	3.0335e-58
snp_sb042060383352	T/C	3	12621009	1.5	1.12286	0.158498	0.053373	0.0909349	0.094091	0.344784	0.413063	0.66679	0.43229	0.328316	0.16009	0.147275	7.30768e-37
snp_sb042060383926	G/A	3	12834564	1.20833	1.0869	0.082035	0.0194444	0.0525	0.0543103	0.383521	0.62963	0.898204	0.725152	0.0947553	0.191483	0.17315	6.05007e-65
snp_sb042060384040	T/C	3	12866372	1.41667	1.09016	0.128299	0.0367063	0.0716756	0.0741676	0.410881	0.487883	0.73186	0.476409	0.274759	0.136735	0.127386	4.1959e-44
snp_sb042060384491	A/C	3	13181064	1.70833	1.18123	0.225963	0.0638889	0.131361	0.135904	0.364948	0.513637	0.871149	0.735072	0.0901027	0.496027	0.373006	3.66503e-61
snp_sb042060385030	G/A	3	13415059	1.58333	1.18511	0.203092	0.0589286	0.122972	0.127233	0.373043	0.520797	0.777657	0.536014	0.216405	0.265225	0.230053	2.34062e-49
snp_sb042060385035	C/T	3	13416579	1.58333	1.18511	0.203092	0.0589286	0.122972	0.127233	0.373043	0.520797	0.777657	0.536014	0.216405	0.265225	0.230053	2.34062e-49
snp_sb042060385209	A/G	3	13494213	1.625	1.26252	0.265424	0.0617063	0.167872	0.173692	0.537141	0.63242	0.875922	0.662447	0.127389	0.497172	0.373582	5.71978e-62
snp_sb042060385211	C/G	3	13494361	1.70833	1.24001	0.269425	0.0672619	0.163798	0.169477	0.538234	0.58936	0.863278	0.667053	0.124783	0.492144	0.371041	2.95647e-60
snp_sb042060385747	A/C	3	13766985	1.25	1.0606	0.0716868	0.0251984	0.0415736	0.0430145	0.240025	0.393884	0.900477	0.835802	0.0491141	0.253633	0.221468	2.29767e-65
snp_sb042060385789	T/C	3	13769800	1.58333	1.23047	0.232685	0.0503968	0.145389	0.150429	0.525828	0.653366	0.898962	0.708516	0.10285	0.498879	0.374439	3.93872e-65
snp_sb042060387145	C/T	3	15909212	1.375	1.11757	0.122284	0.0305556	0.0743519	0.0769157	0.390929	0.589041	0.823683	0.570961	0.187858	0.17373	0.158639	6.67098e-55
snp_sb042060387475	A/G	3	16377571	1.45833	1.10668	0.139447	0.0392857	0.0790457	0.0817856	0.439234	0.503	0.856792	0.711854	0.101196	0.274672	0.23695	1.98585e-59
snp_sb042060387546	G/A	3	16424519	1.25	1.10175	0.100572	0.0361111	0.0639815	0.0661877	0.322989	0.435601	0.744087	0.546576	0.207393	0.141468	0.131461	3.94423e-45
snp_sb042060391562	C/G	3	20260094	1.625	1.26797	0.254982	0.0420635	0.162657	0.16828	0.599825	0.741397	0.908395	0.64577	0.137135	0.459637	0.354004	1.72679e-66
snp_sb042060391563	T/A	3	20261452	1.79167	1.28891	0.296133	0.0837302	0.183305	0.18964	0.377658	0.543219	0.81669	0.598691	0.167577	0.457228	0.352699	4.42271e-54
snp_sb042060392253	C/T	3	20523022	1.625	1.27102	0.259098	0.0448413	0.165157	0.170866	0.597362	0.728493	0.902176	0.639699	0.140809	0.458842	0.353574	1.31818e-65
snp_sb042060393124	G/A	3	20982936	1.625	1.27424	0.262438	0.047619	0.167472	0.173261	0.572671	0.715659	0.900458	0.64992	0.134663	0.478756	0.364152	2.34894e-65
snp_sb042060403884	G/T	3	45957944	1.20833	1.08805	0.08797	0.025	0.0558333	0.0577586	0.419135	0.552239	0.879944	0.731876	0.091588	0.208739	0.186953	2.10457e-62
snp_sb042060405478	C/T	3	46832653	1.54167	1.28552	0.261821	0.0472222	0.171574	0.17749	0.646026	0.724771	0.894823	0.617856	0.154625	0.449581	0.34852	1.87274e-64
snp_sb042060405751	T/A	3	46955839	1.33333	1.11276	0.125385	0.0361111	0.0763889	0.079023	0.429992	0.527273	0.887736	0.762519	0.0778608	0.322332	0.270383	1.78012e-63
snp_sb042060406631	A/G	3	47366448	1.33333	1.11276	0.125385	0.0361111	0.0763889	0.079023	0.429992	0.527273	0.887736	0.762519	0.0778608	0.322332	0.270383	1.78012e-63
snp_sb042060407603	G/C	3	47880622	1.16667	1.02762	0.0424158	0.00853175	0.0226847	0.0234743	0.389527	0.623899	0.912651	0.767751	0.0756264	0.097753	0.0929751	2.91434e-67
snp_sb042060407631	C/G	3	47898823	1.25	1.12274	0.110602	0.0305556	0.0721296	0.0746169	0.337375	0.57638	0.836279	0.613519	0.157485	0.187091	0.16959	1.54118e-56
snp_sb042060407741	C/G	3	47921310	1.70833	1.27092	0.271445	0.0390873	0.17	0.175869	0.575915	0.770074	0.915299	0.631617	0.14581	0.461977	0.355265	2.04654e-67
snp_sb042060409287	T/C	3	48609125	1.66667	1.24128	0.249629	0.0335317	0.154814	0.16016	0.600585	0.783407	0.926839	0.66222	0.127518	0.458842	0.353574	4.40853e-69
snp_sb042060410370	A/C	3	50549895	1.5	1.15373	0.161831	0.030754	0.0976847	0.10106	0.398904	0.685171	0.900236	0.683117	0.11597	0.3088	0.261122	2.60157e-65
snp_sb042060410892	C/G	3	50688078	1.25	1.06747	0.075845	0.025	0.0450926	0.0466475	0.204187	0.445585	0.756015	0.559923	0.19649	0.102734	0.0974571	1.55612e-46
snp_sb042060410896	G/C	3	50689129	1.66667	1.22532	0.240437	0.05	0.146638	0.151709	0.537332	0.659025	0.894221	0.689776	0.112437	0.47197	0.360592	2.50695e-64
snp_sb042060411170	G/A	3	50771776	1.625	1.22614	0.229678	0.0531746	0.142286	0.147207	0.438996	0.626285	0.849583	0.597508	0.168405	0.353989	0.291335	2.01811e-58
snp_sb042060411215	A/G	3	50805199	1.625	1.22331	0.228932	0.047619	0.141546	0.146441	0.470996	0.663578	0.868599	0.609417	0.160228	0.362881	0.29704	5.56811e-61
snp_sb042060411218	A/G	3	50807061	1.41667	1.1465	0.151942	0.0416667	0.094537	0.0977969	0.321497	0.559256	0.866269	0.696579	0.108897	0.31223	0.263486	1.57569e-60
snp_sb042060411232	G/A	3	50812647	1.41667	1.1465	0.151942	0.0416667	0.094537	0.0977969	0.321497	0.559256	0.866269	0.696579	0.108897	0.31223	0.263486	1.57569e-60
snp_sb042060411448	G/C	3	51262232	1.25	1.08782	0.0925356	0.025	0.0569161	0.0588928	0.515946	0.560757	0.843764	0.644307	0.138014	0.16009	0.147275	1.75598e-57
snp_sb042060411696	T/C	3	51430565	1.25	1.04994	0.0687711	0.0111111	0.0381481	0.0394636	0.562388	0.708738	0.924992	0.742473	0.0867125	0.148509	0.137482	9.11267e-69
snp_sb042060411821	T/G	3	51504411	1.45833	1.12398	0.152167	0.0309524	0.0885828	0.0916515	0.622595	0.650582	0.821723	0.489787	0.260426	0.17373	0.158639	6.67098e-55
snp_sb042060411830	T/A	3	51505971	1.58333	1.20701	0.227411	0.0587302	0.139138	0.14395	0.536541	0.577901	0.815644	0.563239	0.193861	0.318996	0.268117	5.29222e-54
snp_sb042060411834	G/A	3	51506181	1.5	1.16026	0.183952	0.047619	0.110249	0.114065	0.561657	0.568079	0.822775	0.589681	0.173958	0.269027	0.232839	6.0107e-55
snp_sb042060412004	A/C	3	51532416	1.54167	1.14334	0.171164	0.0503968	0.0997865	0.103242	0.439066	0.494953	0.859223	0.721259	0.0966163	0.35847	0.29422	1.03429e-59
snp_sb042060412495	A/G	3	51794236	1.20833	1.11322	0.104567	0.0222222	0.0687037	0.0710728	0.508447	0.67655	0.849984	0.536202	0.216242	0.148509	0.137482	2.38318e-58
snp_sb042060412555	C/T	3	51833072	1.29167	1.06022	0.0781929	0.0361111	0.043768	0.0452913	0.191949	0.174942	0.767652	0.718386	0.0980023	0.155481	0.143394	7.3312e-48
snp_sb042060412766	T/C	3	51927446	1.54167	1.16395	0.192089	0.047619	0.114741	0.118724	0.511737	0.584987	0.890803	0.736882	0.0892673	0.436437	0.341199	5.1964e-64
snp_sb042060412908	C/T	3	51959651	1.45833	1.10049	0.130506	0.0279762	0.0737032	0.0762521	0.373299	0.620421	0.92701	0.807709	0.0595174	0.383889	0.310204	4.00346e-69
snp_sb042060413086	T/C	3	52239302	1.29167	1.08717	0.0986756	0.0416667	0.059537	0.06159	0.230866	0.300156	0.848991	0.784225	0.068786	0.276538	0.238301	3.27647e-58
snp_sb042060413088	T/A	3	52239476	1.29167	1.08717	0.0986756	0.0416667	0.059537	0.06159	0.230866	0.300156	0.848991	0.784225	0.068786	0.276538	0.238301	3.27647e-58
snp_sb042060413175	C/A	3	52262555	1.625	1.14149	0.187224	0.0587302	0.105852	0.109528	0.301072	0.445168	0.88207	0.787449	0.0674807	0.498122	0.374059	9.02252e-63
snp_sb042060413285	G/A	3	52322589	1.125	1.04183	0.0479137	0.0138889	0.0289815	0.0299808	0.405764	0.520767	0.894487	0.779829	0.0705829	0.131971	0.123262	2.00187e-64
snp_sb042060413524	C/T	3	52485065	1.54167	1.21224	0.222156	0.0640873	0.139537	0.144356	0.414471	0.540713	0.847841	0.668706	0.123857	0.421773	0.332827	4.19325e-58
snp_sb042060414119	C/A	3	52778335	1.125	1.05153	0.0498324	0.0222222	0.0316667	0.0327586	0.320244	0.298246	0.814218	0.73526	0.0900158	0.119925	0.112734	1.08517e-53
snp_sb042060414123	C/A	3	52780287	1.70833	1.21792	0.25292	0.072619	0.152009	0.157264	0.38756	0.52227	0.850343	0.686734	0.114042	0.485564	0.367678	1.80919e-58
snp_sb042060414147	C/T	3	52797623	1.54167	1.13863	0.173214	0.0559524	0.100342	0.103816	0.330137	0.442383	0.762368	0.573844	0.185658	0.235721	0.207939	1.89397e-47
snp_sb042060414874	T/C	3	53110413	1.75	1.21699	0.257606	0.072619	0.152935	0.158222	0.436698	0.525163	0.842123	0.667514	0.124524	0.460425	0.354429	2.17169e-57
snp_sb042060415082	G/A	3	53177980	1.58333	1.13185	0.169032	0.0559524	0.0960828	0.0994101	0.29503	0.417665	0.697136	0.479915	0.270926	0.184884	0.167793	5.29544e-40
snp_sb042060415270	C/T	3	53266051	1.20833	1.02701	0.0474272	0.00833333	0.023768	0.0246017	0.578818	0.649388	0.918951	0.768837	0.0751664	0.102734	0.0974571	7.41715e-68
snp_sb042060416097	G/C	3	53631588	1.625	1.18941	0.218056	0.0670635	0.130712	0.135234	0.421456	0.486939	0.681646	0.379501	0.40876	0.210861	0.18863	2.67071e-38
snp_sb042060416175	G/A	3	53970498	1.375	1.14336	0.152581	0.0444444	0.0946296	0.0978927	0.462891	0.530333	0.889904	0.765587	0.0765467	0.404373	0.322614	9.00908e-64
snp_sb042060416635	C/A	3	54087333	1.66667	1.21962	0.230057	0.0837302	0.140527	0.145387	0.294064	0.404171	0.768019	0.610657	0.159395	0.361419	0.296107	4.59513e-48
snp_sb042060417420	C/G	3	54448249	1.45833	1.09073	0.127521	0.030754	0.0709349	0.0734013	0.38675	0.566448	0.796273	0.530097	0.221611	0.150841	0.139464	1.65706e-51
snp_sb042060417458	C/G	3	54481644	1.375	1.13804	0.138675	0.0422924	0.0862001	0.0892398	0.325527	0.509369	0.879129	0.753642	0.0817224	0.349686	0.288546	5.51968e-61
snp_sb042060418099	G/A	3	54652426	1.04167	1.04167	0.0288811	0.00277778	0.0208333	0.0215517	0.866667	0.866667	0.976296	0.822222	0.0540541	0.117492	0.11059	2.13918e-76
snp_sb042060418232	C/G	3	54709671	1.33333	1.07736	0.0905343	0.025	0.0517593	0.0535441	0.280907	0.516995	0.920626	0.835667	0.0491623	0.315628	0.265818	3.93518e-68
snp_sb042060418257	A/G	3	54718299	1.70833	1.19251	0.225669	0.0640873	0.132409	0.137006	0.406608	0.515989	0.821871	0.631974	0.145586	0.359948	0.295167	1.07847e-54
snp_sb042060418288	T/C	3	54726366	1.16667	1.04503	0.0527033	0.0222222	0.0312963	0.0323755	0.227077	0.289941	0.766082	0.670565	0.12282	0.0952507	0.0907143	9.80279e-48
snp_sb042060418297	T/A	3	54727724	1.33333	1.04876	0.0794333	0.0168651	0.0412127	0.0426542	0.431474	0.590779	0.847218	0.626652	0.148946	0.110148	0.104082	3.98568e-58
snp_sb042060418893	G/A	3	54994888	1.29167	1.06176	0.0879857	0.0277778	0.0488889	0.0505747	0.281544	0.431818	0.887612	0.802198	0.0616438	0.247732	0.217047	1.83662e-63
snp_sb042060418894	T/C	3	54995064	1.625	1.1251	0.17338	0.0611111	0.0964531	0.0997932	0.260978	0.366417	0.85216	0.766661	0.0760896	0.41387	0.328226	1.29727e-58
snp_sb042060418903	C/G	3	55002049	1.625	1.10476	0.156833	0.05	0.0842309	0.0871495	0.254124	0.406394	0.876933	0.792679	0.0653861	0.406794	0.324053	5.71052e-62
snp_sb042060419372	T/C	3	55191488	1.29167	1.07338	0.0907334	0.0305556	0.0530556	0.0548851	0.308126	0.424084	0.701796	0.482209	0.268447	0.102734	0.0974571	2.43422e-40
snp_sb042060419400	G/A	3	55200715	1.20833	1.06459	0.0744386	0.0277778	0.0451852	0.0467433	0.238273	0.385246	0.707602	0.524366	0.226766	0.0952507	0.0907143	5.55129e-41
snp_sb042060419934	A/G	3	55459735	1.66667	1.23458	0.246227	0.0805556	0.151916	0.157169	0.415398	0.469737	0.822675	0.665591	0.125606	0.454749	0.351351	9.71439e-55
snp_sb042060419935	T/G	3	55459977	1.66667	1.21399	0.235037	0.0805556	0.142472	0.147399	0.372409	0.434585	0.809765	0.663549	0.126762	0.423961	0.334089	4.31756e-53
snp_sb042060420063	A/G	3	55545771	1.41667	1.14854	0.151219	0.0666667	0.0942593	0.0975096	0.150601	0.292731	0.73027	0.618631	0.154118	0.247732	0.217047	1.5842e-43
snp_sb042060420337	T/C	3	55722771	1.29167	1.07494	0.0854945	0.0277778	0.05	0.0517241	0.403317	0.444444	0.859375	0.746875	0.084728	0.198012	0.178408	1.32676e-59
snp_sb042060420429	C/A	3	55891218	1.29167	1.09665	0.109724	0.0333333	0.0666667	0.0689655	0.47952	0.5	0.721326	0.442653	0.314777	0.119925	0.112734	1.61666e-42
snp_sb042060420516	G/A	3	55901567	1.29167	1.09665	0.109724	0.0333333	0.0666667	0.0689655	0.47952	0.5	0.721326	0.442653	0.314777	0.119925	0.112734	1.61666e-42
snp_sb042060420739	C/T	3	56075316	1.41667	1.04817	0.0821402	0.0224206	0.0409255	0.042344	0.251607	0.452159	0.81283	0.658349	0.129738	0.119925	0.112734	1.08517e-53
snp_sb042060421233	G/T	3	56272775	1.58333	1.20187	0.217786	0.0388889	0.133305	0.137916	0.51865	0.708271	0.918805	0.721675	0.0964162	0.479326	0.364449	7.45928e-68
snp_sb042060421331	G/A	3	56282622	1.5	1.18653	0.192743	0.0361111	0.120093	0.124234	0.441503	0.699306	0.924124	0.747663	0.0843751	0.476397	0.36292	1.26519e-68
snp_sb042060421455	A/G	3	56322246	1.45833	1.11255	0.140283	0.0388889	0.0805745	0.0833789	0.413636	0.517355	0.825994	0.639475	0.140946	0.223431	0.19847	3.87084e-55
snp_sb042060422034	A/T	3	56554344	1.625	1.25964	0.263268	0.0555556	0.165945	0.171693	0.567701	0.665217	0.842271	0.528863	0.222712	0.35248	0.290359	2.7314e-57
snp_sb042060422443	A/G	3	56681275	1.66667	1.27047	0.275004	0.0809524	0.172149	0.178111	0.474335	0.529753	0.818341	0.613695	0.157368	0.445981	0.346532	2.72936e-54
snp_sb042060422447	A/G	3	56681929	1.66667	1.27047	0.275004	0.0809524	0.172149	0.178111	0.474335	0.529753	0.818341	0.613695	0.157368	0.445981	0.346532	2.72936e-54
snp_sb042060422525	G/C	3	56723645	1.125	1.03419	0.046268	0.00833333	0.0267593	0.027682	0.62963	0.688581	0.942844	0.816464	0.0561983	0.14617	0.135487	2.24623e-71
snp_sb042060422563	C/T	3	56758868	1.54167	1.18853	0.200934	0.053373	0.123157	0.127424	0.339922	0.566627	0.893245	0.753666	0.0817119	0.499938	0.374969	2.22445e-64
snp_sb042060422569	C/G	3	56759334	1.54167	1.18853	0.200934	0.053373	0.123157	0.127424	0.339922	0.566627	0.893245	0.753666	0.0817119	0.499938	0.374969	2.22445e-64
snp_sb042060423263	A/G	3	57047937	1.54167	1.23356	0.240259	0.0779762	0.152139	0.157405	0.442021	0.487466	0.826593	0.661668	0.127833	0.448693	0.34803	3.13128e-55
snp_sb042060423280	T/C	3	57049683	1.54167	1.23356	0.240259	0.0779762	0.152139	0.157405	0.442021	0.487466	0.826593	0.661668	0.127833	0.448693	0.34803	3.13128e-55
snp_sb042060423325	C/T	3	57065511	1.625	1.26968	0.266049	0.0779762	0.169176	0.17503	0.46574	0.539081	0.84403	0.661611	0.127865	0.499965	0.374983	1.4641e-57
snp_sb042060423382	A/C	3	57144595	1.58333	1.1862	0.205482	0.0779762	0.124909	0.129247	0.279213	0.375735	0.843864	0.749888	0.0833833	0.499344	0.374672	1.55305e-57
snp_sb042060423474	G/C	3	57189215	1.625	1.24543	0.244352	0.0779762	0.153065	0.158363	0.383715	0.490567	0.843747	0.693281	0.110604	0.499127	0.374563	1.58549e-57
snp_sb042060423563	T/C	3	57252943	1.625	1.24906	0.255823	0.0833333	0.160556	0.166092	0.50797	0.480969	0.824213	0.661317	0.128033	0.474546	0.361949	6.1498e-55
snp_sb042060423696	A/G	3	57321253	1.58333	1.24127	0.249877	0.0613095	0.157872	0.163347	0.50995	0.61165	0.87685	0.682889	0.116092	0.497948	0.373972	5.38304e-62
snp_sb042060423861	C/A	3	57360848	1.625	1.25932	0.270246	0.0724206	0.169916	0.175796	0.567239	0.573787	0.852513	0.65396	0.132286	0.490685	0.370299	1.12204e-58
snp_sb042060423965	C/G	3	57378751	1.16667	1.06534	0.0654526	0.0111111	0.0412963	0.0427203	0.426938	0.730942	0.951057	0.818095	0.0555879	0.227559	0.201667	1.36802e-72
snp_sb042060424136	G/A	3	57472718	1.58333	1.29653	0.273376	0.0700397	0.178403	0.184595	0.51354	0.607407	0.837586	0.586304	0.1764	0.430339	0.337743	8.54935e-57
snp_sb042060424138	T/C	3	57475422	1.33333	1.16441	0.151461	0.0311508	0.0987316	0.102183	0.547899	0.68449	0.892359	0.658834	0.129458	0.287571	0.246223	2.7752e-64
snp_sb042060424140	T/C	3	57475625	1.33333	1.16441	0.151461	0.0311508	0.0987316	0.102183	0.547899	0.68449	0.892359	0.658834	0.129458	0.287571	0.246223	2.7752e-64
snp_sb042060424141	C/A	3	57477398	1.58333	1.29653	0.273376	0.0700397	0.178403	0.184595	0.51354	0.607407	0.837586	0.586304	0.1764	0.430339	0.337743	8.54935e-57
snp_sb042060424586	A/G	3	57815945	1.5	1.19867	0.202595	0.0531746	0.126175	0.13054	0.511652	0.578566	0.854434	0.654593	0.131917	0.365783	0.298885	4.58648e-59
snp_sb042060424659	T/C	3	57841842	1.375	1.16276	0.163209	0.030754	0.103527	0.107118	0.611376	0.702939	0.909067	0.693892	0.110287	0.338549	0.281241	1.51585e-66
snp_sb042060424678	G/A	3	57857787	1.29167	1.11385	0.111522	0.0390873	0.0699995	0.0724206	0.380503	0.441606	0.814317	0.66747	0.124549	0.210861	0.18863	8.39223e-54
snp_sb042060424823	A/G	3	57944386	1.625	1.34865	0.313182	0.103571	0.207188	0.214381	0.437936	0.500109	0.789462	0.578832	0.181904	0.491791	0.370862	1.04531e-50
snp_sb042060424826	G/A	3	57944510	1.625	1.34865	0.313182	0.103571	0.207188	0.214381	0.437936	0.500109	0.789462	0.578832	0.181904	0.491791	0.370862	1.04531e-50
snp_sb042060424831	T/C	3	57944770	1.66667	1.35848	0.327544	0.123016	0.215059	0.222523	0.35359	0.427989	0.75109	0.56485	0.192595	0.494099	0.372032	4.65508e-46
snp_sb042060424852	G/T	3	57953230	1.29167	1.13089	0.116272	0.0446429	0.0751847	0.0777846	0.317164	0.406224	0.59429	0.316728	0.53932	0.110148	0.104082	1.63215e-29
snp_sb042060424905	G/T	3	57962982	1.16667	1.07674	0.0713898	0.0251984	0.046018	0.0476122	0.400671	0.452423	0.765769	0.572241	0.186879	0.107685	0.101887	7.13996e-48
snp_sb042060425239	C/T	3	58236900	1.54167	1.1984	0.217179	0.0617063	0.133435	0.138056	0.430799	0.537555	0.82323	0.61775	0.154695	0.349439	0.288385	4.95852e-55
snp_sb042060425698	A/G	3	58425082	1.33333	1.12764	0.121852	0.0555556	0.0772222	0.0798851	0.186411	0.280576	0.82817	0.761157	0.0784474	0.323989	0.271504	1.79068e-55
snp_sb042060425728	C/T	3	58432583	1.45833	1.14734	0.166206	0.0555556	0.100556	0.104023	0.322932	0.447514	0.860676	0.747823	0.0843037	0.399438	0.319663	9.1409e-60
snp_sb042060425837	T/C	3	58737640	1.08333	1.04637	0.0450132	0	0.0296296	0.0306513	1	1	1	0.75229	0.0823186	0.119925	0.112734	4.6487e-80
snp_sb042060425919	A/C	3	58780971	1.54167	1.08559	0.131748	0.0390873	0.0699995	0.0724206	0.265974	0.441606	0.841945	0.716947	0.098701	0.247732	0.217047	2.25212e-57
snp_sb042060426210	A/C	3	59140536	1.16667	1.10352	0.0917879	0.0194444	0.0613889	0.0635057	0.681587	0.683258	0.85743	0.549885	0.20464	0.136735	0.127386	2.40856e-59
snp_sb042060426250	G/T	3	59174712	1.16667	1.10352	0.0917879	0.0194444	0.0613889	0.0635057	0.681587	0.683258	0.85743	0.549885	0.20464	0.136735	0.127386	2.40856e-59
snp_sb042060426251	T/C	3	59174817	1.16667	1.10352	0.0917879	0.0194444	0.0613889	0.0635057	0.681587	0.683258	0.85743	0.549885	0.20464	0.136735	0.127386	2.40856e-59
snp_sb042060426592	T/C	3	59472033	1.375	1.08657	0.107687	0.0446429	0.0611106	0.0632252	0.237487	0.269475	0.822307	0.75676	0.0803559	0.251674	0.220004	8.25454e-55
snp_sb042060427006	A/G	3	59666485	1.125	1.02804	0.0384079	0.0138889	0.0217593	0.0225096	0.204802	0.361702	0.898164	0.840457	0.0474572	0.136735	0.127386	6.10689e-65
snp_sb042060427214	A/G	3	59702744	1.20833	1.04365	0.0611891	0.0168651	0.0342588	0.0354475	0.315474	0.507715	0.914687	0.8267	0.0524071	0.198012	0.178408	2.04017e-67
snp_sb042060427294	G/A	3	59723489	1.16667	1.0665	0.06645	0.0138889	0.0417593	0.0431992	0.403602	0.667406	0.915443	0.745766	0.0852257	0.164667	0.15111	2.16183e-67
snp_sb042060427424	T/C	3	59804941	1.45833	1.19586	0.183162	0.0696429	0.117129	0.121175	0.335191	0.405418	0.706559	0.506474	0.243609	0.237743	0.209482	6.26299e-41
snp_sb042060427535	C/A	3	60065903	1.16667	1.05839	0.0646477	0.0111111	0.0398148	0.0411877	0.463602	0.72093	0.939754	0.784118	0.0688294	0.184884	0.167793	6.41353e-71
snp_sb042060427705	G/T	3	60155423	1.375	1.09204	0.111005	0.0337302	0.0636754	0.0658852	0.251564	0.470279	0.839881	0.69773	0.108305	0.210861	0.18863	3.14989e-57
snp_sb042060427879	G/A	3	60240156	1.41667	1.2261	0.200039	0.0805556	0.131546	0.136096	0.38955	0.387623	0.834725	0.730109	0.0924148	0.486949	0.368389	2.91381e-56
snp_sb042060428017	G/A	3	60282169	1.375	1.11868	0.126977	0.025	0.0771296	0.0797893	0.46947	0.67587	0.921465	0.757705	0.0799437	0.318996	0.268117	2.97971e-68
snp_sb042060428154	T/C	3	60329506	1.125	1.03142	0.0412242	0.0166667	0.0238889	0.0247126	0.190557	0.302326	0.875633	0.821741	0.0542321	0.134356	0.125331	8.18113e-62
snp_sb042060428418	C/G	3	60472707	1.29167	1.13312	0.113439	0.0555556	0.0740741	0.0766284	0.220142	0.25	0.612737	0.483649	0.266904	0.143823	0.13348	3.75386e-31
snp_sb042060428547	C/T	3	60491863	1.54167	1.16745	0.171675	0.0753968	0.104138	0.107743	0.155781	0.275993	0.565735	0.400192	0.374701	0.17373	0.158639	6.26419e-27
snp_sb042060428585	T/C	3	60501386	1.29167	1.13312	0.113439	0.0555556	0.0740741	0.0766284	0.220142	0.25	0.612737	0.483649	0.266904	0.143823	0.13348	3.75386e-31
snp_sb042060428699	G/A	3	60568861	1.375	1.06866	0.0978274	0.0337302	0.0534902	0.0553488	0.235003	0.369414	0.833137	0.735384	0.0899584	0.202326	0.181858	2.37453e-56
snp_sb042060429023	G/A	3	60716547	1.75	1.26308	0.268502	0.103175	0.165667	0.171406	0.296992	0.377217	0.792628	0.667023	0.1248	0.497377	0.373685	5.33886e-51
snp_sb042060429109	G/A	3	60767448	1.33333	1.08805	0.0995629	0.0222222	0.0585185	0.0605364	0.420126	0.620253	0.83984	0.578245	0.182343	0.139105	0.12943	5.23086e-57
snp_sb042060429232	C/A	3	60811994	1.29167	1.10344	0.0988493	0.0444444	0.0614815	0.0636015	0.272731	0.277108	0.532164	0.352827	0.458564	0.0952507	0.0907143	6.65211e-24
snp_sb042060429340	G/T	3	60899140	1.66667	1.17077	0.20563	0.072619	0.119649	0.1238	0.351232	0.393064	0.798919	0.668696	0.123862	0.361419	0.296107	7.51759e-52
snp_sb042060429648	C/T	3	61024800	1.25	1.08171	0.0855678	0.00833333	0.0521296	0.0539272	0.593444	0.840142	0.931713	0.572824	0.186434	0.122349	0.114865	9.61823e-70
snp_sb042060429843	C/T	3	61204511	1.16667	1.07402	0.0685001	0.00833333	0.0441667	0.0456897	0.473522	0.811321	0.914527	0.546991	0.207046	0.097753	0.0929751	2.91434e-67
snp_sb042060429880	C/G	3	61242845	1.25	1.13832	0.115353	0.05	0.0772222	0.0798851	0.266713	0.352518	0.722222	0.570988	0.187838	0.180446	0.164165	1.29124e-42
snp_sb042060430002	A/C	3	61276860	1.58333	1.13916	0.173315	0.0642857	0.0991383	0.102571	0.313573	0.351555	0.760746	0.631034	0.146175	0.269027	0.232839	3.11028e-47
snp_sb042060430089	A/T	3	61338504	1.58333	1.13916	0.173315	0.0642857	0.0991383	0.102571	0.313573	0.351555	0.760746	0.631034	0.146175	0.269027	0.232839	3.11028e-47
snp_sb042060430426	A/G	3	61476913	1.54167	1.12577	0.169188	0.0450397	0.0962127	0.0995507	0.410127	0.531874	0.76743	0.503189	0.246831	0.193667	0.174914	3.39874e-48
snp_sb042060430444	G/C	3	61478954	1.29167	1.09398	0.104649	0.0474206	0.0636106	0.0658114	0.308689	0.254517	0.559203	0.40871	0.361681	0.107685	0.101887	2.52931e-26
snp_sb042060430521	G/T	3	61516620	1.20833	1.07384	0.0704734	0.00833333	0.0443519	0.0458812	0.37931	0.812109	0.914527	0.545091	0.208639	0.097753	0.0929751	2.91434e-67
snp_sb042060430625	G/T	3	61559885	1.29167	1.10154	0.101889	0.0390873	0.0627773	0.0649494	0.430911	0.377366	0.673694	0.475927	0.275291	0.119925	0.112734	1.96342e-37
snp_sb042060430638	T/A	3	61560860	1.29167	1.10154	0.101889	0.0390873	0.0627773	0.0649494	0.430911	0.377366	0.673694	0.475927	0.275291	0.119925	0.112734	1.96342e-37
snp_sb042060430804	T/C	3	61825036	1.5	1.18367	0.185875	0.05	0.116111	0.120115	0.344846	0.569378	0.896943	0.760679	0.0786536	0.485564	0.367678	9.60685e-65
snp_sb042060430885	G/C	3	61870375	1.66667	1.22965	0.241832	0.0751984	0.148796	0.153934	0.348739	0.49462	0.797254	0.598824	0.167485	0.371494	0.30249	1.36181e-51
snp_sb042060430973	T/C	3	61915476	1.58333	1.25056	0.233385	0.0753968	0.149509	0.154678	0.377798	0.495703	0.818107	0.639314	0.141044	0.415022	0.328901	2.80112e-54
snp_sb042060431130	C/G	3	62017451	1.58333	1.13005	0.170562	0.0561508	0.0960275	0.0993591	0.389173	0.415263	0.800784	0.659307	0.129186	0.28209	0.242302	3.25804e-52
snp_sb042060431205	C/G	3	62057515	1.20833	1.06959	0.0728699	0.0113095	0.0446292	0.0461754	0.463622	0.746589	0.89722	0.594414	0.170582	0.110148	0.104082	4.86384e-65
snp_sb042060431263	G/A	3	62078609	1.20833	1.06959	0.0728699	0.0113095	0.0446292	0.0461754	0.463622	0.746589	0.89722	0.594414	0.170582	0.110148	0.104082	4.86384e-65
snp_sb042060431549	G/C	3	62201822	1.58333	1.13769	0.17272	0.0617063	0.0988053	0.102233	0.301971	0.375475	0.783876	0.653938	0.132299	0.285752	0.244925	4.19159e-50
snp_sb042060431576	G/T	3	62238543	1.29167	1.09431	0.106892	0.0390873	0.0642588	0.0664819	0.470598	0.391721	0.806489	0.681871	0.116638	0.202326	0.181858	8.21656e-53
snp_sb042060431741	T/C	3	62320176	1.625	1.17154	0.201091	0.047619	0.11941	0.123577	0.364022	0.601215	0.893789	0.733662	0.0907563	0.447797	0.347536	2.14397e-64
snp_sb042060431746	C/G	3	62320669	1.625	1.17154	0.201091	0.047619	0.11941	0.123577	0.364022	0.601215	0.893789	0.733662	0.0907563	0.447797	0.347536	2.14397e-64
snp_sb042060431898	A/G	3	62362913	1.20833	1.07924	0.0831419	0.0196429	0.0515736	0.0533593	0.439749	0.61913	0.832629	0.560556	0.195986	0.117492	0.11059	2.97298e-56
snp_sb042060432018	C/G	3	62393643	1.33333	1.10128	0.114317	0.0281746	0.0684902	0.070866	0.426301	0.588633	0.790292	0.490218	0.259978	0.134356	0.125331	5.50578e-51
snp_sb042060432081	G/A	3	62401822	1.20833	1.08274	0.0855539	0.0224206	0.053518	0.0553708	0.430519	0.581064	0.81283	0.553224	0.201896	0.119925	0.112734	1.08517e-53
snp_sb042060432176	T/A	3	62430521	1.66667	1.22603	0.239419	0.0531746	0.146633	0.151738	0.48253	0.637362	0.887571	0.68997	0.112335	0.472626	0.360938	1.58525e-63
snp_sb042060432448	A/C	3	62544647	1.41667	1.13321	0.143129	0.0363095	0.0862032	0.0891831	0.484809	0.578792	0.83253	0.602406	0.165003	0.217181	0.193597	3.75636e-56
snp_sb042060432706	C/G	3	63102404	1.33333	1.11509	0.115262	0.030754	0.071018	0.0734743	0.406925	0.566956	0.890069	0.746144	0.0850559	0.280247	0.240978	6.79136e-64
snp_sb042060432845	A/T	3	63307844	1.45833	1.13318	0.141825	0.0363095	0.0847217	0.0876505	0.360618	0.571426	0.86847	0.693098	0.110699	0.276538	0.238301	6.41638e-61
snp_sb042060432979	A/C	3	63399704	1.54167	1.14859	0.169165	0.0450397	0.0993608	0.102807	0.464503	0.546706	0.808832	0.57827	0.182324	0.235721	0.207939	2.81486e-53
snp_sb042060433039	A/G	3	63448439	1.54167	1.15842	0.17866	0.0478175	0.10612	0.1098	0.436012	0.549402	0.798764	0.553402	0.201751	0.237743	0.209482	5.30902e-52
snp_sb042060433060	G/A	3	63493020	1.16667	1.07741	0.0781382	0.0166667	0.0498148	0.0515326	0.727982	0.665428	0.848293	0.546566	0.207402	0.110148	0.104082	3.98568e-58
snp_sb042060433132	A/T	3	63631249	1.33333	1.15549	0.15605	0.0309524	0.0997411	0.103207	0.68193	0.689673	0.921047	0.745581	0.0853089	0.390504	0.314257	2.85886e-68
snp_sb042060433212	C/G	3	63802770	1.125	1.00882	0.0185986	0.00853175	0.00824027	0.00853175	-0.0353342	-0.0353724	0.946627	0.94845	0.0135879	0.16009	0.147275	4.13558e-72
snp_sb042060433337	A/G	3	63989880	1.41667	1.0611	0.097768	0.0339286	0.0510275	0.0528074	0.156473	0.335092	0.828638	0.742277	0.0868014	0.198012	0.178408	6.99687e-56
snp_sb042060433542	T/C	3	64137710	1.45833	1.0833	0.123348	0.0420635	0.0671013	0.0694292	0.213215	0.373134	0.802302	0.684624	0.115164	0.212976	0.190296	2.23219e-52
snp_sb042060433558	G/T	3	64155846	1.45833	1.0833	0.123348	0.0420635	0.0671013	0.0694292	0.213215	0.373134	0.802302	0.684624	0.115164	0.212976	0.190296	2.23219e-52
snp_sb042060433709	C/T	3	64406309	1.125	1.05911	0.0533724	0.0138889	0.0347222	0.0359195	0.439426	0.6	0.876335	0.690839	0.111879	0.112604	0.106264	6.54468e-62
snp_sb042060433710	T/C	3	64406562	1.125	1.05911	0.0533724	0.0138889	0.0347222	0.0359195	0.439426	0.6	0.876335	0.690839	0.111879	0.112604	0.106264	6.54468e-62
snp_sb042060434109	A/T	3	64646981	1.5	1.10579	0.139868	0.0503968	0.0781198	0.0808277	0.275665	0.354878	0.823407	0.726264	0.0942275	0.285752	0.244925	5.09827e-55
snp_sb042060434166	C/T	3	64677628	1.54167	1.19448	0.206143	0.0446429	0.126666	0.131041	0.520536	0.647555	0.902251	0.722655	0.0959466	0.457228	0.352699	1.47364e-65
snp_sb042060434280	C/A	3	64830003	1.33333	1.08331	0.0990042	0.0224206	0.0568514	0.0588191	0.481057	0.605627	0.832909	0.576312	0.183793	0.134356	0.125331	2.88617e-56
snp_sb042060434574	C/T	3	65457769	1.33333	1.07377	0.0871019	0.0194444	0.0493519	0.0510536	0.40298	0.606004	0.904674	0.758053	0.0797924	0.204472	0.183567	7.40588e-66
snp_sb042060434584	T/C	3	65470900	1.20833	1.05905	0.0606017	0.0166667	0.0362963	0.0375479	0.251665	0.540816	0.875633	0.729157	0.0928617	0.134356	0.125331	8.18113e-62
snp_sb042060434673	A/G	3	65617000	1.375	1.1038	0.115712	0.0224206	0.0683329	0.0706965	0.50167	0.671891	0.875551	0.620707	0.152766	0.180446	0.164165	6.16072e-62
snp_sb042060434769	A/G	3	65706545	1.79167	1.25192	0.278423	0.0728175	0.168435	0.174263	0.377609	0.567682	0.854151	0.662635	0.127281	0.499344	0.374672	5.10568e-59
snp_sb042060434808	A/G	3	65842681	1.45833	1.14848	0.16435	0.0390873	0.0998143	0.103264	0.420992	0.6084	0.904885	0.757112	0.0802022	0.411542	0.326859	6.0857e-66
snp_sb042060434818	C/A	3	65858748	1.625	1.17191	0.211642	0.0674603	0.123908	0.128207	0.343812	0.45556	0.86152	0.745647	0.0852792	0.487395	0.368618	4.46282e-60
snp_sb042060435124	T/G	3	66010382	1.45833	1.09823	0.126605	0.0363095	0.0715736	0.074049	0.236411	0.492697	0.758941	0.524822	0.226352	0.150841	0.139464	5.27283e-47
snp_sb042060435272	T/A	3	66110512	1.41667	1.09515	0.119415	0.0279762	0.0672217	0.0695471	0.477703	0.583822	0.858481	0.659956	0.128813	0.198012	0.178408	1.32676e-59
snp_sb042060435321	G/A	3	66138429	1.66667	1.18715	0.217199	0.0503968	0.12849	0.132935	0.480197	0.607777	0.865537	0.657178	0.130414	0.372902	0.303374	1.92184e-60
snp_sb042060435412	G/C	3	66322247	1.5	1.17551	0.189765	0.0450397	0.116213	0.12024	0.494142	0.612437	0.883362	0.699047	0.10763	0.386558	0.311845	4.56868e-63
snp_sb042060435551	G/C	3	66358225	1.41667	1.15046	0.157042	0.0394841	0.0969534	0.100317	0.500113	0.592752	0.894792	0.741662	0.0870806	0.375695	0.305122	1.14381e-64
snp_sb042060435693	C/G	3	66409697	1.5	1.13568	0.154462	0.0396825	0.0907596	0.0939153	0.384615	0.562773	0.903496	0.77928	0.0708088	0.411542	0.326859	6.0857e-66
snp_sb042060435703	C/A	3	66410437	1.5	1.13568	0.154462	0.0396825	0.0907596	0.0939153	0.384615	0.562773	0.903496	0.77928	0.0708088	0.411542	0.326859	6.0857e-66
snp_sb042060435788	T/G	3	66417157	1.45833	1.10235	0.127941	0.0396825	0.0722411	0.0747583	0.328671	0.450693	0.847036	0.721533	0.0964845	0.259464	0.225803	2.57029e-58
snp_sb042060436057	C/T	3	66848967	1.66667	1.2322	0.235253	0.0561508	0.145287	0.150317	0.365534	0.613517	0.887608	0.709192	0.102514	0.499531	0.374765	1.37046e-63
snp_sb042060436221	C/T	3	67543054	1.25	1.05315	0.0734713	0.0196429	0.0412032	0.0426314	0.29099	0.523269	0.901708	0.79382	0.0649328	0.200173	0.180138	1.4423e-65
snp_sb042060436373	G/C	3	67637500	1.29167	1.09445	0.10226	0.0251984	0.061944	0.0640873	0.354012	0.593206	0.891986	0.734476	0.0903789	0.233692	0.206386	3.50595e-64
snp_sb042060436727	G/C	3	67924538	1.45833	1.20724	0.201586	0.0644841	0.12889	0.133366	0.437625	0.499698	0.753392	0.507082	0.243017	0.261392	0.227229	2.08549e-46
snp_sb042060436779	T/A	3	67939218	1.375	1.14374	0.137732	0.0277778	0.0866667	0.0896552	0.545666	0.679487	0.921039	0.753641	0.0817229	0.35248	0.290359	3.44453e-68
snp_sb042060436956	C/T	3	68036501	1.45833	1.11005	0.126163	0.0251984	0.0728699	0.07539	0.334743	0.6542	0.933554	0.807847	0.0594644	0.379827	0.307693	4.44438e-70
snp_sb042060437001	A/G	3	68058566	1.625	1.18915	0.222074	0.0563492	0.132611	0.13721	0.417789	0.575081	0.881089	0.720157	0.0971467	0.473274	0.36128	9.86246e-63
snp_sb042060437236	C/G	3	68196869	1.5	1.13489	0.161018	0.0450397	0.0943608	0.097635	0.391132	0.522687	0.737427	0.449894	0.305687	0.171476	0.156774	1.13203e-44
snp_sb042060437396	A/T	3	68247995	1.25	1.05659	0.0760339	0.0335317	0.0429625	0.0444513	0.136167	0.219511	0.766532	0.700869	0.1067	0.143823	0.13348	6.4031e-48
snp_sb042060437602	G/A	3	68398083	1.54167	1.20334	0.191613	0.0611111	0.121111	0.125287	0.286342	0.495413	0.87625	0.75475	0.0812355	0.494099	0.372032	7.28596e-62
snp_sb042060437654	C/A	3	68433644	1.25	1.0501	0.0693552	0.0168651	0.0387032	0.0400452	0.297148	0.564246	0.914687	0.804218	0.0608611	0.198012	0.178408	2.04017e-67
snp_sb042060438239	G/C	3	68740794	1.625	1.16538	0.20093	0.0674603	0.117426	0.121502	0.31262	0.425509	0.805095	0.660735	0.128367	0.346366	0.286381	8.879e-53
snp_sb042060438298	T/C	3	68782851	1.70833	1.16074	0.206456	0.0702381	0.117519	0.121597	0.293571	0.402325	0.797967	0.661969	0.127661	0.347906	0.287387	7.04815e-52
snp_sb042060438559	C/A	3	69147113	1.66667	1.18111	0.21378	0.0638889	0.125435	0.129774	0.366345	0.49066	0.7826	0.573173	0.186168	0.291187	0.248792	2.01541e-49
snp_sb042060438613	C/T	3	69204457	1.16667	1.04436	0.0571765	0.0113095	0.0333329	0.0344896	0.462963	0.660709	0.921256	0.767916	0.0755563	0.143823	0.13348	2.05536e-68
snp_sb042060438681	T/C	3	69241567	1.16667	1.04765	0.0614783	0.0142857	0.0359902	0.0372453	0.452991	0.603066	0.902241	0.753716	0.0816901	0.14617	0.135487	7.22148e-66
snp_sb042060438909	T/G	3	69374745	1.5	1.20014	0.194525	0.0811508	0.122602	0.12685	0.219362	0.338093	0.784564	0.674521	0.120633	0.37708	0.305986	3.9253e-50
snp_sb042060439133	C/A	3	69536402	1.16667	1.06577	0.061869	0.00853175	0.0393514	0.0407157	0.448183	0.783191	0.916879	0.616616	0.155439	0.102734	0.0974571	7.41715e-68
snp_sb042060439256	A/G	3	69629501	1.5	1.14399	0.161606	0.0700397	0.0962977	0.0996495	0.20525	0.272676	0.852381	0.797039	0.063661	0.473914	0.361617	9.17646e-59
snp_sb042060439289	T/A	3	69637559	1.5	1.14399	0.161606	0.0700397	0.0962977	0.0996495	0.20525	0.272676	0.852381	0.797039	0.063661	0.473914	0.361617	9.17646e-59
snp_sb042060439348	C/A	3	69658114	1.29167	1.1028	0.1081	0.028373	0.0667682	0.069091	0.311514	0.575052	0.842788	0.630044	0.146798	0.180446	0.164165	8.91067e-58
snp_sb042060439477	G/C	3	69764576	1.54167	1.15448	0.171486	0.0668651	0.102777	0.106329	0.187122	0.349418	0.619436	0.415041	0.352351	0.175976	0.160492	7.11826e-32
snp_sb042060439651	C/T	3	69857837	1.45833	1.1262	0.136058	0.0501984	0.0809255	0.0837233	0.210394	0.379696	0.612112	0.374681	0.417234	0.129577	0.121182	3.42915e-31
snp_sb042060439658	T/C	3	69858871	1.45833	1.1262	0.136058	0.0501984	0.0809255	0.0837233	0.210394	0.379696	0.612112	0.374681	0.417234	0.129577	0.121182	3.42915e-31
snp_sb042060440118	A/G	3	70069906	1.45833	1.13923	0.160591	0.0480159	0.0967782	0.100141	0.352247	0.503856	0.818924	0.635034	0.14368	0.265225	0.230053	1.27028e-54
snp_sb042060440168	G/A	3	70105666	1.5	1.12752	0.147555	0.0561508	0.0863979	0.0893975	0.191408	0.35009	0.55065	0.308597	0.560119	0.124766	0.116983	9.91279e-26
snp_sb042060440632	A/C	3	70241479	1.29167	1.07255	0.0860921	0.0363095	0.0499069	0.0516352	0.254015	0.272455	0.810067	0.73894	0.0883223	0.191483	0.17315	2.84816e-53
snp_sb042060440694	T/C	3	70247700	1.25	1.06663	0.0758867	0.0363095	0.0447217	0.0462712	0.129684	0.188101	0.805612	0.760576	0.0786982	0.187091	0.16959	1.03899e-52
snp_sb042060440844	C/T	3	70290422	1.54167	1.08222	0.13132	0.0478175	0.0687127	0.0711024	0.218711	0.304096	0.7661	0.663891	0.126568	0.204472	0.183567	5.09968e-48
snp_sb042060440845	G/C	3	70290532	1.25	1.04957	0.0713946	0.0279762	0.039444	0.0408114	0.237254	0.290736	0.811353	0.734024	0.0905882	0.148509	0.137482	1.8114e-53
snp_sb042060441004	G/C	3	70389480	1.58333	1.13191	0.17189	0.059127	0.0967782	0.100141	0.246898	0.389046	0.862491	0.774927	0.0726112	0.430339	0.337743	3.04108e-60
snp_sb042060441115	A/C	3	70462647	1.375	1.08228	0.100884	0.047619	0.0569161	0.0588928	0.113639	0.163347	0.663335	0.597605	0.168336	0.141468	0.131461	1.98096e-36
snp_sb042060441274	T/C	3	70530277	1.16667	1.0345	0.047644	0.0196429	0.0267588	0.0276888	0.133659	0.265929	0.856153	0.804043	0.0609287	0.136735	0.127386	2.40856e-59
snp_sb042060441629	T/C	3	70604368	1.41667	1.09829	0.120712	0.0505952	0.0689905	0.0713898	0.197967	0.266634	0.804868	0.733922	0.0906356	0.259464	0.225803	9.4958e-53
snp_sb042060441740	A/G	3	70623925	1.16667	1.03112	0.0448277	0.0168651	0.0246292	0.0254858	0.144342	0.315239	0.878597	0.822708	0.0538745	0.139105	0.12943	2.13608e-62
snp_sb042060441897	C/A	3	70640309	1.41667	1.07453	0.110536	0.034127	0.0600189	0.0621146	0.30136	0.431396	0.811072	0.667733	0.124401	0.180446	0.164165	9.1652e-54
snp_sb042060442084	G/T	3	70711190	1.375	1.08778	0.121688	0	0.0687226	0.0711184	1	1	1	0.428769	0.333065	0.119925	0.112734	4.6487e-80
snp_sb042060442134	G/A	3	70739462	1.16667	1.03112	0.0448277	0.0168651	0.0246292	0.0254858	0.144342	0.315239	0.878597	0.822708	0.0538745	0.139105	0.12943	2.13608e-62
snp_sb042060442385	C/T	3	70834645	1.58333	1.16975	0.192234	0.0702381	0.114	0.117957	0.258194	0.383878	0.670347	0.464955	0.287687	0.212976	0.190296	3.03907e-37
snp_sb042060442444	T/C	3	70840912	1.58333	1.16996	0.192565	0.0704365	0.114185	0.118156	0.258012	0.383137	0.669649	0.464466	0.288253	0.213488	0.1907	3.93514e-37
snp_sb042060442830	C/T	3	70955105	1.16667	1.1042	0.0845681	0.0335317	0.0574069	0.0593938	0.369256	0.415894	0.773891	0.612898	0.157898	0.148509	0.137482	8.32481e-49
snp_sb042060442831	G/A	3	70955252	1.16667	1.1078	0.0863543	0.0363095	0.058981	0.0610222	0.322672	0.384386	0.751246	0.595925	0.169516	0.14617	0.135487	4.27327e-46
snp_sb042060442937	T/C	3	70966962	1.16667	1.1042	0.0845681	0.0335317	0.0574069	0.0593938	0.369256	0.415894	0.773891	0.612898	0.157898	0.148509	0.137482	8.32481e-49
snp_sb042060442990	G/A	3	70969391	1.16667	1.1042	0.0845681	0.0335317	0.0574069	0.0593938	0.369256	0.415894	0.773891	0.612898	0.157898	0.148509	0.137482	8.32481e-49
snp_sb042060443274	C/A	3	71098786	1.25	1.06443	0.069559	0.030754	0.041018	0.0424398	0.151548	0.250233	0.748343	0.664352	0.126306	0.122349	0.114865	8.87675e-46
snp_sb042060443479	T/C	3	71232378	1.5	1.11821	0.150151	0.0505952	0.0856571	0.0886312	0.310516	0.409328	0.773465	0.616479	0.155529	0.223431	0.19847	6.89844e-49
snp_sb042060444814	A/G	3	71866629	1.41667	1.15107	0.156138	0.0583333	0.0967593	0.100096	0.350643	0.397129	0.84614	0.744787	0.0856663	0.379827	0.307693	7.97893e-58
snp_sb042060444844	G/C	3	71887238	1.41667	1.13515	0.138972	0.0561508	0.0851016	0.0880565	0.203889	0.340191	0.795413	0.689929	0.112356	0.274672	0.23695	1.51679e-51
snp_sb042060444877	G/A	3	71922125	1.58333	1.21105	0.231895	0.0646825	0.141963	0.146885	0.47481	0.544372	0.868419	0.711211	0.101513	0.491791	0.370862	5.19516e-61
snp_sb042060445022	C/G	3	71981449	1.70833	1.53027	0.420875	0.449008	0.291695	0.301799	-0.471559	-0.539309	-0.267438	0.176619	1.16548	0.353989	0.291335	4.25964e-07
snp_sb042060445145	A/T	3	72034574	1.45833	1.1535	0.165902	0.05	0.101481	0.104981	0.428608	0.507299	0.877602	0.751577	0.0826338	0.409184	0.325468	4.54862e-62
snp_sb042060445146	G/T	3	72034810	1.45833	1.1535	0.165902	0.05	0.101481	0.104981	0.428608	0.507299	0.877602	0.751577	0.0826338	0.409184	0.325468	4.54862e-62
snp_sb042060445425	G/A	3	72173860	1.20833	1.0474	0.0613819	0.0194444	0.0350926	0.0363027	0.359021	0.44591	0.818959	0.673264	0.121325	0.107685	0.101887	2.68369e-54
snp_sb042060445645	C/T	3	72284237	1.33333	1.12242	0.118695	0.05	0.0744444	0.0770115	0.236672	0.328358	0.63964	0.463463	0.289417	0.139105	0.12943	8.49082e-34
snp_sb042060445698	T/C	3	72310520	1.625	1.19038	0.219409	0.0668651	0.131111	0.135639	0.356222	0.49001	0.860382	0.726234	0.0942419	0.479326	0.364449	9.1409e-60
snp_sb042060445706	A/C	3	72320613	1.625	1.19038	0.219409	0.0668651	0.131111	0.135639	0.356222	0.49001	0.860382	0.726234	0.0942419	0.479326	0.364449	9.1409e-60
snp_sb042060446009	G/A	3	72512315	1.29167	1.06806	0.0802662	0.0333333	0.0459259	0.0475096	0.165494	0.274194	0.751267	0.657301	0.130343	0.134356	0.125331	5.68087e-46
snp_sb042060446062	C/T	3	72534207	1.45833	1.21164	0.213254	0.0642857	0.135667	0.140371	0.467296	0.526151	0.847227	0.677591	0.118954	0.419554	0.331541	5.35975e-58
snp_sb042060446112	T/C	3	72551448	1.16667	1.03432	0.0473503	0.0194444	0.0263889	0.0272989	0.265189	0.263158	0.800562	0.729334	0.0927785	0.0980111	0.093208	8.02761e-52
snp_sb042060446464	G/A	3	72723409	1.58333	1.17798	0.195403	0.072619	0.117564	0.121632	0.234471	0.382303	0.587063	0.331488	0.504174	0.175976	0.160492	7.20119e-29
snp_sb042060446486	C/T	3	72742644	1.45833	1.13006	0.1467	0.0416667	0.0873148	0.0903257	0.324297	0.5228	0.890882	0.771336	0.0741129	0.382543	0.309373	6.55398e-64
snp_sb042060446527	T/C	3	72796712	1.375	1.12555	0.135735	0.0418651	0.0830551	0.0859264	0.343226	0.495936	0.78588	0.575212	0.184622	0.195843	0.176666	3.06108e-50
snp_sb042060446990	C/G	3	73007467	1.45833	1.13647	0.146127	0.0559524	0.0873791	0.0904063	0.240728	0.359659	0.689701	0.515415	0.235046	0.180446	0.164165	3.4004e-39
snp_sb042060447019	T/A	3	73010484	1.33333	1.16367	0.151389	0.0472222	0.0982407	0.101628	0.46449	0.519321	0.740848	0.460863	0.292461	0.182669	0.165985	9.44935e-45
snp_sb042060447143	T/C	3	73063435	1.75	1.25876	0.257322	0.1	0.158675	0.164161	0.32182	0.369782	0.783329	0.656197	0.130983	0.461977	0.355265	8.76329e-50
snp_sb042060447526	A/G	3	73221660	1.45833	1.18268	0.173142	0.0474206	0.109907	0.113704	0.371969	0.568538	0.864576	0.686128	0.114363	0.347906	0.287387	3.21739e-60
snp_sb042060447936	T/C	3	73332584	1.54167	1.21538	0.213195	0.05	0.133889	0.138506	0.538467	0.626556	0.849889	0.598036	0.168035	0.333765	0.278066	2.51126e-58
snp_sb042060448262	G/A	3	73453033	1.625	1.24396	0.232322	0.0583333	0.146389	0.151437	0.458554	0.601518	0.88326	0.707039	0.103587	0.499752	0.374876	7.98811e-63
snp_sb042060448516	G/T	3	73577573	1.45833	1.1114	0.132866	0.0390873	0.0768514	0.0795088	0.314955	0.491391	0.806489	0.619528	0.153533	0.202326	0.181858	8.21656e-53
snp_sb042060448702	G/A	3	73685414	1.25	1.10684	0.100216	0.0194444	0.0636111	0.0658046	0.611537	0.694323	0.911948	0.711945	0.101151	0.221355	0.196856	6.85644e-67
snp_sb042060448971	G/C	3	73777200	1.33333	1.09318	0.103954	0.0501984	0.0618514	0.0639915	0.120605	0.188403	0.72805	0.664919	0.125985	0.184884	0.167793	2.2521e-43
snp_sb042060448972	C/T	3	73777375	1.33333	1.09318	0.103954	0.0501984	0.0618514	0.0639915	0.120605	0.188403	0.72805	0.664919	0.125985	0.184884	0.167793	2.2521e-43
snp_sb042060449143	A/C	3	73816979	1.20833	1.05981	0.0630022	0.0196429	0.0378699	0.0391831	0.267688	0.481307	0.817411	0.647982	0.135813	0.107685	0.101887	2.68369e-54
snp_sb042060449332	C/A	3	73869154	1.375	1.1414	0.133148	0.0585317	0.0836106	0.0865011	0.199905	0.299949	0.599003	0.427189	0.335221	0.14617	0.135487	6.2639e-30
snp_sb042060449371	A/C	3	73886025	1.25	1.09489	0.088228	0.0335317	0.0557403	0.0576697	0.235419	0.398429	0.647696	0.414361	0.353339	0.0952507	0.0907143	9.26761e-35
snp_sb042060449793	A/G	3	74064092	1.58333	1.2048	0.215357	0.0619048	0.132056	0.136636	0.400938	0.531223	0.848585	0.677	0.119276	0.409184	0.325468	2.18234e-58
snp_sb042060449891	T/C	3	74104983	1.58333	1.20609	0.224545	0.072619	0.137194	0.141939	0.420661	0.470683	0.805001	0.631603	0.145818	0.372902	0.303374	1.26033e-52
snp_sb042060449984	C/T	3	74120706	1.58333	1.20434	0.224078	0.0753968	0.136731	0.14146	0.410067	0.448575	0.796774	0.631453	0.145912	0.371494	0.30249	1.36181e-51
snp_sb042060450245	C/A	3	74187584	1.25	1.06895	0.0765473	0.0224206	0.0453699	0.0469417	0.328012	0.505826	0.804915	0.605229	0.163067	0.115052	0.108433	1.08107e-52
snp_sb042060450323	G/A	3	74263066	1.29167	1.07488	0.0867527	0.0224206	0.0505551	0.0523057	0.42401	0.556511	0.81283	0.577959	0.182556	0.119925	0.112734	1.08517e-53
snp_sb042060450363	T/C	3	74307046	1.33333	1.07775	0.0928421	0.0251984	0.0532403	0.0550835	0.366699	0.526704	0.793803	0.564339	0.192996	0.122349	0.114865	2.7536e-51
snp_sb042060450372	C/A	3	74311135	1.33333	1.07775	0.0928421	0.0251984	0.0532403	0.0550835	0.366699	0.526704	0.793803	0.564339	0.192996	0.122349	0.114865	2.7536e-51
snp_sb042060450506	T/C	3	74382900	1.33333	1.07775	0.0928421	0.0251984	0.0532403	0.0550835	0.366699	0.526704	0.793803	0.564339	0.192996	0.122349	0.114865	2.7536e-51
snp_sb042060461709	A/G	4	2370680	2	1.96341	0.681696	0.941667	0.488981	0.505896	-0.914036	-0.925772	-0.883464	0.0219691	11.1296	0.499965	0.374983	7.52045e-63
snp_sb042060461734	C/G	4	2909620	1.5	1.18412	0.180574	0.0694444	0.112286	0.116173	0.35209	0.381542	0.730016	0.563457	0.19369	0.257528	0.224368	1.83187e-43
snp_sb042060462505	T/C	4	67048054	1.5	1.12415	0.148198	0.055754	0.0859255	0.0888957	0.157772	0.351136	0.735143	0.591815	0.17243	0.210861	0.18863	3.5516e-44
snp_sb042060463427	G/A	4	66231731	1.66667	1.17555	0.216926	0.0561508	0.125842	0.130202	0.444958	0.5538	0.885134	0.742569	0.086669	0.489102	0.369492	2.93069e-63
snp_sb042060463770	A/G	4	7422388	1.20833	1.06301	0.0638411	0.0390873	0.0387032	0.0400452	0.0854662	-0.00992347	0.659895	0.663237	0.126939	0.115052	0.108433	5.44595e-36
snp_sb042060463773	C/T	4	7422481	1.20833	1.06301	0.0638411	0.0390873	0.0387032	0.0400452	0.0854662	-0.00992347	0.659895	0.663237	0.126939	0.115052	0.108433	5.44595e-36
snp_sb042060463775	A/C	4	7422642	1.58333	1.12119	0.155187	0.0640873	0.0871292	0.0901409	0.214501	0.264456	0.630533	0.497696	0.252315	0.17373	0.158639	5.75242e-33
snp_sb042060463777	C/T	4	7424990	1.20833	1.06301	0.0638411	0.0390873	0.0387032	0.0400452	0.0854662	-0.00992347	0.659895	0.663237	0.126939	0.115052	0.108433	5.44595e-36
snp_sb042060463939	T/A	4	5585974	1.54167	1.17491	0.195209	0.0642857	0.118231	0.122348	0.407195	0.456272	0.761225	0.560856	0.195747	0.270245	0.233729	5.97452e-47
snp_sb042060463947	T/G	4	59148718	1.45833	1.22237	0.200556	0.0587302	0.131077	0.135646	0.350259	0.551942	0.875728	0.722642	0.0959526	0.472626	0.360938	6.71467e-62
snp_sb042060464239	C/T	4	2234947	1.66667	1.2711	0.27387	0.0781746	0.172009	0.177954	0.496171	0.545519	0.837533	0.642522	0.139092	0.481529	0.365594	8.94897e-57
snp_sb042060464267	A/G	4	2918144	1.5	1.18412	0.180574	0.0694444	0.112286	0.116173	0.35209	0.381542	0.730016	0.563457	0.19369	0.257528	0.224368	1.83187e-43
snp_sb042060464986	A/T	4	2801430	1.66667	1.35481	0.311855	0.0805556	0.205833	0.212931	0.491318	0.608637	0.838878	0.588305	0.17495	0.499938	0.374969	7.94872e-57
snp_sb042060466163	A/C	4	8302033	1.58333	1.23454	0.227025	0.0474206	0.143425	0.148378	0.447592	0.669371	0.865818	0.594162	0.17076	0.353989	0.291335	1.55193e-60
snp_sb042060467050	A/C	4	66230475	1.66667	1.17555	0.216926	0.0561508	0.125842	0.130202	0.444958	0.5538	0.885134	0.742569	0.086669	0.489102	0.369492	2.93069e-63
snp_sb042060467077	G/A	4	3763523	1.625	1.24019	0.243902	0.0835317	0.151768	0.157022	0.436898	0.44961	0.794444	0.626526	0.149026	0.406794	0.324053	3.19833e-51
snp_sb042060467095	C/G	4	10952435	1.375	1.0718	0.0999448	0.0140873	0.0549069	0.0568076	0.590786	0.743433	0.893118	0.583414	0.178512	0.131971	0.123262	2.00187e-64
snp_sb042060467208	A/C	4	61245541	1.625	1.21075	0.216893	0.0696429	0.133611	0.138225	0.345349	0.478763	0.804593	0.625109	0.14993	0.356984	0.293265	1.61644e-52
snp_sb042060467212	A/G	4	67967761	1.33333	1.08985	0.104306	0.0388889	0.0609259	0.0630268	0.401407	0.361702	0.807325	0.698142	0.108093	0.202326	0.181858	8.21656e-53
snp_sb042060467320	G/A	4	700570	1.5	1.19393	0.195958	0.0698413	0.122842	0.127092	0.288426	0.431455	0.750468	0.561105	0.19555	0.280247	0.240978	5.23772e-46
snp_sb042060467371	G/A	4	56533946	1.70833	1.27285	0.275049	0.055754	0.172222	0.178168	0.535824	0.676266	0.88271	0.637697	0.142036	0.475788	0.362601	8.09272e-63
snp_sb042060467392	T/C	4	1257548	1.16667	1.07549	0.0750565	0.0138889	0.0475	0.0491379	0.696212	0.707602	0.890508	0.625536	0.149657	0.127175	0.119089	7.19535e-64
snp_sb042060469587	T/A	4	55578094	1.70833	1.1649	0.213585	0.0642857	0.121361	0.12556	0.336288	0.470291	0.842237	0.702169	0.106039	0.407993	0.324764	2.00221e-57
snp_sb042060469597	A/G	4	56000387	1.25	1.09132	0.092634	0.0474206	0.0576847	0.0596812	0.139388	0.177934	0.626666	0.545859	0.207994	0.127175	0.119089	1.29825e-32
snp_sb042060470245	G/A	4	66235902	1.66667	1.17555	0.216926	0.0561508	0.125842	0.130202	0.444958	0.5538	0.885134	0.742569	0.086669	0.489102	0.369492	2.93069e-63
snp_sb042060470285	T/C	4	66085496	1.5	1.10266	0.137431	0.0478175	0.0761201	0.0787653	0.272073	0.371815	0.872114	0.796419	0.063905	0.374303	0.304251	1.59476e-61
snp_sb042060470552	T/C	4	58371862	1.20833	1.03671	0.055107	0.0166667	0.0298148	0.0308429	0.355438	0.440994	0.883821	0.792169	0.0655894	0.14456	0.134111	1.36103e-62
snp_sb042060471551	A/T	4	4854052	1.58333	1.16948	0.200943	0.0361111	0.118611	0.122701	0.599203	0.69555	0.922613	0.745814	0.085204	0.467164	0.358043	2.08501e-68
snp_sb042060472736	C/G	4	2762575	1.70833	1.35992	0.317614	0.075	0.208241	0.215421	0.591852	0.63984	0.84999	0.58349	0.178457	0.499938	0.374969	2.68078e-58
snp_sb042060472737	T/C	4	8820309	1.66667	1.23848	0.255863	0.0587302	0.157334	0.162785	0.495002	0.626716	0.860638	0.62666	0.14894	0.421773	0.332827	7.17346e-60
snp_sb042060474125	A/C	4	3218711	1.54167	1.12716	0.159272	0.0670635	0.0908976	0.0940461	0.246915	0.262208	0.761957	0.677357	0.119081	0.28209	0.242302	2.2652e-47
snp_sb042060475058	C/T	4	57980808	1.25	1.09334	0.0963916	0.047619	0.0596098	0.0617071	0.251251	0.201154	0.739123	0.673433	0.121232	0.180906	0.164542	3.06483e-43
snp_sb042060475077	A/C	4	62064647	1.54167	1.21697	0.213124	0.0529762	0.134722	0.139375	0.373941	0.606773	0.891522	0.724134	0.0952399	0.488687	0.36928	4.87191e-64
snp_sb042060476519	C/G	4	55589915	1.54167	1.245	0.233834	0.080754	0.150462	0.155658	0.343085	0.463295	0.809262	0.644613	0.13783	0.423961	0.334089	4.31756e-53
snp_sb042060479411	T/C	4	51981645	1.5	1.13894	0.162587	0.0305556	0.0960374	0.0993751	0.455023	0.681837	0.823027	0.443767	0.313359	0.169214	0.154898	2.68746e-54
snp_sb042060479423	A/G	4	55580110	1.70833	1.1649	0.213585	0.0642857	0.121361	0.12556	0.336288	0.470291	0.842237	0.702169	0.106039	0.407993	0.324764	2.00221e-57
snp_sb042060479510	T/A	4	13838999	1.625	1.13486	0.182225	0.0589286	0.102416	0.105968	0.336612	0.424618	0.789556	0.634254	0.144164	0.280247	0.240978	8.22817e-51
snp_sb042060479516	C/G	4	67047132	1.5	1.12415	0.148198	0.055754	0.0859255	0.0888957	0.157772	0.351136	0.735143	0.591815	0.17243	0.210861	0.18863	3.5516e-44
snp_sb042060479618	G/A	4	13905444	1.5	1.11247	0.151365	0.0390873	0.0853699	0.088321	0.427013	0.542142	0.84442	0.6602	0.128673	0.251674	0.220004	1.0641e-57
snp_sb042060479622	G/A	4	13910701	1.5	1.11247	0.151365	0.0390873	0.0853699	0.088321	0.427013	0.542142	0.84442	0.6602	0.128673	0.251674	0.220004	1.0641e-57
snp_sb042060479628	C/T	4	13913891	1.5	1.11247	0.151365	0.0390873	0.0853699	0.088321	0.427013	0.542142	0.84442	0.6602	0.128673	0.251674	0.220004	1.0641e-57
snp_sb042060479631	C/G	4	13914730	1.58333	1.14552	0.182907	0.0668651	0.105555	0.109202	0.332936	0.366539	0.752757	0.609696	0.160041	0.270917	0.234219	3.28043e-46
snp_sb042060479633	G/A	4	13918129	1.625	1.13164	0.178885	0.0561508	0.100102	0.103574	0.339257	0.439062	0.798145	0.640148	0.140535	0.278396	0.239644	6.94459e-52
snp_sb042060480262	G/A	4	55471189	1.79167	1.27192	0.285928	0.0863095	0.175833	0.181903	0.336752	0.509139	0.827218	0.648001	0.135802	0.499441	0.374721	2.37293e-55
snp_sb042060482384	G/T	4	67051298	1.5	1.12415	0.148198	0.055754	0.0859255	0.0888957	0.157772	0.351136	0.735143	0.591815	0.17243	0.210861	0.18863	3.5516e-44
snp_sb042060485389	T/C	4	2178963	1.66667	1.27984	0.272389	0.0751984	0.172046	0.177999	0.556841	0.562917	0.847239	0.650499	0.13432	0.492489	0.371216	5.37518e-58
snp_sb042060488215	G/A	4	1553927	1.45833	1.2139	0.201979	0.0670635	0.129786	0.134276	0.481529	0.483278	0.8471	0.704097	0.105065	0.437427	0.341756	5.57439e-58
snp_sb042060493435	T/C	4	56427040	1.75	1.28768	0.299163	0.0918651	0.185935	0.192367	0.446213	0.505929	0.813881	0.623295	0.151094	0.493793	0.371877	1.19806e-53
snp_sb042060493961	A/G	4	7766168	1.16667	1.07009	0.0685267	0.0111111	0.0435185	0.0450192	0.54462	0.744681	0.894118	0.585294	0.177136	0.105213	0.0996784	2.25111e-64
snp_sb042060498023	G/A	4	66114878	1.625	1.16253	0.204203	0.0753968	0.119	0.12313	0.279407	0.366415	0.843505	0.753	0.0820051	0.482061	0.36587	1.47106e-57
snp_sb042060499272	C/G	4	61245246	1.625	1.2138	0.221009	0.0668651	0.136111	0.140811	0.414315	0.508745	0.811598	0.616489	0.155523	0.355491	0.292304	2.09163e-53
snp_sb042060499545	G/A	4	49235680	1.33333	1.10052	0.105217	0.0446429	0.0637032	0.0659072	0.170209	0.299206	0.67864	0.541435	0.211736	0.139105	0.12943	6.08674e-38
snp_sb042060502619	C/G	4	57544672	1.33333	1.05455	0.0863242	0.0335317	0.0457403	0.0473248	0.195083	0.26691	0.798837	0.725596	0.0945441	0.166945	0.153009	7.17174e-52
snp_sb042060504251	C/G	4	8727202	1.375	1.13185	0.128466	0.0446429	0.0798143	0.0825739	0.316287	0.440666	0.611555	0.305523	0.56827	0.115052	0.108433	3.77128e-31
snp_sb042060504281	T/C	4	3938248	1.33333	1.10827	0.105737	0.055754	0.0648143	0.0670567	0.183891	0.13979	0.635459	0.576219	0.183863	0.153165	0.141435	1.81154e-33
snp_sb042060504579	T/C	4	57759033	1.29167	1.07616	0.0968472	0.0279762	0.056481	0.058436	0.325267	0.50468	0.864367	0.72617	0.0942719	0.206609	0.185266	2.15254e-60
snp_sb042060504839	A/G	4	67728455	1.54167	1.16405	0.189509	0.0696429	0.113055	0.116961	0.270869	0.383992	0.829054	0.722494	0.0960238	0.407993	0.324764	1.22642e-55
snp_sb042060505275	C/T	4	707185	1.5	1.19393	0.195958	0.0698413	0.122842	0.127092	0.288426	0.431455	0.750468	0.561105	0.19555	0.280247	0.240978	5.23772e-46
snp_sb042060508154	C/T	4	56086871	1.54167	1.24373	0.242047	0.0892857	0.154416	0.159755	0.381714	0.421785	0.77892	0.617652	0.154759	0.404373	0.322614	2.26291e-49
snp_sb042060508170	G/T	4	48620167	1.16667	1.02419	0.0387456	0.00555556	0.0201852	0.0208812	0.482759	0.724771	0.962496	0.863736	0.0394404	0.148509	0.137482	2.64769e-74
snp_sb042060511358	A/G	4	830282	1.625	1.22673	0.237722	0.0751984	0.14649	0.151562	0.40242	0.486667	0.848186	0.704258	0.104984	0.495515	0.372748	4.04253e-58
snp_sb042060512055	G/A	4	55829925	1.66667	1.2553	0.261975	0.0888889	0.163889	0.16954	0.345429	0.457627	0.818434	0.665238	0.125806	0.489102	0.369492	3.79396e-54
snp_sb042060512806	G/A	4	941340	1.20833	1.06548	0.0675341	0.0277778	0.0409259	0.0423372	0.211207	0.321267	0.757934	0.643357	0.138587	0.115052	0.108433	9.22608e-47
snp_sb042060512854	A/G	4	55863631	1.70833	1.24789	0.263441	0.0668651	0.161953	0.167558	0.459634	0.587134	0.856437	0.652278	0.133272	0.464987	0.356881	3.45734e-59
snp_sb042060513018	C/T	4	58275618	1.33333	1.05809	0.0886171	0.030754	0.0476847	0.0493363	0.200043	0.355056	0.855354	0.775723	0.0722798	0.212976	0.190296	3.56226e-59
snp_sb042060513319	T/A	4	8827254	1.41667	1.11927	0.129294	0.0392857	0.0771939	0.0798699	0.356641	0.491077	0.643543	0.299585	0.584489	0.110148	0.104082	1.92079e-34
snp_sb042060513699	G/C	4	5049067	1.79167	1.26953	0.290171	0.0730159	0.176953	0.183082	0.426978	0.587371	0.853931	0.646005	0.136994	0.499965	0.374982	1.29038e-58
snp_sb042060513898	G/A	4	1325078	1.625	1.3114	0.290292	0.0918651	0.189351	0.195888	0.432513	0.514843	0.816153	0.621057	0.15254	0.499612	0.374806	6.33632e-54
snp_sb042060514385	G/C	4	2849932	1.625	1.38299	0.318437	0.0805556	0.214537	0.221935	0.570445	0.624514	0.82128	0.52403	0.227072	0.449581	0.34852	1.77808e-54
snp_sb042060515233	C/A	4	66381065	1.91667	1.76467	0.551707	0.755556	0.39	0.403501	-0.80642	-0.937322	-0.607143	0.170431	1.21687	0.469957	0.359527	1.53234e-30
snp_sb042060515286	T/C	4	55575780	1.625	1.19027	0.219381	0.0503968	0.130898	0.135425	0.447594	0.61499	0.89918	0.738136	0.0886912	0.499903	0.374952	3.68448e-65
snp_sb042060515294	G/A	4	55961855	1.54167	1.20012	0.220047	0.0613095	0.135842	0.140547	0.51886	0.548671	0.875865	0.724956	0.0948485	0.494099	0.372032	7.28596e-62
snp_sb042060515463	G/A	4	50769444	1.375	1.1067	0.127243	0.0501984	0.0749164	0.0775201	0.283533	0.329941	0.793949	0.692488	0.111017	0.24376	0.21405	3.45233e-51
snp_sb042060515647	T/A	4	8151141	1.375	1.09922	0.121494	0.0529762	0.0713884	0.0738574	0.195708	0.257916	0.750836	0.664237	0.126371	0.212976	0.190296	5.25782e-46
snp_sb042060515780	G/A	4	1587275	1.58333	1.30242	0.268779	0.0920635	0.176175	0.182264	0.444002	0.477433	0.781296	0.581481	0.179937	0.419554	0.331541	1.55358e-49
snp_sb042060516039	T/A	4	62994018	1.5	1.1131	0.151273	0.0617063	0.0854719	0.0884396	0.162878	0.278051	0.778174	0.69274	0.110886	0.278396	0.239644	2.07476e-49
snp_sb042060516565	A/G	4	54109684	1.625	1.18405	0.212473	0.0779762	0.126213	0.130585	0.344661	0.382184	0.835992	0.734535	0.0903512	0.475788	0.362601	1.61389e-56
snp_sb042060516594	T/A	4	67370501	1.33333	1.0752	0.101824	0.0390873	0.0575921	0.0595854	0.300145	0.321308	0.8468	0.774271	0.0728842	0.255585	0.222923	5.16383e-58
snp_sb042060516636	C/A	4	52473744	1.66667	1.14406	0.198924	0.0559524	0.111686	0.115563	0.404083	0.499019	0.879961	0.760392	0.0787779	0.466446	0.35766	1.70462e-62
snp_sb042060517070	A/T	4	62898039	1.29167	1.1068	0.11275	0.0446429	0.069444	0.0718459	0.20552	0.357138	0.803481	0.694306	0.110072	0.227559	0.201667	2.02751e-52
snp_sb042060517281	A/T	4	67342998	1.70833	1.1906	0.238486	0.0527778	0.138796	0.143582	0.537915	0.619746	0.892106	0.716257	0.0990365	0.488687	0.36928	4.87191e-64
snp_sb042060517631	G/A	4	4685387	1.625	1.24164	0.257833	0.0527778	0.159907	0.165421	0.676863	0.669948	0.830607	0.486769	0.26359	0.31223	0.263486	8.62109e-56
snp_sb042060517677	A/G	4	55999475	1.25	1.09132	0.092634	0.0474206	0.0576847	0.0596812	0.139388	0.177934	0.626666	0.545859	0.207994	0.127175	0.119089	1.29825e-32
snp_sb042060517678	T/C	4	55814311	1.66667	1.24503	0.25262	0.075	0.156944	0.162356	0.370907	0.522124	0.848879	0.683766	0.115622	0.496027	0.373006	3.85344e-58
snp_sb042060517679	C/G	4	788467	1.79167	1.1921	0.235347	0.0753968	0.13562	0.14031	0.256802	0.444057	0.765775	0.578689	0.182011	0.322332	0.270383	8.24722e-48
snp_sb042060517760	G/C	4	2188090	1.70833	1.27923	0.275012	0.075	0.172286	0.178242	0.544018	0.564679	0.847415	0.649489	0.134918	0.491791	0.370862	5.74308e-58
snp_sb042060517773	T/C	4	58335056	1.20833	1.03671	0.055107	0.0166667	0.0298148	0.0308429	0.355438	0.440994	0.883821	0.792169	0.0655894	0.143823	0.13348	6.10749e-63
snp_sb042060517832	C/T	4	62080525	1.54167	1.21697	0.213124	0.0529762	0.134722	0.139375	0.373941	0.606773	0.891522	0.724134	0.0952399	0.488687	0.36928	4.87191e-64
snp_sb042060517849	C/T	4	3838289	1.16667	1.04882	0.0467778	0.0222222	0.0285185	0.0295019	0.0544547	0.220779	0.814218	0.761579	0.0782653	0.119925	0.112734	1.08517e-53
snp_sb042060517985	A/G	4	67869324	1.29167	1.08496	0.0901038	0.0555556	0.0540741	0.0559387	-0.0356301	-0.0273973	0.535544	0.547929	0.206263	0.119925	0.112734	3.47234e-24
snp_sb042060517997	C/A	4	66249195	1.66667	1.17262	0.212406	0.053373	0.123157	0.127424	0.445176	0.566627	0.89053	0.747401	0.0844926	0.487834	0.368843	5.17762e-64
snp_sb042060517998	C/G	4	57455829	1.45833	1.09901	0.143025	0.0505952	0.079546	0.0823093	0.314269	0.36395	0.788859	0.668043	0.124228	0.239756	0.211015	9.21376e-51
snp_sb042060518023	C/G	4	3761717	1.625	1.24019	0.243902	0.0835317	0.151768	0.157022	0.436898	0.44961	0.794444	0.626526	0.149026	0.406794	0.324053	3.19833e-51
snp_sb042060518024	T/C	4	57554554	1.45833	1.08265	0.126748	0.0478175	0.0683423	0.0707193	0.215617	0.300324	0.79803	0.711338	0.10145	0.233692	0.206386	1.43538e-51
snp_sb042060518025	C/T	4	52593887	1.45833	1.0998	0.138967	0.0392857	0.0781198	0.0808277	0.376195	0.497109	0.833152	0.668223	0.124127	0.235721	0.207939	2.54343e-56
snp_sb042060518027	A/G	4	48069237	1.625	1.17207	0.212025	0.05	0.124601	0.128912	0.455081	0.59872	0.876195	0.691476	0.111546	0.404373	0.322614	7.20876e-62
snp_sb042060518032	A/G	4	1311647	1.54167	1.28324	0.263497	0.0779762	0.171953	0.177903	0.52324	0.546527	0.843922	0.655816	0.131204	0.499531	0.374765	1.52579e-57
snp_sb042060518034	C/G	4	55858256	1.70833	1.25127	0.266257	0.0696429	0.164083	0.169761	0.447484	0.575563	0.850238	0.647151	0.136308	0.464246	0.356484	2.34685e-58
snp_sb042060518036	G/T	4	56525121	1.70833	1.27285	0.275049	0.055754	0.172222	0.178168	0.535824	0.676266	0.88271	0.637697	0.142036	0.475788	0.362601	8.09272e-63
snp_sb042060518048	C/A	4	6372570	1.625	1.19338	0.213785	0.0446429	0.12825	0.132692	0.541163	0.651907	0.904792	0.726487	0.0941216	0.46927	0.359163	6.52734e-66
snp_sb042060518053	T/C	4	2277282	1.58333	1.32555	0.283017	0.0613095	0.188333	0.194834	0.554515	0.674462	0.842228	0.515351	0.235106	0.389196	0.313459	2.27927e-57
snp_sb042060518094	A/G	4	2812374	1.625	1.35017	0.302775	0.0638889	0.201574	0.208525	0.571658	0.68305	0.872198	0.596774	0.168919	0.49986	0.37493	2.68558e-61
snp_sb042060518096	T/A	4	1624499	1.375	1.24092	0.201779	0.0529762	0.13612	0.140834	0.678802	0.610813	0.853606	0.623848	0.150739	0.359948	0.295167	9.44074e-59
snp_sb042060518142	T/A	4	4395231	1.16667	1.07972	0.0762981	0.0305556	0.0489815	0.0506705	0.595833	0.376181	0.818976	0.709812	0.102206	0.169214	0.154898	2.68746e-54
snp_sb042060518152	C/T	4	55874920	1.5	1.25941	0.24787	0.0670635	0.16113	0.166712	0.516807	0.583793	0.846364	0.630866	0.146281	0.43544	0.340636	6.89601e-58
snp_sb042060518155	G/A	4	52947333	1.08333	1.01845	0.0265669	0.00555556	0.0148148	0.0153257	0.711538	0.625	0.94152	0.844055	0.0461894	0.0952507	0.0907143	3.51284e-71
snp_sb042060518206	A/C	4	3862091	1.33333	1.08658	0.0977982	0.0446429	0.0574069	0.0593938	0.195051	0.222344	0.778984	0.715793	0.0992632	0.202326	0.181858	2.16814e-49
snp_sb042060518213	C/A	4	55080028	1.5	1.14741	0.168922	0.0503968	0.100898	0.104391	0.318033	0.500515	0.835662	0.670986	0.122586	0.307074	0.259927	1.32824e-56
snp_sb042060518238	C/T	4	57143926	1.625	1.25044	0.253365	0.0724206	0.159074	0.164566	0.530081	0.544735	0.854403	0.680194	0.117542	0.497575	0.373785	5.98453e-59
snp_sb042060518262	C/A	4	55506292	1.75	1.28345	0.280695	0.080754	0.176018	0.182095	0.36085	0.541218	0.837432	0.645653	0.137205	0.496508	0.373248	1.11344e-56
snp_sb042060518268	C/T	4	8269218	1.625	1.27857	0.269169	0.0531746	0.172101	0.17805	0.526746	0.691027	0.869504	0.577647	0.182791	0.407993	0.324764	4.36888e-61
snp_sb042060518270	G/A	4	55636612	1.625	1.15959	0.200756	0.0644841	0.115935	0.119953	0.313887	0.44379	0.846146	0.723388	0.095596	0.419554	0.331541	5.35975e-58
snp_sb042060518391	A/G	4	4426262	1.125	1.05534	0.0598479	0.0194444	0.0378704	0.0391762	0.550552	0.486553	0.866635	0.740256	0.0877212	0.14617	0.135487	1.38061e-60
snp_sb042060518410	G/A	4	2801266	1.58333	1.35367	0.300352	0.0722222	0.201852	0.208812	0.593225	0.642202	0.853365	0.590174	0.173604	0.494173	0.372069	2.53169e-57
snp_sb042060518489	G/C	4	61259241	1.625	1.21075	0.216893	0.0696429	0.133611	0.138225	0.345349	0.478763	0.804593	0.625109	0.14993	0.356984	0.293265	1.61644e-52
snp_sb042060518501	T/G	4	42145991	1.29167	1.05999	0.0780072	0.030754	0.0436106	0.0451218	0.176467	0.294806	0.726597	0.6123	0.158296	0.112604	0.106264	2.86568e-43
snp_sb042060518505	A/C	4	55827632	1.66667	1.25835	0.266091	0.0916667	0.166389	0.172126	0.34312	0.449082	0.812605	0.65985	0.128874	0.488687	0.36928	2.1183e-53
snp_sb042060518509	C/G	4	1567665	1.5	1.17652	0.180218	0.0696429	0.110833	0.114662	0.407484	0.371641	0.785769	0.659063	0.129327	0.325638	0.272618	3.53066e-50
snp_sb042060518512	G/C	4	56068369	1.66667	1.2754	0.284796	0.0920635	0.178768	0.184946	0.499919	0.485011	0.815627	0.641987	0.139416	0.49924	0.37462	6.59737e-54
snp_sb042060518837	T/C	4	4809104	1.29167	1.111	0.1164	0.0333333	0.0722222	0.0747126	0.58534	0.538462	0.827462	0.626168	0.149254	0.193667	0.174914	2.17054e-55
snp_sb042060519027	A/C	4	440649	1.41667	1.16304	0.157997	0.0555556	0.0988889	0.102299	0.431392	0.438202	0.624961	0.33243	0.502037	0.148509	0.137482	2.43656e-32
snp_sb042060519195	T/C	4	55651974	1.58333	1.13079	0.182986	0.0617063	0.102879	0.106447	0.272415	0.400207	0.860039	0.766652	0.0760932	0.441306	0.343931	7.56942e-60
snp_sb042060519395	C/A	4	4521173	1.33333	1.11899	0.120194	0.0305556	0.074537	0.0771073	0.476503	0.590062	0.739259	0.363951	0.436906	0.117492	0.11059	1.43157e-44
snp_sb042060519817	C/G	4	2788408	1.625	1.12895	0.165419	0.0501984	0.0927773	0.0959839	0.314165	0.458937	0.580937	0.225483	0.858733	0.119925	0.112734	2.87532e-28
snp_sb042060519903	C/A	4	53916217	1.54167	1.09902	0.143504	0.0390873	0.078518	0.0812329	0.357174	0.502187	0.824759	0.647978	0.135815	0.223431	0.19847	3.87084e-55
snp_sb042060520520	T/C	4	11552743	1.58333	1.14734	0.17013	0.0613095	0.0998143	0.103264	0.255812	0.385764	0.659692	0.445964	0.310583	0.180446	0.164165	6.37204e-36
snp_sb042060521073	T/C	4	13311082	1.58333	1.13199	0.176136	0.0561508	0.0997312	0.103191	0.363118	0.436979	0.798145	0.64148	0.139724	0.278396	0.239644	6.94459e-52
snp_sb042060521080	G/A	4	4877923	1.20833	1.08416	0.0850861	0.0333333	0.0537037	0.0555556	0.432345	0.37931	0.721326	0.551026	0.203699	0.119925	0.112734	1.61666e-42
snp_sb042060521082	C/G	4	1348379	1.54167	1.18401	0.185963	0.0724206	0.115	0.118972	0.20876	0.370253	0.80834	0.695656	0.109373	0.378458	0.306843	5.49742e-53
snp_sb042060521083	A/G	4	1647986	1.625	1.36586	0.308036	0.0696429	0.20649	0.213631	0.570911	0.662731	0.842904	0.534212	0.217979	0.442257	0.344461	2.28214e-57
snp_sb042060521087	G/T	4	7790103	1.33333	1.11624	0.114283	0.0333333	0.0707407	0.0731801	0.345214	0.528796	0.902698	0.793504	0.0650582	0.343262	0.284348	1.42792e-65
snp_sb042060521089	A/G	4	2178375	1.66667	1.31034	0.296618	0.0779762	0.190102	0.196677	0.585438	0.589818	0.84388	0.619389	0.153624	0.499531	0.374765	1.52579e-57
snp_sb042060521090	C/T	4	53607958	1.54167	1.09738	0.139577	0.0365079	0.0761121	0.0787752	0.334001	0.52034	0.89826	0.787891	0.0673029	0.360477	0.295505	4.64308e-64
snp_sb042060521091	C/T	4	62922409	1.5	1.10694	0.144821	0.0672619	0.0813979	0.0842251	0.072933	0.173665	0.461733	0.348609	0.467135	0.124766	0.116983	1.43126e-18
snp_sb042060521092	C/A	4	1301354	1.70833	1.22864	0.243704	0.0890873	0.148703	0.153838	0.324915	0.400905	0.808207	0.679862	0.117722	0.464987	0.356881	6.05615e-53
snp_sb042060521102	A/G	4	57980411	1.33333	1.10813	0.11885	0.0559524	0.0717678	0.0742702	0.216535	0.220369	0.704663	0.621184	0.152457	0.191168	0.172896	2.68849e-40
snp_sb042060521110	C/A	4	1613259	1.66667	1.25685	0.246255	0.0865079	0.154879	0.160234	0.327411	0.441448	0.826827	0.68996	0.11234	0.499612	0.374806	2.33151e-55
snp_sb042060521313	C/T	4	58890175	1.41667	1.07458	0.108033	0.0277778	0.0586754	0.0607128	0.349319	0.526585	0.913259	0.816776	0.0560816	0.320668	0.269254	4.58947e-67
snp_sb042060521560	A/G	4	67756511	1.75	1.17987	0.231786	0.0696429	0.133342	0.137961	0.297926	0.477714	0.854432	0.721288	0.0966024	0.478756	0.364152	5.80909e-59
snp_sb042060521588	C/A	4	3807296	1.5	1.13685	0.161516	0.0444444	0.0948148	0.0980843	0.398126	0.53125	0.817247	0.610128	0.15975	0.24376	0.21405	4.51667e-54
snp_sb042060521594	C/T	4	2840651	1.58333	1.34845	0.293864	0.0751984	0.197129	0.203934	0.575077	0.618532	0.825801	0.543346	0.210112	0.430339	0.337743	4.14326e-55
snp_sb042060521597	T/G	4	52835248	1.70833	1.28554	0.274185	0.072619	0.173675	0.179678	0.432483	0.581869	0.84417	0.627317	0.148522	0.466446	0.35766	1.17129e-57
snp_sb042060521603	C/G	4	52870130	1.375	1.07483	0.105909	0.0337302	0.0586754	0.0607128	0.290905	0.425139	0.817422	0.682397	0.116356	0.184884	0.167793	2.47386e-54
snp_sb042060521608	T/A	4	6401907	1.58333	1.22407	0.237924	0.0501984	0.147324	0.152424	0.578215	0.659265	0.894358	0.68996	0.11234	0.474546	0.361949	2.08201e-64
snp_sb042060521686	T/A	4	2474232	1.5	1.13515	0.161746	0.0585317	0.0949069	0.0981869	0.349993	0.383272	0.744644	0.58595	0.176657	0.229611	0.20325	2.84886e-45
snp_sb042060521755	C/T	4	6774274	1.54167	1.13506	0.177739	0.0361111	0.1025	0.106034	0.508523	0.647696	0.897789	0.709877	0.102174	0.350963	0.289376	9.3563e-65
snp_sb042060521767	T/G	4	562408	1.29167	1.07127	0.0811052	0.0194444	0.0467593	0.0483716	0.446597	0.584158	0.85743	0.657153	0.130429	0.136735	0.127386	2.40856e-59
snp_sb042060521891	A/G	4	66146475	1.58333	1.15546	0.195786	0.0751984	0.114351	0.118302	0.262499	0.342392	0.84388	0.762594	0.0778285	0.482061	0.36587	1.47106e-57
snp_sb042060521941	A/C	4	5015706	1.20833	1.06403	0.0688696	0.0279762	0.0416662	0.0431103	0.336739	0.328564	0.733851	0.603612	0.164173	0.105213	0.0996784	4.10493e-44
snp_sb042060521969	A/G	4	8301852	1.58333	1.23454	0.227025	0.0474206	0.143425	0.148378	0.447592	0.669371	0.865818	0.594162	0.17076	0.353989	0.291335	1.55193e-60
snp_sb042060522214	G/T	4	67046039	1.33333	1.0697	0.088218	0.0222222	0.05	0.0517241	0.257311	0.555556	0.834178	0.6269	0.148788	0.134356	0.125331	2.88617e-56
snp_sb042060522216	A/G	4	11530385	1.45833	1.09512	0.121635	0.0333333	0.0687037	0.0710728	0.276351	0.514825	0.774977	0.536202	0.216242	0.148509	0.137482	8.32481e-49
snp_sb042060522240	G/A	4	51688994	1.41667	1.08678	0.109323	0.0448413	0.061268	0.0633948	0.180622	0.268112	0.688151	0.573912	0.185607	0.143823	0.13348	4.52527e-39
snp_sb042060522246	G/A	4	62163305	1.79167	1.2596	0.276165	0.0890873	0.168518	0.174336	0.311212	0.471349	0.821153	0.661692	0.127819	0.497948	0.373972	1.45821e-54
snp_sb042060522501	C/A	4	4494636	1.41667	1.1483	0.151487	0.0501984	0.0942588	0.0975164	0.334286	0.46744	0.839823	0.699231	0.107536	0.313933	0.264656	4.51918e-57
snp_sb042060522685	T/C	4	42500860	1.70833	1.14993	0.205976	0.0728175	0.115102	0.119091	0.286273	0.367363	0.748156	0.601913	0.165342	0.289383	0.247512	8.48276e-46
snp_sb042060522765	G/A	4	67859982	1.25	1.08209	0.0840144	0.0527778	0.0513889	0.0531609	-0.0358214	-0.027027	0.54963	0.561481	0.195251	0.117492	0.11059	2.17641e-25
snp_sb042060522877	A/G	4	58231984	1.29167	1.14365	0.131274	0.0198413	0.0852494	0.0882032	0.533535	0.767256	0.932484	0.709915	0.102155	0.291187	0.248792	6.13668e-70
snp_sb042060523092	C/A	4	51302305	1.54167	1.19317	0.206406	0.0418651	0.126944	0.131329	0.485449	0.670208	0.869896	0.605496	0.162885	0.322332	0.270383	4.2424e-61
snp_sb042060523173	A/G	4	67967560	1.125	1.05669	0.0512393	0.025	0.0330556	0.0341954	0.29803	0.243697	0.777404	0.705678	0.104269	0.112604	0.106264	4.20173e-49
snp_sb042060523184	G/C	4	7922309	1.33333	1.10296	0.111587	0.05	0.067963	0.0703065	0.183118	0.264305	0.722222	0.622428	0.151653	0.180446	0.164165	1.29124e-42
snp_sb042060523191	G/C	4	7028919	1.54167	1.14165	0.166912	0.0503968	0.0977494	0.101134	0.275639	0.484428	0.755847	0.526443	0.224885	0.206609	0.185266	1.07735e-46
snp_sb042060523231	A/G	4	66858877	1.58333	1.16654	0.182844	0.055754	0.109629	0.113417	0.292992	0.491431	0.850247	0.705541	0.104338	0.372902	0.303374	1.94942e-58
snp_sb042060523233	C/T	4	9799696	1.66667	1.1984	0.226787	0.0514499	0.134962	0.13967	0.481023	0.618783	0.846935	0.598484	0.167722	0.332581	0.277276	1.28816e-57
snp_sb042060523235	C/T	4	56871103	1.54167	1.15871	0.176679	0.0698413	0.105249	0.108893	0.311261	0.336421	0.522069	0.279767	0.6436	0.14617	0.135487	3.39178e-23
snp_sb042060523468	C/T	4	4795132	1.375	1.13631	0.149841	0.0416667	0.0919444	0.0951149	0.603905	0.546828	0.846919	0.662202	0.127528	0.272798	0.235589	6.16994e-58
snp_sb042060523470	C/G	4	54084053	1.375	1.11399	0.1253	0.0501984	0.0751847	0.0777846	0.229649	0.332332	0.803251	0.705318	0.10445	0.255585	0.222923	2.22526e-52
snp_sb042060523489	A/G	4	828399	1.54167	1.1471	0.177626	0.0615079	0.103861	0.107456	0.345408	0.407783	0.724423	0.534668	0.21758	0.223431	0.19847	5.05501e-43
snp_sb042060523553	T/G	4	1553324	1.58333	1.23624	0.228791	0.0751984	0.144722	0.149719	0.415708	0.480393	0.840259	0.692572	0.110973	0.469957	0.359527	4.97954e-57
snp_sb042060523570	G/C	4	11593485	1.625	1.1963	0.212684	0.0501984	0.128333	0.132765	0.419788	0.608842	0.877142	0.685911	0.114479	0.409184	0.325468	4.54862e-62
snp_sb042060523656	G/C	4	10417765	1.58333	1.15658	0.186461	0.078373	0.109546	0.113344	0.187125	0.284565	0.655445	0.518397	0.232256	0.227559	0.201667	1.34313e-35
snp_sb042060523667	G/A	4	1162086	1.29167	1.18678	0.155428	0.0361111	0.105463	0.1091	0.581538	0.657594	0.888877	0.675464	0.120116	0.325638	0.272618	1.23588e-63
snp_sb042060523668	G/A	4	4203922	1.58333	1.20347	0.210879	0.0529762	0.129537	0.134011	0.43599	0.591033	0.808095	0.530758	0.221025	0.276538	0.238301	5.52762e-53
snp_sb042060523873	C/A	4	8819987	1.54167	1.17263	0.190388	0.0559524	0.114278	0.118245	0.480047	0.510384	0.884168	0.763423	0.0774724	0.482585	0.366141	4.78697e-63
snp_sb042060524376	A/G	4	67334755	1.70833	1.1934	0.236486	0.0698413	0.138583	0.143376	0.378617	0.496032	0.841808	0.686107	0.114375	0.440348	0.343395	2.80745e-57
snp_sb042060524400	T/A	4	61026228	1.66667	1.29571	0.291201	0.0728175	0.185472	0.191888	0.56125	0.607394	0.849645	0.617033	0.155164	0.484602	0.367182	1.98112e-58
snp_sb042060524403	A/C	4	61026598	1.66667	1.29571	0.291201	0.0728175	0.185472	0.191888	0.56125	0.607394	0.849645	0.617033	0.155164	0.484602	0.367182	1.98112e-58
snp_sb042060524408	C/G	4	5093767	1.20833	1.04435	0.0572659	0.0111111	0.0325926	0.0337165	0.342043	0.659091	0.883041	0.65692	0.130564	0.0952507	0.0907143	7.80336e-63
snp_sb042060524497	C/T	4	7965934	1.625	1.17582	0.207454	0.072619	0.122564	0.126805	0.365749	0.407502	0.597271	0.320286	0.530552	0.180446	0.164165	8.0681e-30
snp_sb042060524523	G/C	4	54044421	1.70833	1.14715	0.20122	0.0587302	0.112286	0.116173	0.302857	0.476961	0.860586	0.733454	0.090853	0.421773	0.332827	7.17346e-60
snp_sb042060524606	G/C	4	2232112	1.66667	1.2711	0.27387	0.0781746	0.172009	0.177954	0.496171	0.545519	0.837533	0.642522	0.139092	0.481529	0.365594	8.94897e-57
snp_sb042060524637	A/C	4	62987312	1.25	1.05315	0.0734713	0.0251984	0.0412032	0.0426314	0.221546	0.388436	0.873908	0.79382	0.0649328	0.200173	0.180138	1.06831e-61
snp_sb042060524643	G/C	4	54165068	1.66667	1.15798	0.204625	0.0501984	0.117407	0.121463	0.411535	0.572441	0.88291	0.726143	0.0942846	0.429295	0.337148	7.36475e-63
snp_sb042060524658	T/C	4	57808025	1.5	1.1802	0.203138	0.0615079	0.124463	0.128781	0.493328	0.505815	0.820688	0.637157	0.142368	0.343262	0.284348	1.26449e-54
snp_sb042060524860	T/C	4	58034623	1.375	1.06168	0.0932248	0.0277778	0.0497865	0.0515174	0.256573	0.442062	0.723162	0.503819	0.246209	0.100248	0.0952227	1.29124e-42
snp_sb042060524948	A/T	4	67727225	1.58333	1.15726	0.185326	0.0696429	0.108796	0.112555	0.216375	0.359876	0.840221	0.750394	0.0831585	0.436437	0.341199	4.3139e-57
snp_sb042060524958	C/A	4	67824325	1.625	1.14497	0.18293	0.0863095	0.103981	0.107574	0.179928	0.169949	0.687346	0.623332	0.15107	0.276538	0.238301	8.16739e-39
snp_sb042060524992	G/T	4	8013331	1.29167	1.09251	0.103085	0.025	0.0621296	0.064272	0.44573	0.597615	0.74358	0.362748	0.439184	0.097753	0.0929751	4.49563e-45
snp_sb042060525257	C/G	4	8776939	1.375	1.08502	0.114142	0.0194444	0.0648791	0.0671304	0.490563	0.700297	0.86694	0.556026	0.199619	0.14617	0.135487	1.38061e-60
snp_sb042060525579	T/A	4	50323796	1.70833	1.24376	0.259609	0.0646825	0.158815	0.164318	0.377885	0.592718	0.869558	0.679725	0.117796	0.496027	0.373006	3.66503e-61
snp_sb042060525591	C/T	4	52459901	1.66667	1.16176	0.209207	0.0587302	0.120297	0.124471	0.413841	0.511789	0.874945	0.743852	0.0860886	0.469957	0.359527	8.38233e-62
snp_sb042060525598	C/T	4	2084043	1.625	1.31087	0.277166	0.0777778	0.181481	0.187739	0.461032	0.571429	0.835932	0.617175	0.155071	0.473274	0.36128	2.09782e-56
snp_sb042060525651	A/C	4	3174760	1.45833	1.08123	0.109589	0.0390873	0.0598143	0.0618842	0.225972	0.346523	0.72785	0.583536	0.178423	0.143823	0.13348	2.2253e-43
snp_sb042060525654	T/C	4	11238954	1.25	1.06872	0.0737161	0.0277778	0.0437037	0.0452107	0.327203	0.364407	0.767772	0.634628	0.143932	0.119925	0.112734	6.15906e-48
snp_sb042060525659	A/G	4	8724606	1.375	1.13185	0.128466	0.0446429	0.0798143	0.0825739	0.316287	0.440666	0.611555	0.305523	0.56827	0.115052	0.108433	3.77128e-31
snp_sb042060526037	G/C	4	66209947	1.375	1.06401	0.0988225	0.030754	0.0528699	0.0547003	0.307129	0.418309	0.860828	0.760746	0.078625	0.221355	0.196856	6.60212e-60
snp_sb042060526107	G/A	4	3104408	1.58333	1.15082	0.172534	0.0559524	0.100342	0.103816	0.303654	0.442383	0.610879	0.302171	0.577345	0.143823	0.13348	3.75386e-31
snp_sb042060526113	A/G	4	52397341	1.125	1.035	0.0433009	0.00833333	0.0256481	0.0265326	0.516284	0.67509	0.936692	0.805153	0.0605002	0.131971	0.123262	1.80108e-70
snp_sb042060526457	G/T	4	61031917	1.66667	1.29571	0.291201	0.0728175	0.185472	0.191888	0.56125	0.607394	0.849645	0.617033	0.155164	0.484602	0.367182	1.98112e-58
snp_sb042060526464	T/G	4	8890484	1.29167	1.11128	0.105738	0.030754	0.0667588	0.0690681	0.377714	0.539327	0.774786	0.511119	0.239123	0.136735	0.127386	6.31184e-49
snp_sb042060526465	G/A	4	2547983	1.54167	1.14988	0.179598	0.0363095	0.106018	0.109681	0.452369	0.657516	0.847009	0.553291	0.201842	0.237743	0.209482	4.76131e-58
snp_sb042060526469	C/T	4	59126884	1.5	1.08648	0.129347	0.0394841	0.0697312	0.0721561	0.317453	0.433767	0.840522	0.718353	0.0980184	0.247732	0.217047	2.25212e-57
snp_sb042060526660	G/A	4	3286720	1.16667	1.07653	0.0710593	0.0138889	0.0458333	0.0474138	0.535239	0.69697	0.923779	0.74847	0.0840146	0.182669	0.165985	1.36739e-68
snp_sb042060526816	C/A	4	55937172	1.58333	1.23036	0.2484	0.0753968	0.155111	0.160486	0.483544	0.513918	0.848954	0.689258	0.112709	0.49924	0.37462	2.85915e-58
snp_sb042060526819	G/A	4	52708397	1.58333	1.16146	0.185424	0.0527778	0.109722	0.113506	0.372224	0.518987	0.843791	0.67525	0.120233	0.338549	0.281241	1.61801e-57
snp_sb042060526825	T/C	4	66343002	1.625	1.12102	0.175511	0.0646825	0.096593	0.0999498	0.226849	0.33036	0.835318	0.754073	0.0815328	0.393095	0.315833	1.21324e-56
snp_sb042060526831	T/C	4	52935586	1.70833	1.25622	0.268906	0.0698413	0.16562	0.171345	0.463199	0.578304	0.858495	0.664438	0.126258	0.493793	0.371877	1.47978e-59
snp_sb042060526832	C/T	4	57543695	1.33333	1.05821	0.0882127	0.030754	0.0474995	0.0491448	0.248932	0.352542	0.822702	0.726163	0.0942754	0.17373	0.158639	6.67098e-55
snp_sb042060526856	C/T	4	13907219	1.5	1.11247	0.151365	0.0390873	0.0853699	0.088321	0.427013	0.542142	0.84442	0.6602	0.128673	0.251674	0.220004	1.0641e-57
snp_sb042060526866	C/T	4	56514591	1.70833	1.2759	0.279165	0.0585317	0.174722	0.180754	0.533651	0.665	0.877025	0.632911	0.145	0.476397	0.36292	4.92753e-62
snp_sb042060526947	T/G	4	52572953	1.54167	1.14051	0.172825	0.0531746	0.100064	0.103529	0.385417	0.468595	0.812475	0.647114	0.136331	0.283925	0.243618	1.28895e-53
snp_sb042060526993	T/A	4	8615981	1.625	1.21691	0.234949	0.0365079	0.143953	0.148931	0.584398	0.74639	0.893013	0.578145	0.182418	0.341699	0.28332	2.3067e-64
snp_sb042060527001	A/C	4	49335014	1.58333	1.25378	0.249135	0.0642857	0.157889	0.16336	0.58228	0.592843	0.854967	0.64379	0.138325	0.442257	0.344461	4.83987e-59
snp_sb042060527014	A/G	4	7765270	1.375	1.11773	0.128944	0.0305556	0.0784259	0.0811303	0.360682	0.61039	0.913514	0.778018	0.0713293	0.353989	0.291335	4.14741e-67
snp_sb042060527016	G/A	4	68133678	1.41667	1.05367	0.0925998	0.0279762	0.0466662	0.0482827	0.33066	0.400504	0.881111	0.801686	0.061843	0.235721	0.207939	1.14048e-62
snp_sb042060527155	C/G	4	7298825	1.20833	1.06301	0.0638411	0.0390873	0.0387032	0.0400452	0.0854662	-0.00992347	0.659895	0.663237	0.126939	0.115052	0.108433	5.44595e-36
snp_sb042060527159	A/G	4	3750365	1.625	1.24019	0.243902	0.0835317	0.151768	0.157022	0.436898	0.44961	0.794444	0.626526	0.149026	0.406794	0.324053	3.19833e-51
snp_sb042060527219	C/T	4	56229088	1.58333	1.11536	0.160912	0.0363095	0.0893514	0.0924398	0.414754	0.593632	0.884763	0.716422	0.0989562	0.315628	0.265818	3.81415e-63
snp_sb042060527229	A/C	4	53539068	1.375	1.11077	0.12196	0.0418651	0.0728699	0.07539	0.318633	0.425482	0.57138	0.253949	0.73445	0.097753	0.0929751	2.02463e-27
snp_sb042060527304	G/A	4	2370128	2	1.96341	0.681696	0.941667	0.488981	0.505896	-0.914036	-0.925772	-0.883464	0.0219691	11.1296	0.499965	0.374983	7.52045e-63
snp_sb042060527381	T/G	4	5583523	1.54167	1.17438	0.19753	0.0555556	0.120185	0.12433	0.435497	0.53775	0.775225	0.513736	0.236631	0.247732	0.217047	7.87795e-49
snp_sb042060527393	C/G	4	6042229	1.70833	1.18395	0.214778	0.0724206	0.125185	0.129509	0.323585	0.42149	0.735876	0.543441	0.210031	0.274672	0.23695	3.08412e-44
snp_sb042060527402	C/T	4	67226016	1.70833	1.18073	0.229828	0.0811508	0.133157	0.137769	0.327334	0.390564	0.793341	0.660901	0.128271	0.393095	0.315833	3.26553e-51
snp_sb042060527447	G/A	4	7416807	1.45833	1.10736	0.136884	0.0222222	0.0781198	0.0808277	0.548917	0.715537	0.907208	0.6738	0.12103	0.239756	0.211015	3.36675e-66
snp_sb042060527554	T/A	4	54443892	1.375	1.19516	0.182704	0.0527778	0.118981	0.123084	0.628128	0.55642	0.806098	0.562869	0.194153	0.272798	0.235589	1.18627e-52
snp_sb042060527599	G/T	4	57913474	1.375	1.07912	0.105132	0.0361111	0.0593235	0.0613833	0.261589	0.391285	0.774326	0.629262	0.147291	0.160494	0.147614	1.56301e-48
snp_sb042060527670	T/C	4	47087479	1.20833	1.05741	0.0683143	0.0277778	0.0401852	0.0415709	0.25281	0.308756	0.735294	0.617059	0.155148	0.105213	0.0996784	4.10493e-44
snp_sb042060527671	A/C	4	56426361	1.08333	1.03574	0.0389978	0.00833333	0.024537	0.0253831	0.720497	0.660377	0.934305	0.806563	0.059957	0.127175	0.119089	4.02589e-70
snp_sb042060527837	G/C	4	49234735	1.70833	1.20994	0.238536	0.0890873	0.142037	0.146942	0.310159	0.372786	0.753105	0.606362	0.162295	0.361419	0.296107	3.16294e-46
snp_sb042060527853	A/G	4	4321084	1.70833	1.15781	0.204817	0.0501984	0.116213	0.12024	0.408112	0.568047	0.877897	0.717323	0.0985178	0.411542	0.326859	3.64263e-62
snp_sb042060528002	A/G	4	66789152	1.66667	1.30088	0.289371	0.0867063	0.185935	0.192367	0.442307	0.533674	0.822162	0.618641	0.154111	0.487834	0.368843	8.06536e-55
snp_sb042060528008	G/A	4	53075595	1.375	1.10491	0.129166	0.0529762	0.076018	0.0786467	0.235136	0.30311	0.79991	0.712881	0.100689	0.265225	0.230053	5.90017e-52
snp_sb042060528023	C/T	4	62292858	1.58333	1.12282	0.164041	0.0700397	0.0922312	0.0954319	0.165986	0.240607	0.762185	0.686836	0.113988	0.294772	0.251327	1.84433e-47
snp_sb042060528026	G/A	4	699735	1.5	1.20054	0.202114	0.0642857	0.127286	0.13169	0.377712	0.494952	0.800293	0.604577	0.163512	0.322332	0.270383	4.70186e-52
snp_sb042060528027	G/A	4	49117016	1.625	1.33123	0.297079	0.080754	0.194722	0.201444	0.577357	0.585285	0.819444	0.564626	0.192771	0.447797	0.347536	2.1972e-54
snp_sb042060528029	C/A	4	61176012	1.54167	1.21676	0.219814	0.0890873	0.139259	0.144068	0.311736	0.360275	0.791171	0.673564	0.12116	0.427185	0.335941	8.06701e-51
snp_sb042060528035	T/C	4	57293991	1.375	1.11717	0.129525	0.0585317	0.0780551	0.080754	0.150637	0.250123	0.761409	0.681827	0.116662	0.24575	0.215553	3.01535e-47
snp_sb042060528037	C/T	4	50667029	1.20833	1.0705	0.0692771	0.0224206	0.0431477	0.0446429	0.230421	0.480374	0.776156	0.569221	0.189197	0.100248	0.0952227	3.81468e-49
snp_sb042060528648	T/C	4	55068298	1.25	1.08338	0.0892869	0.0444444	0.0546296	0.0565134	0.194707	0.186441	0.759016	0.70379	0.105219	0.184884	0.167793	6.92519e-47
snp_sb042060530026	T/A	5	56076	1.16667	1.07092	0.0674895	0.0333333	0.0431198	0.0446208	0.347573	0.22696	0.667794	0.570261	0.188396	0.100248	0.0952227	1.4506e-36
snp_sb042060530063	C/G	5	78861	1.125	1.06454	0.0567679	0.0333333	0.0375926	0.0388889	0.130098	0.1133	0.649123	0.604288	0.16371	0.0952507	0.0907143	9.26761e-35
snp_sb042060530203	G/A	5	161481	1.5	1.17402	0.184748	0.0388889	0.113704	0.117625	0.470454	0.65798	0.921437	0.770296	0.0745508	0.494689	0.37233	3.22945e-68
snp_sb042060530387	C/T	5	246649	1.33333	1.09957	0.115718	0.0333333	0.0683333	0.0706897	0.491274	0.512195	0.865135	0.723526	0.0955299	0.247732	0.217047	2.22631e-60
snp_sb042060530447	C/G	5	290641	1.29167	1.11636	0.113853	0.0472222	0.0712037	0.073659	0.437931	0.336801	0.777741	0.664869	0.126014	0.212976	0.190296	3.87141e-49
snp_sb042060530540	G/C	5	357190	1.16667	1.07092	0.0674895	0.0333333	0.0431198	0.0446208	0.347573	0.22696	0.667794	0.570261	0.188396	0.100248	0.0952227	1.4506e-36
snp_sb042060530871	G/A	5	493303	1.54167	1.12274	0.167431	0.0363095	0.0950014	0.0983086	0.477735	0.6178	0.890651	0.713897	0.100191	0.332155	0.276992	6.14007e-64
snp_sb042060531270	G/C	5	782497	1.58333	1.13542	0.177779	0.0416667	0.101361	0.10487	0.519431	0.588926	0.854921	0.647073	0.136355	0.287571	0.246223	5.52824e-59
snp_sb042060531381	A/C	5	837686	1.5	1.14047	0.154421	0.0527778	0.0913889	0.0945402	0.389097	0.422492	0.723698	0.521561	0.22933	0.191953	0.17353	1.17306e-42
snp_sb042060531387	G/A	5	838249	1.5	1.13697	0.152009	0.0555556	0.0894444	0.0925287	0.36102	0.378882	0.705786	0.526316	0.225	0.189291	0.171375	8.9444e-41
snp_sb042060531480	G/C	5	919438	1.375	1.10752	0.138107	0.0388889	0.0808976	0.0837013	0.483718	0.519282	0.837614	0.662201	0.127529	0.239756	0.211015	1.09932e-56
snp_sb042060531545	G/T	5	960370	1.20833	1.09309	0.0919027	0.0416667	0.0587963	0.0608238	0.334059	0.291339	0.753148	0.651665	0.133633	0.169214	0.154898	3.4247e-46
snp_sb042060531826	G/A	5	1051109	1.45833	1.14692	0.157283	0.0277778	0.0951568	0.0984522	0.684447	0.708084	0.897339	0.648319	0.135612	0.270917	0.234219	8.32928e-65
snp_sb042060531827	C/T	5	1051275	1.29167	1.05866	0.0863061	0.0138889	0.0474717	0.0491227	0.687382	0.707428	0.871107	0.559449	0.196869	0.107685	0.101887	3.8741e-61
snp_sb042060532026	C/G	5	1244946	1.29167	1.03585	0.0611297	0.0166667	0.0307407	0.0318008	0.255806	0.457831	0.905055	0.824879	0.0530747	0.175976	0.160492	6.52734e-66
snp_sb042060532043	G/T	5	1251642	1.29167	1.06499	0.0736494	0.025	0.0419444	0.0433908	0.198663	0.403974	0.874804	0.78995	0.0664759	0.200173	0.180138	1.06831e-61
snp_sb042060532314	C/T	5	1303641	1.33333	1.08451	0.114575	0.0194444	0.065805	0.0680882	0.629685	0.704514	0.941942	0.803518	0.0611319	0.335368	0.279132	3.12277e-71
snp_sb042060532382	G/A	5	1327551	1.70833	1.13669	0.197034	0.05	0.108537	0.112306	0.411615	0.539329	0.879088	0.737531	0.0889688	0.41387	0.328226	2.93241e-62
snp_sb042060532449	G/A	5	1376483	1.70833	1.17596	0.214252	0.0638889	0.123815	0.128111	0.386087	0.483998	0.841394	0.692626	0.110945	0.403151	0.321886	3.54857e-57
snp_sb042060532497	G/A	5	1401611	1.16667	1.07267	0.067957	0.0305556	0.0435828	0.0450997	0.389366	0.298907	0.702822	0.576122	0.183936	0.102734	0.0974571	2.43422e-40
snp_sb042060532719	A/G	5	1668153	1.70833	1.24122	0.249439	0.0805556	0.153074	0.158379	0.312053	0.473749	0.836526	0.68936	0.112655	0.492489	0.371216	1.66168e-56
snp_sb042060533010	G/C	5	1836951	1.625	1.28256	0.272627	0.0722222	0.174278	0.180314	0.471114	0.585592	0.855535	0.651394	0.133792	0.499903	0.374952	4.85696e-59
snp_sb042060533013	T/G	5	1837165	1.58333	1.222	0.238795	0.0777778	0.147982	0.153111	0.435961	0.47441	0.836424	0.688777	0.112962	0.475788	0.362601	1.61389e-56
snp_sb042060533300	A/T	5	2132285	1.45833	1.15429	0.161167	0.05	0.098305	0.101709	0.492736	0.491379	0.791218	0.589513	0.174079	0.239756	0.211015	9.21376e-51
snp_sb042060533301	C/A	5	2132341	1.70833	1.28585	0.279396	0.0892857	0.175546	0.18164	0.500704	0.491383	0.821287	0.648629	0.135428	0.49961	0.374805	1.9876e-54
snp_sb042060533545	G/C	5	2343832	1.66667	1.1729	0.210178	0.0472222	0.121916	0.126134	0.564107	0.612666	0.831282	0.564413	0.192938	0.280247	0.240978	7.34656e-56
snp_sb042060533645	C/T	5	2355605	1.66667	1.1729	0.210178	0.0472222	0.121916	0.126134	0.564107	0.612666	0.831282	0.564413	0.192938	0.280247	0.240978	7.34656e-56
snp_sb042060533743	C/A	5	2370070	1.66667	1.1764	0.21259	0.05	0.123861	0.128146	0.549107	0.59632	0.822524	0.560355	0.196146	0.28209	0.242302	1.00244e-54
snp_sb042060533744	T/C	5	2370711	1.58333	1.10413	0.157827	0.0333333	0.0851568	0.0881074	0.490186	0.608565	0.794621	0.475317	0.275965	0.162382	0.149198	3.61136e-51
snp_sb042060533918	C/T	5	2495303	1.70833	1.16189	0.215487	0.0388889	0.121638	0.125847	0.596658	0.680291	0.887572	0.648342	0.135599	0.346366	0.286381	1.9263e-63
snp_sb042060534505	C/A	5	2743048	1.20833	1.06144	0.0686869	0.0361111	0.0413889	0.0428161	0.0663656	0.127517	0.786062	0.754794	0.0812161	0.169214	0.154898	3.68221e-50
snp_sb042060534693	C/T	5	2786350	1.25	1.09802	0.101742	0.0277778	0.0631481	0.0653257	0.693706	0.560117	0.849385	0.657602	0.130169	0.184884	0.167793	2.87332e-58
snp_sb042060534713	G/A	5	2788083	1.25	1.09802	0.101742	0.0277778	0.0631481	0.0653257	0.693706	0.560117	0.849385	0.657602	0.130169	0.184884	0.167793	2.87332e-58
snp_sb042060534904	T/C	5	2884719	1.625	1.21489	0.237094	0.0694444	0.145064	0.150081	0.46669	0.521285	0.850273	0.687231	0.113779	0.464246	0.356484	2.34685e-58
snp_sb042060534948	G/A	5	2895605	1.70833	1.2536	0.265471	0.0666667	0.164786	0.170483	0.489126	0.595436	0.866567	0.67018	0.123034	0.499686	0.374843	1.56023e-60
snp_sb042060535059	G/A	5	2915298	1.70833	1.2536	0.265471	0.0666667	0.164786	0.170483	0.489126	0.595436	0.866567	0.67018	0.123034	0.499686	0.374843	1.56023e-60
snp_sb042060535165	T/G	5	2948071	1.5	1.1134	0.143289	0.025	0.0811754	0.0839886	0.573159	0.692025	0.767992	0.246668	0.763508	0.107685	0.101887	7.13996e-48
snp_sb042060535457	T/C	5	3230122	1.54167	1.12922	0.170065	0.0305556	0.0972865	0.100655	0.570374	0.685922	0.894929	0.665462	0.125679	0.291187	0.248792	1.81225e-64
snp_sb042060535459	G/A	5	3230353	1.54167	1.12922	0.170065	0.0305556	0.0972865	0.100655	0.570374	0.685922	0.894929	0.665462	0.125679	0.291187	0.248792	1.81225e-64
snp_sb042060535744	T/C	5	3395205	1.625	1.14292	0.184569	0.05	0.104786	0.108414	0.404401	0.522839	0.735646	0.445985	0.310557	0.189291	0.171375	4.24921e-44
snp_sb042060535879	C/T	5	3505591	1.54167	1.10109	0.150294	0.025	0.0817593	0.0845785	0.584952	0.694224	0.882334	0.615188	0.15638	0.212976	0.190296	9.85843e-63
snp_sb042060536135	C/T	5	3589272	1.125	1.0742	0.06704	0.0194444	0.044537	0.0460728	0.66011	0.56341	0.834074	0.619951	0.153258	0.117492	0.11059	2.97298e-56
snp_sb042060536159	C/T	5	3590392	1.125	1.0742	0.06704	0.0194444	0.044537	0.0460728	0.66011	0.56341	0.834074	0.619951	0.153258	0.117492	0.11059	2.97298e-56
snp_sb042060536178	G/T	5	3591815	1.125	1.0742	0.06704	0.0194444	0.044537	0.0460728	0.66011	0.56341	0.834074	0.619951	0.153258	0.117492	0.11059	2.97298e-56
snp_sb042060536182	A/G	5	3603845	1.125	1.0742	0.06704	0.0194444	0.044537	0.0460728	0.66011	0.56341	0.834074	0.619951	0.153258	0.117492	0.11059	2.97298e-56
snp_sb042060536318	G/A	5	3658129	1.29167	1.08444	0.0962899	0.0305556	0.0571296	0.0590996	0.379142	0.465154	0.840036	0.700915	0.106677	0.191953	0.17353	7.1773e-57
snp_sb042060537108	C/G	5	4000839	1.70833	1.20245	0.237846	0.0611111	0.140574	0.145448	0.518654	0.565276	0.79626	0.531335	0.220513	0.300091	0.255064	2.25736e-51
snp_sb042060537202	A/C	5	4063933	1.20833	1.06109	0.0721702	0.0305556	0.042842	0.0443335	0.348659	0.286785	0.776515	0.686652	0.114086	0.136735	0.127386	6.31184e-49
snp_sb042060537346	C/T	5	4125105	1.66667	1.20938	0.228042	0.0611111	0.136824	0.141556	0.551309	0.553358	0.774146	0.494328	0.255737	0.270917	0.234219	1.13872e-48
snp_sb042060537367	T/A	5	4134450	1.625	1.12042	0.177739	0.0416667	0.0973337	0.100716	0.456561	0.571919	0.882207	0.724835	0.0949062	0.353989	0.291335	1.09225e-62
snp_sb042060537383	G/C	5	4145300	1.625	1.12042	0.177739	0.0416667	0.0973337	0.100716	0.456561	0.571919	0.882207	0.724835	0.0949062	0.353989	0.291335	1.09225e-62
snp_sb042060537385	T/C	5	4145404	1.625	1.12042	0.177739	0.0416667	0.0973337	0.100716	0.456561	0.571919	0.882207	0.724835	0.0949062	0.353989	0.291335	1.09225e-62
snp_sb042060537479	C/A	5	4193575	1.33333	1.09275	0.107538	0.0416667	0.0637963	0.0659962	0.320365	0.34688	0.76562	0.641138	0.139932	0.178215	0.162335	1.12518e-47
snp_sb042060537810	A/C	5	4808014	1.54167	1.16766	0.19412	0.0361111	0.11599	0.120004	0.631737	0.688671	0.882904	0.623885	0.150715	0.3088	0.261122	8.55608e-63
snp_sb042060538677	T/G	5	5262794	1.58333	1.19193	0.210698	0.0555556	0.128148	0.132567	0.432979	0.566474	0.746032	0.41418	0.353602	0.219272	0.195232	2.36554e-45
snp_sb042060539567	C/A	5	5547790	1.75	1.30824	0.295686	0.138889	0.187564	0.194046	0.261092	0.259513	0.710696	0.609306	0.160303	0.480443	0.36503	2.89064e-41
snp_sb042060539604	T/G	5	5549204	1.70833	1.26791	0.27263	0.125	0.169879	0.175751	0.265627	0.264182	0.749981	0.660216	0.128664	0.499938	0.374969	9.60466e-46
snp_sb042060539607	A/G	5	5549577	1.66667	1.24875	0.260752	0.119444	0.161546	0.16713	0.337285	0.260615	0.670403	0.554228	0.201078	0.362881	0.29704	6.44032e-37
snp_sb042060539616	T/C	5	5554783	1.33333	1.11708	0.127105	0.0563492	0.078167	0.0808885	0.261247	0.279118	0.796755	0.718061	0.0981597	0.275288	0.237396	2.15476e-51
snp_sb042060539806	T/A	5	5678788	1.25	1.13657	0.124849	0.0527778	0.0821013	0.0849465	0.485477	0.357163	0.649993	0.455529	0.298813	0.150841	0.139464	9.13129e-35
snp_sb042060539890	G/A	5	5712336	1.66667	1.16514	0.210736	0.0638889	0.120667	0.124854	0.471029	0.470536	0.860899	0.737279	0.0890847	0.459637	0.354004	8.90052e-60
snp_sb042060539931	G/A	5	5734445	1.66667	1.14553	0.191372	0.0527778	0.107149	0.110869	0.49767	0.507433	0.877843	0.751999	0.0824474	0.432403	0.338917	4.35455e-62
snp_sb042060539990	T/C	5	5752779	1.66667	1.29396	0.302499	0.0861111	0.191361	0.197973	0.593011	0.550006	0.823983	0.608847	0.160612	0.48951	0.3697	6.73775e-55
snp_sb042060539991	C/T	5	5752947	1.625	1.30408	0.29557	0.0777778	0.190204	0.196789	0.61229	0.591082	0.844441	0.619583	0.153497	0.499996	0.374998	1.45979e-57
snp_sb042060540037	C/A	5	5785478	1.25	1.12708	0.116065	0.0444444	0.0760828	0.0787204	0.447746	0.415841	0.700641	0.487539	0.262779	0.148509	0.137482	3.89006e-40
snp_sb042060540264	A/T	5	5812329	1.33333	1.12288	0.132047	0.0388889	0.0816667	0.0844828	0.421209	0.52381	0.798706	0.577283	0.183064	0.193667	0.174914	9.95808e-52
snp_sb042060541082	C/G	5	6039745	1.58333	1.19509	0.226402	0.0416667	0.137101	0.141843	0.641431	0.696088	0.916587	0.725534	0.0945736	0.499441	0.374721	1.59535e-67
snp_sb042060541094	T/C	5	6044129	1.66667	1.13679	0.188398	0.05	0.104416	0.108031	0.518331	0.521147	0.824797	0.63412	0.144247	0.285752	0.244925	5.09827e-55
snp_sb042060541204	A/G	5	6104461	1.5	1.14896	0.173099	0.0638889	0.103027	0.106594	0.359385	0.379883	0.851365	0.760311	0.078813	0.430339	0.337743	1.66148e-58
snp_sb042060541372	G/T	5	6176881	1.58333	1.1724	0.198482	0.0777778	0.117935	0.122015	0.276721	0.340501	0.806239	0.7062	0.104007	0.401921	0.321151	1.20255e-52
snp_sb042060541983	A/G	5	6677866	1.66667	1.18263	0.221415	0.0724206	0.129546	0.134033	0.439642	0.440966	0.786861	0.618737	0.154049	0.340128	0.282284	2.71905e-50
snp_sb042060541993	C/T	5	6686439	1.41667	1.11189	0.13943	0.0418651	0.0818608	0.084704	0.421561	0.488582	0.683183	0.380512	0.40701	0.131971	0.123262	2.39714e-38
snp_sb042060542149	C/T	5	6766032	1.29167	1.08415	0.0956664	0.0390873	0.0574069	0.0593938	0.275524	0.319119	0.751915	0.635642	0.143303	0.157789	0.14534	3.64137e-46
snp_sb042060542508	T/G	5	6943755	1.54167	1.10843	0.15534	0.00277778	0.0852494	0.0882032	0.920424	0.967416	0.983122	0.48202	0.268651	0.165081	0.151456	3.16944e-77
snp_sb042060542580	A/G	5	6955761	1.375	1.10924	0.118453	0.0388889	0.0712963	0.0737548	0.364654	0.454545	0.840091	0.706834	0.10369	0.24376	0.21405	4.9025e-57
snp_sb042060542581	G/C	5	6956170	1.70833	1.15873	0.197975	0.0722222	0.113305	0.117226	0.240308	0.362586	0.781206	0.656748	0.130664	0.330537	0.27591	1.55939e-49
snp_sb042060542747	A/C	5	6992019	1.75	1.18756	0.224894	0.0918651	0.130935	0.13547	0.228063	0.298391	0.708667	0.584765	0.177522	0.315628	0.265818	4.07897e-41
snp_sb042060543281	A/T	5	7304568	1.625	1.18154	0.218615	0.0638889	0.129371	0.133858	0.374588	0.506157	0.822371	0.640313	0.140434	0.359948	0.295167	1.07847e-54
snp_sb042060543510	T/G	5	7375869	1.5	1.11406	0.144086	0.0948413	0.0823791	0.0852338	-0.08467	-0.151279	0.340426	0.427095	0.33535	0.143823	0.13348	9.77074e-11
snp_sb042060544128	T/A	5	7599693	1.41667	1.14828	0.155104	0.0224206	0.0952868	0.0985929	0.647292	0.764704	0.872624	0.458658	0.295069	0.175976	0.160492	1.65585e-61
snp_sb042060544847	C/T	5	7912927	1.66667	1.18676	0.224443	0.0805556	0.132334	0.136923	0.371036	0.39127	0.827965	0.717388	0.0984865	0.468576	0.358794	2.04394e-55
snp_sb042060545082	G/T	5	8034283	1.41667	1.12965	0.140349	0.0305556	0.084537	0.0874521	0.4939	0.638554	0.892144	0.701597	0.10633	0.287736	0.24634	5.3351e-63
snp_sb042060545153	C/T	5	8067863	1.70833	1.14614	0.18759	0.0863095	0.104722	0.10834	0.138755	0.17582	0.64818	0.573127	0.186204	0.24575	0.215553	1.02958e-34
snp_sb042060545253	G/C	5	8222630	1.29167	1.15493	0.131189	0.0416667	0.0873148	0.0903257	0.434819	0.5228	0.799907	0.580695	0.180519	0.208739	0.186953	7.05723e-52
snp_sb042060545454	G/A	5	8331181	1.58333	1.20766	0.220024	0.0724206	0.135185	0.139854	0.346625	0.464284	0.837078	0.69588	0.109258	0.445062	0.346022	1.12377e-56
snp_sb042060545803	G/C	5	8561726	1.375	1.14543	0.13013	0.0613095	0.0827773	0.085639	0.142928	0.259344	0.543087	0.383097	0.402576	0.134356	0.125331	6.67213e-25
snp_sb042060545830	A/G	5	8563133	1.375	1.14543	0.13013	0.0613095	0.0827773	0.085639	0.142928	0.259344	0.543087	0.383097	0.402576	0.134356	0.125331	6.67213e-25
snp_sb042060545929	G/T	5	8589549	1.5	1.10691	0.141023	0.0446429	0.0791756	0.0819262	0.304336	0.436154	0.849327	0.732777	0.0911679	0.296553	0.252581	2.56146e-58
snp_sb042060546308	A/G	5	8667385	1.58333	1.19829	0.209221	0.0833333	0.127564	0.131977	0.390809	0.346734	0.797093	0.689395	0.112637	0.409184	0.325468	2.26741e-51
snp_sb042060546461	T/C	5	8736098	1.41667	1.17761	0.175721	0.025	0.111574	0.115421	0.652363	0.775934	0.923069	0.656658	0.130715	0.325638	0.272618	1.74964e-68
snp_sb042060546680	T/C	5	8789022	1.33333	1.09069	0.105196	0.0527778	0.0619444	0.0640805	0.118724	0.147982	0.723698	0.675708	0.119982	0.191483	0.17315	8.80099e-43
snp_sb042060546797	G/A	5	8842095	1.41667	1.13223	0.139658	0.055754	0.0848143	0.0877463	0.270641	0.342635	0.745298	0.612541	0.158136	0.219272	0.195232	2.36554e-45
snp_sb042060546922	A/G	5	8867520	1.29167	1.14081	0.128003	0.0333333	0.0833333	0.0862069	0.4711	0.6	0.855769	0.639423	0.140977	0.231656	0.204823	4.05892e-59
snp_sb042060547035	T/C	5	8893592	1.33333	1.08762	0.0985788	0.0277778	0.057963	0.0599617	0.26883	0.520767	0.870541	0.729862	0.0925305	0.215082	0.191952	4.08967e-61
snp_sb042060547229	G/A	5	8989765	1.375	1.13645	0.138057	0.0529762	0.0858329	0.0887999	0.340156	0.382798	0.750836	0.5963	0.169252	0.212976	0.190296	5.25782e-46
snp_sb042060547252	A/G	5	9015982	1.41667	1.15661	0.156577	0.0640873	0.0982403	0.101635	0.246792	0.347647	0.704411	0.546888	0.207132	0.217181	0.193597	1.06417e-40
snp_sb042060547334	G/A	5	9048718	1.41667	1.10292	0.125161	0.0474206	0.0723143	0.0748153	0.302692	0.344243	0.809764	0.709898	0.102163	0.249707	0.21853	3.32067e-53
snp_sb042060547520	A/T	5	9079943	1.41667	1.12731	0.129006	0.0666667	0.0783333	0.0810345	0.101658	0.148936	0.588415	0.516387	0.234133	0.162382	0.149198	7.42731e-29
snp_sb042060547522	A/G	5	9080179	1.33333	1.03229	0.0602867	0.0194444	0.0287963	0.0297893	0.177842	0.324759	0.887798	0.833834	0.0498198	0.17373	0.158639	1.71986e-63
snp_sb042060547604	C/A	5	9120658	1.625	1.16565	0.190446	0.0694444	0.111175	0.115023	0.342872	0.375361	0.741546	0.586235	0.17645	0.269027	0.232839	8.53056e-45
snp_sb042060547606	A/G	5	9120850	1.625	1.19137	0.198757	0.0722222	0.119786	0.123931	0.348082	0.397075	0.783322	0.640621	0.140246	0.333765	0.278066	8.57935e-50
snp_sb042060547662	T/G	5	9124183	1.33333	1.06963	0.082707	0.025	0.0465741	0.0481801	0.256247	0.463221	0.901206	0.81595	0.0563912	0.253633	0.221468	2.29767e-65
snp_sb042060547667	C/G	5	9124516	1.33333	1.06641	0.0793673	0.0222222	0.0442593	0.0457854	0.302543	0.497908	0.911499	0.823735	0.0534955	0.251674	0.220004	7.96463e-67
snp_sb042060547850	T/G	5	9177619	1.33333	1.02907	0.056947	0.0166667	0.0264815	0.0273946	0.224138	0.370629	0.902562	0.845182	0.0457942	0.171476	0.156774	1.46942e-65
snp_sb042060547851	C/G	5	9177815	1.79167	1.23567	0.251403	0.175198	0.151388	0.156616	-0.0979622	-0.157278	0.495582	0.564134	0.193157	0.347906	0.287387	5.99519e-21
snp_sb042060547896	G/A	5	9181225	1.33333	1.09211	0.0949861	0.0694444	0.0569444	0.058908	-0.00210728	-0.219512	0.679481	0.737175	0.0891326	0.217181	0.193597	6.47473e-38
snp_sb042060547937	A/T	5	9375832	1.625	1.30053	0.273187	0.108532	0.17787	0.184011	0.268342	0.389825	0.757336	0.602305	0.165072	0.447797	0.347536	1.05469e-46
snp_sb042060548000	T/A	5	9410603	1.66667	1.2068	0.235485	0.0835317	0.141102	0.146007	0.35906	0.408004	0.830431	0.713563	0.100354	0.492746	0.371347	2.34478e-55
snp_sb042060548142	T/C	5	9478160	1.58333	1.16401	0.181875	0.0418651	0.108218	0.111989	0.410656	0.61314	0.897366	0.734701	0.0902745	0.407993	0.324764	7.30078e-65
snp_sb042060548432	T/C	5	9987365	1.45833	1.12124	0.143341	0.0446429	0.0840736	0.08698	0.388779	0.469003	0.878235	0.770686	0.0743865	0.367222	0.299796	3.14237e-62
snp_sb042060548842	C/T	5	10186122	1.79167	1.29542	0.310479	0.106548	0.192811	0.199606	0.392151	0.447399	0.785226	0.61134	0.158938	0.495679	0.37283	2.19981e-49
snp_sb042060548843	T/G	5	10187000	1.79167	1.32417	0.320926	0.10873	0.202657	0.209659	0.404147	0.463476	0.779066	0.588211	0.175017	0.491791	0.370862	2.57927e-49
snp_sb042060548911	A/G	5	10227989	1.75	1.26825	0.276484	0.0769078	0.171367	0.177365	0.443547	0.551209	0.842645	0.64938	0.134983	0.487697	0.368773	2.2634e-57
snp_sb042060549025	T/C	5	10354468	1.75	1.2422	0.260756	0.0751984	0.158981	0.16447	0.393582	0.526998	0.849405	0.681618	0.116774	0.49924	0.37462	2.85915e-58
snp_sb042060549031	A/G	5	10354865	1.75	1.2422	0.260756	0.0751984	0.158981	0.16447	0.393582	0.526998	0.849405	0.681618	0.116774	0.49924	0.37462	2.85915e-58
snp_sb042060549032	T/C	5	10355122	1.75	1.2422	0.260756	0.0751984	0.158981	0.16447	0.393582	0.526998	0.849405	0.681618	0.116774	0.49924	0.37462	2.85915e-58
snp_sb042060549355	A/C	5	10420339	1.79167	1.28065	0.302564	0.116865	0.186644	0.193119	0.304155	0.373859	0.766194	0.626591	0.148984	0.49981	0.374905	1.01328e-47
snp_sb042060549621	T/C	5	10490297	1.66667	1.19077	0.214991	0.0779762	0.127694	0.132118	0.316586	0.389352	0.798067	0.669313	0.123517	0.386558	0.311845	1.11869e-51
snp_sb042060550342	C/T	5	10759375	1.41667	1.05729	0.0956019	0.0253968	0.0489531	0.0506553	0.383785	0.481201	0.889272	0.786568	0.0678363	0.229611	0.20325	6.46914e-64
snp_sb042060550346	C/T	5	10759615	1.5	1.06931	0.115236	0.0309524	0.0591383	0.0611917	0.369417	0.47661	0.869661	0.75097	0.0829026	0.237743	0.209482	3.35861e-61
snp_sb042060550468	G/C	5	10819844	1.54167	1.13919	0.175105	0.0670635	0.101268	0.104774	0.359347	0.337762	0.618653	0.424155	0.339407	0.175976	0.160492	7.11826e-32
snp_sb042060552043	G/T	5	11791098	1.875	1.23057	0.296162	0.170238	0.171037	0.176961	-0.0402228	0.00467336	0.284	0.280638	0.640828	0.237743	0.209482	6.46213e-08
snp_sb042060552117	G/C	5	11810217	1.25	1.05382	0.0689981	0.00833333	0.0391667	0.0405172	0.482759	0.787234	0.938898	0.712823	0.100718	0.136735	0.127386	8.54955e-71
snp_sb042060552348	C/G	5	11931276	1.45833	1.13863	0.159316	0.0472222	0.0956047	0.0989372	0.467437	0.506068	0.870874	0.738575	0.0884895	0.365783	0.298885	4.025e-61
snp_sb042060553296	C/T	5	12278413	1.70833	1.18572	0.228347	0.0615079	0.133118	0.137752	0.416478	0.537944	0.875333	0.730191	0.0923762	0.493478	0.371718	7.65365e-62
snp_sb042060553397	A/C	5	12304818	1.33333	1.06826	0.0981471	0.0281746	0.0544161	0.0563066	0.386237	0.482238	0.83114	0.673866	0.120994	0.166945	0.153009	3.8912e-56
snp_sb042060553406	A/G	5	12306344	1.33333	1.06826	0.0981471	0.0281746	0.0544161	0.0563066	0.386237	0.482238	0.83114	0.673866	0.120994	0.166945	0.153009	3.8912e-56
snp_sb042060555458	A/C	5	13319266	1.5	1.12303	0.15368	0.0503968	0.0881198	0.0911725	0.398129	0.428087	0.811106	0.669714	0.123293	0.26713	0.231451	1.88211e-53
snp_sb042060555557	T/C	5	13370696	1.54167	1.18806	0.201698	0.0501984	0.123518	0.127785	0.460499	0.593595	0.89193	0.734082	0.0905613	0.464987	0.356881	4.18831e-64
snp_sb042060556188	G/A	5	14317684	1.5	1.13756	0.156385	0.0559524	0.0921939	0.0953871	0.354515	0.393101	0.817547	0.699368	0.107466	0.307074	0.259927	2.97719e-54
snp_sb042060557081	A/C	5	14741059	1.54167	1.12916	0.161996	0.0501984	0.0925921	0.0957923	0.403596	0.457854	0.854829	0.73223	0.091423	0.33971	0.282009	7.98762e-58
snp_sb042060557085	T/G	5	14746358	1.54167	1.12288	0.15454	0.0501984	0.0877773	0.0908114	0.35251	0.428116	0.834368	0.710375	0.101927	0.29556	0.251882	6.3081e-55
snp_sb042060557691	G/A	5	15054775	1.25	1.06857	0.0739539	0.0418651	0.0437958	0.0453134	0.162965	0.0440851	0.64328	0.626828	0.148833	0.117492	0.11059	2.7751e-34
snp_sb042060558071	A/G	5	15396398	1.625	1.16954	0.209847	0.0613095	0.122509	0.126754	0.450687	0.499551	0.814331	0.628995	0.14746	0.330537	0.27591	9.5964e-54
snp_sb042060558638	T/G	5	15718345	1.625	1.15038	0.202745	0.0615079	0.115898	0.119908	0.377335	0.469291	0.759055	0.545994	0.20788	0.255585	0.222923	4.86106e-47
snp_sb042060558793	A/T	5	15793544	1.70833	1.24167	0.249628	0.0890873	0.153518	0.158819	0.297018	0.419695	0.821775	0.692877	0.110815	0.49981	0.374905	1.19692e-54
snp_sb042060558797	T/C	5	15793625	1.66667	1.21995	0.226369	0.0787698	0.138919	0.143779	0.296224	0.432979	0.842238	0.721771	0.09637	0.499117	0.374558	4.22523e-57
snp_sb042060558833	G/C	5	15796779	1.54167	1.17093	0.191129	0.0587302	0.115435	0.119429	0.35998	0.491226	0.880687	0.76549	0.0765883	0.492489	0.371216	1.38252e-62
snp_sb042060559471	T/C	5	15914950	1.375	1.09776	0.118096	0.0388889	0.0683333	0.0706897	0.458773	0.430894	0.766472	0.589658	0.173975	0.166945	0.153009	8.87732e-48
snp_sb042060563433	G/T	5	20286983	1.29167	1.11146	0.106773	0.0638889	0.0667593	0.0690613	0.118479	0.0429958	0.599913	0.581938	0.179599	0.16009	0.147275	6.26766e-30
snp_sb042060575139	T/C	5	51187048	1.58333	1.22921	0.23742	0.0888889	0.148305	0.153433	0.409433	0.400635	0.809172	0.681617	0.116775	0.464987	0.356881	6.05615e-53
snp_sb042060577155	G/C	5	51895997	1.625	1.22005	0.227506	0.0863095	0.139843	0.144711	0.385371	0.38281	0.82447	0.715599	0.0993578	0.491791	0.370862	5.28403e-55
snp_sb042060577167	A/G	5	51904100	1.625	1.21555	0.223019	0.0946429	0.136972	0.141742	0.296858	0.309037	0.808183	0.722392	0.0960727	0.493478	0.371718	6.45996e-53
snp_sb042060578352	C/G	5	52530973	1.5	1.16065	0.168949	0.0668651	0.102569	0.106146	0.319814	0.348099	0.803471	0.69853	0.107895	0.340128	0.282284	2.48132e-52
snp_sb042060578519	C/T	5	52600179	1.45833	1.18507	0.174174	0.0890873	0.110676	0.114539	0.193697	0.195062	0.677903	0.599849	0.166771	0.274672	0.23695	1.67098e-37
snp_sb042060579831	C/G	5	52917039	1.5	1.16065	0.168949	0.0668651	0.102569	0.106146	0.319814	0.348099	0.803471	0.69853	0.107895	0.340128	0.282284	2.48132e-52
snp_sb042060580806	G/T	5	53303425	1.20833	1.10267	0.0904777	0.05	0.0588889	0.0609195	0.240624	0.150943	0.662465	0.602459	0.164966	0.148509	0.137482	3.95728e-36
snp_sb042060581726	A/T	5	53534119	1.5	1.13896	0.16101	0.055754	0.095162	0.0984834	0.326301	0.414115	0.794455	0.649171	0.135107	0.270917	0.234219	3.39839e-51
snp_sb042060582236	C/T	5	53705748	1.45833	1.15891	0.158593	0.0696429	0.0984028	0.101836	0.238351	0.292267	0.754962	0.65377	0.132398	0.283925	0.243618	2.18451e-46
snp_sb042060582256	T/C	5	53714735	1.54167	1.15652	0.178358	0.0613095	0.106458	0.110169	0.358494	0.424098	0.83434	0.712346	0.100953	0.370078	0.301599	2.6629e-56
snp_sb042060582263	A/C	5	53717144	1.45833	1.15891	0.158593	0.0696429	0.0984028	0.101836	0.238351	0.292267	0.754962	0.65377	0.132398	0.283925	0.243618	2.18451e-46
snp_sb042060582384	C/A	5	53761342	1.66667	1.21275	0.240586	0.0805556	0.145234	0.150278	0.379535	0.445341	0.835793	0.70395	0.105139	0.490301	0.370104	2.07152e-56
snp_sb042060582440	T/C	5	53787761	1.20833	1.04636	0.0653791	0.0194444	0.0367593	0.0380268	0.44695	0.471033	0.902626	0.815916	0.0564041	0.200173	0.180138	1.4423e-65
snp_sb042060582731	T/C	5	54651283	1.16667	1.03384	0.0490177	0.0194444	0.0271296	0.0280651	0.308687	0.283276	0.862201	0.807738	0.0595065	0.141468	0.131461	5.49303e-60
snp_sb042060582925	T/G	5	55234764	1.58333	1.20317	0.207203	0.0751984	0.128342	0.132788	0.262799	0.414079	0.816336	0.686538	0.114146	0.407993	0.324764	7.0277e-54
snp_sb042060583176	C/T	5	55326652	1.5	1.18946	0.189517	0.0724206	0.11862	0.122731	0.29017	0.389474	0.819386	0.704167	0.105029	0.399438	0.319663	2.88214e-54
snp_sb042060583181	T/C	5	55332124	1.625	1.26461	0.254829	0.0972222	0.16213	0.16772	0.255832	0.400343	0.803	0.67148	0.122312	0.493156	0.371555	3.45253e-52
snp_sb042060583521	G/A	5	55595382	1.5	1.18258	0.184289	0.0668651	0.114546	0.118516	0.297577	0.41626	0.834257	0.716067	0.0991291	0.401921	0.321151	3.32796e-56
snp_sb042060583918	C/A	5	55856419	1.45833	1.16133	0.162734	0.0668651	0.101232	0.104769	0.209386	0.339484	0.778464	0.664602	0.126165	0.300091	0.255064	4.36764e-49
snp_sb042060584047	C/A	5	55906175	1.41667	1.14495	0.146455	0.0640873	0.0911806	0.0943646	0.164688	0.297139	0.793744	0.706548	0.103833	0.3088	0.261122	5.74271e-51
snp_sb042060584688	C/T	5	56013377	1.41667	1.15189	0.154286	0.0640873	0.0963242	0.0996921	0.225591	0.334671	0.783886	0.675177	0.120273	0.294772	0.251327	9.48313e-50
snp_sb042060585744	T/C	5	57236390	1.20833	1.10129	0.0901029	0.05	0.0585185	0.0605364	0.233844	0.14557	0.662465	0.604959	0.163251	0.148509	0.137482	3.95728e-36
snp_sb042060585745	C/T	5	57236570	1.33333	1.09584	0.104953	0.0418651	0.063176	0.0654009	0.213084	0.337326	0.805565	0.706591	0.103812	0.212976	0.190296	2.23219e-52
snp_sb042060586925	C/A	5	57853962	1.375	1.06723	0.102162	0.0224206	0.0551847	0.057095	0.449127	0.593717	0.869046	0.677679	0.118906	0.171476	0.156774	4.70261e-61
snp_sb042060587348	C/G	5	57995949	1.58333	1.21793	0.224543	0.0613095	0.139444	0.14426	0.436711	0.560329	0.875695	0.717277	0.0985404	0.493478	0.371718	7.65365e-62
snp_sb042060587478	A/G	5	58078499	1.5	1.15228	0.176543	0.0446429	0.105185	0.108819	0.501285	0.575577	0.890739	0.742565	0.0866707	0.409184	0.325468	5.94515e-64
snp_sb042060588585	C/T	5	59436191	1.5	1.15298	0.17016	0.0615079	0.101453	0.104966	0.387865	0.393731	0.542187	0.244869	0.770952	0.134356	0.125331	6.67213e-25
snp_sb042060588588	T/G	5	59438013	1.20833	1.07526	0.0774018	0.0305556	0.0476852	0.0493295	0.456744	0.359223	0.749613	0.609244	0.160345	0.122349	0.114865	8.87675e-46
snp_sb042060589221	A/C	5	59618948	1.58333	1.22921	0.224566	0.0781746	0.14076	0.145639	0.322547	0.444623	0.819487	0.674971	0.120386	0.433423	0.339495	1.92683e-54
snp_sb042060589525	T/A	5	59697129	1.70833	1.34996	0.322275	0.100595	0.209236	0.216491	0.40224	0.519226	0.798744	0.581391	0.180003	0.49981	0.374905	8.07224e-52
snp_sb042060589586	T/G	5	59699399	1.70833	1.34996	0.322275	0.100595	0.209236	0.216491	0.40224	0.519226	0.798744	0.581391	0.180003	0.49981	0.374905	8.07224e-52
snp_sb042060589677	G/C	5	59776476	1.70833	1.31819	0.304859	0.0918651	0.194816	0.201565	0.379731	0.528453	0.81554	0.60882	0.16063	0.498122	0.374059	7.44922e-54
snp_sb042060589862	G/A	5	59844243	1.70833	1.34525	0.319412	0.0974206	0.20649	0.213631	0.420529	0.528208	0.796265	0.568169	0.19001	0.477592	0.363545	2.20952e-51
snp_sb042060591481	G/C	5	61061450	1.29167	1.07992	0.099471	0.0365079	0.0580745	0.0601031	0.343713	0.37136	0.80034	0.682394	0.116357	0.182669	0.165985	4.04225e-52
snp_sb042060593272	A/T	5	61341578	1.375	1.16054	0.15487	0.0446429	0.0986201	0.102041	0.51567	0.547325	0.830337	0.625198	0.149873	0.263313	0.228646	8.00882e-56
snp_sb042060593418	T/C	5	61407228	1.08333	1.04866	0.043743	0.0194444	0.0289815	0.0299808	0.497608	0.329073	0.834074	0.752691	0.0821415	0.117492	0.11059	2.97298e-56
snp_sb042060593706	C/G	5	61608313	1.33333	1.13811	0.136501	0.0333333	0.0857407	0.0886973	0.656983	0.611231	0.853171	0.622323	0.15172	0.227559	0.201667	9.03175e-59
snp_sb042060593709	A/G	5	61608427	1.25	1.11038	0.0997549	0.0444444	0.0640741	0.0662835	0.303761	0.306358	0.709091	0.580606	0.180585	0.153165	0.141435	3.8241e-41
snp_sb042060593711	T/G	5	61608548	1.33333	1.13542	0.132478	0.0444444	0.0833333	0.0862069	0.477821	0.466667	0.796825	0.619048	0.153846	0.219272	0.195232	1.71659e-51
snp_sb042060593929	G/C	5	61641355	1.58333	1.11532	0.162026	0.0420635	0.0898791	0.0929925	0.34329	0.531999	0.729353	0.421696	0.342845	0.155481	0.143394	1.17772e-43
snp_sb042060593970	G/C	5	61659812	1.20833	1.0867	0.0815844	0.0361111	0.0521296	0.0539272	0.248328	0.307282	0.725666	0.603974	0.163925	0.131971	0.123262	5.21367e-43
snp_sb042060594036	C/T	5	61672309	1.375	1.09004	0.106372	0.0416667	0.0612037	0.0633142	0.218903	0.319213	0.879999	0.823731	0.053497	0.347906	0.287387	2.10278e-62
snp_sb042060594167	A/G	5	61772247	1.70833	1.21219	0.229424	0.0890873	0.138148	0.142919	0.232436	0.35513	0.783215	0.663832	0.126601	0.411542	0.326859	7.66766e-50
snp_sb042060594735	C/T	5	61927575	1.25	1.02027	0.0406522	0.0138889	0.0186111	0.0192529	0.137931	0.253731	0.958502	0.944393	0.0147204	0.335368	0.279132	1.06195e-73
snp_sb042060595042	G/C	5	62000875	1.625	1.50046	0.366841	0.474267	0.258103	0.267463	-0.706498	-0.837515	-0.310846	0.286621	0.622233	0.358887	0.294487	9.28127e-09
snp_sb042060595322	G/C	5	62099281	1.58333	1.16993	0.184916	0.0666667	0.109972	0.113778	0.250163	0.393783	0.865863	0.778732	0.0710348	0.497172	0.373582	1.92688e-60
snp_sb042060595782	T/C	5	62296740	1.29167	1.07771	0.087499	0.0390873	0.0512958	0.053072	0.223744	0.238002	0.72785	0.642847	0.138895	0.143823	0.13348	2.2253e-43
snp_sb042060595913	A/G	5	62364340	1.54167	1.11569	0.157489	0.0587302	0.0880272	0.0910767	0.341201	0.332818	0.792883	0.689564	0.112548	0.283925	0.243618	3.79931e-51
snp_sb042060596180	G/A	5	62394921	1.58333	1.08796	0.139913	0.0418651	0.0732403	0.0757731	0.256823	0.428387	0.902585	0.829579	0.0513575	0.430339	0.337743	1.3014e-65
snp_sb042060596795	G/C	5	62686109	1.41667	1.05783	0.0924123	0.030754	0.0478699	0.0495279	0.140769	0.357551	0.75788	0.623129	0.151201	0.127175	0.119089	6.68544e-47
snp_sb042060596883	C/A	5	62738399	1.70833	1.20053	0.238526	0.0865079	0.14099	0.145866	0.314675	0.386426	0.641767	0.416154	0.350739	0.241762	0.212537	3.98171e-34
snp_sb042060597297	G/A	5	62841513	1.375	1.08864	0.110095	0.0390873	0.0633329	0.0655241	0.338794	0.382827	0.751915	0.59803	0.168039	0.157789	0.14534	3.64137e-46
snp_sb042060597425	G/A	5	62897095	1.66667	1.20237	0.231261	0.0753968	0.138074	0.142862	0.392546	0.453941	0.812825	0.657227	0.130386	0.403151	0.321886	1.34629e-53
snp_sb042060597662	A/G	5	62958918	1.375	1.11407	0.124648	0.0611111	0.0746296	0.0772031	0.263173	0.181141	0.6	0.511515	0.238744	0.153165	0.141435	6.14305e-30
snp_sb042060597664	G/A	5	62959323	1.375	1.11407	0.124648	0.0611111	0.0746296	0.0772031	0.263173	0.181141	0.6	0.511515	0.238744	0.153165	0.141435	6.14305e-30
snp_sb042060597666	A/G	5	62959664	1.375	1.1164	0.125309	0.0583333	0.0752778	0.0778736	0.283257	0.225092	0.623871	0.514615	0.2358	0.155481	0.143394	3.11982e-32
snp_sb042060598474	G/A	5	63377155	1.58333	1.20769	0.216105	0.0474206	0.133713	0.138344	0.425846	0.645354	0.9038	0.728743	0.0930564	0.493156	0.371555	9.1846e-66
snp_sb042060598805	T/C	5	63500451	1.45833	1.1551	0.170233	0.0529762	0.103898	0.107501	0.350013	0.490113	0.851446	0.708652	0.102782	0.356984	0.293265	1.37359e-58
snp_sb042060599037	T/C	5	63601444	1.125	1.02759	0.040112	0.025	0.0223148	0.0230843	-0.112129	-0.120332	0.884613	0.897007	0.0287047	0.217181	0.193597	4.77252e-63
snp_sb042060599139	G/C	5	63641149	1.20833	1.07776	0.0824397	0.0333333	0.0512963	0.0530651	0.184818	0.350181	0.75976	0.630297	0.146638	0.139105	0.12943	5.61387e-47
snp_sb042060599760	A/C	5	63938394	1.375	1.09396	0.11604	0.0444444	0.0668519	0.0691571	0.326713	0.33518	0.784367	0.675651	0.120013	0.206609	0.185266	5.98166e-50
snp_sb042060599982	C/G	5	64030569	1.375	1.12993	0.136428	0.0450397	0.0842361	0.0871807	0.238312	0.465316	0.895307	0.804196	0.0608693	0.429295	0.337148	1.15016e-64
[truncated: 1,006 more rows]
