# Supplementary material for: Genetic Diversity and Population Structure of Sorghum [Sorghum Bicolor (L.) Moench] Accessions as Revealed by Single Nucleotide Polymorphism Markers
Source: Front Plant Sci. 2022 Jan 5;12:799482. doi: 10.3389/fpls.2021.799482 (PMC8766336; doi:10.3389/fpls.2021.799482)
Supplement: Supplementary file 10 [file Table_5.XLSX]

## Sheet: Sheet1
Supplementary Table 5 Fifty SNP markers that showed significant deviation from Hardy-Weinberg Equilibrium (HWE) test and Candidate genes and its annotated function that mapped into sorghum phytozom Chr. = chromosome; SNP Pos. = SNP position; Ref/ Alt = reference and alternative alleles; Mis/gen = missing genotype; Map Pos. = MAP positions of the gene. Note: The map position is according to Sorghu…
SNP marker	Ref/Alt	chr.	SNP Pos.	Mis. Gen	Gene name	Map Pos.	Function
snp_sb001000020838	T/A	1	12263619	A/A	Sobic.001G152700	12262287-12265731	expressed protein
snp_sb001000355478	C/T	4	2371171	None	Sobic.004G029550	2365435-2366382	NA
snp_sb001000452883	G/A	4	46616273	None	Sobic.004G148300	46616563-46617600	RmlC-like cupins superfamily protein
snp_sb001000594732	C/T	6	2726668	None	Sobic.006G017400	2724122-2727716	Disease resistance protein (TIR-NBS-LRR class) family
snp_sb001000687053	C/T	6	40243159	None	Sobic.006G057300	40242354-40244140	senescence-related gene 1
snp_sb001000699926	G/A	6	46724767	None	Sobic.006G097700	46722402-46725328	Mitochondrial substrate carrier family protein
snp_sb001000723312	G/A	6	60687309	A/A	Sobic.006G275900	60685919-60688021	Tetratricopeptide repeat (TPR)-like superfamily protein
snp_sb001001053752	A/G	10	8828772	None	Sobic.010G097400	8827098-8829245	Putative thiol-disulphide oxidoreductase DCC
snp_sb001001059231	C/T	10	11379510	None	Sobic.010G111800	11375806-11380287	NAC domain transcriptional regulator superfamily protein
snp_sb001001064727	A/C	10	13577253	None	Sobic.010G119600	13576871-13578244	Ankyrin repeat family protein
snp_sb001001106121	C/T	10	35503319	T/T	Sobic.010G119600	35503319-35503319	NA
snp_sb001001143260	C/T	10	51187087	None	Sobic.010G175500	51186714-51187127	expressed protein
snp_sb001001145881	T/C	10	52404984	None	Sobic.010G184201	52404703-52406075	NA
snp_sb001001153639	C/T	10	56475443	T/T	Sobic.010G222600	56474460-56475995	BTB-POZ and MATH domain 2
snp_sb001001156095	A/G	10	58139340	None	Sobic.010G239400	58137843-58139795	Granulin repeat cysteine protease family protein
snp_sb001001159909	G/C	10	61048475	None	Sobic.010G277800	61048475-6104847	Peptidoglycan-binding LysM domain-containing protein
snp_sb001001160063	T/C	10	61145074	None	Sobic.010G278900	61145074-61145074	expressed protein
snp_sb042060173974	C/A	1	2361901	None	Sobic.001G030500	2360333-2362090	UDP-Glycosyltransferase superfamily protein
snp_sb042060264721	G/T	1	72884373	None	Sobic.001G452100	72881688-72885057	Caleosin-related family protein
snp_sb042060275625	C/G	1	78927289	C/C	Sobic.001G525000	78926198-78929951	Pectin lyase-like superfamily protein
snp_sb042060371275	C/T	3	5787297	None	Sobic.003G068200	5783717-5787694	Leucine-rich repeat protein kinase family protein
snp_sb042060433212	C/G	3	63802770	None	Sobic.003G309600	63801546-63804967	O-acyltransferase (WSD1-like) family protein
snp_sb042060445022	C/G	3	71981449	None	Sobic.003G412500	71979688-71982234	NA
snp_sb042060461709	A/G	4	2370680	None	Sobic.004G029550	2365435-2366382	NA
snp_sb042060515233	C/A	4	66381065	A/A	Sobic.004G330100	66380691-66382085	C-terminal domain phosphatase-like 4
snp_sb042060517985	A/G	4	67869324	None	Sobic.004G349900	67865785-67869996	hydroxyproline-rich glycoprotein family protein
snp_sb042060522765	G/A	4	67859982	None	Sobic.004G349800	67857297-67860435	AT2G45980.1
snp_sb042060527304	G/A	4	2370128	None	Sobic.004G029550	2365435-2366382	NA
snp_sb042060543510	T/G	5	7375869	None	Sobic.005G065500	7375300-7376907	Cysteine proteinases superfamily protein
snp_sb042060547851	C/G	5	9177815	None	Sobic.005G075100	9176676-9182428	NB-ARC domain-containing disease resistance protein
snp_sb042060547896	G/A	5	9181225	None	Sobic.005G075100	9176676-9182428	NB-ARC domain-containing disease resistance protein
snp_sb042060595042	G/C	5	62000875	G/G	Sobic.005G151100	62000216-62001210	sphingoid base hydroxylase 2
snp_sb042060599037	T/C	5	63601444	None	Sobic.005G161500	63599363-63604425	CYTOCHROME P450 51G1
snp_sb042060609009	A/G	5	67938439	None	Sobic.005G195200	67936177-67939122	expressed protein
snp_sb042060611257	A/G	5	68876145	None	Sobic.005G203400	68876712-68878978	Disease resistance protein (CC-NBS-LRR class) family
snp_sb042060612417	A/T	5	69210187	None	Sobic.005G206100	69210091-69212342	cytochrome P450, family 71, subfamily A, polypeptide 25
snp_sb042060612419	C/G	5	69210229	None	Sobic.005G206100	69210091-69212342	cytochrome P450, family 71, subfamily A, polypeptide 25
snp_sb042060614282	A/C	5	69866269	None	Sobic.005G212500	69862869-69871008	NB-ARC domain-containing disease resistance protein
snp_sb042060766286	G/A	7	6410245	None	Sobic.007G061000	6400636-6410340	NA
snp_sb042060786485	T/C	7	20897911	None	Sobic.007G099100	20897079-20898077	NA
snp_sb042060793631	G/A	7	23975936	None	Sobic.007G100900	23975788-23976761	NA
snp_sb042060860970	A/T	8	2335117	T/T	Sobic.008G025900	2332293-2335539	expressed protein
snp_sb042060866305	G/A	8	4460064	None	Sobic.008G045450	4459392-4462439	Ribonuclease H-like superfamily protein
snp_sb042060867616	C/G	8	5235118	G/G	Sobic.008G051900	5232111-5235102	ATPase, F0/V0 complex, subunit C protein
snp_sb042060870538	A/C	8	6429587	None	Sobic.008G060100	6428514-6429728	NA
snp_sb042060950340	C/T	8	60001096	None	Sobic.008G166400	59995819-60002710	LRR and NB-ARC domains-containing disease resistance protein
snp_sb042060963068	T/G	9	6379438	None	Sobic.009G060900	6379197-6381251	zinc knuckle family protein, expressed
snp_sb042061102446	T/G	10	61161683	None	NA	61161683-61161683	thioredoxin M-type 4
