# Supplementary material for: Genetic Diversity and Population Structure of Sorghum [Sorghum Bicolor (L.) Moench] Accessions as Revealed by Single Nucleotide Polymorphism Markers
Source: Front Plant Sci. 2022 Jan 5;12:799482. doi: 10.3389/fpls.2021.799482 (PMC8766336; doi:10.3389/fpls.2021.799482)
Supplement: Supplementary file 11 [file Table_6.XLSX]

## Sheet: Sheet1
Supplementary Table 6 Summary of Private Alleles by Geographic region, agro-ecologycal zones and peduncle shape
Geographic region groups	Locus	Allele	MAF
Eastern	snp_sb001000467166	A	0.395522
Eastern	snp_sb042060378432	G	0.287313
Eastern	snp_sb042060522877	A	0.473881
Eastern	snp_sb042060763225	G	0.186567
Northern	snp_sb042060813836	T	0.111111
Weastern	snp_sb042060593418	C	0.5
Weastern	snp_sb042060942012	T	0.4
Agro-ecologycal zones groups	Locus	Allele	MAF
Cool/Semiarid	snp_sb042060261157	C	0.111732
Cool/Semiarid	snp_sb042060261162	G	0.111732
Cool/Semiarid	snp_sb042060418099	G	0.125698
Cool/Semiarid	snp_sb042060610462	C	0.162011
Cool/Semiarid	snp_sb042060813836	T	0.111732
Warm/semiarid	snp_sb001001142846	A	0.266667
Warm/semiarid	snp_sb042060593418	C	0.25
Warm/semiarid	snp_sb042060853228	C	0.211111
Warm/semiarid	snp_sb042060854556	A	0.25
Warm/semiarid	snp_sb042060942012	T	0.2
Peduncle shape groups	Locus	Allele	MAF
Bent	snp_sb001000102867	C	0.170103
Bent	snp_sb001000118552	T	0.100515
Bent	snp_sb001000367099	A	0.131443
Bent	snp_sb001000687053	C	0.231959
Bent	snp_sb001000701612	C	0.0953608
Bent	snp_sb001000702528	G	0.0927835
Bent	snp_sb001000714037	T	0.110825
Bent	snp_sb001000716273	C	0.113402
Bent	snp_sb001000716366	C	0.146907
Bent	snp_sb001000716417	T	0.10567
Bent	snp_sb001000716779	T	0.115979
Bent	snp_sb001001045833	G	0.193299
Bent	snp_sb001001135620	T	0.128866
Bent	snp_sb001001149670	A	0.131443
Bent	snp_sb001001149703	T	0.136598
Bent	snp_sb001001153713	T	0.0953608
Bent	snp_sb042060174414	A	0.136598
Bent	snp_sb042060174448	A	0.134021
Bent	snp_sb042060174996	A	0.255155
Bent	snp_sb042060179249	T	0.213918
Bent	snp_sb042060179292	A	0.213918
Bent	snp_sb042060180666	G	0.123711
Bent	snp_sb042060181854	G	0.190722
Bent	snp_sb042060185552	G	0.319588
Bent	snp_sb042060205393	C	0.10567
Bent	snp_sb042060205511	T	0.0979381
Bent	snp_sb042060207342	G	0.0927835
Bent	snp_sb042060238285	T	0.103093
Bent	snp_sb042060267715	A	0.0927835
Bent	snp_sb042060267741	A	0.0927835
Bent	snp_sb042060267753	A	0.0927835
Bent	snp_sb042060267769	A	0.0927835
Bent	snp_sb042060274656	A	0.110825
Bent	snp_sb042060275152	G	0.121134
Bent	snp_sb042060275153	T	0.121134
Bent	snp_sb042060281071	C	0.100515
Bent	snp_sb042060285302	C	0.0979381
Bent	snp_sb042060289918	A	0.162371
Bent	snp_sb042060349680	A	0.180412
Bent	snp_sb042060351649	C	0.100515
Bent	snp_sb042060354931	T	0.0953608
Bent	snp_sb042060355654	T	0.0927835
Bent	snp_sb042060355700	T	0.0927835
Bent	snp_sb042060357288	A	0.154639
Bent	snp_sb042060357347	C	0.21134
Bent	snp_sb042060357408	A	0.154639
Bent	snp_sb042060363531	G	0.162371
Bent	snp_sb042060364056	C	0.141753
Bent	snp_sb042060366265	G	0.149485
Bent	snp_sb042060366279	G	0.149485
Bent	snp_sb042060373843	C	0.139175
Bent	snp_sb042060382362	G	0.134021
Bent	snp_sb042060382755	A	0.141753
Bent	snp_sb042060387546	A	0.141753
Bent	snp_sb042060413285	A	0.131443
Bent	snp_sb042060414119	A	0.118557
Bent	snp_sb042060422525	C	0.146907
Bent	snp_sb042060424905	T	0.10567
Bent	snp_sb042060425837	C	0.118557
Bent	snp_sb042060426210	C	0.136598
Bent	snp_sb042060426250	T	0.136598
Bent	snp_sb042060426251	C	0.136598
Bent	snp_sb042060430625	T	0.118557
Bent	snp_sb042060430638	A	0.118557
Bent	snp_sb042060431576	T	0.21134
Bent	snp_sb042060431898	G	0.115979
Bent	snp_sb042060432081	A	0.118557
Bent	snp_sb042060433060	A	0.108247
Bent	snp_sb042060438613	T	0.14433
Bent	snp_sb042060438681	C	0.146907
Bent	snp_sb042060442830	T	0.149485
Bent	snp_sb042060442831	A	0.146907
Bent	snp_sb042060442937	C	0.149485
Bent	snp_sb042060442990	A	0.149485
Bent	snp_sb042060443274	C	0.121134
Bent	snp_sb042060493961	G	0.103093
Bent	snp_sb042060512806	G	0.113402
Bent	snp_sb042060517070	T	0.242268
Bent	snp_sb042060518391	G	0.146907
Bent	snp_sb042060522765	G	0.115979
Bent	snp_sb042060523173	A	0.110825
Bent	snp_sb042060527671	A	0.126289
Bent	snp_sb042060528648	T	0.190722
Bent	snp_sb042060534693	C	0.190722
Bent	snp_sb042060534713	G	0.190722
Bent	snp_sb042060536135	T	0.115979
Bent	snp_sb042060536159	T	0.115979
Bent	snp_sb042060536178	T	0.115979
Bent	snp_sb042060536182	G	0.115979
Bent	snp_sb042060580806	T	0.149485
Bent	snp_sb042060585744	T	0.149485
Bent	snp_sb042060593418	C	0.115979
Bent	snp_sb042060611315	T	0.128866
Bent	snp_sb042060612417	A	0.103093
Bent	snp_sb042060612419	C	0.103093
Bent	snp_sb042060613086	A	0.170103
Bent	snp_sb042060758080	C	0.175258
Bent	snp_sb042060764804	A	0.136598
Bent	snp_sb042060767929	T	0.128866
Bent	snp_sb042060767931	C	0.128866
Bent	snp_sb042060773067	T	0.162371
Bent	snp_sb042060776855	C	0.103093
Bent	snp_sb042060788507	C	0.121134
Bent	snp_sb042060791048	A	0.10567
Bent	snp_sb042060791774	G	0.10567
Bent	snp_sb042060791775	C	0.10567
Bent	snp_sb042060792333	A	0.110825
Bent	snp_sb042060806813	A	0.10567
Bent	snp_sb042060813836	T	0.103093
Bent	snp_sb042060814908	C	0.10567
Bent	snp_sb042060816893	A	0.10567
Bent	snp_sb042060820586	T	0.10567
Bent	snp_sb042060821063	T	0.10567
Bent	snp_sb042060838745	G	0.206186
Bent	snp_sb042060838802	A	0.206186
Bent	snp_sb042060847157	C	0.149485
Bent	snp_sb042060848074	G	0.164948
Bent	snp_sb042060848282	C	0.123711
Bent	snp_sb042060855448	G	0.134021
Bent	snp_sb042060864788	A	0.167526
Bent	snp_sb042060870676	G	0.154639
Bent	snp_sb042060870685	A	0.154639
Bent	snp_sb042060929645	T	0.110825
Bent	snp_sb042060942012	T	0.0927835
Bent	snp_sb042060945055	T	0.134021
Bent	snp_sb042060951712	C	0.0927835
Bent	snp_sb042060954776	G	0.134021
Bent	snp_sb042061022322	A	0.152062
Bent	snp_sb042061022358	G	0.103093
Bent	snp_sb042061022431	T	0.149485
Bent	snp_sb042061025117	T	0.170103
Bent	snp_sb042061025530	T	0.159794
Bent	snp_sb042061025841	T	0.146907
Bent	snp_sb042061028262	C	0.123711
Bent	snp_sb042061029316	T	0.134021
Bent	snp_sb042060857602	C	0.181347
Bent	snp_sb042060775878	G	0.1875
Bent	snp_sb042060521102	G	0.198953
Bent	snp_sb042060475058	T	0.187831
Erect	snp_sb042060418099	G	0.136364
