# Supplementary material for: Genetic Diversity and Population Structure of Sorghum [Sorghum Bicolor (L.) Moench] Accessions as Revealed by Single Nucleotide Polymorphism Markers
Source: Front Plant Sci. 2022 Jan 5;12:799482. doi: 10.3389/fpls.2021.799482 (PMC8766336; doi:10.3389/fpls.2021.799482)
Supplement: Supplementary file 12 [file Table_7.XLSX]

## Sheet: Sheet1
Supplementary Table 7 Fst below the diagonal and gene flow (NM) above the diagonal and average FST of each accession against all other accessions (Diagonal). All pairs were significancetly different except SB12 Vs SB16
Fst (below diagonal), NM (above diagonal) and average FST of each accession against all other accessions (Diagonal)	SB1	SB10	SB11	SB12	SB13	SB14	SB15	SB16	SB17	SB18	SB19	SB2	SB20	SB21	SB22	SB23	SB24	SB3	SB4	SB5	SB6	SB7	SB8	SB9
SB1	0.7	0.0957921	0.101172	0.0614169	0.119736	0.0468164	0.0470843	0.0481918	0.104439	0.107667	0.0921667	0.104883	0.0668793	0.208867	0.136057	0.0527156	0.0511186	0.0733779	0.141342	0.0505258	0.152043	0.0784294	0.0953722	0.0704095
SB10	0.67808	0.552987	0.392449	0.114506	0.221217	0.0687068	0.0524487	0.0788984	0.459885	0.404963	0.401898	0.308308	0.164816	0.119629	0.237441	0.0847808	0.0817076	0.0981935	0.115894	0.0545445	0.0966427	0.108794	0.377413	0.20381
SB11	0.68126	0.34789	0.512071	0.15871	0.279478	0.111082	0.0816608	0.11508	0.731393	0.710561	0.653303	0.648065	0.309033	0.124717	0.30436	0.138134	0.120558	0.129753	0.125684	0.0746169	0.0993978	0.147434	0.430685	0.184105
SB12	0.76817	0.61171	0.56747	0.669485	0.126227	0.0250103	0.0163667	17.7717	0.158376	0.200037	0.132808	0.151118	0.0715027	0.0748985	0.139163	0.0352422	0.0395474	0.0491671	0.072556	0.017762	0.0598274	0.0572892	0.113957	0.0625537
SB13	0.64367	0.48363	0.44443	0.62308	0.548817	0.10929	0.142865	0.0958595	0.262411	0.337841	0.237391	0.269288	0.152393	0.152365	0.378834	0.133054	0.114218	0.182273	0.157375	0.107028	0.121905	0.192386	0.230719	0.140262
SB14	0.81667	0.7231	0.65974	0.86298	0.66283	0.783572	0.000370921	0.000523108	0.0969135	0.144615	0.0901687	0.10864	0.0376702	0.057357	0.113189	0.016019	0.00733541	0.0333817	0.0557427	0.00338397	0.0472221	0.0376898	0.0702613	0.0320999
SB15	0.81585	0.77366	0.72452	0.90596	0.60151	0.98539	0.806991	0.000375258	0.0775935	0.100755	0.0640652	0.0772221	0.0261403	0.0583854	0.119001	0.00856486	0.00491182	0.0350335	0.0546276	0.00365915	0.045909	0.0402583	0.0579785	0.0269226
SB16	0.81199	0.6941	0.65119	0.01645	0.6907	0.97799	0.98549	0.743727	0.114648	0.145109	0.0939917	0.109551	0.0396407	0.0585863	0.105991	0.0108084	0.0082831	0.0302002	0.0564005	0.00322643	0.0468527	0.0362819	0.0796934	0.0376431
SB17	0.6619	0.29872	0.23062	0.54387	0.44494	0.66198	0.70955	0.62319	0.495632	0.951749	0.805185	0.49947	0.254173	0.127583	0.288357	0.117086	0.116353	0.120045	0.129041	0.0711577	0.10188	0.138595	0.469377	0.243143
SB18	0.66017	0.33213	0.2405	0.49733	0.39093	0.58154	0.66523	0.58013	0.18426	0.469173	0.733769	0.59152	0.318236	0.133293	0.412665	0.178454	0.165463	0.155147	0.13553	0.0900743	0.106546	0.181152	0.424988	0.213554
SB19	0.70214	0.34326	0.2653	0.6113	0.48557	0.70722	0.77227	0.69792	0.21576	0.236	0.538927	0.520608	0.26332	0.11473	0.262911	0.111366	0.103102	0.110165	0.116069	0.0624801	0.0930782	0.121542	0.39103	0.186776
SB2	0.6596	0.38362	0.24978	0.55293	0.43711	0.63336	0.70802	0.63087	0.28518	0.259	0.29106	0.505199	0.291204	0.131444	0.306583	0.131961	0.12481	0.134264	0.135783	0.0743084	0.105177	0.141546	0.31474	0.171545
SB20	0.7493	0.52053	0.4002	0.69999	0.57353	0.8079	0.85842	0.79904	0.42466	0.38174	0.43871	0.39039	0.639492	0.0847023	0.171246	0.0508781	0.0446279	0.0617934	0.0820462	0.026692	0.0669145	0.0714045	0.15714	0.0791036
SB21	0.44695	0.56116	0.56942	0.65666	0.52664	0.70618	0.70255	0.70151	0.55356	0.54924	0.58737	0.5453	0.63017	0.593203	0.168705	0.0650398	0.0604699	0.0874171	0.187781	0.0623537	0.217297	0.0942524	0.117274	0.0842273
SB22	0.61015	0.4618	0.41905	0.59416	0.36839	0.64762	0.63631	0.66186	0.41815	0.34213	0.45526	0.40224	0.53976	0.49994	0.511856	0.124791	0.121578	0.287722	0.168276	0.134465	0.133039	0.51689	0.270455	0.151724
SB23	0.78967	0.66733	0.59251	0.80595	0.60447	0.86829	0.92526	0.9064	0.60649	0.51644	0.64316	0.57542	0.74607	0.67791	0.61355	0.732655	0.0192595	0.0424712	0.0639112	0.0105869	0.0529281	0.0468144	0.0933722	0.0437894
SB24	0.79774	0.67928	0.63037	0.79016	0.64457	0.92686	0.95012	0.9172	0.61216	0.5398	0.66687	0.59293	0.77274	0.69387	0.6238	0.85225	0.750675	0.0376704	0.0617163	0.0072624	0.0500383	0.042971	0.0887697	0.0406026
SB3	0.74425	0.66631	0.62857	0.79983	0.54664	0.86037	0.85456	0.87134	0.62632	0.5739	0.66772	0.59792	0.75556	0.63806	0.42947	0.81242	0.83491	0.702064	0.0868089	0.0464528	0.074288	0.134007	0.111453	0.0599408
SB4	0.56914	0.5971	0.59599	0.69437	0.54534	0.74381	0.74769	0.74126	0.57767	0.57206	0.61396	0.56416	0.66737	0.44536	0.5262	0.71209	0.72072	0.67022	0.631664	0.0585994	0.135763	0.0953293	0.118385	0.0829454
SB5	0.80336	0.7657	0.73894	0.89941	0.66473	0.96933	0.96715	0.97018	0.72538	0.68729	0.77328	0.71441	0.85643	0.69001	0.60556	0.91832	0.94046	0.81233	0.7344	0.800774	0.0527718	0.0534357	0.062086	0.0278728
SB6	0.58652	0.67761	0.68651	0.77431	0.64101	0.81702	0.82121	0.81786	0.66874	0.66386	0.70162	0.66034	0.75067	0.43827	0.61677	0.7905	0.80269	0.74351	0.58005	0.79809	0.704287	0.0779787	0.0937249	0.0691472
SB7	0.72457	0.63383	0.58817	0.76258	0.52434	0.83113	0.8218	0.83581	0.58355	0.52692	0.63471	0.57648	0.71703	0.61675	0.29289	0.78576	0.80367	0.60365	0.64381	0.77471	0.72721	0.667198	0.128058	0.0673048
SB8	0.67167	0.32505	0.3186	0.60045	0.46443	0.70499	0.74326	0.6777	0.28674	0.31365	0.33897	0.37037	0.52066	0.56134	0.42217	0.63355	0.64806	0.62625	0.58581	0.7298	0.67678	0.58484	0.508173	0.214243
SB9	0.75255	0.49309	0.54661	0.75904	0.6103	0.86586	0.88502	0.84555	0.45615	0.49674	0.5459	0.53908	0.70744	0.64546	0.58545	0.80726	0.8243	0.78336	0.6797	0.87854	0.75745	0.75134	0.46767	0.681907

## Sheet: Sheet2
Supplementary Table 7 Corrected avarage pairwise difference , Average number of pairwise difference within accessions(PiX) and pairwise net number of allele differences (Nei’s distance, d) between 24 accessions, agroecologycal groups and geographical regions. Below diagonal= Corrected average pairwise difference (PiXY-(PiX+PiY)/2), Diagonal elements= Average number of pairwise difference within a…
Abave diagonal = pairwise net number of allele differences (Nei’s distance, d)	Agro/ecologycal zones
Diagonal elements = Average number of pairwise difference within accessions(PiX)			Cool/Semiarid	cool/subhumid	Warm/semiarid
Below diagonal = Corrected average pairwise difference (PiXY-(PiX+PiY)/2)	Cool/Semiarid	816.152	0.10059	0.08373
	cool/subhumid	88.6175	742.165	0.12909
	Warm/semiarid	78.8753	126.42	963.653
	Geographic regions
		Eastern	Northern	Western
	Eastern	731.943	0.12292	0.35669
	Northern	96.461	640.361	0.4055
	Western	448.548	507.61	1104.65
