# Supplementary material for: Genetic Diversity and Population Structure of Sorghum [Sorghum Bicolor (L.) Moench] Accessions as Revealed by Single Nucleotide Polymorphism Markers
Source: Front Plant Sci. 2022 Jan 5;12:799482. doi: 10.3389/fpls.2021.799482 (PMC8766336; doi:10.3389/fpls.2021.799482)
Supplement: Supplementary file 13 [file Table_8.XLSX]

## Sheet: Sheet1
Supplementary Table 8 Corrected avarage pairwise difference , Average number of pairwise difference within accessions(PiX) and pairwise net number of allele differences (Nei’s distance, d) between 24 accessions, agroecologycal groups and geographical regions. Below diagonal= Corrected average pairwise difference (PiXY-(PiX+PiY)/2), Diagonal elements= Average number of pairwise difference within a…
Abave diagonal = pairwise net number of allele differences (Nei’s distance, d)		SB1	SB10	SB11	SB12	SB13	SB14	SB15	SB16	SB17	SB18	SB19	SB2	SB20	SB21	SB22	SB23	SB24	SB3	SB4	SB5	SB6	SB7	SB8	SB9
Diagonal elements = Average number of pairwise difference within accessions(PiX)	SB1	522.816	0.47557	0.483732	0.522653	0.472516	0.568522	0.564554	0.547513	0.473144	0.48193	0.498748	0.474493	0.523075	0.279073	0.427829	0.557996	0.548668	0.512212	0.39677	0.547963	0.357474	0.496547	0.47549	0.519006
Below diagonal = Corrected average pairwise difference (PiXY-(PiX+PiY)/2)	SB10	955.649	379.286	0.0859016	0.158027	0.182551	0.192812	0.260563	0.16598	0.0750712	0.0896096	0.0768671	0.110575	0.123454	0.406285	0.179682	0.183704	0.177617	0.240541	0.378404	0.272257	0.465206	0.228602	0.0805766	0.106777
	SB11	968.151	203.408	383.131	0.133688	0.154457	0.146417	0.204115	0.141103	0.053844	0.0581238	0.0542319	0.0602303	0.0766521	0.41788	0.149406	0.134486	0.146212	0.204436	0.373562	0.24176	0.489569	0.188195	0.0784556	0.136121
	SB12	1085.33	395.708	338.098	132.269	0.219038	0.166639	0.267341	0.00103119	0.13563	0.115576	0.142318	0.14375	0.145966	0.459317	0.211756	0.175475	0.132118	0.269225	0.419111	0.305578	0.533277	0.248826	0.162459	0.191543
	SB13	925.269	414.724	353.885	523.925	501.618	0.201896	0.151054	0.233633	0.167188	0.136248	0.169247	0.163944	0.196908	0.394289	0.140574	0.183994	0.206533	0.177235	0.344694	0.218562	0.457844	0.175674	0.173748	0.226588
	SB14	1186.75	490.632	381.122	448.031	502.879	9.9977	0.257511	0.172852	0.171657	0.124122	0.156488	0.153551	0.161048	0.499231	0.211405	0.119251	0.15569	0.254334	0.444542	0.301559	0.552684	0.25325	0.196232	0.237645
	SB15	1180.6	642.547	517.135	685.93	386.235	678.508	10.1241	0.279717	0.219128	0.182632	0.227111	0.222866	0.24114	0.487623	0.200035	0.236785	0.244485	0.241338	0.456377	0.278488	0.574251	0.23536	0.243133	0.290644
	SB16	1153.49	427.834	368.23	1.20084	572.764	474.17	729.358	11.3471	0.143432	0.123716	0.149804	0.152262	0.15269	0.485751	0.227543	0.182824	0.137644	0.285535	0.43835	0.322123	0.558904	0.264707	0.171239	0.1994
	SB17	939.842	174.432	122.967	339.582	376.334	438.029	546.541	371.023	437.326	0.0460986	0.0457289	0.0772585	0.0937682	0.414496	0.160276	0.162109	0.153734	0.225495	0.368783	0.258972	0.482978	0.20389	0.0734337	0.103841
	SB18	950.188	208.316	132.771	290.735	307.145	323.415	462.561	322.478	100.831	455.434	0.0522629	0.069789	0.0808569	0.415049	0.118011	0.114225	0.116786	0.183781	0.367733	0.220184	0.483381	0.164452	0.0852707	0.126995
	SB19	1003.35	184.421	128.479	362.281	391.76	408.77	574.098	392.54	105.341	121.074	328.457	0.0675874	0.0803902	0.425134	0.160995	0.146866	0.149156	0.219115	0.377187	0.252578	0.4873	0.208592	0.078758	0.120674
	SB2	939.555	257.939	138.178	358.173	368.29	394.66	554.159	391.614	176.391	157.697	159.17	446.926	0.0826401	0.403298	0.151741	0.144359	0.144298	0.201614	0.350327	0.249557	0.468252	0.201101	0.108112	0.149457
	SB20	1071.5	307.473	192.599	380.841	467.86	429.344	619.356	408.605	233.059	200.552	204.247	205.277	194.182	0.437786	0.186084	0.159484	0.16225	0.247762	0.402087	0.277017	0.515727	0.229149	0.131643	0.177468
	SB21	550.779	790.797	808.906	929.96	746.436	1021.73	1004.21	1000.68	792.055	789.377	831.781	771.813	881.27	840.221	0.370085	0.484061	0.503589	0.461592	0.320178	0.47595	0.264935	0.4433	0.413793	0.465396
	SB22	844.326	404.235	338.748	503.906	308.465	520.219	495.336	555.353	356.971	263.032	369.641	337.484	439.958	698.008	556.11	0.213315	0.209183	0.117725	0.337524	0.184534	0.435495	0.0700763	0.156269	0.222248
	SB23	1150.75	460.186	344.117	461.988	452.22	330.274	620.978	491.666	406.521	291.369	377.296	363.981	417.778	979.134	513.063	90.2	0.157937	0.250564	0.429389	0.284828	0.546425	0.250819	0.170895	0.221316
	SB24	1144.13	449.82	375.584	356.987	506.825	426.653	642.537	380.421	390.385	300.737	386.141	367.242	427.617	1017.19	508.588	425.497	57.3356	0.258756	0.423879	0.298463	0.555468	0.251295	0.168337	0.215769
	SB3	1052.47	572.257	493.842	664.839	423.285	648.502	618.772	717.336	534.537	441.726	531.478	481.386	609.976	917.348	284.77	629.534	651.995	200.501	0.412966	0.199351	0.497911	0.134736	0.211987	0.283095
	SB4	776.168	772.026	763.773	891.326	692.08	961.524	981.59	950.727	745.26	740.43	779.939	711.462	849.236	599.252	671.052	918.314	915.744	866.663	652.363	0.444641	0.412275	0.389276	0.367206	0.420035
	SB5	1147.6	663.158	597.389	765.54	535.919	773.976	722.775	818.597	629.065	543.32	626.604	607.743	695.42	978.485	456.809	726.13	760.647	518.278	955.787	38.9747	0.509401	0.192434	0.244437	0.320933
	SB6	733.561	941.214	979.555	1104.28	904.466	1164.15	1197.86	1173.74	957.686	954.798	987.496	931.604	1062.28	527.31	859.085	1135.08	1156.99	1031.91	803.77	1087.85	511.462	0.494178	0.480625	0.524492
	SB7	1016.86	540.725	452.307	614.347	414.421	640.489	600.412	665.876	481.756	393.008	502.775	474.496	563.097	877.444	167.004	624.366	629.6	343.271	815.739	497.311	1015.32	250.269	0.193657	0.268154
	SB8	950.123	189.374	184.501	404.505	393.553	497.15	602.453	438.853	169.526	196.845	188.329	250.883	326	797.407	351.487	428.993	426.661	508.178	748.494	601.033	960.6	462.294	406.071	0.102679
	SB9	1068.55	268.275	339.409	491.694	533.661	612.923	731.373	523.548	258.856	313.558	305.57	366.574	452.297	928.589	519.722	565.648	556.52	687.775	883.069	791.61	1079.55	649.907	257.406	179.913
